# Supplementary material for: A facile synthesis of pyrrolo[2,3-b]quinolines via a Rh(i)-catalyzed carbodiimide-Pauson–Khand-type reaction
Source: Royal Society of Chemistry journal article supplement (doi:10.1039/b924301a), 2010-01-01

*Supplementary Information Material*  
*for Organic & Biomolecular Chemistry*

**A facile synthesis of pyrrolo[2,3-*b*]quinolines via a  
Rh(I)-catalyzed carbodiimide-Pauson–Khand  
reaction**

Takao Saito,\* Naoki Furukawa, and Takashi Otani

*Department of Chemistry, Faculty of Science, Tokyo University of Science,  
Kagurazaka, Shinjuku-ku, Tokyo 162-8601, Japan  
tsaito@rs.kagu.tus.ac.jp; totani@rs.kagu.tus.ac.jp*

**General information**

All melting points were determined on a Yanaco melting point apparatus and are uncorrected. Infrared spectra were recorded on a Horiba FT-710 model spectrophotometer. <sup>1</sup>H and <sup>13</sup>C NMR spectral data were obtained with a Bruker Avance-600, a JEOL JNM-EX 500, or a JEOL JNM-EX 300 instrument and chemical shifts are reported in ppm down field from tetramethylsilane (TMS) using an internal standard of TMS or CDCl<sub>3</sub>. HRMS analysis were performed on a Bruker Daltonics microTOF. 2-Azidobenzaldehyde<sup>17</sup> and 1-(2-azidophenyl)-ethanone<sup>18</sup> were prepared according to the reported method.

**Typical procedure for preparation of alcohols 7 and 8: 1-(2-Azidophenyl)-4,4-dimethylpent-2-yn-1-ol (7c).**

**Typical procedure for preparation of 9 and 10: 1-Azido-2-(but-2-ynyl)benzene (9b).**

**Typical procedure for preparation of 11: 1-Azido-2-(2-methoxypent-3-yn-2-yl)benzene (11a).**

**Typical procedure for preparation of iminophosphoranes 12–14: 2-(But-2-ynyl)-*N*-(triphenylphosphonylidene)-benzen-amine (12b).**

**Typical procedure for preparation of carbodiimides 4, 5, and 6: (2-But-2-ynyl)propylcarbodiimide (4e).**

**Typical procedure for the catalytic Pauson–Khand reaction using [Rh(CO)<sub>2</sub>Cl]<sub>2</sub>-dppp to produce 15: 3-Pentyl-1-propyl-1*H*-pyrrolo[2,3-*b*]quinolin-2(3*H*)-one (15a) (Table 2, Entry 1).**

**Typical procedure for the catalytic Pauson–Khand reaction using [Rh(CO)<sub>2</sub>Cl]<sub>2</sub> to produce 17 and 18 (Table 3, Entry 3), and 19a and 20.**

**Typical procedure for preparation of alcohols 7 and 8: 1-(2-Azidophenyl)-4,4-dimethylpent-2-yn-1-ol (7c).**

*n*-Butyllithium/*n*-hexane solution (1.6 M, 9.6 mL, 15.1 mmol) was added to a solution of 3,3-dimethyl-1-butyne (1.80 mL, 15.1 mmol) in THF (5 mL) at  $-78\text{ }^{\circ}\text{C}$ . After stirring for 2 h, a solution of 2-azidobenzaldehyde (1.50 g, 10.1 mmol) in THF (10 mL) was added, and the mixture was stirred for a further 2 h. The mixture was quenched with saturated aqueous ammonium chloride and extracted with dichloromethane. The organic extracts were washed with brine, dried over anhydrous magnesium sulfate, and evaporated. The residue was purified by silica gel column chromatography (ethyl acetate/hexane = 1:4) to give alcohol **7c** (2.18 g, 8.97 mmol, 89%) as a yellow oil.

**1-(2-Azidophenyl)oct-2-yn-1-ol (7a). 99%**

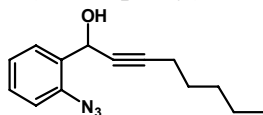

Brown oil.

IR (neat/ $\text{cm}^{-1}$ ): 3394, 2931, 2229, 2129, 1589, 1295.

$^1\text{H}$  NMR (500 MHz,  $\text{CDCl}_3$ ,  $\delta$ ): 7.66 (dd,  $J = 1.7, 7.8$  Hz, 1H), 7.36 (ddd,  $J = 1.5, 7.3, 8.1$  Hz, 1H), 7.19–7.15 (m, 2H), 5.64 (dt,  $J = 2.0, 6.0$  Hz, 1H), 2.61–2.57 (m, 1H), 2.26 (dt,  $J = 2.0, 7.2$  Hz, 2H), 1.58–1.50 (m, 2H), 1.27–1.41 (m, 4H), 0.90 (t,  $J = 7.1$  Hz, 3H).

$^{13}\text{C}$  NMR (125 MHz,  $\text{CDCl}_3$ ,  $\delta$ ): 137.32 (C), 132.17 (C), 129.55 (CH), 128.35 (CH), 125.01 (CH), 118.23 (CH), 87.81 (C), 78.93 (C), 60.78 (CH), 31.04 ( $\text{CH}_2$ ), 28.21 ( $\text{CH}_2$ ), 22.14 ( $\text{CH}_2$ ), 18.79 ( $\text{CH}_2$ ), 13.93 ( $\text{CH}_3$ ).

HRMS-ESI ( $m/z$ ):  $[\text{M}+\text{Na}]^+$  calcd for  $\text{C}_{14}\text{H}_{17}\text{N}_3\text{NaO}$ , 266.1264; found, 266.1267.

**1-(2-Azidophenyl)but-2-yn-1-ol (7b). 99%**

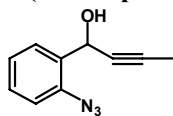

Yellow solid; mp: 50.0–51.5  $^{\circ}\text{C}$ .

IR (KBr/ $\text{cm}^{-1}$ ): 3301, 2291, 2129, 1581, 1303, 748.

$^1\text{H}$ -NMR (300 MHz,  $\text{CDCl}_3$ ,  $\delta$ ): 7.65 (dd,  $J = 1.7, 8.0$  Hz, 1H), 7.36 (ddd,  $J = 1.5, 7.2, 7.8$  Hz, 1H), 7.20–7.12 (m, 2H), 5.64–5.56 (m, 1H), 2.80–2.68 (br, 1H), 1.90 (d,  $J = 2.2$  Hz, 3H).

$^{13}\text{C}$ -NMR (75 MHz,  $\text{CDCl}_3$ ,  $\delta$ ): 137.15 (C), 132.05 (C), 129.50 (CH), 128.22 (CH), 124.99 (CH), 118.16 (CH), 83.03 (C), 78.17 (C), 60.60 (CH), 3.70 ( $\text{CH}_3$ ).

HRMS-ESI ( $m/z$ ):  $[\text{M}+\text{Na}]^+$  calcd for  $\text{C}_{10}\text{H}_9\text{N}_3\text{NaO}$ , 210.0638; found, 210.0633.

Anal calcd for  $\text{C}_{10}\text{H}_9\text{N}_3\text{O}$ : C 64.16, H 4.85, N 22.45, found: C 64.20, H 5.23, N 22.06.

**1-(2-Azidophenyl)-4,4-dimethylpent-2-yn-1-ol (7c). 89%**

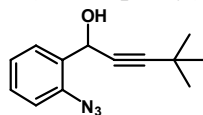

Yellow oil.

IR (neat/ $\text{cm}^{-1}$ ): 2970, 2129, 1589, 1481, 1296, 987, 748.

$^1\text{H}$ -NMR (500 MHz,  $\text{CDCl}_3$ ,  $\delta$ ): 7.68 (dd,  $J = 1.4, 7.9$  Hz, 1H), 7.37 (ddd,  $J = 1.5, 7.8, 7.8$  Hz, 1H), 7.20–7.14 (m, 2H), 5.65 (d,  $J = 5.8$  Hz, 1H), 2.49 (dd,  $J = 2.4, 5.8$  Hz, 1H), 1.26 (d,  $J = 0.5$  Hz, 9H).

$^{13}\text{C}$ -NMR (125 MHz,  $\text{CDCl}_3$ ,  $\delta$ ): 137.53 (C), 132.23 (C), 129.62 (CH), 128.49 (CH), 125.03 (CH), 118.26 (CH), 95.99 (C), 77.30 (C), 60.65 (CH), 38.89 ( $\text{CH}_3 \times 3$ ), 27.51 (C).

HRMS-ESI ( $m/z$ ):  $[\text{M}+\text{Na}]^+$  calcd for  $\text{C}_{13}\text{H}_{15}\text{N}_3\text{NaO}$ , 252.1107; found, 252.1105.

**1-(2-Azidophenyl)-3-phenylprop-2-yn-1-ol (7d). 96%**

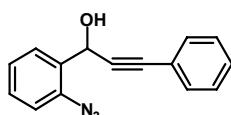

Yellow oil.

IR (neat/ $\text{cm}^{-1}$ ): 3016, 2237, 2114, 1589, 1489, 1296, 1026, 910, 756.

$^1\text{H-NMR}$  (500 MHz,  $\text{CDCl}_3$ ,  $\delta$ ): 7.73 (d,  $J = 7.8$  Hz, 1H), 7.50–7.43 (m, 2H), 7.39 (ddd,  $J = 1.1, 7.8, 7.8$  Hz, 1H), 7.34–7.27 (m, 3H), 7.20 (dd,  $J = 7.6$  Hz, 1H), 7.19 (dd,  $J = 6.7, 6.7$  Hz, 1H), 5.87 (d,  $J = 6.3$  Hz, 1H), 2.79–2.71 (br, 1H).

$^{13}\text{C-NMR}$  (125 MHz,  $\text{CDCl}_3$ ,  $\delta$ ): 137.46 (C), 131.77 (CH $\times$ 2), 131.55 (C), 129.83 (CH), 128.60 (CH), 128.51 (CH), 128.27 (CH $\times$ 2), 125.14 (CH), 122.35 (C), 118.37 (CH), 87.84 (C), 86.61 (C), 61.16 (CH).

HRMS-ESI ( $m/z$ ):  $[\text{M}+\text{Na}]^+$  calcd for  $\text{C}_{15}\text{H}_{11}\text{N}_3\text{NaO}$ , 272.0794; found, 272.0786.

**1-(2-Azidophenyl)-3-(*tert*-butyldimethylsilyl)prop-2-yn-1-ol (7e).** 78%

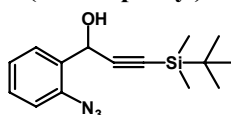

Yellow oil.

IR (neat/ $\text{cm}^{-1}$ ): 2954, 2854, 2129, 1728, 1466, 1296, 1041, 833, 756.

$^1\text{H-NMR}$  (500 MHz,  $\text{CDCl}_3$ ,  $\delta$ ): 7.67 (dd,  $J = 1.4, 7.8$  Hz, 1H), 7.38 (ddd,  $J = 1.3, 7.7, 7.7$  Hz, 1H), 7.18 (dd,  $J = 7.7, 7.7$  Hz, 1H), 7.18 (d,  $J = 7.8$  Hz, 1H), 5.65 (s, 1H), 2.68–2.56 (br, 1H), 0.94 (s, 9H), 0.13 (d,  $J = 4.3$  Hz, 6H).

$^{13}\text{C-NMR}$  (125 MHz,  $\text{CDCl}_3$ ,  $\delta$ ): 137.53 (C), 131.41 (C), 129.79 (CH), 128.29 (CH), 125.06 (CH), 118.29 (CH), 104.67 (C), 90.04 (C), 61.03 (CH), 26.00 (CH $_3$  $\times$ 3), 16.53 (C), -4.73 (CH $_3$ ), -4.75 (CH $_3$ ).

HRMS-ESI ( $m/z$ ):  $[\text{M}+\text{Na}]^+$  calcd for  $\text{C}_{15}\text{H}_{21}\text{N}_3\text{NaOSi}$ , 310.1346; found, 310.1339.

**1-(2-Azidophenyl)-3-(trimethylsilyl)prop-2-yn-1-ol (7f).** 80%

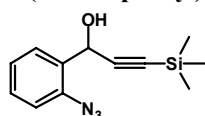

Yellow oil.

IR (neat/ $\text{cm}^{-1}$ ): 2962, 2129, 1589, 1489, 1296, 1041, 849, 756.

$^1\text{H-NMR}$  (500 MHz,  $\text{CDCl}_3$ ,  $\delta$ ): 7.67 (d,  $J = 7.9$  Hz, 1H), 7.41–7.36 (m, 1H), 7.21–7.16 (m, 2H), 5.56 (dd,  $J = 1.8, 6.1$  Hz, 1H), 2.66–2.57 (br, 1H), 0.20 (s, 9H).

$^{13}\text{C-NMR}$  (125 MHz,  $\text{CDCl}_3$ ,  $\delta$ ): 137.55 (C), 131.31 (C), 129.82 (CH), 128.52 (CH), 125.10 (CH), 118.32 (CH), 103.90 (C), 91.71 (C), 60.94 (CH), -0.20 (CH $_3$  $\times$ 3).

HRMS-ESI ( $m/z$ ):  $[\text{M}+\text{Na}]^+$  calcd for  $\text{C}_{12}\text{H}_{15}\text{N}_3\text{NaOSi}$ ; 268.0877; found, 268.0874.

**2-(2-Azidophenyl)pent-3-yn-2-ol (8a).** 55%

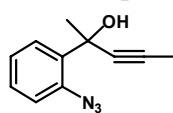

Yellow oil.

IR (neat/ $\text{cm}^{-1}$ ): 3055, 2129, 1473, 1265, 741.

$^1\text{H-NMR}$  (500 MHz,  $\text{CDCl}_3$ ,  $\delta$ ): 7.67 (dd,  $J = 1.4, 7.8$  Hz, 1H), 7.34 (ddd,  $J = 1.4, 7.7, 7.7$  Hz, 1H), 7.19 (d,  $J = 7.9$  Hz, 1H), 7.14 (ddd,  $J = 1.2, 7.6, 7.6$  Hz, 1H), 3.82 (s, 1H), 1.90 (s, 3H), 1.86 (s, 3H).

$^{13}\text{C-NMR}$  (125 MHz,  $\text{CDCl}_3$ ,  $\delta$ ): 136.58 (C), 135.67 (C), 128.96 (CH), 127.05 (CH), 124.91 (CH), 119.12 (CH), 82.21 (C), 80.83 (C), 69.14 (C), 30.44 (CH $_3$ ), 3.75 (CH $_3$ ).

HRMS-ESI ( $m/z$ ):  $[\text{M}+\text{Na}]^+$  calcd for  $\text{C}_{11}\text{H}_{11}\text{N}_3\text{NaO}$ , 224.0794; found, 224.0789.

**2-(2-Azidophenyl)-5,5-dimethylhex-3-yn-2-ol (8b).** 80%

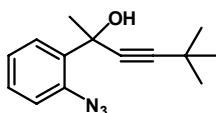

Yellow oil.

IR (neat/  $\text{cm}^{-1}$ ): 2970, 1805, 1627, 1473, 1365, 1196, 1119, 941, 748.

$^1\text{H-NMR}$  (600 MHz,  $\text{CDCl}_3$ ,  $\delta$ ): 7.69 (d,  $J = 7.9$  Hz, 1H), 7.33 (dd,  $J = 7.6, 7.6$  Hz, 1H), 7.19 (d,  $J = 7.8$  Hz, 1H), 7.14 (dd,  $J = 7.6, 7.6$  Hz, 1H), 3.71–3.67 (br, 1H), 1.84 (s, 3H), 1.25 (s, 9H).

$^{13}\text{C-NMR}$  (150 MHz,  $\text{CDCl}_3$ ,  $\delta$ ): 136.66 (C), 136.10 (C), 128.88 (CH), 127.15 (CH), 124.89 (CH), 119.24 (CH), 93.58 (C), 81.56 (C), 69.25 (C), 30.96 ( $\text{CH}_3$ ), 30.78 ( $\text{CH}_3 \times 3$ ), 27.39 (C).

HRMS-ESI ( $m/z$ ):  $[\text{M}+\text{Na}]^+$  calcd for  $\text{C}_{14}\text{H}_{17}\text{N}_3\text{NaO}$ , 266.1264; found, 266.1254.

### 2-(2-Azidophenyl)-4-phenylbut-3-yn-2-ol (8c). 53%

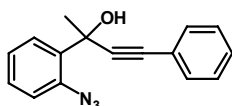

Yellow oil.

IR (neat/  $\text{cm}^{-1}$ ): 3062, 2978, 2121, 1612, 1466, 1103, 995, 941, 725.

$^1\text{H-NMR}$  (500 MHz,  $\text{CDCl}_3$ ,  $\delta$ ): 7.70 (dd,  $J = 1.5, 7.9$  Hz, 1H), 7.47–7.43 (m, 2H), 7.39–7.35 (m, 1H), 7.32–7.28 (m, 3H), 7.22 (dd,  $J = 1.1, 7.9$  Hz, 1H), 7.17 (ddd,  $J = 1.2, 7.7, 7.7$  Hz, 1H), 3.94 (s, 1H), 1.97 (s, 3H).

$^{13}\text{C-NMR}$  (125 MHz,  $\text{CDCl}_3$ ,  $\delta$ ): 136.80 (C), 135.24 (C), 131.71 ( $\text{CH} \times 2$ ), 129.13 (CH), 128.36 (CH), 128.20 ( $\text{CH} \times 2$ ), 126.86 (CH), 125.00 (CH), 122.63 (C), 119.22 (CH), 91.94 (C), 84.36 (C), 69.14 (C), 30.12 ( $\text{CH}_3$ ).

HRMS-ESI ( $m/z$ ):  $[\text{M}+\text{Na}]^+$  calcd for  $\text{C}_{16}\text{H}_{13}\text{N}_3\text{NaO}$ , 286.0951; found, 286.0948.

### Typical procedure for preparation of 9 and 10: 1-Azido-2-(but-2-ynyl)benzene (9b).

Trifluoroacetic acid (0.22 mL, 3.0 mmol) was added to a mixture of alcohol **7b** (374 mg, 2.0 mmol) and triethylsilane (0.48 mL, 3.00 mmol) in dichloromethane (7 mL) at 0 °C. After stirring for 10 h at 0 °C, the mixture was quenched by addition of saturated aqueous sodium hydrogen carbonate. The mixture was extracted with dichloromethane, washed with brine, dried over anhydrous magnesium sulfate, and evaporated. The residue was purified by silica gel column chromatography (hexane) to give alkyne **9b** (142 mg, 0.83 mmol, 41%) as a yellow solid.

### 1-Azido-2-(oct-2-ynyl)benzene (9a). 61%

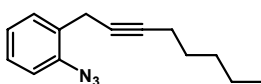

Brown oil.

IR (neat/  $\text{cm}^{-1}$ ): 2931, 2121, 1581, 1288.

$^1\text{H NMR}$  (500 MHz,  $\text{CDCl}_3$ ,  $\delta$ ): 7.54 (d,  $J = 7.6$  Hz, 1H), 7.28 (dd,  $J = 7.7, 7.7$  Hz, 1H), 7.13 (dd,  $J = 7.7, 7.7$  Hz, 1H), 7.12 (d,  $J = 7.8$  Hz, 1H), 3.48 (t,  $J = 2.2$  Hz, 2H), 2.22 (tt,  $J = 2.3, 7.1$  Hz, 2H), 1.57–1.50 (m, 2H), 1.42–1.28 (m, 4H), 0.90 (t,  $J = 7.2$  Hz, 3H).

$^{13}\text{C NMR}$  (125 MHz,  $\text{CDCl}_3$ ,  $\delta$ ): 137.51 (C), 129.57 (CH), 128.93 (C), 127.82 (CH), 124.80 (CH), 117.74 (CH), 83.17 (C), 76.57 (C), 31.11 ( $\text{CH}_2$ ), 28.70 ( $\text{CH}_2$ ), 22.22 ( $\text{CH}_2$ ), 20.59 ( $\text{CH}_2$ ), 18.82 ( $\text{CH}_2$ ), 14.0 ( $\text{CH}_3$ ).

HRMS-ESI ( $m/z$ ):  $[\text{M}+\text{Na}]^+$  calcd for  $\text{C}_{14}\text{H}_{17}\text{N}_3\text{Na}$ , 250.1315; found, 250.1312.

### 1-Azido-2-(but-2-ynyl)benzene (9b). 41%

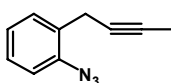

Yellow solid; mp: 49.5–50.5 °C.

IR (KBr/  $\text{cm}^{-1}$ ): 2916, 2283, 2121, 1581, 1288, 748.

$^1\text{H-NMR}$  (300 MHz,  $\text{CDCl}_3$ ,  $\delta$ ): 7.51 (d,  $J = 7.3$  Hz, 1H), 7.26 (dd,  $J = 7.3, 7.5$  Hz, 1H), 7.20–7.04 (m, 2H), 3.44 (s, 2H), 1.84 (d,  $J = 1.5$  Hz, 3H).

$^{13}\text{C-NMR}$  (75 MHz,  $\text{CDCl}_3$ ,  $\delta$ ): 137.45 (C), 129.57 (CH), 128.75 (C), 127.81 (CH), 124.75 (CH), 117.69 (CH), 78.14 (C), 75.79 (C), 20.49 ( $\text{CH}_2$ ), 3.52 ( $\text{CH}_3$ ).

HRMS-ESI ( $m/z$ ):  $[\text{M}+\text{Na}]^+$  calcd for  $\text{C}_{10}\text{H}_9\text{N}_3\text{Na}$ , 194.0689; found, 194.0691.

**1-Azido-2-(4,4-dimethylpent-2-ynyl)benzene (9c).** 85%

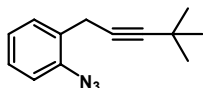

Yellow oil.

IR (neat/ $\text{cm}^{-1}$ ): 2970, 2121, 1705, 1581, 1489, 1288, 748.

$^1\text{H-NMR}$  (600 MHz,  $\text{CDCl}_3$ ,  $\delta$ ): 7.56 (d,  $J = 7.6$  Hz, 1H), 7.28 (dd,  $J = 7.6, 7.6$  Hz, 1H), 7.14 (dd,  $J = 7.6, 7.6$  Hz, 1H), 7.11 (d,  $J = 7.7$  Hz, 1H), 3.48 (s, 2H), 1.26 (s, 9H).

$^{13}\text{C-NMR}$  (150 MHz,  $\text{CDCl}_3$ ,  $\delta$ ): 137.45 (C), 129.30 (CH), 128.95 (C), 127.71 (CH), 124.79 (CH), 117.63 (CH), 91.98 (C), 74.91 (C), 31.28 ( $\text{CH}_3 \times 3$ ), 27.50 (C), 20.39 ( $\text{CH}_2$ ).

HRMS-ESI ( $m/z$ ):  $[\text{M}+\text{Na}]^+$  calcd for  $\text{C}_{13}\text{H}_{15}\text{N}_3\text{Na}$ , 236.1158; found, 236.1159.

**1-azido-2-(3-phenylprop-2-ynyl)benzene (9d).** 51%

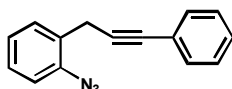

Colorless oil.

IR (neat/ $\text{cm}^{-1}$ ): 2954, 2121, 1589, 1489, 1288, 1072, 741.

$^1\text{H-NMR}$  (300 MHz,  $\text{CDCl}_3$ ,  $\delta$ ): 7.58 (d,  $J = 7.4$  Hz, 1H), 7.52–7.39 (m, 2H), 7.34–7.20 (m, 4H), 7.09 (dd,  $J = 7.7, 7.7$  Hz, 2H), 3.71 (s, 2H).

$^{13}\text{C-NMR}$  (75 MHz,  $\text{CDCl}_3$ ,  $\delta$ ): 137.53 (C), 131.59 ( $\text{CH} \times 2$ ), 129.55 (CH), 128.10 ( $\text{CH} \times 2$ ), 128.01 (CH), 127.92 (C), 127.79 (CH), 124.82 (CH), 123.52 (C), 117.75 (CH), 86.61 (C), 83.01 (C), 21.12 ( $\text{CH}_2$ ).

HRMS-ESI ( $m/z$ ):  $[\text{M}+\text{Na}]^+$  calcd for  $\text{C}_{15}\text{H}_{11}\text{N}_3\text{Na}$ , 256.0845; found 256.0842.

**(3-(2-Azidophenyl)prop-1-ynyl)(tert-butyl)dimethylsilane (9e).** 87%

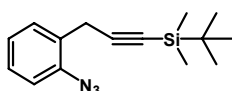

Yellow oil.

IR (neat/ $\text{cm}^{-1}$ ): 2129, 1643, 1265, 833, 741.

$^1\text{H-NMR}$  (500 MHz,  $\text{CDCl}_3$ ,  $\delta$ ): 7.57 (d,  $J = 7.6$  Hz, 1H), 7.29 (dd,  $J = 7.6, 7.6$  Hz, 1H), 7.14 (dd,  $J = 7.5, 7.5$  Hz, 1H), 7.12 (d,  $J = 7.7$  Hz, 1H), 3.57 (s, 2H), 0.95 (s, 9H), 0.13 (s, 6H).

$^{13}\text{C-NMR}$  (125 MHz,  $\text{CDCl}_3$ ,  $\delta$ ): 137.53 (C), 129.44 (CH), 127.97 (CH), 127.81 (C), 124.87 (CH), 117.74 (CH), 103.83 (C), 85.68 (C), 26.08 ( $\text{CH}_3 \times 3$ ), 21.64 ( $\text{CH}_2$ ), 16.57 (C), -4.48 ( $\text{CH}_3 \times 2$ ).

HRMS-ESI ( $m/z$ ):  $[\text{M}+\text{Na}]^+$  calcd for  $\text{C}_{15}\text{H}_{21}\text{N}_3\text{NaSi}$ , 294.1397; found, 294.1394.

**(3-(2-Azidophenyl)prop-1-ynyl)trimethylsilane (9f).** 58%

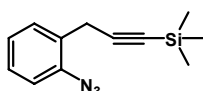

Yellow oil.

IR (neat/ $\text{cm}^{-1}$ ): 2962, 2129, 1265, 849, 741.

$^1\text{H-NMR}$  (500 MHz,  $\text{CDCl}_3$ ,  $\delta$ ): 7.54 (d,  $J = 7.6$  Hz, 1H), 7.29 (dd,  $J = 7.6, 7.6$  Hz, 1H), 7.14 (dd,  $J = 7.6, 7.6$  Hz, 1H), 7.12 (d,

$J = 7.6$  Hz, 1H), 3.56 (s, 2H), 0.19 (s, 9H).

$^{13}\text{C-NMR}$  (125 MHz,  $\text{CDCl}_3$ ,  $\delta$ ): 137.54 (C), 129.48 (CH), 128.01 (CH), 127.67 (C), 124.89 (CH), 117.77 (CH), 103.36 (C), 87.46 (C), 21.58 ( $\text{CH}_2$ ), 0.07 ( $\text{CH}_3 \times 3$ ).

HRMS-ESI ( $m/z$ ):  $[\text{M}+\text{H}]^+$  calcd for  $\text{C}_{12}\text{H}_{16}\text{N}_3\text{Si}$ , 230.1108; found, 230.1111.

**(3-(2-Azidophenyl)prop-1-ynyl)triethylsilane (9g).** 20%

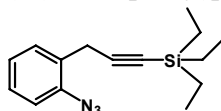

Yellow oil.

IR (neat/ $\text{cm}^{-1}$ ): 2952, 2120, 1254, 850, 746.

$^1\text{H-NMR}$  (500 MHz,  $\text{CDCl}_3$ ,  $\delta$ ): 7.59 (d,  $J = 7.7$  Hz, 1H), 7.29 (dd,  $J = 7.6, 7.6$  Hz, 1H), 7.14 (dd,  $J = 7.6, 7.6$  Hz, 1H), 7.12 (d,  $J = 7.7$  Hz, 1H), 3.58 (s, 2H), 1.01 (t,  $J = 7.9$  Hz, 9H), 0.62 (q,  $J = 7.9$  Hz, 6H).

$^{13}\text{C-NMR}$  (125 MHz,  $\text{CDCl}_3$ ,  $\delta$ ): 137.53 (C), 129.44 (CH), 127.95 (CH), 127.87 (C), 124.86 (CH), 117.72 (CH), 104.34 (C), 84.83 (C), 21.68 ( $\text{CH}_2$ ), 7.47 ( $\text{CH}_2 \times 3$ ), 4.50 ( $\text{CH}_3 \times 3$ ).

HRMS-ESI ( $m/z$ ):  $[\text{M}+\text{H}]^+$  calcd for  $\text{C}_{15}\text{H}_{22}\text{N}_3\text{Si}$ , 272.1578; found, 272.1575.

**1-Azido-2-(pent-3-yn-2-yl)benzene (10a).** 40%

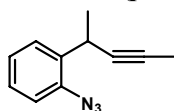

Yellow oil.

IR (neat/ $\text{cm}^{-1}$ ): 3054, 2121, 1265, 741.

$^1\text{H-NMR}$  (500 MHz,  $\text{CDCl}_3$ ,  $\delta$ ): 7.59 (dd,  $J = 1.5, 7.7$  Hz, 1H), 7.27 (ddd,  $J = 1.5, 7.7, 7.7$  Hz, 1H), 7.14 (ddd,  $J = 1.2, 7.7, 7.7$  Hz, 1H), 7.11 (dd,  $J = 1.2, 7.7$  Hz, 1H), 3.99 (dq,  $J = 2.3, 2.4$  Hz, 1H), 1.85 (d,  $J = 2.4$  Hz, 3H), 1.37 (d,  $J = 7.1$  Hz, 3H).

$^{13}\text{C-NMR}$  (125 MHz,  $\text{CDCl}_3$ ,  $\delta$ ): 136.57 (C), 135.23 (C), 128.40 (CH), 127.83 (CH), 125.02 (CH), 117.95 (CH), 81.58 (C), 77.25 (C), 26.62 ( $\text{CH}_3$ ), 23.36 (CH), 3.60 ( $\text{CH}_3$ ).

HRMS-ESI ( $m/z$ ):  $[\text{M}+\text{Na}]^+$  calcd for  $\text{C}_{11}\text{H}_{11}\text{N}_3\text{Na}$ , 208.0845; found, 208.0841.

**1-Azido-2-(1,4,4-trimethylpent-2-ynyl)benzene (10b).** 47%

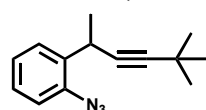

Yellow oil.

IR (neat/ $\text{cm}^{-1}$ ): 3055, 2970, 2129, 1265, 741.

$^1\text{H-NMR}$  (500 MHz,  $\text{CDCl}_3$ ,  $\delta$ ): 7.61 (dd,  $J = 1.3, 7.7$  Hz, 1H), 7.26 (ddd,  $J = 1.4, 7.6, 7.6$  Hz, 1H), 7.13 (ddd,  $J = 1.1, 7.5, 7.5$  Hz, 1H), 7.10 (dd,  $J = 1.1, 7.8$  Hz, 1H), 3.99 (q,  $J = 7.0$  Hz, 1H), 1.34 (d,  $J = 7.0$  Hz, 3H), 1.24 (d,  $J = 0.5$  Hz, 9H).

$^{13}\text{C-NMR}$  (125 MHz,  $\text{CDCl}_3$ ,  $\delta$ ): 136.55 (C), 135.64 (C), 128.43 (CH), 127.70 (CH), 124.99 (CH), 117.86 (CH), 90.88 (C), 80.77 (C), 31.33 ( $\text{CH}_3 \times 3$ ), 27.39 (C), 26.70 ( $\text{CH}_3$ ), 23.94 (CH).

HRMS-ESI ( $m/z$ ):  $[\text{M}+\text{Na}]^+$  calcd for  $\text{C}_{14}\text{H}_{17}\text{N}_3\text{Na}$ , 250.1315; found, 250.1307.

**1-Azido-2-(4-phenylbut-3-yn-2-yl)benzene (10c).** 35%

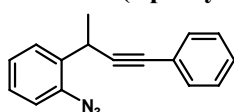

Yellow oil.

IR (neat/ $\text{cm}^{-1}$ ): 2978, 2129, 1581, 1489, 1296, 741.

$^1\text{H-NMR}$  (300 MHz,  $\text{CDCl}_3$ ,  $\delta$ ): 7.67 (d,  $J = 7.6$  Hz, 1H), 7.47–7.40 (m, 2H), 7.33–7.25 (m, 4H), 7.16 (dd,  $J = 7.7, 7.7$  Hz, 2H), 4.26 (q,  $J = 7.0$  Hz, 1H), 1.50 (d,  $J = 7.0$  Hz, 3H).

$^{13}\text{C}$ -NMR (125 MHz,  $\text{CDCl}_3$ ,  $\delta$ ): 136.66 (C), 134.59 (C), 131.63 (CH $\times$ 2), 128.52 (CH), 128.20 (CH $\times$ 2), 128.04 (CH), 127.79 (CH), 125.13 (CH), 123.62 (C), 118.03 (CH), 92.18 (C), 82.11 (C), 27.29 (CH), 23.25 (CH $_3$ )  
HRMS-ESI ( $m/z$ ):  $[\text{M}+\text{Na}]^+$  calcd for  $\text{C}_{16}\text{H}_{13}\text{N}_3\text{Na}$ , 270.1002; found, 270.1002.

**(3-(2-Azidophenyl)but-1-ynyl)(tert-butyl)dimethylsilane (10d).** 39%

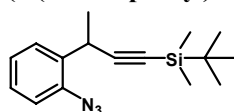

Yellow oil.

IR (neat/  $\text{cm}^{-1}$ ): 2931, 2121, 1458, 1288, 833, 771.

$^1\text{H}$ -NMR (600 MHz,  $\text{CDCl}_3$ ,  $\delta$ ): 7.61 (d,  $J=7.7$  Hz, 1H), 7.28 (dd,  $J=7.7, 7.7$  Hz, 1H), 7.14 (dd,  $J=7.7, 7.7$  Hz, 1H), 7.12 (d,  $J=8.0$  Hz, 1H), 4.07 (q,  $J=7.0$  Hz, 1H), 1.40 (d,  $J=7.1$  Hz, 3H), 0.95 (s, 9H), 0.11 (d,  $J=3.4$  Hz, 6H).

$^{13}\text{C}$ -NMR (150 MHz,  $\text{CDCl}_3$ ,  $\delta$ ): 136.59 (C), 134.42 (C), 128.45 (CH), 127.96 (CH), 125.05 (CH), 117.94 (CH), 109.62 (C), 84.27 (C), 27.78 (CH $_3$ ), 26.08 (CH $_3\times$ 3), 23.50 (CH), 16.59 (C), -4.49 (CH $_3\times$ 2).

HRMS-ESI ( $m/z$ ):  $[\text{M}+\text{Na}]^+$  calcd for  $\text{C}_{16}\text{H}_{23}\text{N}_3\text{NaSi}$ , 308.1553; found, 308.1560.

**Typical procedure for preparation of 11: 1-Azido-2-(2-methoxy-3-yn-2-yl)benzene (11a).**

A solution of azide alcohol **8a** (2.44 g, 12.1 mmol) in THF (5 mL) was added to a cold ( $-50$  °C) stirred suspension of 60% NaH (726 mg, 18.1 mmol) in THF (15 mL). After stirring for 10 min, methyl iodide (1.1 mL, 18.1 mmol) was added. The mixture was allowed to warm to room temperature, stirred for a further 3 h then quenched with water. The resulting mixture was extracted with dichloromethane, dried over anhydrous magnesium sulfate, and evaporated. The residue was purified by silica gel column chromatography (ethyl acetate/hexane = 1:4) to provide methyl ether **11a** as a yellow oil (2.30 g, 88%).

**1-Azido-2-(2-methoxy-3-yn-2-yl)benzene (11a).**

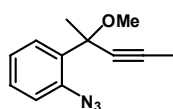

Yellow oil.

IR (neat/  $\text{cm}^{-1}$ ): 2931, 2121, 1481, 1296, 756.

$^1\text{H}$ -NMR (500 MHz,  $\text{CDCl}_3$ ,  $\delta$ ): 7.80(dd,  $J=1.5, 7.8$  Hz, 1H), 7.34(ddd,  $J=1.6, 7.8, 7.8$  Hz, 1H), 7.20 (dd,  $J=1.1, 7.9$  Hz, 1H), 7.13 (ddd,  $J=1.0, 7.6, 7.6$  Hz, 1H), 3.22 (s, 3H), 1.98 (s, 3H), 1.83 (s, 3H).

$^{13}\text{C}$ -NMR (125 MHz,  $\text{CDCl}_3$ ,  $\delta$ ): 137.18 (C), 132.55 (C), 129.64 (CH), 129.13 (CH), 124.39 (CH), 119.58 (CH), 83.39 (C), 79.30 (C), 76.26 (C), 52.18 (CH $_3$ ), 29.11 (CH $_3$ ), 3.63 (CH $_3$ ).

HRMS-ESI ( $m/z$ ):  $[\text{M}+\text{Na}]^+$  calcd for  $\text{C}_{12}\text{N}_3\text{NaO}$ , 238.0951; found, 238.0949.

**1-Azido-2-(2-methoxy-5,5-dimethylhex-3-yn-2-yl)benzene (11b).**

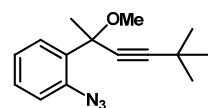

Yellow oil.

IR (neat/  $\text{cm}^{-1}$ ): 2970, 2121, 1473, 1219, 1126, 756.

$^1\text{H}$ -NMR (500 MHz,  $\text{CDCl}_3$ ,  $\delta$ ): 7.70 (dd,  $J=1.6, 7.8$  Hz, 1H), 7.34 (ddd,  $J=1.5, 7.6, 7.6$  Hz, 1H), 7.20 (dd,  $J=1.2, 7.9$  Hz, 1H), 7.13 (ddd,  $J=1.2, 7.6, 7.6$  Hz, 1H), 3.21 (s, 3H), 1.81 (s, 3H), 1.30 (s, 9H).

$^{13}\text{C}$ -NMR (125 MHz,  $\text{CDCl}_3$ ,  $\delta$ ): 137.33 (C), 133.02 (C), 129.57 (CH), 129.05 (CH), 124.40 (CH), 119.72 (CH), 96.49 (C), 78.59 (C), 76.10 (C), 52.11 (CH $_3$ ), 31.03 (CH $_3\times$ 3), 29.38 (CH $_3$ ), 27.57 (C).

HRMS-ESI ( $m/z$ ):  $[\text{M}+\text{Na}]^+$  calcd for  $\text{C}_{15}\text{H}_{19}\text{N}_3\text{NaO}$ , 280.1420; Found, 280.1413.

**Typical procedure for preparation of iminophosphoranes 12–14: 2-(But-2-ynyl)-N-(triphenylphosphonylidene)-**

### benzen-amine (12b).

Triphenylphosphine (228.7 mg, 0.82 mmol) was added to a solution of alkynyl azide **9b** (135.7 mg, 0.79 mmol) in dichloromethane (5 mL) at room temperature. After stirring for 10 h, the mixture was concentrated under reduced pressure. The residue was purified by silica gel column chromatography (ethyl acetate/hexane = 1:4) to give iminophosphorane **12b** (318.8 mg, 0.78 mmol, 99%) as a yellow solid.

### 2-(Oct-2-ynyl)-N-(triphenylphosphonylidene)benzenamine (12a). 87%

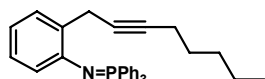

Yellow solid; mp: 78.6–80.3 °C.

IR (KBr/ cm<sup>-1</sup>): 2923, 1581, 1481, 1311.

<sup>1</sup>H NMR (500 MHz, CDCl<sub>3</sub>, δ): 7.74 (dd, *J* = 8.0, 11.5 Hz, 6H), 7.49 (dd, *J* = 7.4, 7.4 Hz, 3H), 7.45–7.35 (m, 7H), 6.78 (dd, *J* = 7.5, 7.5 Hz, 1H), 6.68 (dd, *J* = 7.2, 7.2 Hz, 1H), 6.42 (d, *J* = 7.6 Hz, 1H), 3.88 (s, 2H), 2.28–2.14 (m, 2H), 1.52 (tt, *J* = 7.0, 7.0 Hz, 2H), 1.44–1.23 (m, 4H), 0.87 (t, *J* = 7.2 Hz, 3H).

<sup>13</sup>C NMR (125 MHz, CDCl<sub>3</sub>, δ): 148.54 (C), 132.52 (CH×6, d, *J* = 9.6 Hz), 131.70 (C, d, *J* = 22.2 Hz), 131.62 (C×3, d, *J* = 99.8 Hz), 131.50 (CH×3, d, *J* = 2.6 Hz), 128.50 (CH×6, d, *J* = 11.6 Hz), 127.90 (CH), 126.35 (CH), 120.28 (CH, d, *J* = 10.3 Hz), 117.20 (CH), 82.11 (C), 79.33 (C), 31.15 (CH<sub>2</sub>), 28.96 (CH<sub>2</sub>), 22.34 (CH<sub>2</sub>), 22.23 (CH<sub>2</sub>), 18.98 (CH<sub>2</sub>), 13.98 (CH<sub>3</sub>).

HRMS-ESI (*m/z*): [M+H]<sup>+</sup> calcd for C<sub>32</sub>H<sub>33</sub>NP, 462.2345; found, 462.2349.

### 2-(But-2-ynyl)-N-(triphenylphosphonylidene)benzenamine (12b).

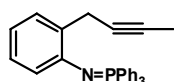

Yellow solid; mp: 139.6–141.0 °C.

IR (KBr/ cm<sup>-1</sup>): 3047, 1589, 1481, 1442, 1342, 1103, 748.

<sup>1</sup>H-NMR (300 MHz, CDCl<sub>3</sub>, δ): 7.84–7.68 (m, 6H), 7.55–7.35 (m, 10H), 6.78 (dd, *J* = 7.1, 7.1 Hz, 1H), 6.67 (dd, *J* = 7.1, 7.1 Hz, 1H), 6.49–6.38 (m, 1H), 3.85 (s, 2H), 1.83 (dd, *J* = 2.1, 2.1 Hz, 3H).

<sup>13</sup>C-NMR (75 MHz, CDCl<sub>3</sub>, δ): 148.54 (C), 132.49 (CH×6, d, *J* = 9.7 Hz), 131.63 (C×3, d, *J* = 100.0 Hz), 131.59 (C, d, *J* = 21.7 Hz), 131.50 (CH×3, d, *J* = 2.6 Hz), 128.49 (CH×6, d, *J* = 11.9 Hz), 127.92 (CH), 126.39 (CH), 120.36 (CH, d, *J* = 9.5 Hz), 117.23 (CH), 78.61 (C), 77.00 (C), 22.24 (CH<sub>2</sub>), 3.67 (CH<sub>3</sub>).

HRMS-ESI (*m/z*): [M+H]<sup>+</sup> calcd for C<sub>28</sub>H<sub>25</sub>NP, 406.1719; found, 406.1718.

Anal calcd for C<sub>28</sub>H<sub>24</sub>NP: C 82.94, H 5.97, N 3.45, found: C 82.56, H 6.05, N 3.43.

### 2-(4,4-Dimethylpent-2-ynyl)-N-(triphenylphosphonylidene)benzenamine (12c). 97%

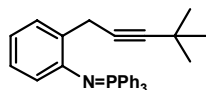

White solid; mp: 143–145 °C.

IR (KBr/ cm<sup>-1</sup>): 3054, 2962, 1897, 1589, 1481, 1349, 717.

<sup>1</sup>H NMR (500 MHz, CDCl<sub>3</sub>, δ): 7.69–7.79 (m, 6H), 7.36–7.52 (m, 10H), 6.77 (t, *J* = 7.31 Hz, 1H), 6.67 (t, *J* = 7.2 Hz, 1H), 6.41 (d, *J* = 8.3 Hz, 1H), 3.88 (s, 2H), 1.25 (s, 9H).

<sup>13</sup>C NMR (125 MHz, CDCl<sub>3</sub>, δ): 148.60 (C), 132.51 (CH×6, d, *J* = 9.5 Hz), 131.71 (C, d, *J* = 22.5 Hz), 131.57 (C×3, d, *J* = 99.8 Hz), 131.53 (CH×3), 128.51 (CH×6, d, *J* = 12.2 Hz), 127.70 (CH), 126.27 (CH), 120.10 (CH, d, *J* = 9.8 Hz), 117.08 (CH), 90.86 (C), 77.77 (C), 31.50 (CH<sub>3</sub>×3), 27.51 (C), 22.25 (CH<sub>2</sub>).

HRMS-ESI (*m/z*): [M+H]<sup>+</sup> calcd for C<sub>31</sub>H<sub>31</sub>NP, 448.2189; found, 448.2194.

### 2-(3-Phenylprop-2-ynyl)-N-(triphenylphosphonylidene)benzenamine (12d). 99%



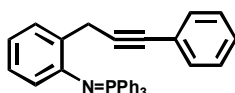

Brown solid; mp: 121.3–123.6 °C.

IR (KBr/ cm<sup>-1</sup>): 3055, 2222, 1589, 1481, 1442, 1349, 1111, 756.

<sup>1</sup>H-NMR (500 MHz, CDCl<sub>3</sub>, δ): 7.81–7.73 (m, 6H), 7.54–7.48 (m, 4H), 7.46–7.36 (m, 8H), 7.26–7.20 (m, 3H), 6.81 (ddd, *J* = 1.5, 7.4, 7.4 Hz, 1H), 6.67 (dd, *J* = 7.4, 7.4 Hz, 1H), 6.45 (d, *J* = 7.8 Hz, 1H), 4.12 (s, 2H).

<sup>13</sup>C-NMR (125 MHz, CDCl<sub>3</sub>, δ): 148.78 (C), 132.54 (CH×6, d, *J* = 9.3 Hz), 131.60 (CH×2), 131.56 (CH×3, d, *J* = 2.6 Hz), 131.51 (C, d, *J* = 99.6 Hz), 130.90 (C×3, d, *J* = 22.5 Hz), 128.55 (CH×6, d, *J* = 12.1 Hz), 128.17 (CH), 128.06 (CH×2), 127.23 (CH), 126.67 (CH), 124.48 (C), 120.42 (CH, d, *J* = 9.8 Hz), 117.26 (CH), 90.13 (C), 82.00 (C), 23.11 (CH<sub>2</sub>).

HRMS-ESI (*m/z*): [M+H]<sup>+</sup> calcd for C<sub>33</sub>H<sub>27</sub>NP, 468.1876; found, 468.1875.

Anal calcd for C<sub>33</sub>H<sub>26</sub>NP: C 84.77, H 5.61, N 3.00, found: C 84.37, H 5.95, N 2.93.

### 2-(3-(*tert*-Butyldimethylsilyl)prop-2-ynyl)-N-(triphenylphosphonylidene)benzenamine (12e). 94%

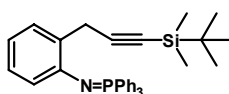

Yellow solid; mp: 159.9–160.3 °C.

IR (KBr/ cm<sup>-1</sup>): 3055, 2947, 2854, 2168, 1589, 1481, 1342, 1111, 1018, 833, 748.

<sup>1</sup>H-NMR (500 MHz, CDCl<sub>3</sub>, δ): 7.74 (dd, *J* = 9.4, 9.4 Hz, 6H), 7.60–7.33 (m, 10H), 6.79 (dd, *J* = 6.8, 6.8 Hz, 1H), 6.68 (dd, *J* = 6.6, 6.6 Hz, 1H), 6.41 (d, *J* = 6.9 Hz, 1H), 3.98 (s, 2H), 0.96 (s, 9H), 0.11 (s, 6H).

<sup>13</sup>C-NMR (125 MHz, CDCl<sub>3</sub>, δ): 148.61 (C), 132.49 (CH×6, d, *J* = 9.3 Hz), 131.54 (CH×3, d, *J* = 1.8 Hz), 131.47 (C×3, d, *J* = 99.6 Hz), 130.54 (C), 128.53 (CH×6, d, *J* = 11.9 Hz), 127.88 (CH), 126.50 (CH), 120.14 (CH, d, *J* = 10.1 Hz), 117.10 (CH), 107.48 (C), 84.07 (C), 26.19 (CH<sub>3</sub>×3), 23.53 (CH<sub>2</sub>), 16.59 (C), -4.29 (CH<sub>3</sub>×2).

HRMS-ESI (*m/z*): [M+H]<sup>+</sup> calcd for C<sub>33</sub>H<sub>37</sub>NPSi, 506.2427; found, 506.2424.

### 2-(3-(Trimethylsilyl)prop-2-ynyl)-N-(triphenylphosphonylidene)benzenamine (12f). 94%

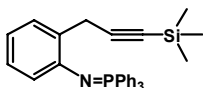

Yellow solid; mp: 105.6–107.3 °C.

IR (KBr/ cm<sup>-1</sup>): 3055, 2954, 2175, 1589, 1481, 1358, 1103, 841, 748, 694.

<sup>1</sup>H-NMR (500 MHz, CDCl<sub>3</sub>, δ): 7.78–7.72 (m, 6H), 7.51 (dd, *J* = 7.4 Hz, 3H), 7.46 (d, *J* = 7.5 Hz, 1H), 7.43 (dd, *J* = 7.4, 7.4 Hz, 6H), 6.79 (ddd, *J* = 1.2, 7.5, 7.5 Hz, 1H), 6.68 (dd, *J* = 7.4, 7.4 Hz, 1H), 6.41 (d, *J* = 7.7 Hz, 1H), 3.95 (s, 2H), 0.15 (s, 9H).

<sup>13</sup>C-NMR (125 MHz, CDCl<sub>3</sub>, δ): 148.68 (C), 132.53 (CH×6, d, *J* = 9.8 Hz), 131.55 (C×3, d, *J* = 2.6 Hz), 131.48 (C×3, d, *J* = 99.3 Hz), 130.45 (C, d, *J* = 22.5 Hz), 128.53 (CH×6, d, *J* = 12.4 Hz), 127.97 (CH, d, *J* = 2.1 Hz), 126.60 (CH), 120.28 (CH, d, *J* = 9.8 Hz), 117.18 (CH), 107.09 (C), 85.74 (C), 23.59 (CH<sub>2</sub>), 0.25 (CH<sub>3</sub>×3).

HRMS-ESI (*m/z*): [M+H]<sup>+</sup> calcd for C<sub>30</sub>H<sub>31</sub>NPSi, 464.1958; found, 464.1964.

### 2-(3-(Triethylsilyl)prop-2-ynyl)-N-(triphenylphosphonylidene)benzenamine (12g). 92%

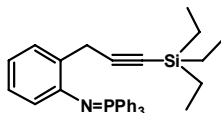

Yellow solid; mp: 96.3–99.5 °C.

IR (KBr/ cm<sup>-1</sup>): 2946, 2869, 2168, 1589, 1481, 1358, 1103, 1018, 709.

<sup>1</sup>H-NMR (500 MHz, CDCl<sub>3</sub>, δ): 7.78–7.71 (m, 6H), 7.56–7.47 (m, 4H), 7.46–7.39 (m, 6H), 6.79 (ddd, *J* = 1.3, 7.5, 7.5 Hz, 1H), 6.68 (dd, *J* = 7.4, 7.4 Hz, 1H), 6.41 (d, *J* = 7.7 Hz, 1H), 3.98 (s, 2H), 1.01 (t, *J* = 7.9 Hz, 9H), 0.61 (q, *J* = 7.9 Hz, 6H).

<sup>13</sup>C-NMR (125 MHz, CDCl<sub>3</sub>, δ): 132.51 (CH×6, d, *J* = 9.6 Hz), 131.57 (CH×3, d, *J* = 1.6 Hz), 131.48 (C×3, d, *J* = 96.7 Hz),

130.69 (C), 130.52 (C), 128.56 (CH×6, d,  $J = 12.4$  Hz), 127.88 (CH, d,  $J = 1.6$  Hz), 126.48 (CH), 120.20 (CH), 117.17 (CH), 107.91 (C), 83.33(C), 23.54 (CH<sub>2</sub>), 7.55 (CH<sub>2</sub>×3), 4.66 (CH<sub>3</sub>×3).

HRMS-ESI ( $m/z$ ):  $[M+H]^+$  calcd for C<sub>33</sub>H<sub>37</sub>NPSi, 506.2427; found, 506.2427.

**2-(Pent-3-yn-2-yl)-*N*-(triphenylphosphonylidene)benzenamine (13a).** 99%

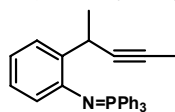

Yellow solid; mp: 144.0–144.3 °C.

IR (KBr/ cm<sup>-1</sup>): 3062, 2916, 1589, 1481, 1350, 1103, 694.

<sup>1</sup>H-NMR (500 MHz, CDCl<sub>3</sub>,  $\delta$ ): 7.80–7.67 (m, 6H), 7.55–7.47 (m, 4H), 7.45–7.35 (m, 6H), 6.79–6.72 (m, 1H), 6.70–6.64 (m, 1H), 6.45–6.37 (m, 1H), 4.81–4.69 (m, 1H), 1.85 (dd,  $J = 2.4, 2.4$  Hz, 3H), 1.49 (s, 3H).

<sup>13</sup>C-NMR (125 MHz, CDCl<sub>3</sub>,  $\delta$ ): 147.61 (C), 137.78 (C, d,  $J = 22.0$  Hz), 132.48 (CH×6, d,  $J = 9.31$  Hz), 131.63 (C×3, d,  $J = 99.3$  Hz), 131.47 (CH×3, d,  $J = 2.6$  Hz), 128.50 (CH×6, d,  $J = 12.2$  Hz), 126.84 (CH), 126.36 (CH), 120.73 (CH, d,  $J = 10.1$  Hz), 117.32 (CH), 84.26 (C), 75.87 (C), 27.42 (CH<sub>3</sub>), 22.89 (CH), 3.70 (CH<sub>3</sub>).

HRMS-ESI ( $m/z$ ):  $[M+H]^+$  calcd for C<sub>29</sub>H<sub>27</sub>NP, 420.1876; found, 420.1867.

**2-(5,5-Dimethylhex-3-yn-2-yl)-*N*-(triphenylphosphonylidene)benzenamine (13b).** 66%

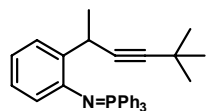

Yellow solid; mp: 162.8–163.0 °C.

IR (KBr/cm<sup>-1</sup>): 3055, 2962, 1589, 1481, 1350, 1110, 1018, 748.

<sup>1</sup>H-NMR (500 MHz, CDCl<sub>3</sub>,  $\delta$ ): 7.80–7.69 (m, 6H), 7.56–7.47 (m, 4H), 7.47–7.38 (m, 6H), 6.76 (dd,  $J = 7.7, 7.4$  Hz, 1H), 6.68 (dd,  $J = 7.3, 7.3$  Hz, 1H), 6.39 (d,  $J = 7.9$  Hz, 1H), 4.72 (q,  $J = 7.0$  Hz, 1H), 1.49 (d,  $J = 6.9$  Hz, 3H), 1.26 (s, 9H).

<sup>13</sup>C-NMR (125 MHz, CDCl<sub>3</sub>,  $\delta$ ): 147.62 (C), 138.03 (C), 132.50 (CH×6, d,  $J = 9.8$  Hz), 131.60 (C×3, d,  $J = 99.6$  Hz), 131.47 (CH×3,  $J = 2.6$  Hz), 128.51 (CH×6,  $J = 12.2$  Hz), 126.88 (CH), 126.25 (CH), 126.58 (CH,  $J = 10.4$  Hz), 117.19 (CH), 89.76 (C), 83.39 (C), 31.59 (CH<sub>3</sub>×3), 27.49 (CH), 27.45 (C), 23.25 (CH<sub>3</sub>).

HRMS-ESI ( $m/z$ ):  $[M+H]^+$  calcd for C<sub>32</sub>H<sub>33</sub>NP, 462.2345; found, 462.2350.

**2-(4-Phenylbut-3-yn-2-yl)-*N*-(triphenylphosphonylidene)benzenamine (13c).** 98%

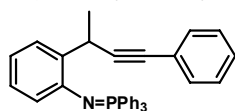

Yellow solid; mp: 56.2–56.7 °C.

IR (KBr/ cm<sup>-1</sup>): 3055, 2970, 2222, 1589, 1481, 1342, 1111, 748.

<sup>1</sup>H-NMR (500 MHz, CDCl<sub>3</sub>,  $\delta$ ): 7.86–7.15 (m, 21H), 6.73 (d,  $J = 4.3$  Hz, 2H), 6.44 (s, 1H), 5.01 (s, 1H), 1.63 (s, 3H)

<sup>13</sup>C-NMR (125 MHz, CDCl<sub>3</sub>,  $\delta$ ): 147.77 (C), 137.06 (C, d,  $J = 22.5$  Hz), 132.46 (CH×6, d,  $J = 9.3$  Hz), 131.55 (CH×3, d,  $J = 7.2$ ), 131.52 (CH×2), 131.46 (C×3, d,  $J = 99.3$  Hz), 128.53 (CH×6, d,  $J = 11.9$  Hz), 128.02 (CH×2), 127.15 (CH), 126.94 (CH), 126.57 (CH), 124.52 (C), 120.74 (CH, d,  $J = 10.1$  Hz), 117.35 (CH), 95.43 (C), 81.09 (C), 28.11 (CH), 25.56 (CH<sub>3</sub>).

HRMS-ESI ( $m/z$ ):  $[M+H]^+$  calcd for C<sub>34</sub>H<sub>29</sub>NP, 482.2032; found, 482.2032.

**2-(4-(*tert*-Butyldimethylsilyl)but-3-yn-2-yl)-*N*-(triphenylphosphonylidene)benzenamine (13d).** 80%

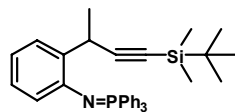

Yellow solid; mp: 45.2–46.0 °C.

IR (KBr/ cm<sup>-1</sup>): 3055, 2954, 2854, 2160, 1589, 1481, 1350, 1111, 833, 687.

<sup>1</sup>H-NMR (600 MHz, CDCl<sub>3</sub>,  $\delta$ ): 7.82–7.73 (m, 6H), 7.62–7.57 (m, 1H), 7.53–7.49 (m, 3H), 7.47–7.41 (m, 6H), 6.79 (dd,  $J =$

7.5, 7.5 Hz, 1H), 6.71 (dd,  $J = 7.4, 7.4$  Hz, 1H), 6.49 (d,  $J = 7.8$  Hz, 1H), 4.90–4.83 (m, 1H), 1.58 (d,  $J = 6.8$  Hz, 3H), 1.01 (s, 9H), 0.15 (s, 6H).

$^{13}\text{C}$ -NMR (150 MHz,  $\text{CDCl}_3$ ,  $\delta$ ): 147.62 (C), 136.90 (C, d,  $J = 22.2$  Hz), 132.43 (CH $\times$ 6, d,  $J = 9.6$  Hz), 131.52 (CH $\times$ 3, d,  $J = 2.7$  Hz), 131.40 (C $\times$ 3, d,  $J = 100.2$  Hz), 128.52 (CH $\times$ 6, d,  $J = 12.1$  Hz), 126.92 (CH), 126.47 (CH), 120.60 (CH, d,  $J = 10.2$  Hz), 117.25 (CH), 113.05 (C), 82.62 (C), 28.64 (CH), 26.20 (CH $_3$  $\times$ 3), 22.92 (CH $_3$ ), 16.64 (C), -4.28 (CH $_3$  $\times$ 2).

HRMS-ESI ( $m/z$ ):  $[\text{M}+\text{H}]^+$  calcd for  $\text{C}_{34}\text{H}_{39}\text{NPSi}$ , 520.2584; found, 520.2592.

### 2-(2-Methoxy-3-yn-2-yl)-*N*-(triphenylphosphonylidene)benzenamine (14a).

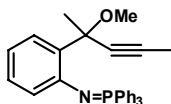

Yellow solid; mp: 140.9–141.3 C.

IR (KBr/ $\text{cm}^{-1}$ ): 3055, 2977, 2931, 2245, 1913, 1581, 1473, 1342, 1111, 741.

$^1\text{H}$ -NMR (500 MHz,  $\text{CDCl}_3$ ,  $\delta$ ): 7.91–7.80 (m, 6H), 7.65–7.59 (m, 1H), 7.50–7.36 (m, 9H), 6.84–6.77 (m, 1H), 6.67–6.60 (m, 1H), 6.46–6.40 (m, 1H), 3.37 (s, 3H), 2.09 (s, 3H), 1.70 (s, 3H).

$^{13}\text{C}$ -NMR (125 MHz,  $\text{CDCl}_3$ ,  $\delta$ ): 134.11 (C, d,  $J = 22.2$ ), 132.57 (CH $\times$ 6, d,  $J = 9.8$  Hz), 132.00 (C, d,  $J = 9.8$  Hz), 131.80 (C $\times$ 3, d,  $J = 99.8$  Hz), 131.28 (CH $\times$ 3), 128.39 (CH $\times$ 6, d,  $J = 11.9$  Hz), 127.49 (CH), 127.47 (CH), 122.29 (CH, d,  $J = 11.6$  Hz), 116.29 (CH), 81.72 (C), 80.46 (C), 77.07 (C), 51.80 (CH $_3$ ), 27.56 (CH $_3$ ), 3.55 (CH $_3$ ).

HRMS-ESI ( $m/z$ ):  $[\text{M}+\text{H}]^+$  calcd for  $\text{C}_{30}\text{H}_{29}\text{NOP}$ , 450.1981; found, 450.1986.

### 2-(2-Methoxy-5,5-dimethylhex-3-yn-2-yl)-*N*-(triphenylphosphonylidene)benzenamine (14b).

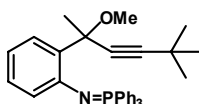

Yellow solid; mp: 94.9–96.0 °C.

IR (KBr/ $\text{cm}^{-1}$ ): 3055, 2970, 1589, 1473, 1442, 1342, 1111, 856, 748, 717.

$^1\text{H}$ -NMR (500 MHz,  $\text{CDCl}_3$ ,  $\delta$ ): 7.88–7.82 (m, 6H), 7.63 (ddd,  $J = 2.0, 2.0, 7.0$  Hz, 1H), 7.52–7.47 (m, 3H), 7.46–7.40 (m, 6H), 6.80 (ddd,  $J = 1.6, 7.5, 7.5$  Hz, 1H), 6.63 (dd,  $J = 7.5, 7.5$  Hz, 1H), 6.40 (d,  $J = 7.7$  Hz, 1H), 3.33 (s, 3H), 2.07 (s, 3H), 1.16 (d,  $J = 0.5$  Hz, 9H).

$^{13}\text{C}$ -NMR (125 MHz,  $\text{CDCl}_3$ ,  $\delta$ ): 135.96 (C), 133.95 (C), 132.74 (CH $\times$ 6, d,  $J = 10.3$  Hz), 131.78 (C $\times$ 3, d,  $J = 99.6$  Hz), 131.35 (CH), 131.33 (CH $\times$ 3,  $J = 2.3$  Hz), 128.46 (CH $\times$ 6,  $J = 12.4$  Hz), 127.96 (CH), 127.51 (CH), 116.11 (CH), 100.56 (C), 93.50 (C), 77.34 (C), 51.77 (CH $_3$ ), 31.18 (CH $_3$  $\times$ 3), 27.76 (CH $_3$ ), 27.46 (C).

HRMS-ESI ( $m/z$ ):  $[\text{M}+\text{H}]^+$  calcd for  $\text{C}_{33}\text{H}_{35}\text{NOP}$ , 492.2451; Found, 492.2450.

### Typical procedure for preparation of carbodiimides 4, 5, and 6: (2-But-2-ynyl)propylcarbodiimide (4e).

Propyl isocyanate (0.16 mL, 1.66 mmol) was added to a solution of iminophosphorane **12b** (446.0 mg, 1.10 mmol) in dichloromethane (5 mL) at room temperature. After stirring for 10 h, the mixture was concentrated under reduced pressure. The residue was purified by silica gel column chromatography (ethyl acetate/hexane = 1:4) to give carbodiimide **4e** (220.3 mg, 1.03 mmol, 94%) as a colorless oil.

### (2-Oct-2-ynylphenyl)propylcarbodiimide (4a). 95%

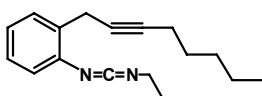

Colorless oil.

IR (neat/ $\text{cm}^{-1}$ ): 2314, 2136, 1265, 740.

$^1\text{H}$ -NMR (500 MHz,  $\text{CDCl}_3$ ,  $\delta$ ): 7.52 (d,  $J = 7.6$  Hz, 1H), 7.17 (d,  $J = 7.6$  Hz, 1H), 7.14–7.07 (m, 2H), 3.60 (dd,  $J = 2.3, 2.3$  Hz,

2H), 3.38 (t,  $J = 6.8$  Hz, 2H), 2.22 (tt,  $J = 2.4, 7.2$  Hz, 2H), 1.70 (tq,  $J = 7.1, 7.4$  Hz, 2H), 1.53 (tq,  $J = 7.2, 7.6$  Hz, 2H), 1.42–1.28 (m, 4H), 1.01 (t,  $J = 7.4$  Hz, 3H), 0.90 (t,  $J = 7.2$  Hz, 3H).

$^{13}\text{C}$ -NMR (125 MHz,  $\text{CDCl}_3$ ,  $\delta$ ): 138.36 (C), 135.31 (C), 131.30 (C), 129.01 (CH), 127.37 (CH), 124.58 (CH), 123.57 (CH), 82.86 (C), 77.18 (C), 48.59 ( $\text{CH}_2$ ), 31.13 ( $\text{CH}_2$ ), 28.76 ( $\text{CH}_2$ ), 24.73 ( $\text{CH}_2$ ), 22.22 ( $\text{CH}_2$ ), 21.27 ( $\text{CH}_2$ ), 18.86 ( $\text{CH}_2$ ), 14.00 ( $\text{CH}_3$ ), 11.45 ( $\text{CH}_3$ ).

HRMS-ESI ( $m/z$ ):  $[\text{M}+\text{Na}]^+$  calcd for  $\text{C}_{18}\text{H}_{24}\text{N}_2\text{Na}$ , 291.1832; found, 291.1842.

**Benzyl-(2-oct-2-ynylphenyl)carbodiimide (4b).** 67%

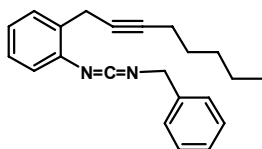

Colorless oil.

IR (neat/  $\text{cm}^{-1}$ ): 2931, 2137, 1219, 771.

$^1\text{H}$ -NMR (500 MHz,  $\text{CDCl}_3$ ,  $\delta$ ): 7.50 (d,  $J = 7.3$  Hz, 1H), 7.39–7.34 (m, 4H), 7.33–7.28 (m, 1H), 7.12 (dddd,  $J = 1.7, 7.4, 7.4, 7.4$  Hz, 1H), 7.09 (dddd,  $J = 1.4, 7.5, 7.5, 7.5$  Hz, 1H), 6.97 (dd,  $J = 1.5, 7.5$  Hz, 1H), 4.56 (s, 2H), 3.54 (t,  $J = 2.4$  Hz, 2H), 2.21 (tt,  $J = 2.4, 7.1$  Hz, 2H), 1.53 (tt,  $J = 7.4, 7.4$  Hz, 2H), 1.42–1.28 (m, 4H), 0.90 (t,  $J = 7.2$  Hz, 3H).

$^{13}\text{C}$ -NMR (125 MHz,  $\text{CDCl}_3$ ,  $\delta$ ): 137.85 (C), 137.60 (C), 136.46 (C), 131.38 (C), 128.98 (CH), 128.76 ( $\text{CH}\times 2$ ), 127.77 (CH), 127.37 ( $\text{CH}\times 3$ ), 124.90 (CH), 123.86 (CH), 82.94 (C), 77.02 (C), 50.47 ( $\text{CH}_2$ ), 31.11 ( $\text{CH}_2$ ), 28.73 ( $\text{CH}_2$ ), 22.21 ( $\text{CH}_2$ ), 21.29 ( $\text{CH}_2$ ), 18.84 ( $\text{CH}_2$ ), 13.99 ( $\text{CH}_3$ ).

HRMS-ESI ( $m/z$ ):  $[\text{M}+\text{Na}]^+$  calcd for  $\text{C}_{22}\text{H}_{24}\text{N}_2\text{Na}$ , 339.1832; found, 339.1830.

**Cyclohexyl-(2-oct-2-ynylphenyl)carbodiimide (4c).** 85%

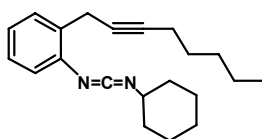

Colorless oil.

IR (neat/  $\text{cm}^{-1}$ ): 2854, 2129, 1643, 1265, 741.

$^1\text{H}$ -NMR (600 MHz,  $\text{CDCl}_3$ ,  $\delta$ ): 7.53 (d,  $J = 7.6$  Hz, 1H), 7.18 (ddd,  $J = 1.5, 7.5, 7.5$  Hz, 1H), 7.13 (dd,  $J = 1.3, 7.7$  Hz, 1H), 7.10 (ddd,  $J = 1.5, 7.5, 7.5$  Hz, 1H), 3.60 (dd,  $J = 2.4, 2.4$  Hz, 2H), 3.50–3.44 (m, 1H), 2.22 (tt,  $J = 2.4, 7.2$  Hz, 2H), 2.04–1.97 (m, 2H), 1.80–1.74 (m, 2H), 1.60–1.44 (m, 6H), 1.41–1.30 (m, 6H), 0.90 (t,  $J = 7.3$  Hz, 3H).

$^{13}\text{C}$ -NMR (150 MHz,  $\text{CDCl}_3$ ,  $\delta$ ): 138.55 (C), 135.48 (C), 131.25 (C), 128.98 (CH), 127.37 (CH), 124.53 (CH), 123.34 (CH), 82.84 (C), 77.21 (C), 56.58 (CH), 34.93 ( $\text{CH}_2\times 2$ ), 31.12 ( $\text{CH}_2$ ), 28.76 ( $\text{CH}_2$ ), 25.32 ( $\text{CH}_2\times 2$ ), 24.39 ( $\text{CH}_2$ ), 22.22 ( $\text{CH}_2$ ), 21.23 ( $\text{CH}_2$ ), 18.86 ( $\text{CH}_2$ ), 14.00 ( $\text{CH}_3$ ).

HRMS-ESI ( $m/z$ ):  $[\text{M}+\text{Na}]^+$  calcd for  $\text{C}_{21}\text{H}_{28}\text{N}_2\text{Na}$ , 331.2145; found, 331.2150.

**(2-Oct-2-ynylphenyl)phenylcarbodiimide (4d).** 83%

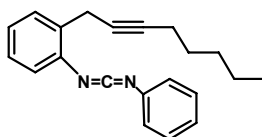

Colorless oil.

IR (neat/  $\text{cm}^{-1}$ ): 2924, 2144, 1643, 1265, 741.

$^1\text{H}$ -NMR (500 MHz,  $\text{CDCl}_3$ ,  $\delta$ ): 7.55 (d,  $J = 7.6$  Hz, 1H), 7.35–7.30 (m, 2H), 7.22–7.14 (m, 6H), 3.67 (dd,  $J = 2.3, 2.3$  Hz, 2H), 2.21 (tt,  $J = 2.4, 7.2$  Hz, 2H), 1.52 (tq,  $J = 7.4, 7.4$  Hz, 2H), 1.42–1.28 (m, 4H), 0.90 (t,  $J = 7.2$  Hz, 3H).

$^{13}\text{C}$ -NMR (125 MHz,  $\text{CDCl}_3$ ,  $\delta$ ): 138.62 (C), 136.13 (C), 131.86 (C), 129.48 ( $\text{CH}\times 2$ ), 129.28 (CH), 127.63 (CH), 125.73 (CH), 125.60 (C), 125.43 (CH), 124.64 (CH), 124.12 ( $\text{CH}\times 2$ ), 83.21 (C), 76.75 (C), 31.13 ( $\text{CH}_2$ ), 28.71 ( $\text{CH}_2$ ), 22.22 ( $\text{CH}_2$ ), 21.67 ( $\text{CH}_2$ ), 18.85 ( $\text{CH}_2$ ), 14.00 ( $\text{CH}_3$ ).

HRMS-ESI ( $m/z$ ):  $[M+H]^+$  calcd for  $C_{21}H_{23}N_2$ , 303.1856; found, 303.1858.

**(2-But-2-ynyl)propylcarbodiimide (4e).** 94%

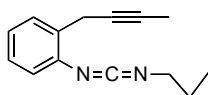

Colorless oil.

IR (neat/  $cm^{-1}$ ): 2970, 2877, 2144, 1496, 1265, 1088, 740.

$^1H$ -NMR (300 MHz,  $CDCl_3$ ,  $\delta$ ): 7.49 (d,  $J = 7.4$  Hz, 1H), 7.25–7.04 (m, 3H), 3.61–3.54 (m, 2H), 3.36 (t,  $J = 6.8$  Hz, 2H), 1.84 (dd,  $J = 2.6, 2.6$  Hz, 3H), 1.69 (tq,  $J = 7.1, 7.1$  Hz, 2H), 1.00 (t,  $J = 7.3$  Hz, 3H).

$^{13}C$ -NMR (75 MHz,  $CDCl_3$ ,  $\delta$ ): 138.33 (C), 135.20 (C), 131.11 (C), 129.02 (CH), 127.38 (CH), 124.52 (CH), 123.54 (CH), 77.75 (C), 76.38 (C), 48.48 ( $CH_2$ ), 24.65 ( $CH_2$ ), 21.17 ( $CH_2$ ), 11.37 ( $CH_3$ ), 3.56 ( $CH_3$ ).

HRMS-ESI ( $m/z$ ):  $[M+H]^+$  calcd for  $C_{14}H_{17}N_2$ , 213.1386; found, 213.1385.

**Benzyl-((2-but-2-ynyl)phenyl)carbodiimide (4f).** 85%

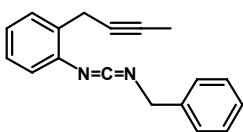

Colorless oil.

IR (neat/  $cm^{-1}$ ): 3055, 2923, 2136, 1589, 1496, 1450, 1265, 746.

$^1H$ -NMR (600 MHz,  $CDCl_3$ ,  $\delta$ ): 7.47 (d,  $J = 7.2$  Hz, 1H), 7.37 (d,  $J = 4.4$  Hz, 4H), 7.31 (dt,  $J = 4.0, 4.4$  Hz, 1H), 7.13 (ddd,  $J = 1.4, 7.3, 7.3$  Hz, 1H), 7.08 (ddd,  $J = 1.3, 7.4, 7.4$  Hz, 1H), 6.97 (d,  $J = 7.6$  Hz, 1H), 4.57 (s, 2H), 3.51 (dd,  $J = 2.5, 5.0$  Hz, 2H), 1.84 (t,  $J = 2.5$  Hz, 3H).

$^{13}C$ -NMR (150 MHz,  $CDCl_3$ ,  $\delta$ ): 137.86 (C), 137.65 (C), 136.46 (C), 131.28 (C), 129.08 (CH), 128.77 ( $CH \times 2$ ), 127.78 (CH), 127.46 (CH), 127.38 ( $CH \times 2$ ), 124.94 (CH), 123.93 (CH), 77.92 (C), 76.31 (C), 50.47 ( $CH_2$ ), 21.26 ( $CH_2$ ), 3.64 ( $CH_3$ ).

HRMS-ESI ( $m/z$ ):  $[M+Na]^+$  calcd for  $C_{18}H_{16}N_2Na$ , 283.1206; found, 283.1207.

**((2-But-2-ynyl)phenyl)cyclohexylcarbodiimide (4g).** 74%

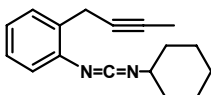

Colorless oil.

IR (neat/  $cm^{-1}$ ): 2931, 2306, 2129, 1736, 1265, 741.

$^1H$ -NMR (600 MHz,  $CDCl_3$ ,  $\delta$ ): 7.50 (d,  $J = 7.5$  Hz, 1H), 7.18 (dd,  $J = 7.8, 7.8$  Hz, 1H), 7.13 (dd,  $J = 1.2, 7.8$  Hz, 1H), 7.09 (ddd,  $J = 1.1, 7.5, 7.5$  Hz, 1H), 3.57 (dd,  $J = 2.4, 5.0$  Hz, 2H), 3.52–3.42 (m, 1H), 2.06–1.97 (m, 2H), 1.86 (dd,  $J = 2.6, 2.6$  Hz, 3H), 1.81–1.73 (m, 2H), 1.60–1.54 (m, 1H), 1.53–1.44 (m, 2H), 1.38–1.30 (m, 2H), 1.30–1.21 (m, 1H).

$^{13}C$ -NMR (150 MHz,  $CDCl_3$ ,  $\delta$ ): 138.57 (C), 135.48 (C), 131.14 (C), 129.06 (CH), 127.44 (CH), 124.56 (CH), 123.40 (CH), 77.82 (C), 76.49 (C), 56.58 (CH), 34.94 ( $CH_2 \times 2$ ), 25.32 ( $CH_2 \times 2$ ), 24.38 ( $CH_2$ ), 21.21 ( $CH_2$ ), 3.65 ( $CH_3$ ).

HRMS-ESI ( $m/z$ ):  $[M+Na]^+$  calcd for  $C_{17}H_{20}N_2Na$ , 275.1519; found, 275.1521.

**((2-But-2-ynyl)phenyl)phenylcarbodiimide (4h).** 71%

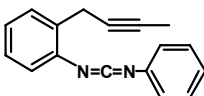

Colorless oil.

IR (neat/  $cm^{-1}$ ): 2924, 2144, 1643, 910, 733.

$^1H$ -NMR (500 MHz,  $CDCl_3$ ,  $\delta$ ): 7.53 (d,  $J = 7.5$  Hz, 1H), 7.37–7.29 (m, 2H), 7.24–7.14 (m, 6H), 3.64 (dd,  $J = 2.5, 5.1$  Hz, 2H), 1.84 (dd,  $J = 2.6, 2.6$  Hz, 3H).

$^{13}\text{C}$ -NMR (125 MHz,  $\text{CDCl}_3$ ,  $\delta$ ): 138.57 (C), 136.15 (C), 134.34 (C), 131.74 (C), 129.47 (CH $\times$ 2), 129.34 (CH), 127.71 (CH), 125.75 (CH), 125.44 (CH), 124.70 (CH), 124.12 (CH $\times$ 2), 78.22 (C), 76.03 (C), 21.64 (CH $_2$ ), 3.62 (CH $_3$ ).  
HRMS-ESI ( $m/z$ ):  $[\text{M}+\text{H}]^+$  calcd for  $\text{C}_{17}\text{H}_{15}\text{N}_2$ , 247.1230; found, 247.1224.

**(2-(4,4-Dimethylpent-2-ynyl)phenyl)propylcarbodiimide (4i).** 92%

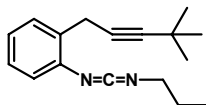

Yellow oil.

IR (neat/  $\text{cm}^{-1}$ ): 2970, 2137, 1643, 910, 733.

$^1\text{H}$ -NMR (600 MHz,  $\text{CDCl}_3$ ,  $\delta$ ): 7.54 (d,  $J$  = 8.0 Hz, 1H), 7.16 (dd,  $J$  = 7.6, 7.6 Hz, 1H), 7.13–7.06 (m, 2H), 3.59 (s, 2H), 3.55 (t,  $J$  = 6.8 Hz, 2H), 1.68 (tq,  $J$  = 6.8, 7.2 Hz, 2H), 1.25 (s, 9H), 1.00 (dt,  $J$  = 7.4, 1.5 Hz, 3H).

$^{13}\text{C}$ -NMR (150 MHz,  $\text{CDCl}_3$ ,  $\delta$ ): 138.28 (C), 135.25 (C), 131.26 (C), 128.73 (CH), 127.22 (CH), 124.50 (CH), 123.40 (CH), 91.53 (C), 75.53 (C), 48.49 (CH $_2$ ), 31.28 (CH $_3\times$ 3), 27.45 (C), 24.69 (CH $_2$ ), 21.04 (CH $_2$ ), 11.39 (CH $_3$ ).

HRMS-ESI ( $m/z$ ):  $[\text{M}+\text{Na}]^+$  calcd for  $\text{C}_{17}\text{H}_{22}\text{N}_2\text{Na}$ , 277.1675; found, 277.1680.

**Benzyl-(2-(4,4-dimethylpent-2-ynyl)phenyl)carbodiimide (4j).** 88%

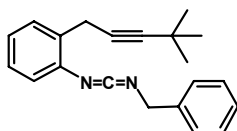

Colorless oil.

IR (neat/  $\text{cm}^{-1}$ ): 2970, 2137, 1705, 1450, 1265, 756.

$^1\text{H}$ -NMR (500 MHz,  $\text{CDCl}_3$ ,  $\delta$ ): 7.52 (d,  $J$  = 7.1 Hz, 1H), 7.40–7.35 (m, 4H), 7.34–7.29 (m, 1H), 7.12 (ddt,  $J$  = 1.6, 7.3, 7.3 Hz, 1H), 7.10 (ddt,  $J$  = 1.6, 7.3, 7.3 Hz, 1H), 6.96 (dd,  $J$  = 1.6, 7.3 Hz, 1H), 4.57 (s, 2H), 3.53 (s, 2H), 1.25 (s, 9H).

$^{13}\text{C}$ -NMR (125 MHz,  $\text{CDCl}_3$ ,  $\delta$ ): 137.87 (C), 137.57 (C), 136.49 (C), 131.44 (C), 128.78 (CH $\times$ 3), 127.79 (CH), 127.40 (CH $\times$ 2), 127.28 (CH), 124.90 (CH), 123.76 (CH), 91.72 (C), 75.41 (C), 50.50 (CH $_2$ ), 31.32 (CH $_3\times$ 3), 27.50 (C), 21.12 (CH $_2$ ).

HRMS-ESI ( $m/z$ ):  $[\text{M}+\text{Na}]^+$  calcd for  $\text{C}_{21}\text{H}_{22}\text{N}_2\text{Na}$ , 325.1675; found, 325.1675.

**Cyclohexyl-(2-(4,4-dimethylpent-2-ynyl)phenyl)carbodiimide (4k).** 70%

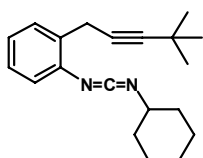

Colorless oil.

IR (neat/  $\text{cm}^{-1}$ ): 2931, 2129, 1666, 1265, 741.

$^1\text{H}$ -NMR (500 MHz,  $\text{CDCl}_3$ ,  $\delta$ ): 7.54 (dd,  $J$  = 0.8, 7.6 Hz, 1H), 7.17 (dd,  $J$  = 7.6, 7.6 Hz, 1H), 7.12 (dd,  $J$  = 1.4, 7.6 Hz, 1H), 7.10 (ddd,  $J$  = 1.3, 7.6, 7.6 Hz, 1H), 3.59 (s, 2H), 3.47 (tt, 7.12  $J$  = 3.9, 9.7 Hz, 1H), 2.04–1.96 (m, 2H), 1.81–1.72 (m, 2H), 1.52–1.43 (m, 2H), 1.39–1.23 (m, 4H), 1.26 (s, 9H).

$^{13}\text{C}$ -NMR (125 MHz,  $\text{CDCl}_3$ ,  $\delta$ ): 138.52 (C), 135.49 (C), 131.32 (C), 128.77 (CH), 127.26 (CH), 124.51 (CH), 123.24 (CH), 91.63 (C), 75.61 (C), 56.56 (CH), 34.44 (CH $_2\times$ 2), 31.34 (CH $_3\times$ 3), 25.34 (C), 24.38 (CH $_2\times$ 2), 21.07 (CH $_2$ ), 21.07 (CH $_2$ ).

HRMS-ESI ( $m/z$ ):  $[\text{M}+\text{Na}]^+$  calcd for  $\text{C}_{20}\text{H}_{26}\text{N}_2\text{Na}$ , 317.1988; found, 317.1985.

**(2-(4,4-Dimethylpent-2-ynyl)phenyl)phenylcarbodiimide (4l).** 78%

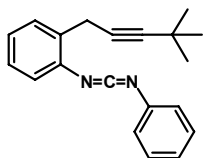

Colorless oil.

IR (neat/  $\text{cm}^{-1}$ ): 2931, 2144, 1589, 1265, 1211, 748.

$^1\text{H-NMR}$  (600 MHz,  $\text{CDCl}_3$ ,  $\delta$ ): 7.58 (d,  $J=7.1$  Hz, 1H), 7.35–7.30 (m, 2H), 7.22–7.15 (m, 6H), 3.67 (s, 2H), 1.26 (s, 9H).

$^{13}\text{C-NMR}$  (150 MHz,  $\text{CDCl}_3$ ,  $\delta$ ): 137.36 (C), 136.06 (C), 135.33 (C), 129.50 ( $\text{CH}\times 2$ ), 129.07 (CH), 127.52 (CH), 125.72 (CH), 125.42 (CH), 124.54 (CH), 124.19 (C), 124.09 ( $\text{CH}\times 2$ ), 91.95 (C), 75.13 (C), 31.29 ( $\text{CH}_3\times 3$ ), 27.52 (C), 2.48 ( $\text{CH}_2$ ).

HRMS-ESI ( $m/z$ ):  $[\text{M}+\text{Na}]^+$  calcd for  $\text{C}_{20}\text{H}_{20}\text{N}_2\text{Na}$ , 311.1519; found, 311.1529.

**(2-(3-Phenylprop-2-ynyl)phenyl)propylcarbodiimide (4m).** 80%

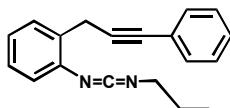

Colorless oil.

IR (neat/  $\text{cm}^{-1}$ ): 2931, 2854, 2129, 1581, 1496, 1450, 756.

$^1\text{H-NMR}$  (600 MHz,  $\text{CDCl}_3$ ,  $\delta$ ): 7.58 (dd,  $J=0.9, 7.5$  Hz, 1H), 7.49–7.42 (m, 2H), 7.34–7.27 (m, 3H), 7.25–7.08 (m, 3H), 3.85 (s, 2H), 3.39 (t,  $J=6.8$  Hz, 2H), 1.71 (tq,  $J=0.7, 7.4$  Hz, 2H), 1.01 (t,  $J=7.4$  Hz, 3H).

$^{13}\text{C-NMR}$  (150 MHz,  $\text{CDCl}_3$ ,  $\delta$ ): 138.55 (C), 135.22 (C), 131.64 ( $\text{CH}\times 2$ ), 130.40 (C), 129.12 (CH), 128.18 ( $\text{CH}\times 2$ ), 127.72 (CH), 127.65 (CH), 124.67 (CH), 123.76 (C), 123.68 (CH), 87.42 (C), 82.69 (C), 48.58 ( $\text{CH}_2$ ), 24.72 ( $\text{CH}_2$ ), 21.88 ( $\text{CH}_2$ ), 11.43 ( $\text{CH}_3$ ).

HRMS-ESI ( $m/z$ ):  $[\text{M}+\text{Na}]^+$  calcd for  $\text{C}_{19}\text{H}_{18}\text{N}_2\text{Na}$ , 297.1362; found, 297.1371.

**Benzyl-(2-(3-phenylprop-2-ynyl)phenyl)carbodiimide (4n).** 80%

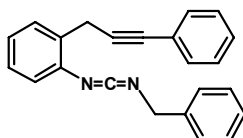

Colorless oil.

IR (neat/  $\text{cm}^{-1}$ ): 3055, 2137, 1497, 1265, 741.

$^1\text{H-NMR}$  (500 MHz,  $\text{CDCl}_3$ ,  $\delta$ ): 7.55 (d,  $J=7.6$  Hz, 1H), 7.47–7.42 (m, 2H), 7.37 (d,  $J=4.5$  Hz, 4H), 7.34–7.27 (m, 4H), 7.16 (ddd,  $J=1.4, 7.4, 7.4$  Hz, 1H), 7.11 (ddd,  $J=1.3, 7.4, 7.4$  Hz, 1H), 7.00 (dd,  $J=1.3, 7.7$  Hz, 1H), 4.58 (s, 2H), 3.79 (s, 2H).

$^{13}\text{C-NMR}$  (125 MHz,  $\text{CDCl}_3$ ,  $\delta$ ): 137.81 (C), 136.41 (C), 131.65 ( $\text{CH}\times 2$ ), 130.52 (C), 129.11 (CH), 128.80 ( $\text{CH}\times 2$ ), 128.58 (C), 128.20 ( $\text{CH}\times 2$ ), 127.82 (CH), 127.75 (CH), 127.66 (CH), 127.40 ( $\text{CH}\times 2$ ), 125.01 (CH), 123.99 (CH), 123.74 (C), 87.27 (C), 82.77 (C), 50.51 ( $\text{CH}_2$ ), 21.91 ( $\text{CH}_2$ ).

HRMS-ESI ( $m/z$ ):  $[\text{M}+\text{Na}]^+$  calcd for  $\text{C}_{23}\text{H}_{18}\text{N}_2\text{Na}$ , 345.1362; found, 345.1353.

**Cyclohexyl-(2-(3-phenylprop-2-ynyl)phenyl)carbodiimide (4o).** 72%

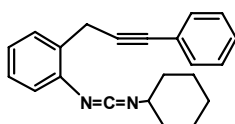

Colorless oil.

IR (neat/  $\text{cm}^{-1}$ ): 2962, 2129, 1589, 1489, 1296, 1041, 849, 756.

$^1\text{H-NMR}$  (500 MHz,  $\text{CDCl}_3$ ,  $\delta$ ): 7.58 (d,  $J=7.4$  Hz, 1H), 7.47–7.43 (m, 2H), 7.31–7.27 (m, 3H), 7.21 (ddd,  $J=1.4, 7.4, 7.4$  Hz, 1H), 7.17 (ddd,  $J=1.4, 7.9, 7.9$  Hz, 1H), 7.11 (ddd,  $J=1.5, 7.4, 7.4$  Hz, 1H), 3.85 (s, 2H), 3.48 (tt,  $J=3.7, 9.7$  Hz, 1H), 2.05–1.98 (m, 2H), 1.80–1.72 (m, 2H), 1.60–1.45 (m, 3H), 1.38–1.20 (m, 3H).

$^{13}\text{C-NMR}$  (125 MHz,  $\text{CDCl}_3$ ,  $\delta$ ): 138.77 (C), 131.66 ( $\text{CH}\times 2$ ), 130.41 (C), 129.12 (CH), 128.18 ( $\text{CH}\times 2$ ), 127.71 (CH), 127.66 (CH), 124.63 (CH), 123.81 (C), 123.48 (CH), 120.37 (C), 87.50 (C), 82.68 (C), 56.63 (CH), 34.95 ( $\text{CH}_2\times 2$ ), 25.32 ( $\text{CH}_2\times 2$ ), 24.38 ( $\text{CH}_2$ ), 21.90 ( $\text{CH}_2$ ).

HRMS-ESI ( $m/z$ ):  $[\text{M}+\text{Na}]^+$  calcd for  $\text{C}_{22}\text{H}_{22}\text{N}_2\text{Na}$ , 337.1675; found, 338.1685.

**Phenyl-(2-(3-phenylprop-2-ynyl)phenyl)carbodiimide (4p).** 80%

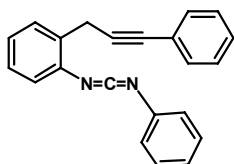

Colorless oil.

IR (neat/  $\text{cm}^{-1}$ ): 3016, 2893, 2276, 2144, 1589, 1489, 1211, 756.

$^1\text{H-NMR}$  (500 MHz,  $\text{CDCl}_3$ ,  $\delta$ ): 7.61 (d,  $J = 7.7$  Hz, 1H), 7.47–7.43 (m, 2H), 7.31–7.28 (m, 4H), 7.27–7.24 (m, 2H), 7.20–7.14 (m, 5H), 3.93 (s, 2H).

$^{13}\text{C-NMR}$  (125 MHz,  $\text{CDCl}_3$ ,  $\delta$ ): 138.45 (C), 137.89 (C), 136.36 (C), 131.70 ( $\text{CH}\times 2$ ), 130.97 (C), 129.52 ( $\text{CH}\times 2$ ), 129.43 (CH), 129.05 ( $\text{CH}\times 2$ ), 128.24 (CH), 127.95 (CH), 125.85 (CH), 125.54 (CH), 124.80 (CH), 124.18 ( $\text{CH}\times 2$ ), 123.62 (C), 86.95 (C), 82.94 (C), 22.32 ( $\text{CH}_2$ ).

HRMS-ESI ( $m/z$ ):  $[\text{M}+\text{H}]^+$  calcd for  $\text{C}_{22}\text{H}_{17}\text{N}_2$ , 309.1386; found, 309.1395.

**(2-(3-(*tert*-Butyldimethylsilyl)prop-2-ynyl)phenyl)propylcarbodiimide (4q).** 72%

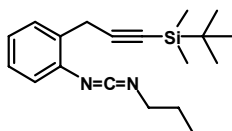

Colorless oil.

IR (neat/  $\text{cm}^{-1}$ ): 3055, 2954, 2854, 2137, 1581, 1496, 1265, 833, 741.

$^1\text{H-NMR}$  (500 MHz,  $\text{CDCl}_3$ ,  $\delta$ ): 7.54 (d,  $J = 7.6$  Hz, 1H), 7.19 (dd,  $J = 7.7, 7.4$  Hz, 1H), 7.12 (d,  $J = 7.7$  Hz, 1H), 7.10 (dd,  $J = 7.6, 7.6$  Hz, 1H), 3.68 (s, 2H), 3.38 (t,  $J = 6.7$  Hz, 2H), 1.70 (tq,  $J = 6.8, 7.3$  Hz, 2H), 1.01 (t,  $J = 7.3$  Hz, 3H), 0.95 (s, 9H), 0.12 (s, 6H).

$^{13}\text{C-NMR}$  (125 MHz,  $\text{CDCl}_3$ ,  $\delta$ ): 138.41 (C), 135.21 (C), 130.17 (C), 128.89 (CH), 127.53 (CH), 124.62 (CH), 123.54 (CH), 104.66 (C), 85.23 (C), 48.59 ( $\text{CH}_2$ ), 26.12 ( $\text{CH}_3\times 3$ ), 24.74 ( $\text{CH}_2$ ), 22.32 ( $\text{CH}_2$ ), 16.59 (C), 11.45 ( $\text{CH}_3$ ), -4.44 ( $\text{CH}_3\times 2$ ).

HRMS-ESI ( $m/z$ ):  $[\text{M}+\text{Na}]^+$  calcd for  $\text{C}_{19}\text{H}_{28}\text{N}_2\text{NaSi}$ , 335.1914; found, 335.1917.

**Benzyl-(2-(3-(*tert*-butyldimethylsilyl)prop-2-ynyl)phenyl)carbodiimide (4r).** 75%

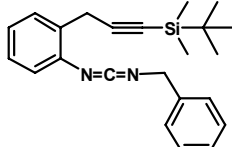

Colorless oil.

IR (neat/  $\text{cm}^{-1}$ ): 2931, 2854, 2137, 1350, 1026, 833, 756.

$^1\text{H-NMR}$  (600 MHz,  $\text{CDCl}_3$ ,  $\delta$ ): 7.52 (d,  $J = 7.6$  Hz, 1H), 7.39–7.35 (m, 4H), 7.34–7.28 (m, 1H), 7.13 (dd,  $J = 7.5, 7.5$  Hz, 1H), 7.09 (dd,  $J = 7.4, 7.4$  Hz, 1H), 6.97 (d,  $J = 7.6$  Hz, 1H), 4.56 (s, 2H), 3.62 (s, 2H), 0.95 (s, 9H), 0.12 (s, 6H).

$^{13}\text{C-NMR}$  (150 MHz,  $\text{CDCl}_3$ ,  $\delta$ ): 137.88 (C), 137.72 (C), 136.38 (C), 130.32 (C), 128.91 (CH), 128.81 ( $\text{CH}\times 2$ ), 127.83 (CH), 127.54 (CH), 127.41 ( $\text{CH}\times 2$ ), 124.96 (CH), 123.85 (CH), 104.53 (C), 85.36 (C), 50.53 ( $\text{CH}_2$ ), 26.14 ( $\text{CH}_3\times 3$ ), 22.34 ( $\text{CH}_2$ ), 16.57 (C), -4.43 ( $\text{CH}_3\times 2$ ).

HRMS-ESI ( $m/z$ ):  $[\text{M}+\text{Na}]^+$  calcd for  $\text{C}_{23}\text{H}_{28}\text{N}_2\text{NaSi}$ , 383.1914; found, 383.1912.

**(2-(3-(*tert*-Butyldimethylsilyl)prop-2-ynyl)phenyl)cyclohexylcarbodiimide (4s).** 84%

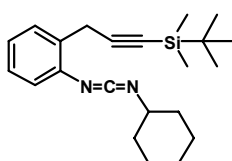



Colorless oil.

IR (neat/  $\text{cm}^{-1}$ ): 2931, 2137, 1697, 1527, 1234, 1018, 833, 741.

$^1\text{H-NMR}$  (500 MHz,  $\text{CDCl}_3$ ,  $\delta$ ): 7.55 (d,  $J = 7.7$  Hz, 1H), 7.19 (ddd,  $J = 1.5, 7.7, 7.7$  Hz, 1H), 7.14 (dd,  $J = 1.5, 7.7$  Hz, 1H), 7.10 (ddd,  $J = 1.4, 7.7, 7.7$  Hz, 1H), 3.69 (s, 2H), 3.47 (tt,  $J = 3.9, 9.7$  Hz, 1H), 2.04–1.94 (m, 2H), 1.80–1.72 (m, 2H), 1.60–1.53 (m, 1H), 1.52–1.43 (m, 2H), 1.39–1.21 (m, 3H), 0.96 (s, 9H), 0.13 (s, 6H).

$^{13}\text{C-NMR}$  (125 MHz,  $\text{CDCl}_3$ ,  $\delta$ ): 138.60 (C), 135.37 (C), 130.13 (C), 128.87 (CH), 127.51 (CH), 124.56 (CH), 123.30 (CH), 104.72 (C), 85.20 (C), 56.59 (CH), 34.94 ( $\text{CH}_2 \times 2$ ), 26.12 ( $\text{CH}_3 \times 3$ ), 25.33 ( $\text{CH}_2$ ), 24.37 ( $\text{CH}_2$ ), 22.29 ( $\text{CH}_2 \times 2$ ), 16.58 (C), –4.43 ( $\text{CH}_3 \times 2$ ).

HRMS-ESI ( $m/z$ ):  $[\text{M}+\text{Na}]^+$  calcd for  $\text{C}_{22}\text{H}_{32}\text{N}_2\text{NaSi}$ , 375.2227; found, 375.2228.

**(2-(3-(*tert*-Butyldimethylsilyl)prop-2-ynyl)phenyl)phenylcarbodiimide (4t).** 82%

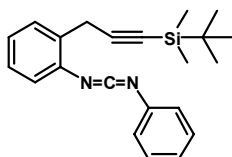

Colorless oil.

IR (neat/  $\text{cm}^{-1}$ ): 2931, 2854, 2144, 1658, 1489, 1250, 1026, 833, 756, 687.

$^1\text{H-NMR}$  (600 MHz,  $\text{CDCl}_3$ ,  $\delta$ ): 7.59 (d,  $J = 7.4$  Hz, 1H), 7.36 (m, 2H), 7.24 (m, 6H), 3.76 (s, 2H), 0.96 (s, 9H), 0.13 (s, 6H).

$^{13}\text{C-NMR}$  (150 MHz,  $\text{CDCl}_3$ ,  $\delta$ ): 138.46 (C), 136.17 (C), 134.39 (C), 130.72 (C), 129.52 ( $\text{CH} \times 2$ ), 129.16 (CH), 127.79 (CH), 125.79 (CH), 125.53 (CH), 124.65 (CH), 124.14 ( $\text{CH} \times 2$ ), 104.08 (C), 85.66 (C), 26.13 ( $\text{CH}_3 \times 3$ ), 22.64 ( $\text{CH}_2$ ), 16.59 (C), –4.45 ( $\text{CH}_3 \times 2$ ).

HRMS-ESI ( $m/z$ ):  $[\text{M}+\text{H}]^+$  calcd for  $\text{C}_{22}\text{H}_{27}\text{N}_2\text{Si}$ , 347.1938; found, 347.1944.

**Propyl-(2-(3-trimethylsilyl)prop-2-ynyl)phenylcarbodiimide (4u).** 94%

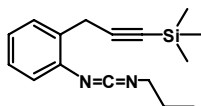

Colorless oil.

IR (neat/  $\text{cm}^{-1}$ ): 3055, 2144, 1265, 849, 741.

$^1\text{H-NMR}$  (500 MHz,  $\text{CDCl}_3$ ,  $\delta$ ): 7.52 (d,  $J = 1.0, 7.6$  Hz, 1H), 7.19 (ddd,  $J = 1.6, 7.3, 7.3$  Hz, 1H), 7.14–7.08 (m, 2H), 3.67 (s, 2H), 3.38 (t,  $J = 6.8$  Hz, 2H), 1.71 (tq,  $J = 6.9, 7.3$  Hz, 2H), 1.01 (t,  $J = 7.4$  Hz, 3H), 0.19 (s, 9H).

$^{13}\text{C-NMR}$  (125 MHz,  $\text{CDCl}_3$ ,  $\delta$ ): 138.45 (C), 135.20 (C), 130.02 (C), 128.94 (CH), 127.58 (CH), 124.63 (CH), 123.57 (CH), 104.19 (C), 86.99 (C), 48.58 ( $\text{CH}_2$ ), 24.73 ( $\text{CH}_2$ ), 22.28 ( $\text{CH}_2$ ), 11.44 ( $\text{CH}_3$ ), 0.12 ( $\text{CH}_3 \times 3$ ).

HRMS-ESI ( $m/z$ ):  $[\text{M}+\text{Na}]^+$  calcd for  $\text{C}_{16}\text{H}_{22}\text{N}_2\text{NaSi}$ , 293.1444; found, 293.1453.

**Propyl-(2-(3-triethylsilyl)prop-2-ynyl)phenylcarbodiimide (4v).** 85%

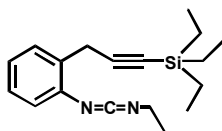

Colorless oil.

IR (neat/  $\text{cm}^{-1}$ ): 2962, 2137, 1643, 1265, 1018, 741.

$^1\text{H-NMR}$  (500 MHz,  $\text{CDCl}_3$ ,  $\delta$ ): 7.51 (d,  $J = 7.6$  Hz, 1H), 7.19 (dd,  $J = 7.5, 7.5$  Hz, 1H), 7.13 (d,  $J = 7.3$  Hz, 1H), 7.10 (dd,  $J = 7.6, 7.6$  Hz, 1H), 3.70 (s, 2H), 3.38 (t,  $J = 6.8$  Hz, 2H), 1.70 (tq,  $J = 7.1, 7.1$  Hz, 2H), 1.01 (t,  $J = 7.8$  Hz, 12H), 0.62 (q,  $J = 7.8$  Hz, 6H).

$^{13}\text{C-NMR}$  (125 MHz,  $\text{CDCl}_3$ ,  $\delta$ ): 138.40 (C), 135.21 (C), 130.21 (C), 128.89 (CH), 127.50 (CH), 124.60 (CH), 123.51 (CH), 105.16 (C), 84.58 (C), 48.58 ( $\text{CH}_2$ ), 24.73 ( $\text{CH}_2$ ), 22.34 ( $\text{CH}_2$ ), 11.43 ( $\text{CH}_3$ ), 7.49 ( $\text{CH}_3 \times 3$ ), 4.53 ( $\text{CH}_2 \times 3$ ).

HRMS-ESI ( $m/z$ ):  $[\text{M}+\text{H}]^+$  calcd for  $\text{C}_{19}\text{H}_{29}\text{N}_2\text{Si}$ , 313.2095; found, 313.2088.

**(2-(1-Methylbut-2-ynyl)phenyl)propylcarbodiimide (5a).** 90%

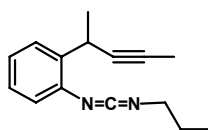

Colorless oil.

IR (neat/  $\text{cm}^{-1}$ ): 2970, 2137, 1589, 1496, 1265, 741.

$^1\text{H-NMR}$  (500 MHz,  $\text{CDCl}_3$ ,  $\delta$ ): 7.56 (dd,  $J = 1.5, 7.6$  Hz, 1H), 7.20–7.08 (m, 3H), 4.20–4.14 (m, 1H), 3.38 (t,  $J = 6.8$  Hz, 2H), 1.85 (d,  $J = 2.4$  Hz, 3H), 1.71 (dt,  $J = 7.2, 7.2$  Hz, 2H), 1.39 (d,  $J = 7.0$  Hz, 3H), 1.02 (t,  $J = 7.3$  Hz, 3H).

$^{13}\text{C-NMR}$  (150 MHz,  $\text{CDCl}_3$ ,  $\delta$ ): 137.50 (C), 137.46 (C), 135.62 (C), 127.82 (CH), 127.36 (CH), 124.82 (CH), 123.84 (CH), 82.18 (C), 76.88 (C), 48.61 ( $\text{CH}_2$ ), 27.09 ( $\text{CH}_3$ ), 24.76 ( $\text{CH}_2$ ), 23.50 (CH), 11.45 ( $\text{CH}_3$ ), 3.64 ( $\text{CH}_3$ ).

HRMS-ESI ( $m/z$ ):  $[\text{M}+\text{Na}]^+$  calcd for  $\text{C}_{15}\text{H}_{18}\text{N}_2\text{Na}$ , 249.1362; found, 249.1361.

**(2-(1-Methylbut-2-ynyl)phenyl)phenylcarbodiimide (5b).** 63%

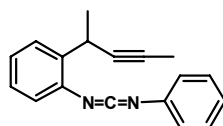

Colorless oil.

IR (neat/  $\text{cm}^{-1}$ ): 2970, 2306, 1589, 1411, 1265, 748.

$^1\text{H-NMR}$  (500 MHz,  $\text{CDCl}_3$ ,  $\delta$ ): 7.63–7.58 (m, 1H), 7.35–7.30 (m, 2H), 7.21–7.15 (m, 6H), 4.25–4.17 (m, 1H), 1.85 (d,  $J = 2.4$  Hz, 3H), 1.45 (d,  $J = 7.1$  Hz, 3H).

$^{13}\text{C-NMR}$  (125 MHz,  $\text{CDCl}_3$ ,  $\delta$ ): 138.63 (C), 137.94 (C), 135.27 (C), 129.50 ( $\text{CH}\times 2$ ), 128.03 (CH), 127.60 (CH), 125.96 (CH), 125.44 (CH), 124.96 (CH), 124.19 (C), 124.10 ( $\text{CH}\times 2$ ), 81.78 (C), 77.26 (C), 27.56 ( $\text{CH}_3$ ), 23.47 (CH), 3.63 ( $\text{CH}_3$ ).

HRMS-ESI ( $m/z$ ):  $[\text{M}+\text{H}]^+$  calcd for  $\text{C}_{18}\text{H}_{17}\text{N}_2$ : 261.1386; found 261.1374.

**Propyl-(2-(1,4,4-trimethylpent-2-ynyl)phenyl)carbodiimide (5c).** 91%

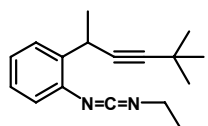

Colorless oil.

IR (neat/  $\text{cm}^{-1}$ ): 2970, 2137, 1643, 1257, 756.

$^1\text{H-NMR}$  (600 MHz,  $\text{CDCl}_3$ ,  $\delta$ ): 7.58 (dd,  $J = 1.4, 7.6$  Hz, 1H), 7.18–7.14 (m, 1H), 7.13–7.08 (m, 2H), 4.16 (q,  $J = 7.0$  Hz, 1H), 3.37 (t,  $J = 6.8$  Hz, 2H), 1.71 (tq,  $J = 7.1, 7.2$  Hz, 2H), 1.36 (d,  $J = 7.1$  Hz, 3H), 1.24 (s, 9H), 1.01 (t,  $J = 7.4$  Hz, 3H).

$^{13}\text{C-NMR}$  (150 MHz,  $\text{CDCl}_3$ ,  $\delta$ ): 137.90 (C), 137.41 (C), 135.67 (C), 127.87 (CH), 127.23 (CH), 124.78 (CH), 123.77 (CH), 90.58 (C), 81.34 (C), 48.62 ( $\text{CH}_2$ ), 31.37 ( $\text{CH}_3\times 3$ ), 27.39 (C), 27.16 ( $\text{CH}_3$ ), 24.77 ( $\text{CH}_2$ ), 24.07 (CH), 11.45 ( $\text{CH}_3$ ).

HRMS-ESI ( $m/z$ ):  $[\text{M}+\text{Na}]^+$  calcd for  $\text{C}_{18}\text{H}_{24}\text{N}_2\text{Na}$ , 291.1832; found, 291.1843.

**Phenyl-(2-(1,4,4-trimethylpent-2-ynyl)phenyl)carbodiimide (5d).** 80%

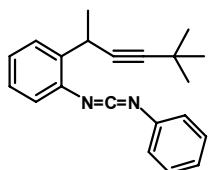

Colorless oil.

IR (neat/  $\text{cm}^{-1}$ ): 3062, 2970, 2144, 1651, 1589, 1489, 1211, 748.

$^1\text{H-NMR}$  (500 MHz,  $\text{CDCl}_3$ ,  $\delta$ ): 7.64–7.61 (m, 1H), 7.35–7.31 (m, 3H), 7.21–7.15 (m, 5H), 4.21 (q,  $J = 7.0$  Hz, 1H), 1.42 (d,  $J = 7.1$  Hz, 3H), 1.25 (s, 9H).

$^{13}\text{C-NMR}$  (125 MHz,  $\text{CDCl}_3$ ,  $\delta$ ): 138.68 (C), 138.36 (C), 135.19 (C), 129.53 (CH $\times$ 2), 128.10 (CH), 127.51 (CH), 125.97 (CH), 125.62 (C), 125.45 (CH), 124.92 (CH), 124.10 (CH $\times$ 2), 90.34 (C), 80.96 (C), 31.37 (CH $_3$  $\times$ 3), 27.60 (CH $_3$ ), 27.43 (C), 24.11 (CH).

HRMS-ESI ( $m/z$ ):  $[\text{M}+\text{H}]^+$  calcd for  $\text{C}_{21}\text{H}_{23}\text{N}_2$ , 303.1856; found, 303.1856.

**(2-(1-Methyl-3-phenylprop-2-ynyl)phenyl)propylcarbodiimide (5e)**. 90%

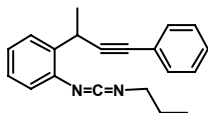

Colorless oil.

IR (neat/  $\text{cm}^{-1}$ ): 2970, 2924, 2138, 1581, 1496, 748.

$^1\text{H-NMR}$  (500 MHz,  $\text{CDCl}_3$ ,  $\delta$ ): 7.65 (d,  $J = 7.7$  Hz, 1H), 7.46–7.43 (m, 2H), 7.32–7.26 (m, 3H), 7.20 (dd,  $J = 7.8, 7.8$ , 1H), 7.17 (dd,  $J = 7.7, 7.7$  Hz, 1H), 7.13 (dd,  $J = 7.8, 7.8$  Hz, 1H), 4.45 (q,  $J = 7.0$  Hz, 1H), 3.39 (t,  $J = 0.9$  Hz, 2H), 1.72 (tq,  $J = 6.8, 7.2$  Hz, 2H), 1.52 (d,  $J = 7.1$  Hz, 3H), 1.02 (t,  $J = 7.2$  Hz, 3H).

$^{13}\text{C-NMR}$  (125 MHz,  $\text{CDCl}_3$ ,  $\delta$ ): 137.60 (C), 136.86 (C), 135.54 (C), 131.63 (CH $\times$ 2), 128.15 (CH $\times$ 2), 127.93 (CH), 127.64 (CH), 127.57 (CH), 124.90 (CH), 123.91 (CH), 123.83 (C), 92.93 (C), 81.80 (C), 48.62 (CH $_2$ ), 27.77 (CH), 24.78 (CH $_2$ ), 23.37 (CH $_3$ ), 11.46 (CH $_3$ ).

HRMS-ESI ( $m/z$ ):  $[\text{M}+\text{H}]^+$  calcd for  $\text{C}_{20}\text{H}_{21}\text{N}_2$ , 289.1699; found, 289.1694.

**(2-(1-Methyl-3-phenylprop-2-ynyl)phenyl)phenylcarbodiimide (5f)**. 37%

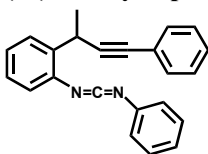

Colorless oil.

IR (neat/  $\text{cm}^{-1}$ ): 3062, 2924, 2854, 1650, 1404, 1211, 903, 756.

$^1\text{H-NMR}$  (600 MHz,  $\text{CDCl}_3$ ,  $\delta$ ): 7.68 (d,  $J = 7.2$  Hz, 1H), 7.47–7.43 (m, 2H), 7.33–7.27 (m, 5H), 7.25–7.15 (m, 6H), 4.49 (q,  $J = 7.1$  Hz, 1H), 1.58 (d,  $J = 7.0$  Hz, 3H).

$^{13}\text{C-NMR}$  (150 MHz,  $\text{CDCl}_3$ ,  $\delta$ ): 138.44 (C), 137.24 (C), 135.39 (C), 134.79 (C), 131.64 (CH $\times$ 2), 129.51 (CH $\times$ 2), 128.18 (CH $\times$ 2), 128.11 (CH), 127.82 (CH), 127.74 (CH), 126.04 (CH), 125.51 (CH), 125.04 (CH), 124.12 (CH $\times$ 2), 123.65 (C), 92.42 (C), 82.08 (C), 28.19 (CH), 23.29 (CH $_3$ ).

HRMS-ESI ( $m/z$ ):  $[\text{M}+\text{H}]^+$  calcd for  $\text{C}_{23}\text{H}_{19}\text{N}_2$ , 323.1543; found, 323.1540.

**(2-(3-(tert-Butyldimethylsilyl)-1-methylprop-2-ynyl)phenyl)propylcarbodiimide (5g)**. 39%

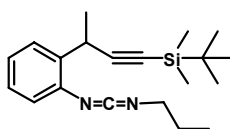

Colorless oil.

IR (neat/  $\text{cm}^{-1}$ ): 2954, 2862, 2144, 1496, 1250, 1080, 833, 764.

$^1\text{H-NMR}$  (500 MHz,  $\text{CDCl}_3$ ,  $\delta$ ): 7.59 (dd,  $J = 1.4, 7.6$  Hz, 1H), 7.17 (ddd,  $J = 1.6, 7.0, 7.1$  Hz, 1H), 7.14–7.08 (m, 2H), 4.25 (q,  $J = 7.0$  Hz, 1H), 3.38 (t,  $J = 6.8$  Hz, 2H), 1.71 (tq,  $J = 7.0, 7.3$  Hz, 2H), 1.41 (d,  $J = 7.0$  Hz, 3H), 1.02 (t,  $J = 7.3$  Hz, 3H), 0.95 (s, 9H), 0.11 (d,  $J = 3.1$  Hz, 6H).

$^{13}\text{C-NMR}$  (125 MHz,  $\text{CDCl}_3$ ,  $\delta$ ): 146.57 (C), 137.51 (C), 136.73 (C), 127.88 (CH), 127.47 (CH), 124.82 (CH), 123.81 (CH), 110.44 (C), 83.84 (C), 48.60 (CH $_2$ ), 28.26 (CH), 26.12 (CH $_3$  $\times$ 3), 24.77 (CH $_2$ ), 23.67 (CH $_3$ ), 15.60 (C), 11.44 (CH $_3$ ), -4.44 (CH $_3$  $\times$ 2).

HRMS-ESI ( $m/z$ ):  $[\text{M}+\text{Na}]^+$  calcd for  $\text{C}_{20}\text{H}_{30}\text{N}_2\text{NaSi}$ , 349.2070; found, 349.2077.

**(2-(3-(*tert*-Butyldimethylsilyl)-1-methylprop-2-ynyl)phenyl)phenylcarbodiimide (5h).** 27%

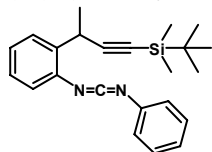

Colorless oil.

IR (neat/  $\text{cm}^{-1}$ ): 2931, 2144, 1589, 1489, 1211, 833, 756.

$^1\text{H-NMR}$  (500 MHz,  $\text{CDCl}_3$ ,  $\delta$ ): 7.65–7.62 (m, 1H), 7.32 (dd,  $J = 7.9, 7.9$  Hz, 2H), 7.21–7.15 (m, 6H), 4.30 (q,  $J = 7.0$  Hz, 1H), 1.47 (d,  $J = 7.0$  Hz, 3H), 0.96 (s, 9H), 0.13 (s, 3H), 0.12 (s, 3H).

$^{13}\text{C-NMR}$  (125 MHz,  $\text{CDCl}_3$ ,  $\delta$ ): 138.51 (C), 137.18 (C), 135.30 (C), 134.70 (C), 129.52 (CH $\times$ 2), 128.10 (CH), 127.74 (CH), 125.98 (CH), 125.51 (CH), 124.95 (CH), 124.11 (CH $\times$ 2), 109.89 (C), 84.29 (C), 28.65 (CH $_3$ ), 26.12 (CH $_3\times$ 3), 23.70 (CH), 16.00 (C), -4.45 (CH $_3\times$ 2).

HRMS-ESI ( $m/z$ ):  $[\text{M}+\text{Na}]^+$  calcd for  $\text{C}_{23}\text{H}_{28}\text{N}_2\text{NaSi}$ , 383.1914; found, 383.1918.

**Propyl -(2-(2-methoxypent-3-yn-2-yl)carbodiimide (6a).** 51%

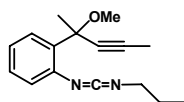

Colorless oil.

IR (neat/  $\text{cm}^{-1}$ ): 2970, 2939, 2144, 1496, 1095, 756.

$^1\text{H-NMR}$  (600 MHz,  $\text{CDCl}_3$ ,  $\delta$ ): 7.74 (d,  $J = 7.4$  Hz, 1H), 7.24 (ddd,  $J = 1.5, 7.7, 7.7$  Hz, 1H), 7.15 (dd,  $J = 1.3, 7.8$  Hz, 1H), 7.09 (ddd,  $J = 1.3, 7.4, 7.7$  Hz, 1H), 3.38 (t,  $J = 6.8$  Hz, 2H), 3.23 (s, 3H), 1.98 (s, 3H), 1.87 (s, 3H), 1.70 (tq,  $J = 7.1, 7.3$  Hz, 2H), 1.01 (t,  $J = 7.4$  Hz, 3H).

$^{13}\text{C-NMR}$  (150 MHz,  $\text{CDCl}_3$ ,  $\delta$ ): 138.07 (C), 134.33 (C), 134.30 (C), 128.97 (CH), 128.69 (CH), 125.61 (CH), 124.02 (CH), 82.93 (C), 79.77 (C), 76.61 (C), 52.13 (CH $_3$ ), 48.50 (CH $_2$ ), 29.00 (CH $_3$ ), 24.74 (CH $_2$ ), 11.47 (CH $_3$ ), 3.72 (CH $_3$ ).

HRMS-ESI ( $m/z$ ):  $[\text{M}+\text{Na}]^+$  calcd for  $\text{C}_{16}\text{H}_{20}\text{N}_2\text{NaO}$ , 279.1468; found, 279.1462.

**(2-(1-Methoxy-1,4,4-trimethylpent-2-ynyl)phenyl)propylcarbodiimide (6b).** 66%

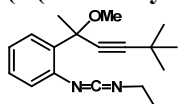

Colorless oil.

IR (neat/  $\text{cm}^{-1}$ ): 2970, 2144, 1219, 1095, 756.

$^1\text{H-NMR}$  (600 MHz,  $\text{CDCl}_3$ ,  $\delta$ ): 7.74 (dd,  $J = 1.5, 7.8$  Hz, 1H), 7.23 (ddd,  $J = 1.5, 7.5, 7.5$  Hz, 1H), 7.14 (dd,  $J = 1.3, 7.7$  Hz, 1H), 7.08 (ddd,  $J = 1.3, 7.6, 7.6$  Hz, 1H), 3.38 (dt,  $J = 1.2, 6.8$  Hz, 2H), 3.21 (s, 3H), 1.85 (s, 3H), 1.69 (tq,  $J = 7.0, 7.3$  Hz, 2H), 1.31 (s, 9H), 1.00 (t,  $J = 7.3$  Hz, 3H).

$^{13}\text{C-NMR}$  (150 MHz,  $\text{CDCl}_3$ ,  $\delta$ ): 138.10 (C), 134.55 (C), 134.30 (C), 129.07 (CH), 128.61 (CH), 125.68 (CH), 123.97 (CH), 96.06 (C), 78.92 (C), 76.54 (C), 52.02 (CH $_3$ ), 48.46 (CH $_2$ ), 31.06 (CH $_3\times$ 3), 29.25 (CH $_3$ ), 27.57 (C), 24.77 (CH $_2$ ), 11.48 (CH $_3$ ).

HRMS-ESI ( $m/z$ ):  $[\text{M}+\text{H}]^+$  calcd for  $\text{C}_{19}\text{H}_{27}\text{N}_2\text{O}$ , 299.2122; found, 299.2118.

**Typical procedure for the catalytic Pauson–Khand reaction using  $[\text{Rh}(\text{CO})_2\text{Cl}]_2\text{-dppp}$  to produce 15: 3-Pentyl-1-propyl-1H-pyrrolo[2,3-*b*]quinolin-2(3H)-one (15a) (Table 2, Entry 1).**

1,2-Bis(diphenylphosphino)propane (dppp) (28.4 mg, 0.069 mmol) was added to a stirred solution of  $[\text{Rh}(\text{CO})_2\text{Cl}]_2$  (12.5 mg, 0.032 mmol) in *p*-xylene (5 mL), and the mixture was degassed and charged with carbon monoxide. The resulting pale yellow suspension was heated at 130 °C, and a solution of carbodiimide **4a** (123.7 mg, 0.462 mmol) in *p*-xylene (1 mL) was added slowly. After heating at the same temperature for 2.5 h, the mixture was evaporated. The residue was purified by silica gel column chromatography (ethyl acetate/hexane = 1:10) to provide pyrroloquinoline **15a** (109.6 mg, 0.370 mmol, 80%) as a

yellow oil.

**3-Pentyl-1-propyl-1H-pyrrolo[2,3-b]quinolin-2(3H)-one (15a).**

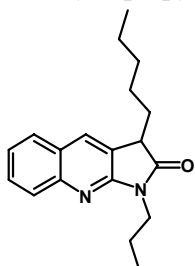

Yellow oil.

IR (neat/ $\text{cm}^{-1}$ ): 2931, 2862, 1728, 1643, 1581, 1450, 1219, 1088, 756.

$^1\text{H-NMR}$  (500 MHz,  $\text{CDCl}_3$ ,  $\delta$ ): 7.92 (d,  $J = 8.3$  Hz, 1H), 7.81 (s, 1H), 7.73 (dd,  $J = 0.9, 8.0$  Hz, 1H), 7.62 (ddd,  $J = 1.4, 7.2, 8.4$  Hz, 1H), 7.40 (ddd,  $J = 0.9, 7.4, 8.0$  Hz, 1H), 3.95–3.85 (m, 2H), 3.55 (ddd,  $J = 1.1, 5.5, 6.7$  Hz, 1H), 2.09–2.01 (m, 1H), 1.99–1.91 (m, 1H), 1.84 (tq,  $J = 7.4, 7.4$  Hz, 2H), 1.48–1.24 (m, 6H), 0.99 (t,  $J = 7.5$  Hz, 3H), 0.86 (t,  $J = 7.1$  Hz, 3H).

$^{13}\text{C-NMR}$  (125 MHz,  $\text{CDCl}_3$ ,  $\delta$ ): 177.48 (C), 156.94 (C), 146.91 (C), 130.23 (CH), 129.19 (CH), 127.75 (CH $\times 2$ ), 125.95 (C), 124.63 (C), 124.34 (CH), 44.15 (CH), 40.88 (CH $_2$ ), 31.66 (CH $_2$ ), 30.58 (CH $_2$ ), 25.44 (CH $_2$ ), 22.35 (CH $_2$ ), 20.85 (CH $_2$ ), 13.93 (CH $_3$ ), 11.35 (CH $_3$ ).

HRMS-ESI ( $m/z$ ):  $[\text{M}+\text{Na}]^+$  calcd for  $\text{C}_{19}\text{H}_{24}\text{N}_2\text{NaO}$ , 319.1781; found, 319.1775.

**1-Benzyl-3-pentyl-1H-pyrrolo[2,3-b]quinolin-2(3H)-one (15b).**

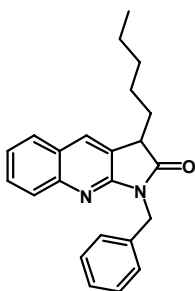

Yellow oil.

IR (neat/ $\text{cm}^{-1}$ ): 2931, 1720, 1643, 1442, 1219, 756.

$^1\text{H-NMR}$  (500 MHz,  $\text{CDCl}_3$ ,  $\delta$ ): 7.94 (d,  $J = 8.4$  Hz, 1H), 7.80 (d,  $J = 8.4$  Hz, 1H), 7.71 (dd,  $J = 1.2, 7.9$  Hz, 1H), 7.62 (ddd,  $J = 1.5, 7.0, 8.3$  Hz, 1H), 7.54 (d,  $J = 7.3$  Hz, 2H), 7.39 (ddd,  $J = 1.2, 7.0, 7.9$  Hz, 2H), 7.28 (dd,  $J = 7.3, 7.3$  Hz, 1H), 7.22 (dd,  $J = 7.3, 7.3$  Hz, 1H), 5.15–5.07 (m, 2H), 3.56 (t,  $J = 6.0$  Hz, 1H), 2.10–1.90 (m, 2H), 1.42–1.21 (m, 6H), 0.82 (t,  $J = 7.1$  Hz, 3H).

$^{13}\text{C-NMR}$  (125 MHz,  $\text{CDCl}_3$ ,  $\delta$ ): 177.25 (C), 156.44 (C), 146.83 (C), 136.75 (C), 130.45 (CH), 129.23 (CH), 128.71 (CH $\times 2$ ), 128.41 (CH $\times 2$ ), 127.91 (CH), 127.74 (CH), 127.50 (CH), 126.12 (C), 124.52 (C), 124.44 (CH), 44.22 (CH), 42.73 (CH $_2$ ), 31.62 (CH $_2$ ), 30.62 (CH $_2$ ), 25.43 (CH $_2$ ), 22.32 (CH $_2$ ), 13.91 (CH $_3$ ).

HRMS-ESI ( $m/z$ ):  $[\text{M}+\text{Na}]^+$  calcd for  $\text{C}_{23}\text{H}_{24}\text{N}_2\text{NaO}$ , 364.1781; found, 367.1791.

**1-Cyclohexyl-3-pentyl-1H-pyrrolo[2,3-b]quinolin-2(3H)-one (15c).**

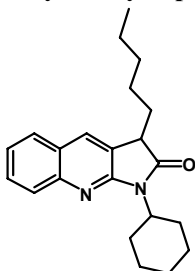

Brownish solid; mp: 67.8–69.0 °C.

IR (KBr/ $\text{cm}^{-1}$ ): 2931, 1720, 1635, 1581, 1435, 1219, 895, 748.

$^1\text{H-NMR}$  (500 MHz,  $\text{CDCl}_3$ ,  $\delta$ ): 7.92 (d,  $J=8.3$  Hz, 1H), 7.78 (s, 1H), 7.71 (d,  $J=7.5$  Hz, 1H), 7.61 (ddd,  $J=1.3, 7.2, 8.3$  Hz, 1H), 7.38 (ddd,  $J=0.8, 7.4, 7.4$  Hz, 1H), 4.48 (tt,  $J=3.8, 12.2$  Hz, 1H), 3.48 (t,  $J=5.6$  Hz, 1H), 2.61–2.49 (m, 2H), 2.06–1.84 (m, 4H), 1.76–1.69 (m, 2H), 1.51–1.22 (m, 10H), 0.85 (t,  $J=6.6$  Hz, 3H).

$^{13}\text{C-NMR}$  (125 MHz,  $\text{CDCl}_3$ ,  $\delta$ ): 177.35 (C), 157.04 (C), 146.69 (C), 129.99 (CH), 129.03 (CH), 127.85 (CH), 127.59 (CH), 125.57 (C), 124.59 (C), 124.25 (CH), 51.98 (CH), 44.00 (CH), 31.64 ( $\text{CH}_2$ ), 30.65 ( $\text{CH}_2$ ), 28.83 ( $\text{CH}_2$ ), 28.71 ( $\text{CH}_2$ ), 26.01 ( $\text{CH}_2$ ), 25.99 ( $\text{CH}_2$ ), 25.29 ( $\text{CH}_2$ ), 25.14 ( $\text{CH}_2$ ), 22.32 ( $\text{CH}_2$ ), 13.91 ( $\text{CH}_3$ ).

HRMS-ESI ( $m/z$ ):  $[\text{M}+\text{Na}]^+$  calcd for  $\text{C}_{22}\text{H}_{28}\text{N}_2\text{NaO}$ , 359.2094; found, 359.2097.

### 3-Pentyl-1-phenyl-1H-pyrrolo[2,3-b]quinolin-2(3H)-one (15d).

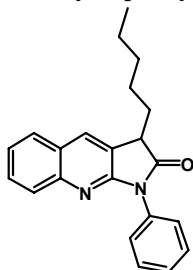

Yellow solid; mp: 103.4–106.3 °C.

IR (KBr/ $\text{cm}^{-1}$ ): 2924, 1736, 1581, 1427, 1219, 910, 748.

$^1\text{H-NMR}$  (500 MHz,  $\text{CDCl}_3$ ,  $\delta$ ): 7.91 (s, 1H), 7.87 (d,  $J=8.5$  Hz, 1H), 7.75 (d,  $J=7.9$  Hz, 1H), 7.63 (d,  $J=8.1$  Hz, 2H), 7.40 (dd,  $J=7.8, 7.8$  Hz, 1H), 7.54 (dd,  $J=7.7, 7.7$  Hz, 2H), 7.41 (dd,  $J=7.5, 7.5$  Hz, 2H), 3.73 (t,  $J=6.1$  Hz, 1H), 2.18–2.03 (m, 2H), 1.57–1.37 (m, 2H), 1.37–1.27 (m, 4H), 0.87 (t,  $J=6.8$  Hz, 3H).

$^{13}\text{C-NMR}$  (125 MHz,  $\text{CDCl}_3$ ,  $\delta$ ): 176.69 (C), 156.56 (C), 146.59 (C), 133.33 (C), 130.89 (CH), 129.29 (CH), 128.96 ( $\text{CH}\times 2$ ), 128.16 (CH), 127.91 (CH), 127.58 (CH), 126.70 ( $\text{CH}\times 2$ ), 126.22 (C), 124.74 (CH), 124.15 (C), 44.21 (CH), 31.65 ( $\text{CH}_2$ ), 30.94 ( $\text{CH}_2$ ), 25.42 ( $\text{CH}_2$ ), 22.35 ( $\text{CH}_2$ ), 13.94 ( $\text{CH}_3$ ).

HRMS-ESI ( $m/z$ ):  $[\text{M}+\text{Na}]^+$  calcd for  $\text{C}_{22}\text{H}_{22}\text{N}_2\text{NaO}$ , 353.1624; found, 353.1621.

### 3-Methyl-1-propyl-1H-pyrrolo[2,3-b]quinolin-2(3H)-one (15e).

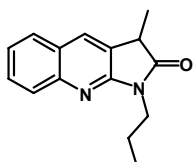

Yellow solid; mp: 105.0–105.8 °C.

IR (KBr/ $\text{cm}^{-1}$ ): 2939, 2360, 1712, 1635, 1442, 1373, 1219, 957, 756.

$^1\text{H-NMR}$  (300 MHz,  $\text{CDCl}_3$ ,  $\delta$ ): 7.92 (d,  $J=8.3$  Hz, 1H), 7.77 (s, 1H), 7.70 (d,  $J=7.8$  Hz, 1H), 7.61 (ddd,  $J=1.4, 7.0, 8.3$  Hz, 1H), 7.38 (ddd,  $J=1.0, 7.5, 7.5$  Hz, 1H), 3.89 (t,  $J=7.3$  Hz, 2H), 3.53 (q,  $J=7.2$  Hz, 1H), 1.84 (tq,  $J=7.4, 7.4$  Hz, 2H), 1.54 (d,  $J=7.5$  Hz, 3H), 0.99 (t,  $J=7.4$  Hz, 3H).

$^{13}\text{C-NMR}$  (75 MHz,  $\text{CDCl}_3$ ,  $\delta$ ): 177.97 (C), 156.44 (C), 146.84 (C), 129.88 (CH), 129.10 (CH), 127.67 (CH), 127.61 (CH), 125.92 (C), 125.74 (C), 124.26 (CH), 40.76 ( $\text{CH}_2$ ), 38.97 (CH), 20.76 ( $\text{CH}_2$ ), 15.33 ( $\text{CH}_3$ ), 11.24 ( $\text{CH}_3$ ).

HRMS-ESI ( $m/z$ ):  $[\text{M}+\text{H}]^+$  calcd for  $\text{C}_{15}\text{H}_{17}\text{N}_2\text{O}$ , 241.1335; found, 241.1343.

### 1-Benzyl-3-methyl-1H-pyrrolo[2,3-b]quinolin-2(3H)-one (15f).

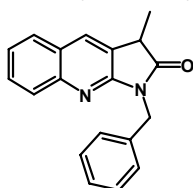

Yellow solid; mp: 135.0–135.2 °C.

IR (KBr/ $\text{cm}^{-1}$ ): 2978, 1813, 1720, 1643, 1581, 1442, 1211, 957, 733.

$^1\text{H-NMR}$  (500 MHz,  $\text{CDCl}_3$ ,  $\delta$ ): 7.94 (d,  $J = 8.4$  Hz, 1H), 7.78 (s, 1H), 7.70 (dd,  $J = 1.1, 8.0$  Hz, 1H), 7.62 (ddd,  $J = 1.3, 7.1, 7.2$  Hz, 1H), 7.56 (d,  $J = 7.9$  Hz, 2H), 7.39 (ddd,  $J = 1.1, 7.1, 8.0$  Hz, 1H), 7.29 (dd,  $J = 7.5, 7.5$  Hz, 2H), 7.23 (dd,  $J = 7.3, 7.3$  Hz, 1H), 5.14–5.06 (m, 2H), 3.55 (dq,  $J = 1.3, 7.7$  Hz, 1H), 1.54 (d,  $J = 7.6$  Hz, 3H).

$^{13}\text{C-NMR}$  (125 MHz,  $\text{CDCl}_3$ ,  $\delta$ ): 177.80 (C), 156.08 (C), 146.87 (C), 136.69 (C), 130.19 (CH), 129.24 (CH), 128.74 (CH $\times 2$ ), 128.44 (CH $\times 2$ ), 127.93 (CH), 127.69 (CH), 127.53 (CH), 126.17 (C), 125.70 (C), 124.47 (CH), 42.73 (CH $_2$ ), 39.20 (CH), 15.32 (CH $_3$ ).

HRMS-ESI ( $m/z$ ):  $[\text{M}+\text{Na}]^+$  calcd for  $\text{C}_{19}\text{H}_{16}\text{N}_2\text{NaO}$ , 311.1155; found, 311.1149.

### 1-Cyclohexyl-3-methyl-1H-pyrrolo[2,3-b]quinolin-2(3H)-one (15g).

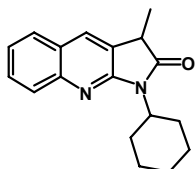

Yellow solid; mp: 135.0–137.8 °C.

IR (KBr/ $\text{cm}^{-1}$ ): 2924, 2854, 1720, 1635, 1581, 1427, 1219, 949, 748.

$^1\text{H-NMR}$  (500 MHz,  $\text{CDCl}_3$ ,  $\delta$ ): 7.92 (d,  $J = 8.4$  Hz, 1H), 7.76 (s, 1H), 7.69 (d,  $J = 8.0$  Hz, 1H), 7.60 (ddd,  $J = 1.3, 8.3, 8.3$  Hz, 1H), 7.38 (ddd,  $J = 1.1, 8.1, 8.1$  Hz, 1H), 4.47 (tt,  $J = 3.8, 12.8$  Hz, 1H), 3.47 (q,  $J = 7.6$  Hz, 1H), 2.55 (ddt,  $J = 3.6, 12.3, 21.8$  Hz, 2H), 1.89 (d,  $J = 13.1$  Hz, 2H), 1.78–1.68 (m, 3H), 1.52 (d,  $J = 7.6$  Hz, 3H), 1.50–1.30 (m, 3H).

$^{13}\text{C-NMR}$  (125 MHz,  $\text{CDCl}_3$ ,  $\delta$ ): 177.89 (C), 156.61 (C), 146.69 (C), 129.73 (CH), 129.00 (CH), 127.84 (CH), 127.50 (CH), 125.79 (C), 125.25 (C), 124.25 (CH), 51.90 (CH), 38.99 (CH), 28.72 (CH $_2 \times 2$ ), 25.95 (CH $_2 \times 2$ ), 25.23 (CH $_2$ ), 15.42 (CH $_3$ ).

HRMS-ESI ( $m/z$ ):  $[\text{M}+\text{Na}]^+$  calcd for  $\text{C}_{18}\text{H}_{20}\text{N}_2\text{NaO}$ , 303.1568; found, 303.1463.

### 3-Methyl-1-phenyl-1H-pyrrolo[2,3-b]quinolin-2(3H)-one (15h).

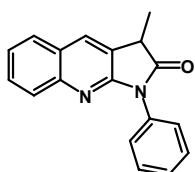

Yellow solid; mp: 155.0–156.3 °C.

IR (KBr/ $\text{cm}^{-1}$ ): 3055, 1720, 1643, 1435, 1227, 748.

$^1\text{H-NMR}$  (500 MHz,  $\text{CDCl}_3$ ,  $\delta$ ): 7.91 (s, 1H), 7.87 (d,  $J = 8.3$  Hz, 1H), 7.75 (d,  $J = 8.0$  Hz, 1H), 7.66–7.63 (m, 2H), 7.60 (ddd,  $J = 1.4, 7.1, 8.2$  Hz, 1H), 7.57–7.52 (m, 2H), 7.45–7.39 (m, 2H), 3.76 (q,  $J = 7.6$  Hz, 1H), 1.67 (d,  $J = 7.6$  Hz, 3H).

$^{13}\text{C-NMR}$  (125 MHz,  $\text{CDCl}_3$ ,  $\delta$ ): 177.25 (C), 156.22 (C), 146.65 (C), 133.29 (C), 130.70 (CH), 129.34 (CH), 129.00 (CH $\times 2$ ), 128.20 (CH), 127.95 (CH), 127.55 (CH), 126.67 (CH $\times 2$ ), 126.31 (C), 125.38 (C), 124.81 (CH), 39.24 (CH), 15.68 (CH $_3$ ).

HRMS-ESI ( $m/z$ ):  $[\text{M}+\text{Na}]^+$  calcd for  $\text{C}_{18}\text{H}_{14}\text{N}_2\text{NaO}$ , 297.0998; found, 297.1001.

### 3-tert-Butyl-1-propyl-1H-pyrrolo[2,3-b]quinolin-2(3H)-one (15i).

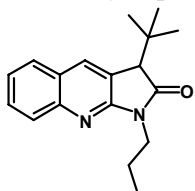

Yellow oil.

IR (KBr/ $\text{cm}^{-1}$ ): 2962, 1720, 1635, 1365, 1219, 756.

$^1\text{H-NMR}$  (600 MHz,  $\text{CDCl}_3$ ,  $\delta$ ): 7.90 (d,  $J = 8.4$  Hz, 1H), 7.82 (s, 1H), 7.69 (d,  $J = 8.0$  Hz, 1H), 7.60 (dd,  $J = 7.5, 7.5$  Hz, 1H), 7.37 (dd,  $J = 7.4, 7.4$  Hz, 1H), 3.94–3.81 (m, 2H), 3.19 (s, 1H), 1.87–1.75 (m, 2H), 1.13 (s, 9H), 0.99 (t,  $J = 7.4$  Hz, 3H).

$^{13}\text{C-NMR}$  (150 MHz,  $\text{CDCl}_3$ ,  $\delta$ ): 175.96 (C), 157.02 (C), 146.70 (C), 132.14 (CH), 129.14 (CH), 127.78 (CH), 127.43 (CH), 125.45 (C), 124.07 (CH), 122.87 (C), 53.79 (CH), 40.54 (CH $_2$ ), 35.04 (C), 27.30 (CH $_3 \times 3$ ), 20.80 (CH $_2$ ), 11.35 (CH $_3$ ).

HRMS-ESI ( $m/z$ ):  $[M+Na]^+$  calcd for  $C_{18}H_{22}N_2NaO$ , 305.1624; found, 305.1633.

**1-Benzyl-3-*tert*-butyl-1*H*-pyrrolo[2,3-*b*]quinolin-2(3*H*)-one (15j).**

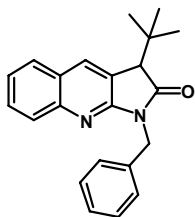

Yellow solid; mp: 115.2–115.7 °C.

IR (KBr/ $cm^{-1}$ ): 2954, 1720, 1635, 1442, 1219, 1157, 887, 756.

$^1H$ -NMR (500 MHz,  $CDCl_3$ ,  $\delta$ ): 7.93 (d,  $J = 8.3$  Hz, 1H), 7.86 (s, 1H), 7.69 (d,  $J = 8.0$  Hz, 1H), 7.61 (dd,  $J = 7.1, 7.1$  Hz, 1H), 7.55 (d,  $J = 7.8$  Hz, 2H), 7.38 (dd,  $J = 7.5, 7.5$  Hz, 1H), 7.27 (dd,  $J = 7.6, 7.6$  Hz, 2H), 7.23–7.18 (m, 1H), 5.12 (d,  $J = 14.5$  Hz, 1H), 5.06 (d,  $J = 14.5$  Hz, 1H), 3.25 (s, 1H), 1.10 (s, 9H).

$^{13}C$ -NMR (125 MHz,  $CDCl_3$ ,  $\delta$ ): 175.92 (C), 156.70 (C), 146.75 (C), 136.83 (C), 132.50 (CH), 129.32 (CH), 128.76 (CH $\times 2$ ), 128.32 (CH $\times 2$ ), 127.88 (CH), 127.69 (CH), 127.42 (CH), 125.75 (C), 124.31 (CH), 122.93 (C), 54.03 (CH), 42.57 (CH $_2$ ), 35.40 (C), 27.42 (CH $_3 \times 3$ ).

HRMS-ESI ( $m/z$ ):  $[M+Na]^+$  calcd for  $C_{22}H_{22}N_2NaO$ , 353.1624; found, 353.1628.

**3-*tert*-Butyl-1-cyclohexyl-1*H*-pyrrolo[2,3-*b*]quinolin-2(3*H*)-one (15k).**

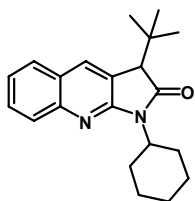

Yellow solid; mp: 139.1–139.4 °C.

IR (KBr/ $cm^{-1}$ ): 2931, 2862, 1720, 1628, 1581, 1427, 1350, 1219, 748.

$^1H$ -NMR (500 MHz,  $CDCl_3$ ,  $\delta$ ): 7.90 (d,  $J = 8.3$  Hz, 1H), 7.86 (s, 1H), 7.71 (dd,  $J = 0.9, 8.0$  Hz, 1H), 7.62 (ddd,  $J = 1.4, 7.1, 8.3$  Hz, 1H), 7.39 (ddd,  $J = 1.0, 7.0, 8.0$  Hz, 1H), 4.48 (tt,  $J = 3.7, 12.3$  Hz, 1H), 3.19 (s, 1H), 2.60–2.47 (m, 2H), 1.92–1.85 (m, 2H), 1.75–1.67 (m, 3H), 1.51–1.29 (m, 3H), 1.13 (s, 9H).

$^{13}C$ -NMR (125 MHz,  $CDCl_3$ ,  $\delta$ ): 176.17 (C), 157.33 (C), 146.70 (C), 132.17 (CH), 129.20 (CH), 127.81 (CH), 127.70 (CH), 125.27 (C), 124.20 (CH), 123.06 (C), 53.81 (CH), 51.91 (CH), 35.38 (C), 28.85 (CH $_2$ ), 28.58 (CH $_2$ ), 27.35 (CH $_3 \times 3$ ), 26.09 (CH $_2$ ), 26.06 (CH $_2$ ), 25.36 (CH $_2$ ).

HRMS-ESI ( $m/z$ ):  $[M+Na]^+$  calcd for  $C_{21}H_{26}N_2NaO$ , 345.1937; found, 345.1931.

**3-*tert*-Butyl-1-phenyl-1*H*-pyrrolo[2,3-*b*]quinolin-2(3*H*)-one (15l).**

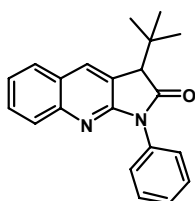

Yellow solid; mp: 90.4–91.1 °C.

IR (KBr/ $cm^{-1}$ ): 3055, 2947, 1728, 1635, 1589, 1496, 1427, 1358, 1227, 1165, 748.

$^1H$ -NMR (500 MHz,  $CDCl_3$ ,  $\delta$ ): 7.98 (s, 1H), 7.85 (d,  $J = 8.3$  Hz, 1H), 7.75 (dd,  $J = 8.0, 1.2$  Hz, 1H), 7.62–7.52 (m, 5H), 7.44–7.38 (m, 2H), 3.43 (d,  $J = 1.2$  Hz, 1H), 1.22 (s, 9H).

$^{13}C$ -NMR (125 MHz,  $CDCl_3$ ,  $\delta$ ): 175.48 (C), 156.92 (C), 146.58 (C), 133.35 (C), 132.97 (CH), 129.42 (CH), 129.00 (CH $\times 2$ ), 128.02 (CH), 127.97 (CH), 127.76 (CH), 126.92 (CH $\times 2$ ), 125.87 (C), 124.65 (CH), 122.59 (C), 54.07 (CH), 35.85 (C), 27.39



(CH<sub>3</sub>×3).

HRMS-ESI (*m/z*): [M+Na]<sup>+</sup> calcd for C<sub>21</sub>H<sub>20</sub>N<sub>2</sub>NaO, 339.1468; found, 339.1462.

**3-Phenyl-1-propyl-1*H*-pyrrolo[2,3-*b*]quinolin-2(3*H*)-one (15m).**

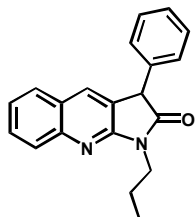

Yellow solid; mp: 102.1–103.7 °C.

IR (KBr/ cm<sup>-1</sup>): 2962, 1720, 1643, 1442, 1365, 1211, 1095, 725.

<sup>1</sup>H-NMR (500 MHz, CDCl<sub>3</sub>, δ): 7.96 (d, *J* = 8.4 Hz, 1H), 7.74 (s, 1H), 7.66 (d, *J* = 7.9 Hz, 1H), 7.64 (dd, *J* = 7.1, 7.1 Hz, 1H), 7.42–7.28 (m, 4H), 7.24–7.20 (m, 2H), 4.71 (s, 1H), 1.84 (t, *J* = 7.3 Hz, 2H), 1.54 (tq, *J* = 7.4, 7.4 Hz, 2H), 1.00 (t, *J* = 7.5 Hz, 3H).

<sup>13</sup>C-NMR (125 MHz, CDCl<sub>3</sub>, δ): 175.45 (C), 156.81 (C), 147.18 (C), 136.03 (C), 131.75 (CH), 129.55 (CH), 129.06 (CH×2), 128.29 (CH×2), 127.93 (CH), 127.88 (CH), 127.83 (CH), 126.13 (C), 124.53 (CH), 124.43 (C), 50.60 (CH), 41.19 (CH<sub>2</sub>), 20.87 (CH<sub>2</sub>), 11.35 (CH<sub>3</sub>).

HRMS-ESI (*m/z*): [M+Na]<sup>+</sup> calcd for C<sub>20</sub>H<sub>18</sub>N<sub>2</sub>NaO, 325.1311; found, 325.1327.

Anal calcd for C<sub>20</sub>H<sub>18</sub>N<sub>2</sub>O: C 79.44, H 6.00, N 9.26, found: C 79.82, H 6.04, N 8.97.

**1-Benzyl-3-phenyl-1*H*-pyrrolo[2,3-*b*]quinolin-2(3*H*)-one (15n).**

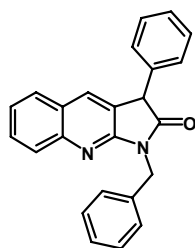

Brown solid; mp: 135.0–135.8 °C.

IR (KBr/ cm<sup>-1</sup>): 3032, 1728, 1635, 1581, 1442, 1358, 1173, 1026, 849, 725.

<sup>1</sup>H-NMR (500 MHz, CDCl<sub>3</sub>, δ): 7.98 (d, *J* = 8.4 Hz, 1H), 7.73 (s, 1H), 7.66–7.61 (m, 2H), 7.58 (d, *J* = 7.6 Hz, 2H), 7.38 (dd, *J* = 7.5, 7.5 Hz, 1H), 7.35–7.26 (m, 5H), 7.25–7.21 (m, 1H), 7.18 (d, *J* = 7.5 Hz, 2H), 5.19 (d, *J* = 14.3 Hz, 1H), 5.11 (d, *J* = 14.4 Hz, 1H), 4.72 (s, 1H).

<sup>13</sup>C-NMR (125 MHz, CDCl<sub>3</sub>, δ): 175.21 (C), 156.31 (C), 147.11 (C), 136.62 (C), 135.82 (C), 131.96 (CH), 129.59 (CH), 129.06 (CH×2), 128.81 (CH×2), 128.48 (CH×2), 128.31 (CH×2), 127.99 (CH), 127.91 (CH), 127.91 (CH), 127.61 (CH), 124.47 (C), 124.63 (CH), 124.26 (C), 50.66 (CH), 43.07 (CH<sub>2</sub>).

HRMS-ESI (*m/z*): [M+Na]<sup>+</sup> calcd for C<sub>24</sub>H<sub>18</sub>N<sub>2</sub>NaO, 373.1311; found, 373.1316.

**1-Cyclohexyl-3-phenyl-1*H*-pyrrolo[2,3-*b*]quinolin-2(3*H*)-one (15o).**

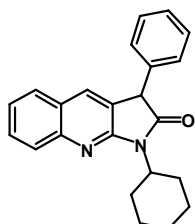

Yellow solid; mp: 185.0–187.2 °C.

IR (KBr/ cm<sup>-1</sup>): 2924, 2854, 1720, 1643, 1581, 1427, 1211, 1072, 756, 663.

<sup>1</sup>H-NMR (600 MHz, CDCl<sub>3</sub>, δ): 7.96 (d, *J* = 8.3 Hz, 1H), 7.74 (s, 1H), 7.67–7.62 (m, 2H), 7.41–7.28 (m, 4H), 7.21 (d, *J* = 6.9

Hz, 2H), 4.67 (s, 1H), 4.53 (tt,  $J = 3.9, 12.3$  Hz, 1H), 2.60 (ddt,  $J = 3.6, 12.6, 12.6$  Hz, 1H), 2.55 (ddt,  $J = 3.6, 12.6, 12.6$  Hz, 1H), 1.95–1.87 (m, 2H), 1.83–1.70 (m, 3H), 1.52–1.41 (m, 2H), 1.36 (tt,  $J = 3.2, 12.5$  Hz, 1H).

$^{13}\text{C}$ -NMR (125 MHz,  $\text{CDCl}_3$ ,  $\delta$ ): 175.36 (C), 156.97 (C), 147.03 (C), 136.42 (C), 131.61 (CH), 129.45 (CH), 129.06 (CH $\times 2$ ), 128.26 (CH $\times 2$ ), 128.26 (C), 128.20 (CH), 127.83 (CH $\times 2$ ), 125.80 (C), 124.51 (CH), 52.38 (CH), 50.63 (CH), 28.91 (CH $\times 2$ ), 28.79 (CH $\times 2$ ), 26.05 (CH $\times 2$ ), 26.01 (CH $\times 2$ ), 25.31 (CH $\times 2$ ).

HRMS-ESI ( $m/z$ ):  $[\text{M}+\text{H}]^+$  calcd for  $\text{C}_{23}\text{H}_{23}\text{N}_2\text{O}$ , 343.1805; found, 343.1817.

### 1,3-Diphenyl-1*H*-pyrrolo[2,3-*b*]quinolin-2(3*H*)-one (15p).

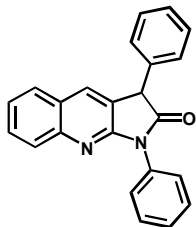

Yellow solid; mp: 227.3–228.1 °C.

IR (KBr/ $\text{cm}^{-1}$ ): 3062, 1728, 1643, 1496, 1427, 1219, 756, 694.

$^1\text{H}$ -NMR (500 MHz,  $\text{CDCl}_3$ ,  $\delta$ ): 7.91 (d,  $J = 8.6$  Hz, 1H), 7.89 (s, 1H), 7.72 (d,  $J = 8.2$  Hz, 1H), 7.68 (d,  $J = 8.1$  Hz, 2H), 7.63 (dd,  $J = 7.6, 7.6$  Hz, 1H), 7.56 (dd,  $J = 7.9, 7.9$  Hz, 2H), 7.46–7.32 (m, 7H), 4.92 (s, 1H).

$^{13}\text{C}$ -NMR (125 MHz,  $\text{CDCl}_3$ ,  $\delta$ ): 174.62 (C), 156.49 (C), 146.92 (C), 135.95 (C), 133.31 (C), 132.51 (CH), 129.70 (CH), 129.17 (CH $\times 2$ ), 129.02 (CH $\times 2$ ), 128.41 (CH $\times 2$ ), 128.29 (CH), 128.07 (CH), 128.07 (CH), 127.79 (CH), 126.76 (CH $\times 2$ ), 126.44 (C), 124.96 (CH), 123.91 (C), 50.69 (CH).

HRMS-ESI ( $m/z$ ):  $[\text{M}+\text{Na}]^+$  calcd for  $\text{C}_{23}\text{H}_{16}\text{N}_2\text{NaO}$ , 359.1155; found, 359.1155.

Anal calcd for  $\text{C}_{23}\text{H}_{16}\text{N}_2\text{O}$ : C 82.12, H 4.79, N 8.33, found: C 81.74, H 4.88, N 8.22.

### 3-(*tert*-Butyldimethylsilyl)-1-propyl-1*H*-pyrrolo[2,3-*b*]quinolin-2(3*H*)-one (15q).

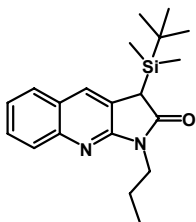

Brown oil.

IR (neat/ $\text{cm}^{-1}$ ): 2954, 2862, 1705, 1635, 1358, 1219, 1049, 833, 733.

$^1\text{H}$ -NMR (600 MHz,  $\text{CDCl}_3$ ,  $\delta$ ): 7.92 (d,  $J = 8.3$  Hz, 1H), 7.70 (d,  $J = 7.0$  Hz, 1H), 7.69 (s, 1H), 7.60 (dd,  $J = 7.0, 8.1$  Hz, 1H), 7.38 (dd,  $J = 7.0, 8.0$  Hz, 1H), 3.98–3.83 (m, 2H), 3.50 (s, 1H), 1.90–1.76 (m, 2H), 1.02 (t,  $J = 7.5$  Hz, 3H), 0.90 (s, 9H), 0.26 (s, 3H), 0.15 (s, 3H).

$^{13}\text{C}$ -NMR (150 MHz,  $\text{CDCl}_3$ ,  $\delta$ ): 176.84 (C), 156.55 (C), 146.17 (C), 128.74 (CH), 128.64 (CH), 127.61 (CH), 127.49 (CH), 125.75 (C), 124.07 (CH), 124.05 (C), 41.07 (CH $\times 2$ ), 38.27 (CH), 26.95 (CH $\times 3$ ), 21.04 (CH $\times 2$ ), 18.22 (C), 11.51 (CH $\times 3$ ), -5.55 (CH $\times 3$ ), -6.28 (CH $\times 3$ ).

HRMS-ESI ( $m/z$ ):  $[\text{M}+\text{Na}]^+$  calcd for  $\text{C}_{20}\text{H}_{28}\text{N}_2\text{NaOSi}$ , 363.1863; found, 363.1860.

### 1-Benzyl-3-(*tert*-butyldimethylsilyl)-1*H*-pyrrolo[2,3-*b*]quinolin-2(3*H*)-one (15r).

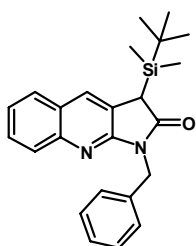

Brown solid; mp: 112.5–113.1 °C.

IR (KBr/ cm<sup>-1</sup>): 2947, 2854, 1697, 1628, 1581, 1435, 1358, 1072, 910, 841, 741.

<sup>1</sup>H-NMR (600MHz, CDCl<sub>3</sub>, δ): 7.96 (d, *J* = 8.4 Hz, 1H), 7.69 (d, *J* = 7.8 Hz, 1H), 7.68 (s, 1H), 7.63–7.59 (m, 3H), 7.38 (dd, *J* = 7.6, 7.6 Hz, 1H), 7.27 (dd, *J* = 7.7, 7.7 Hz, 2H), 7.24–7.20 (m, 1H), 5.12 (s, 2H), 3.49 (d, *J* = 1.0 Hz, 1H), 0.80 (s, 9H), 0.20 (s, 3H), 0.06 (s, 3H).

<sup>13</sup>C-NMR (150 MHz, CDCl<sub>3</sub>, δ): 176.47 (C), 156.11 (C), 146.15 (C), 136.89 (C), 129.20 (CH×2), 128.89 (CH), 128.66 (CH), 128.33 (CH×2), 127.79 (CH), 127.49 (CH×2), 125.93 (C), 124.16 (CH), 124.02 (C), 42.92 (CH<sub>2</sub>), 38.38 (CH), 26.87 (CH<sub>3</sub>×3), 18.15 (C), -5.54 (CH<sub>3</sub>), -6.32 (CH<sub>3</sub>).

HRMS-ESI (*m/z*): [M+Na]<sup>+</sup> calcd for C<sub>24</sub>H<sub>28</sub>N<sub>2</sub>NaOSi, 411.1863; found, 411.1873.

### 3-(*tert*-Butyldimethylsilyl)-1-cyclohexyl-1*H*-pyrrolo[2,3-*b*]quinolin-2(3*H*)-one (15s).

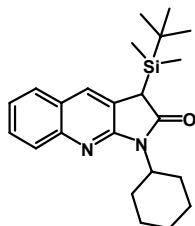

Brown oil.

IR (neat/ cm<sup>-1</sup>): 2978, 2129, 1736, 1612, 1466, 1196, 748.

<sup>1</sup>H-NMR (600 MHz, CDCl<sub>3</sub>, δ): 7.97 (d, *J* = 8.4 Hz, 1H), 7.75 (d, *J* = 7.9 Hz, 1H), 7.73 (s, 1H), 7.65 (ddd, *J* = 1.5, 7.0, 7.0 Hz, 1H), 7.44 (ddd, *J* = 1.0, 7.0, 7.0 Hz, 1H), 4.57 (tt, *J* = 4.0, 12.5 Hz, 1H), 3.52 (d, *J* = 1.2 Hz, 1H), 2.67–2.55 (m, 2H), 1.98–1.92 (m, 2H), 1.82–1.75 (m, 2H), 1.57–1.47 (m, 2H), 1.45–1.35 (m, 2H), 0.95 (s, 9H), 0.30 (s, 3H), 0.21 (s, 3H).

<sup>13</sup>C-NMR (150 MHz, CDCl<sub>3</sub>, δ): 176.81 (C), 156.56 (C), 145.95 (C), 128.52 (CH), 128.50 (CH), 127.72 (CH), 127.36 (CH), 125.38 (C), 124.02 (CH), 124.02 (C), 52.05 (CH), 38.51 (CH), 28.89 (CH<sub>2</sub>), 28.68 (CH<sub>2</sub>), 27.00 (CH<sub>3</sub>×3), 26.10 (CH<sub>2</sub>), 26.07 (CH<sub>2</sub>), 25.33 (CH<sub>2</sub>), 18.28 (C), -5.54 (CH<sub>3</sub>), -6.26 (CH<sub>3</sub>).

HRMS-ESI (*m/z*): [M+Na]<sup>+</sup> calcd for C<sub>24</sub>H<sub>28</sub>N<sub>2</sub>NaOSi, 411.1863; found, 411.1873.

### 3-(*tert*-Butyldimethylsilyl)-1-phenyl-1*H*-pyrrolo[2,3-*b*]quinolin-2(3*H*)-one (15t).

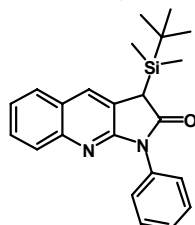

Brown oil.

IR (neat/ cm<sup>-1</sup>): 3016, 1712, 1635, 1427, 1219, 756.

<sup>1</sup>H-NMR (600 MHz, CDCl<sub>3</sub>, δ): 7.87 (d, *J* = 8.4 Hz, 1H), 7.80 (s, 1H), 7.73 (dd, *J* = 1.0, 7.9 Hz, 1H), 7.62 (d, *J* = 8.2 Hz, 2H), 7.60–7.53 (m, 3H), 7.44–7.39 (m, 2H), 3.70 (d, *J* = 1.2 Hz, 1H), 0.91 (s, 9H), 0.32 (s, 3H), 0.26 (s, 3H).

<sup>13</sup>C-NMR (150 MHz, CDCl<sub>3</sub>, δ): 176.00 (C), 156.08 (C), 145.87 (C), 133.65 (C), 129.24 (CH), 129.03 (CH×2), 128.73 (CH), 128.08 (CH), 127.83 (CH), 127.33 (CH), 126.74 (CH×2), 126.03 (C), 124.52 (CH), 123.57 (C), 38.72 (CH), 27.03 (CH<sub>3</sub>×3), 18.39 (C), -5.55 (CH<sub>3</sub>), -6.08 (CH<sub>3</sub>).

HRMS-ESI (*m/z*): [M+Na]<sup>+</sup> calcd for C<sub>23</sub>H<sub>26</sub>N<sub>2</sub>NaOSi, 397.1707; found, 397.1698.

### 1-Propyl-1*H*-pyrrolo[2,3-*b*]quinolin-2(3*H*)-one (15u).

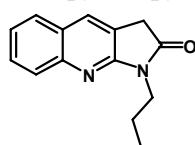

Brown oil.

IR (neat/  $\text{cm}^{-1}$ ): 2946, 1712, 1643, 1581, 1365, 1219, 1103, 849, 756.

$^1\text{H-NMR}$  (500 MHz,  $\text{CDCl}_3$ ,  $\delta$ ): 7.92 (d,  $J=8.2$  Hz, 1H), 7.82 (s, 1H), 7.71 (d,  $J=8.1$  Hz, 1H), 7.63 (dd,  $J=7.6, 7.6$  Hz, 1H), 7.40 (dd,  $J=7.4, 7.4$  Hz, 1H), 3.91 (t,  $J=7.4$  Hz, 2H), 3.62 (s, 2H), 1.84 (tq,  $J=7.5, 7.5$  Hz, 2H), 1.01 (t,  $J=7.5$  Hz, 3H).

$^{13}\text{C-NMR}$  (125 MHz,  $\text{CDCl}_3$ ,  $\delta$ ): 174.41 (C), 157.42 (C), 146.90 (C), 130.76 (CH), 129.27 (CH), 127.80 (CH), 127.68 (CH), 125.95 (C), 124.44 (CH), 119.81 (C), 41.01 ( $\text{CH}_2$ ), 34.09 ( $\text{CH}_2$ ), 20.80 ( $\text{CH}_2$ ), 11.38 ( $\text{CH}_3$ ).

HRMS-ESI ( $m/z$ ):  $[\text{M}+\text{Na}]^+$  calcd for  $\text{C}_{14}\text{H}_{14}\text{N}_2\text{NaO}$ , 249.0998; found, 249.1002.

**Typical procedure for the catalytic Pauson–Khand reaction using  $[\text{Rh}(\text{CO})_2\text{Cl}]_2$  to produce 17 and 18 (Table 3, Entry 3), and 19a and 20.** A solution of  $[\text{Rh}(\text{CO})_2\text{Cl}]_2$  (14.0 mg, 0.036 mmol) in *p*-xylene (5 mL) was degassed, charged with carbon monoxide, and was heated to 130 °C. A solution of carbodiimide **5c** (138.4 mg, 0.516 mmol) in *p*-xylene (1 mL) was added, and the mixture was heated at the same temperature for 2.0 h. The mixture was evaporated, and the residue was purified by silica gel column chromatography (ethyl acetate/hexane = 1:10) to give pyrroloquinoline **17c** (13.1 mg, 0.041 mmol, 8% as a yellow oil) and **18a** (94.9 mg, 0.299 mmol, 58%).

### 3,4-Dimethyl-1-propyl-1*H*-pyrrolo[2,3-*b*]quinolin-2(3*H*)-one (17a).

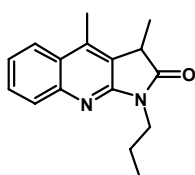

Brown solid; mp: 89.7–90.3 °C.

IR (KBr/  $\text{cm}^{-1}$ ): 3070, 2962, 1720, 1635, 1581, 1465, 1265, 1119, 748.

$^1\text{H-NMR}$  (500 MHz,  $\text{CDCl}_3$ ,  $\delta$ ): 7.92–7.86 (m, 2H), 7.61 (ddd,  $J=1.4, 7.0, 8.2$  Hz, 1H), 7.42 (ddd,  $J=1.2, 6.9, 8.2$  Hz, 1H), 3.94–3.83 (m, 2H), 3.57 (q,  $J=7.7$  Hz, 1H), 2.60 (s, 3H), 1.83 (tq,  $J=7.4, 7.4$  Hz, 2H), 1.56 (d,  $J=7.7$  Hz, 3H), 0.98 (t,  $J=7.5$  Hz, 3H).

$^{13}\text{C-NMR}$  (125 MHz,  $\text{CDCl}_3$ ,  $\delta$ ): 178.21 (C), 156.07 (C), 146.69 (C), 138.56 (C), 128.92 (CH), 128.28 (CH), 126.24 (C), 124.12 (CH), 123.43 (CH), 123.43 (C), 40.73 ( $\text{CH}_2$ ), 38.99 (CH), 20.86 ( $\text{CH}_2$ ), 15.81 ( $\text{CH}_3$ ), 14.52 ( $\text{CH}_3$ ), 11.30 ( $\text{CH}_3$ ).

HRMS-ESI ( $m/z$ ):  $[\text{M}+\text{Na}]^+$  calcd for  $\text{C}_{16}\text{H}_{18}\text{N}_2\text{NaO}$ , 277.1311; found, 277.1312.

### 3,4-Dimethyl-1-phenyl-1*H*-pyrrolo[2,3-*b*]quinolin-2(3*H*)-one (17b).

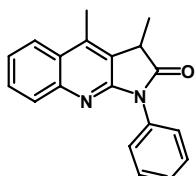

Brown solid; mp: 185.2–186.7 °C.

IR (KBr/  $\text{cm}^{-1}$ ): 3062, 2969, 1720, 1635, 1589, 1435, 1227, 748.

$^1\text{H-NMR}$  (500 MHz,  $\text{CDCl}_3$ ,  $\delta$ ): 7.91 (d,  $J=8.3$  Hz, 1H), 7.85 (d,  $J=8.4$  Hz, 1H), 7.63 (d,  $J=8.1$  Hz, 2H), 7.59 (dd,  $J=7.6, 7.6$  Hz, 1H), 7.53 (dd,  $J=7.7, 7.7$  Hz, 2H), 7.46–7.38 (m, 2H), 3.76 (dt,  $J=7.4, 7.4$  Hz, 1H), 2.66 (s, 3H), 1.68 (d,  $J=7.4$  Hz, 3H).

$^{13}\text{C-NMR}$  (125 MHz,  $\text{CDCl}_3$ ,  $\delta$ ): 177.40 (C), 155.77 (C), 146.36 (C), 139.42 (C), 133.30 (C), 129.03 (CH), 128.93 ( $\text{CH}\times 2$ ), 128.71 (CH), 127.86 (CH), 126.76 ( $\text{CH}\times 2$ ), 126.48 (C), 124.53 (CH), 123.29 (CH), 122.98 (C), 39.14 (CH), 16.11 ( $\text{CH}_3$ ), 14.67 ( $\text{CH}_3$ ).

HRMS-ESI ( $m/z$ ):  $[\text{M}+\text{Na}]^+$  calcd for  $\text{C}_{19}\text{H}_{16}\text{N}_2\text{NaO}$ , 311.1155; found, 311.1145.

### 3-*tert*-butyl-4-methyl-1-propyl-1*H*-pyrrolo[2,3-*b*]quinolin-2(4*H*)-one (18a).

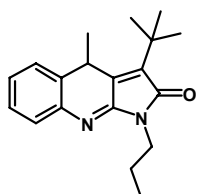

Yellow oil.

IR (neat/  $\text{cm}^{-1}$ ): 3062, 2962, 1712, 1635, 1450, 1365, 1088, 941, 764.

$^1\text{H-NMR}$  (600 MHz,  $\text{CDCl}_3$ ,  $\delta$ ): 7.42 (dd,  $J = 1.1, 7.8$  Hz, 1H), 7.26 (ddd,  $J = 1.6, 7.5, 7.6$  Hz, 1H), 7.18 (dd,  $J = 1.5, 7.6$  Hz, 1H), 7.13 (ddd, 1.2, 7.4, 7.4 Hz, 1H), 4.31 (q,  $J = 7.3$  Hz, 1H), 3.75–3.65 (m, 2H), 1.73 (dtq,  $J = 1.2, 7.4, 7.4$  Hz, 2H), 1.45 (s, 9H), 1.39 (d,  $J = 7.4$  Hz, 3H), 0.94 (t,  $J = 7.5$  Hz, 3H).

$^{13}\text{C-NMR}$  (150 MHz,  $\text{CDCl}_3$ ,  $\delta$ ): 170.32 (C), 155.57 (C), 141.87 (C), 141.64 (C), 134.08 (C), 132.00 (C), 128.16 (CH), 127.87 (CH), 127.62 (CH), 125.91 (CH), 40.10 ( $\text{CH}_2$ ), 34.51 (C), 33.11 (CH), 29.27 ( $\text{CH}_3 \times 3$ ), 28.16 ( $\text{CH}_3$ ), 21.91 ( $\text{CH}_2$ ), 11.36 ( $\text{CH}_3$ )

HRMS-ESI ( $m/z$ ):  $[\text{M}+\text{Na}]^+$  calcd for  $\text{C}_{19}\text{H}_{24}\text{N}_2\text{NaO}$ , 319.1781; found, 319.1782.

### 3-*tert*-Butyl-4-methyl-1-propyl-1*H*-pyrrolo[2,3-*b*]quinolin-2(3*H*)-one (17c).

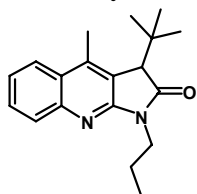

Yellow oil.

IR (KBr/  $\text{cm}^{-1}$ ): 3070, 2962, 1720, 1628, 1466, 1358, 1288, 1219, 1103, 756.

$^1\text{H-NMR}$  (600 MHz,  $\text{CDCl}_3$ ,  $\delta$ ): 7.89 (d,  $J = 8.8$  Hz, 2H), 7.62 (ddd,  $J = 1.4, 7.0, 8.3$  Hz, 1H), 7.42 (ddd,  $J = 1.2, 6.9, 8.3$  Hz, 1H), 3.90–3.84 (m, 1H), 3.81–3.74 (m, 1H), 3.33 (s, 1H), 2.60 (s, 3H), 1.88–1.74 (m, 2H), 1.08 (s, 9H), 1.01 (t,  $J = 7.6$  Hz, 3H).

$^{13}\text{C-NMR}$  (150 MHz,  $\text{CDCl}_3$ ,  $\delta$ ): 177.04 (C), 157.19 (C), 146.39 (C), 139.58 (C), 128.98 (CH), 128.00 (CH), 126.29 (C), 124.03 (CH), 123.82 (CH), 122.10 (C), 53.87 (CH), 40.58 ( $\text{CH}_2$ ), 37.84 (C), 28.07 ( $\text{CH}_3 \times 3$ ), 21.00 ( $\text{CH}_2$ ), 17.91 ( $\text{CH}_3$ ), 11.61 ( $\text{CH}_3$ ).

HRMS-ESI ( $m/z$ ):  $[\text{M}+\text{Na}]^+$  calcd for  $\text{C}_{19}\text{H}_{24}\text{N}_2\text{NaO}$ , 319.1781; found, 319.1775.

### 3-*tert*-butyl-4-methyl-1-propyl-1*H*-pyrrolo[2,3-*b*]quinolin-2(4*H*)-one (18a).

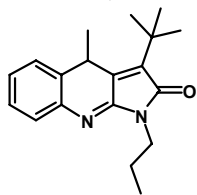

Yellow oil.

IR (neat/  $\text{cm}^{-1}$ ): 3062, 2962, 1712, 1635, 1450, 1365, 1088, 941, 764.

$^1\text{H-NMR}$  (600 MHz,  $\text{CDCl}_3$ ,  $\delta$ ): 7.42 (dd,  $J = 1.1, 7.8$  Hz, 1H), 7.26 (ddd,  $J = 1.6, 7.5, 7.6$  Hz, 1H), 7.18 (dd,  $J = 1.5, 7.6$  Hz, 1H), 7.13 (ddd, 1.2, 7.4, 7.4 Hz, 1H), 4.31 (q,  $J = 7.3$  Hz, 1H), 3.75–3.65 (m, 2H), 1.73 (dtq,  $J = 1.2, 7.4, 7.4$  Hz, 2H), 1.45 (s, 9H), 1.39 (d,  $J = 7.4$  Hz, 3H), 0.94 (t,  $J = 7.5$  Hz, 3H).

$^{13}\text{C-NMR}$  (150 MHz,  $\text{CDCl}_3$ ,  $\delta$ ): 170.32 (C), 155.57 (C), 141.87 (C), 141.64 (C), 134.08 (C), 132.00 (C), 128.16 (CH), 127.87 (CH), 127.62 (CH), 125.91 (CH), 40.10 ( $\text{CH}_2$ ), 34.51 (C), 33.11 (CH), 29.27 ( $\text{CH}_3 \times 3$ ), 28.16 ( $\text{CH}_3$ ), 21.91 ( $\text{CH}_2$ ), 11.36 ( $\text{CH}_3$ )

HRMS-ESI ( $m/z$ ):  $[\text{M}+\text{Na}]^+$  calcd for  $\text{C}_{19}\text{H}_{24}\text{N}_2\text{NaO}$ , 319.1781; found, 319.1782.

### 3-*tert*-Butyl-4-methyl-1-phenyl-1*H*-pyrrolo[2,3-*b*]quinolin-2(3*H*)-one (17d).

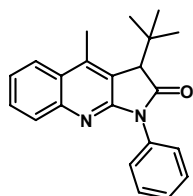

Yellow solid; mp: 157.8–158.8 °C.

IR (KBr/  $\text{cm}^{-1}$ ): 3054, 2954, 1727, 1427, 1288, 1227, 1173, 918, 764.

$^1\text{H-NMR}$  (600 MHz,  $\text{CDCl}_3$ ,  $\delta$ ): 7.91 (dd,  $J = 1.0, 8.2$  Hz, 1H), 7.83 (d,  $J = 8.3$  Hz, 1H), 7.61–7.56 (m, 3H), 7.55–7.51 (m, 2H), 7.45–7.39 (m, 2H), 3.52 (s, 1H), 2.66 (s, 3H), 1.16 (s, 9H).

$^{13}\text{C-NMR}$  (150 MHz,  $\text{CDCl}_3$ ,  $\delta$ ): 176.17 (C), 156.84 (C), 146.03 (C), 140.40 (C), 133.27 (C), 129.05 (CH), 128.98 (CH $\times$ 2), 128.46 (CH), 127.88 (CH), 126.90 (CH $\times$ 2), 126.47 (C), 124.42 (CH), 123.66 (CH), 121.47 (C), 53.02 (CH), 38.57 (C), 27.95 (CH $_3$  $\times$ 3), 17.96 (CH $_3$ ).

HRMS-ESI ( $m/z$ ):  $[\text{M}+\text{Na}]^+$  calcd for  $\text{C}_{22}\text{H}_{22}\text{N}_2\text{NaO}$ , 353.1624; found, 353.1634.

### 3-*tert*-Butyl-4-methyl-1-phenyl-1*H*-pyrrolo[2,3-*b*]quinolin-2(4*H*)-one (18b).

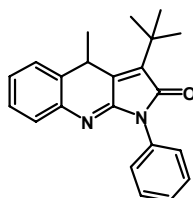

Yellow oil.

IR (neat/  $\text{cm}^{-1}$ ): 3062, 2954, 1720, 1627, 1589, 1496, 1427, 1227, 918, 764.

$^1\text{H-NMR}$  (500 MHz,  $\text{CDCl}_3$ ,  $\delta$ ): 7.54 (d,  $J = 8.0$  Hz, 2H), 7.48 (dd,  $J = 7.9, 7.9$  Hz, 2H), 7.40 (d,  $J = 7.7$  Hz, 1H), 7.35 (dd,  $J = 7.4, 7.4$  Hz, 1H), 7.27–7.19 (m, 2H), 7.16 (dd,  $J = 7.4, 7.4$  Hz, 1H), 4.43 (q,  $J = 7.2$  Hz, 1H), 1.51 (s, 9H), 1.47 (d,  $J = 7.2$  Hz, 3H).

$^{13}\text{C-NMR}$  (125 MHz,  $\text{CDCl}_3$ ,  $\delta$ ): 169.23 (C), 155.01 (C), 141.47 (C), 141.37 (C), 134.96 (C), 133.07 (C), 131.92 (C), 128.67 (CH), 128.67 (CH $\times$ 2), 127.68 (CH), 127.66 (CH), 127.07 (CH), 127.03 (CH $\times$ 2), 126.40 (CH), 34.76 (C), 33.28 (CH), 29.31 (CH $_3$  $\times$ 3), 28.35 (CH $_3$ ).

HRMS-ESI ( $m/z$ ):  $[\text{M}+\text{Na}]^+$  calcd for  $\text{C}_{22}\text{H}_{22}\text{N}_2\text{NaO}$ , 353.1624; found, 353.1624.

### 4-Methyl-3-phenyl-1-propyl-1*H*-pyrrolo[2,3-*b*]quinolin-2(3*H*)-one (17e).

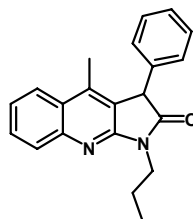

Yellow solid; mp: 193.3–194.2 °C.

IR (KBr/  $\text{cm}^{-1}$ ): 3062, 2962, 1720, 1635, 1589, 1442, 1080, 763.

$^1\text{H-NMR}$  (600 MHz,  $\text{CDCl}_3$ ,  $\delta$ ): 7.97 (d,  $J = 8.3$  Hz, 1H), 7.88 (d,  $J = 8.0$  Hz, 1H), 7.66 (dd,  $J = 7.7, 7.7$  Hz, 1H), 7.43 (dd,  $J = 7.6, 7.6$  Hz, 1H), 7.35–7.27 (m, 3H), 7.18 (d,  $J = 7.5$  Hz, 2H), 4.69 (s, 1H), 3.94–3.88 (m, 2H), 2.31 (s, 3H), 1.85 (tq,  $J = 7.5, 7.5$  Hz, 2H), 0.97 (t,  $J = 7.5$  Hz, 3H).

$^{13}\text{C-NMR}$  (150 MHz,  $\text{CDCl}_3$ ,  $\delta$ ): 175.42 (C), 156.67 (C), 147.12 (C), 140.07 (C), 135.70 (C), 129.29 (CH), 129.06 (CH $\times$ 2), 128.43 (CH), 128.07 (CH $\times$ 2), 127.78 (CH), 126.39 (C), 124.28 (CH), 123.68 (CH), 121.96 (C), 50.44 (CH), 41.04 (CH $_2$ ), 20.88 (CH $_2$ ), 14.86 (CH $_3$ ), 11.33 (CH $_3$ ).

HRMS-ESI ( $m/z$ ):  $[\text{M}+\text{H}]^+$  calcd for  $\text{C}_{21}\text{H}_{21}\text{N}_2\text{O}$ , 317.1648; found, 317.1646.

**4-Methyl-1,3-diphenyl-1*H*-pyrrolo[2,3-*b*]quinolin-2(3*H*)-one (17f).**

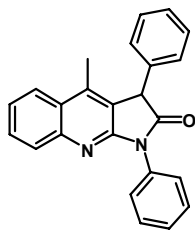

Yellow solid; mp: 218.8–219.5 °C.

IR (KBr/ cm<sup>-1</sup>): 3055, 2985, 2306, 1581, 1489, 1412, 1265, 740.

<sup>1</sup>H-NMR (600 MHz, CDCl<sub>3</sub>, δ): 7.92 (d, *J* = 8.3 Hz, 2H), 7.66–7.62 (m, 3H), 7.53 (dd, *J* = 7.9, 7.9 Hz, 2H), 7.46 (ddd, *J* = 1.2, 7.0, 8.1 Hz, 1H), 7.41 (dd, *J* = 7.4, 7.4 Hz, 1H), 7.38–7.31 (m, 3H), 7.29–7.26 (m, 2H), 4.90 (s, 1H), 2.39 (s, 3H).

<sup>13</sup>C-NMR (150 MHz, CDCl<sub>3</sub>, δ): 174.58 (C), 156.36 (C), 146.82 (C), 140.97 (C), 135.57 (C), 133.20 (C), 129.42 (CH), 129.16 (2CH), 128.96 (2CH), 128.90 (CH), 128.19 (2CH), 127.98 (CH), 127.95 (CH), 126.81 (2CH), 126.65 (C), 124.70 (CH), 123.55 (CH), 121.46 (C), 50.50 (CH), 15.04 (CH<sub>3</sub>).

HRMS-ESI (*m/z*): [M+H]<sup>+</sup> calcd for C<sub>24</sub>H<sub>18</sub>N<sub>2</sub>O, 373.1311; found, 373.1321.

**3-(*tert*-Butyldimethylsilyl)-4-methyl-1-propyl-1*H*-pyrrolo[2,3-*b*]quinolin-2(3*H*)-one (17g).**

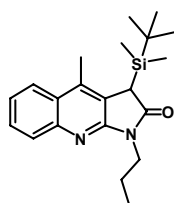

Brown solid; mp: 99.8–100.1 °C.

IR (KBr/ cm<sup>-1</sup>): 3062, 2931, 2854, 1712, 1628, 1581, 1442, 1219, 1049, 841, 756.

<sup>1</sup>H-NMR (500 MHz, CDCl<sub>3</sub>, δ): 7.91 (dd, *J* = 1.0, 8.3 Hz, 1H), 7.85 (dd, *J* = 1.2, 8.2 Hz, 1H), 7.59 (ddd, *J* = 1.3, 6.9, 8.3 Hz, 1H), 7.40 (ddd, *J* = 1.3, 6.9, 8.2 Hz, 1H), 3.93–3.86 (m, 1H), 3.85–3.78 (m, 1H), 3.64 (s, 1H), 2.52 (s, 3H), 1.90–1.75 (m, 2H), 1.09 (s, 9H), 1.01 (t, *J* = 7.5 Hz, 3H), 0.01 (d, *J* = 3.2 Hz, 6H).

<sup>13</sup>C-NMR (125 MHz, CDCl<sub>3</sub>, δ): 177.45 (C), 156.06 (C), 145.93 (C), 135.48 (C), 128.30 (CH), 128.07 (CH), 126.08 (C), 123.82 (CH), 123.30 (CH), 122.72 (C), 40.92 (CH<sub>2</sub>), 37.44 (CH), 26.80 (CH<sub>3</sub>×3), 21.17 (CH<sub>2</sub>), 18.10 (C), 16.68 (CH<sub>3</sub>), 11.56 (CH<sub>3</sub>), -5.00 (CH<sub>3</sub>), -6.04 (CH<sub>3</sub>).

HRMS-ESI (*m/z*): [M+Na]<sup>+</sup> calcd for C<sub>21</sub>H<sub>30</sub>N<sub>2</sub>NaOSi, 377.2020; found, 377.2016.

**3-(*tert*-Butyldimethylsilyl)-4-methyl-1-phenyl-1*H*-pyrrolo[2,3-*b*]quinolin-2(3*H*)-one (17h).**

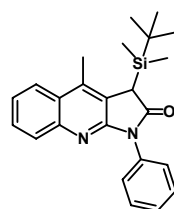

Brown solid; mp: 153.0–154.0 °C.

IR (KBr/ cm<sup>-1</sup>): 3062, 2931, 2854, 1720, 1589, 1496, 1396, 1219, 1041, 818, 764.

<sup>1</sup>H-NMR (500 MHz, CDCl<sub>3</sub>, δ): 7.86 (dd, *J* = 8.3, 12.6 Hz, 2H), 7.61–7.48 (m, 5H), 7.45–7.37 (m, 2H), 3.84 (s, 1H), 2.58 (s, 3H), 1.08 (s, 9H), 0.14 (s, 3H), 0.06 (s, 3H).

<sup>13</sup>C-NMR (125 MHz, CDCl<sub>3</sub>, δ): 176.62 (C), 155.64 (C), 145.64 (C), 136.13 (C), 133.71 (C), 128.96 (CH×2), 128.56 (CH), 128.38 (CH), 127.71 (CH), 126.85 (CH×2), 126.33 (C), 124.25 (CH), 123.17 (CH), 122.22 (C), 37.85 (CH), 26.85 (CH<sub>3</sub>×3), 18.23 (C), 16.75 (CH<sub>3</sub>), -5.06 (CH<sub>3</sub>), -5.87 (CH<sub>3</sub>).

HRMS-ESI (*m/z*): [M+Na]<sup>+</sup> calcd for C<sub>24</sub>H<sub>28</sub>N<sub>2</sub>NaOSi, 411.1863; found, 411.1874.

**4-Methoxy-3,4-dimethyl-1-propyl-1H-pyrrolo[2,3-b]quinolin-2(4H)-one (19a).**

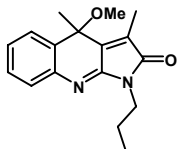

Yellow oil.

IR (neat/  $\text{cm}^{-1}$ ): 2970, 2931, 1720, 1635, 1442, 1103, 756.

$^1\text{H-NMR}$  (600 MHz,  $\text{CDCl}_3$ ,  $\delta$ ): 7.54 (dd,  $J = 1.5, 7.6$  Hz, 1H), 7.44 (dd,  $J = 1.1, 7.7$  Hz, 1H), 7.33 (ddd,  $J = 1.4, 7.7, 7.7$  Hz, 1H), 7.25 (ddd,  $J = 1.3, 7.5, 7.5$  Hz, 1H), 3.76–3.67 (m, 2H), 2.94 (s, 3H), 2.22 (s, 3H), 1.76 (tq,  $J = 7.3, 7.5$  Hz, 2H), 1.64 (s, 3H), 0.96 (t,  $J = 7.5$  Hz, 3H).

$^{13}\text{C-NMR}$  (150 MHz,  $\text{CDCl}_3$ ,  $\delta$ ): 170.74 (C), 156.46 (C), 143.75 (C), 135.83 (C), 133.31 (C), 131.33 (C), 129.04 (CH), 128.51 (CH), 126.75 (CH), 125.97 (CH), 74.40 (C), 52.47 ( $\text{CH}_3$ ), 40.36 ( $\text{CH}_2$ ), 31.01 ( $\text{CH}_3$ ), 21.98 ( $\text{CH}_2$ ), 11.32 ( $\text{CH}_3$ ), 9.12 ( $\text{CH}_3$ ).

HRMS-ESI ( $m/z$ ):  $[\text{M}+\text{Na}]^+$  calcd for  $\text{C}_{17}\text{H}_{20}\text{N}_2\text{NaO}_2$ , 307.1417; found, 307.1415.

**2-tert-Butyl-3-methoxy-3-methyl-1-propyl-1,3-dihydro-1,8-diaza-cyclobuta[b]naphthalene (20).**

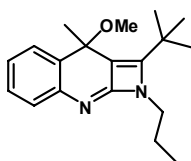

Yellow oil.

IR (neat/  $\text{cm}^{-1}$ ): 2962, 1643, 1219, 1111, 756.

$^1\text{H-NMR}$  (300 MHz,  $\text{CDCl}_3$ ,  $\delta$ ): 7.70 (dd,  $J = 1.3, 8.0$  Hz, 1H), 7.64 (dd,  $J = 1.2, 8.1$  Hz, 1H), 7.45 (ddd,  $J = 1.5, 7.0, 8.2$  Hz, 1H), 7.20 (ddd,  $J = 1.4, 7.0, 8.1$  Hz, 1H), 3.45–3.25 (m, 2H), 3.21 (s, 3H), 2.40 (s, 3H), 1.95–1.78 (m, 2H), 1.13 (s, 9H), 1.01 (t,  $J = 7.4$  Hz, 3H).

$^{13}\text{C-NMR}$  (150 MHz,  $\text{CDCl}_3$ ,  $\delta$ ): 163.90 (C), 149.88 (C), 132.53 (C), 129.20 (C), 128.44 (CH), 126.28 (CH), 126.11 (C), 123.95 (CH), 121.63 (CH), 110.41 (C), 52.43 ( $\text{CH}_3$ ), 45.12 ( $\text{CH}_2$ ), 38.10 (C), 26.27 ( $\text{CH}_3 \times 3$ ), 22.62 ( $\text{CH}_2$ ), 14.84 ( $\text{CH}_3$ ), 11.84 ( $\text{CH}_3$ ).

HRMS-ESI ( $m/z$ ):  $[\text{M}+\text{H}]^+$  calcd for  $\text{C}_{19}\text{H}_{27}\text{N}_2\text{O}$ , 299.2118; found, 299.2104.



### Copies of $^1\text{H}$ - and $^{13}\text{C}$ NMR spectra for compounds

4a

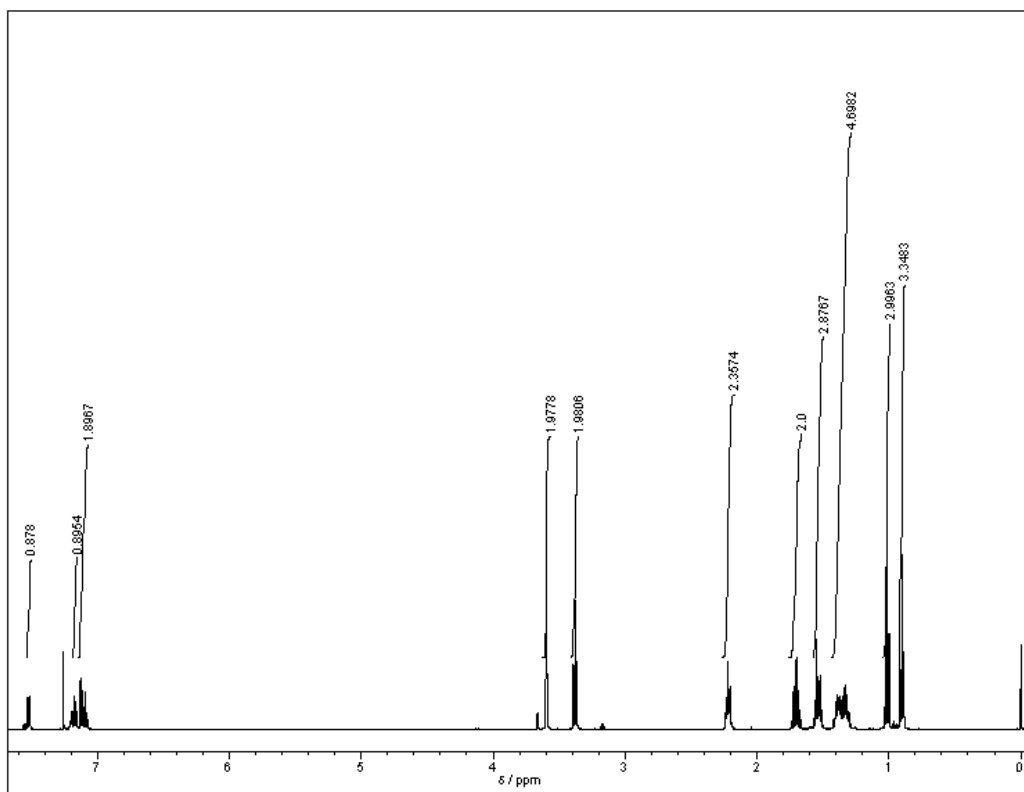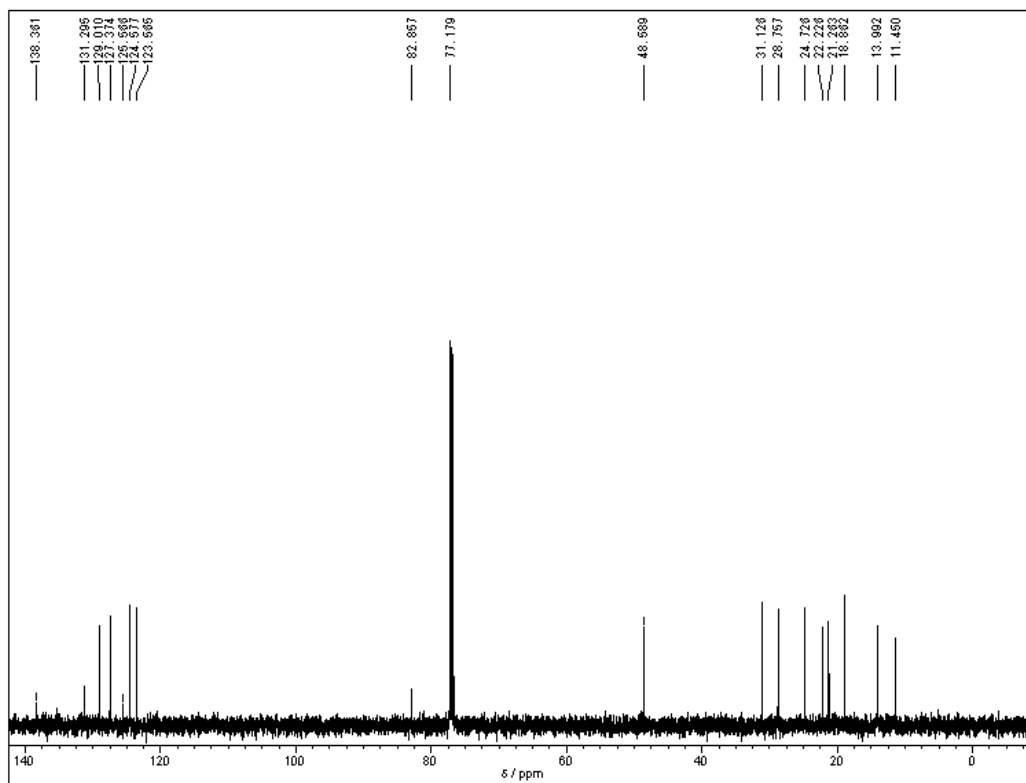

4b

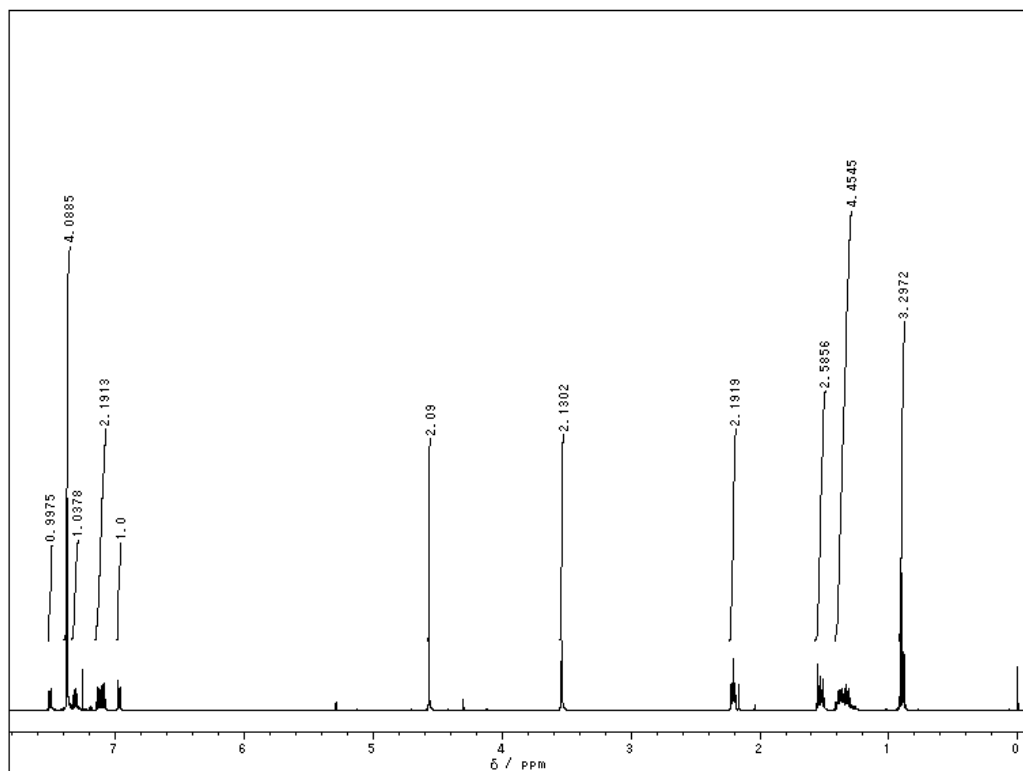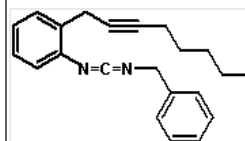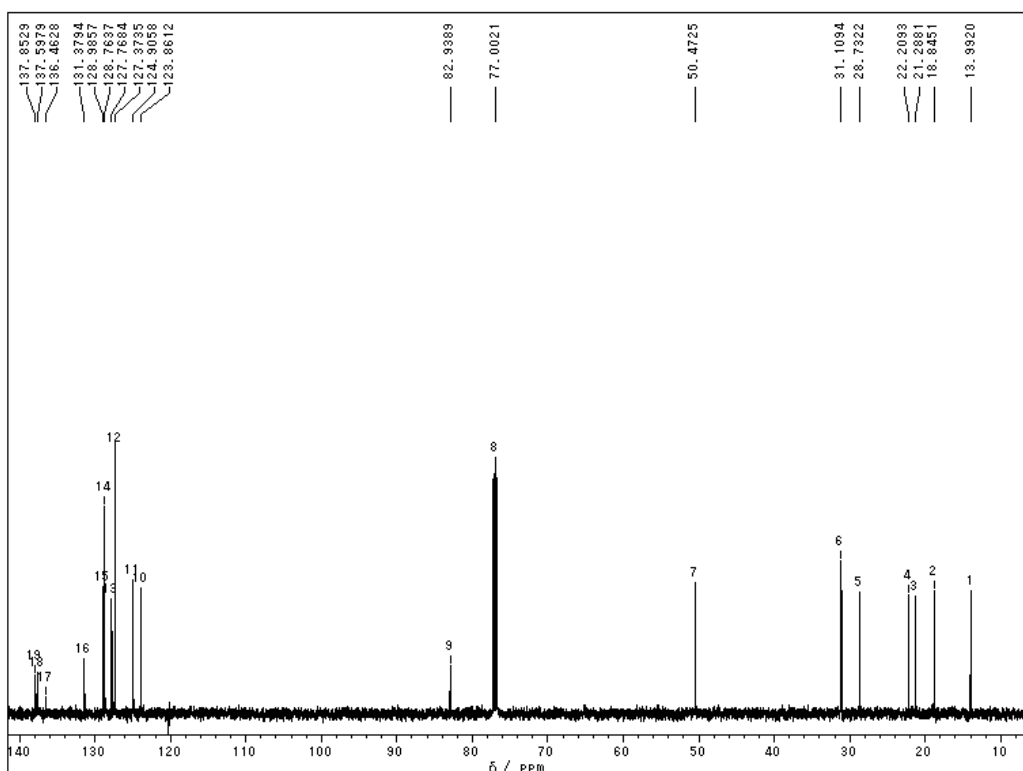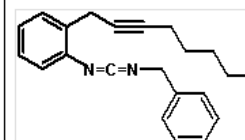

4c

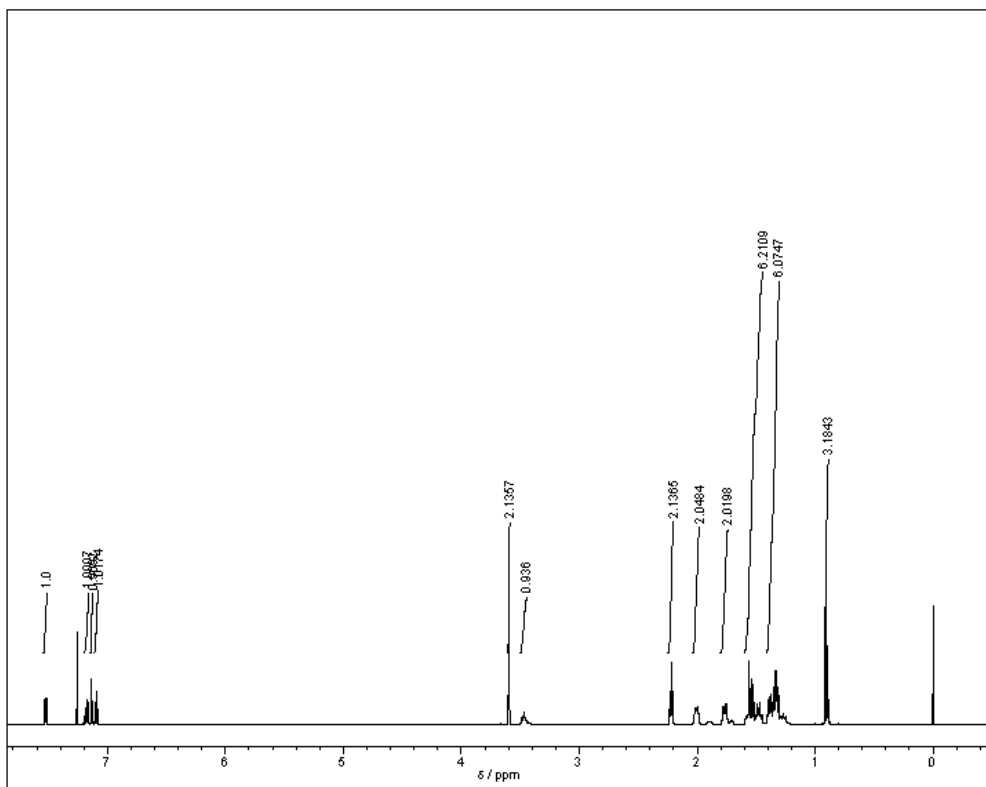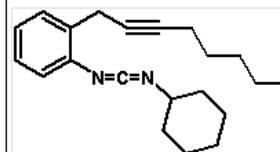

ObsNuc <sup>1</sup>H  
ObsFreq 600.13 MHz  
Solvent CDCl<sub>3</sub>

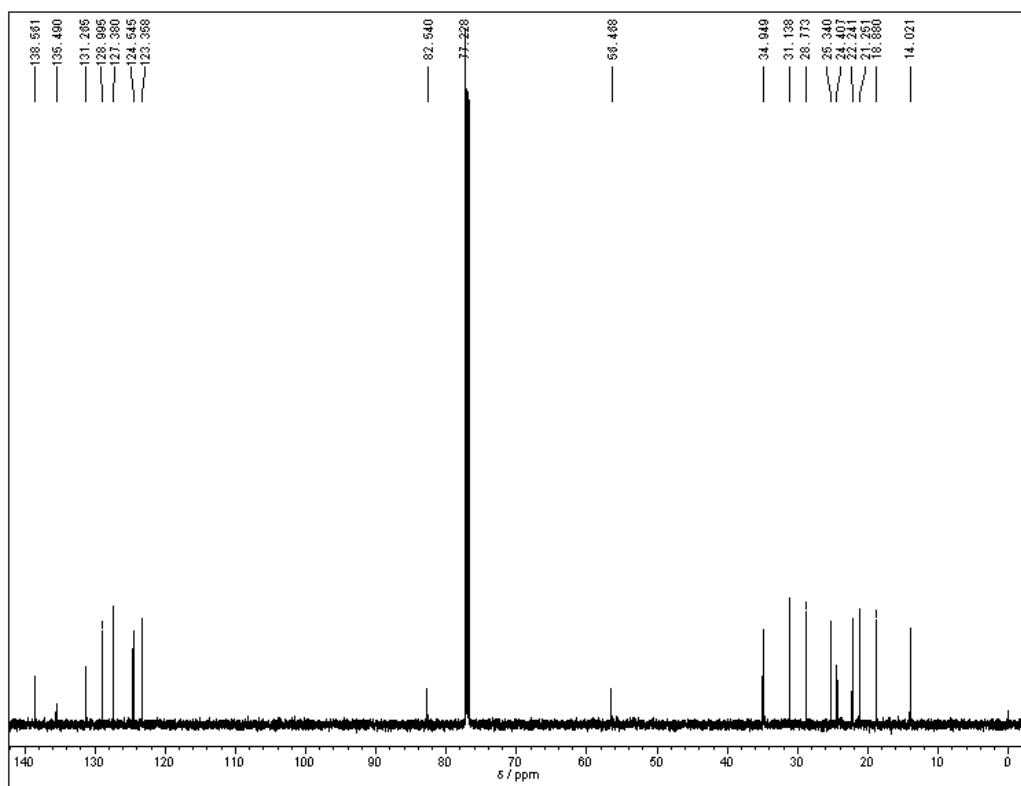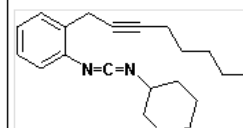

ObsNuc <sup>13</sup>C  
ObsFreq 150.9 MHz  
Solvent CDCl<sub>3</sub>

4d

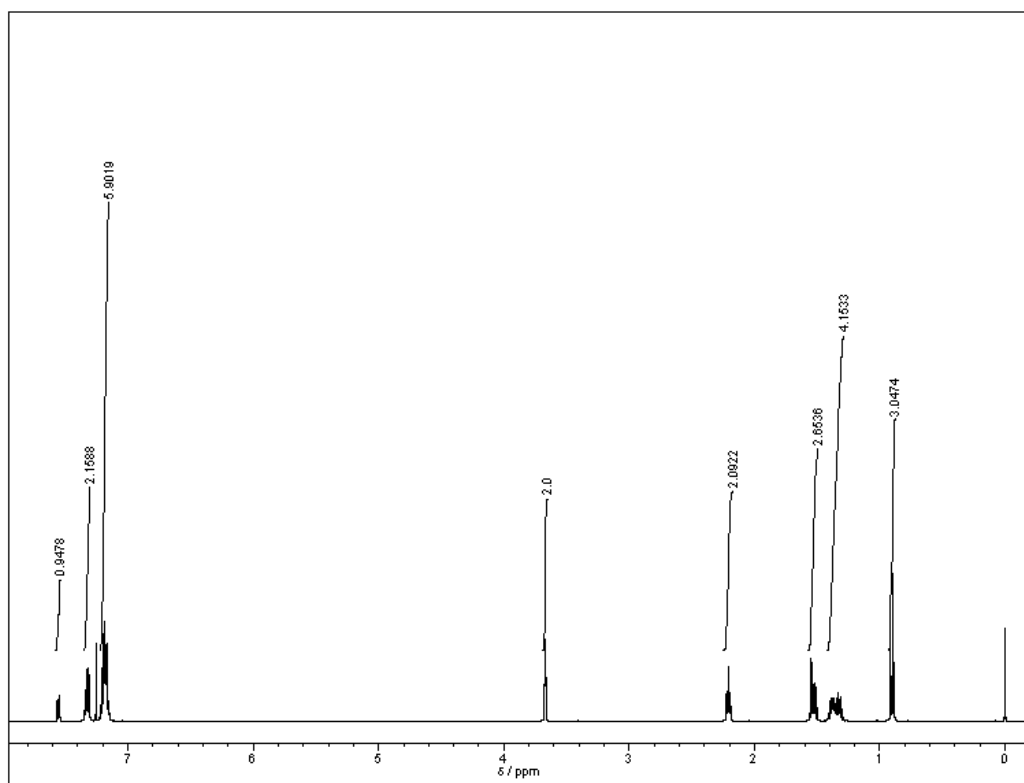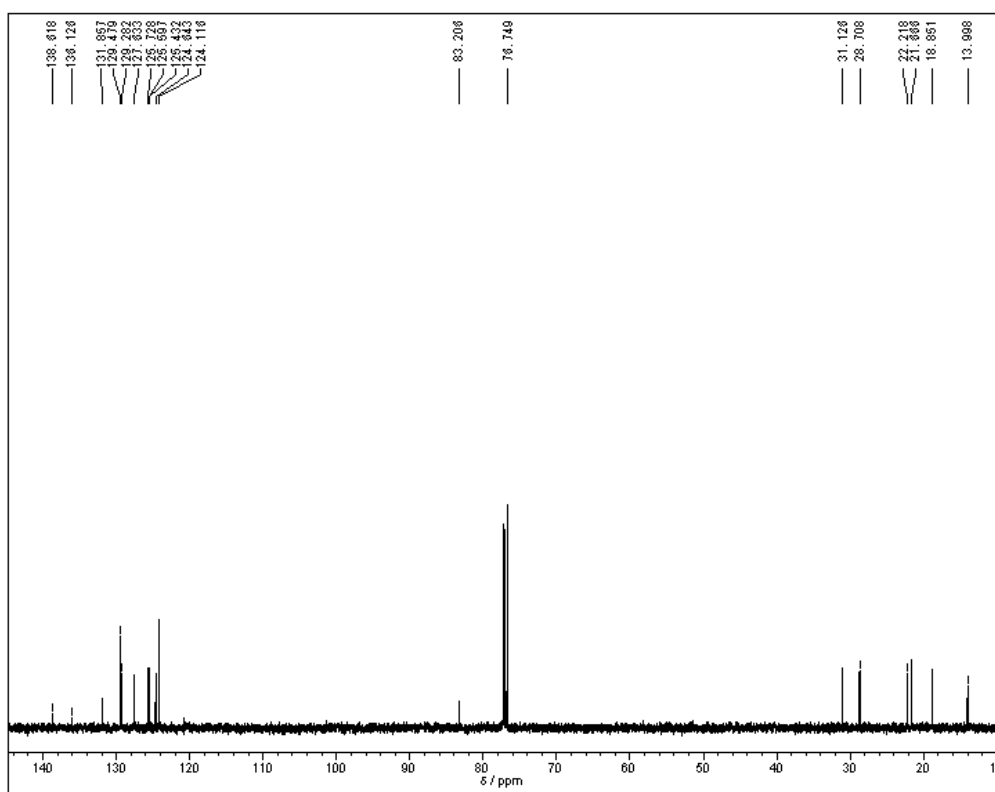

4e

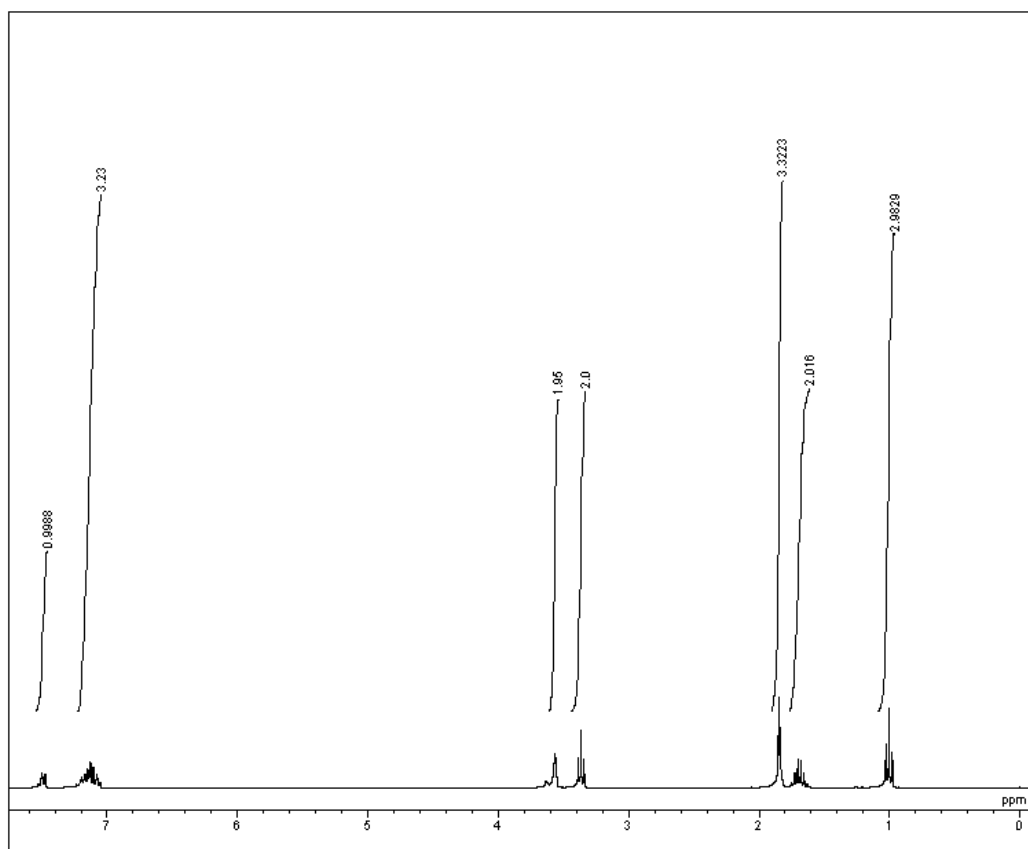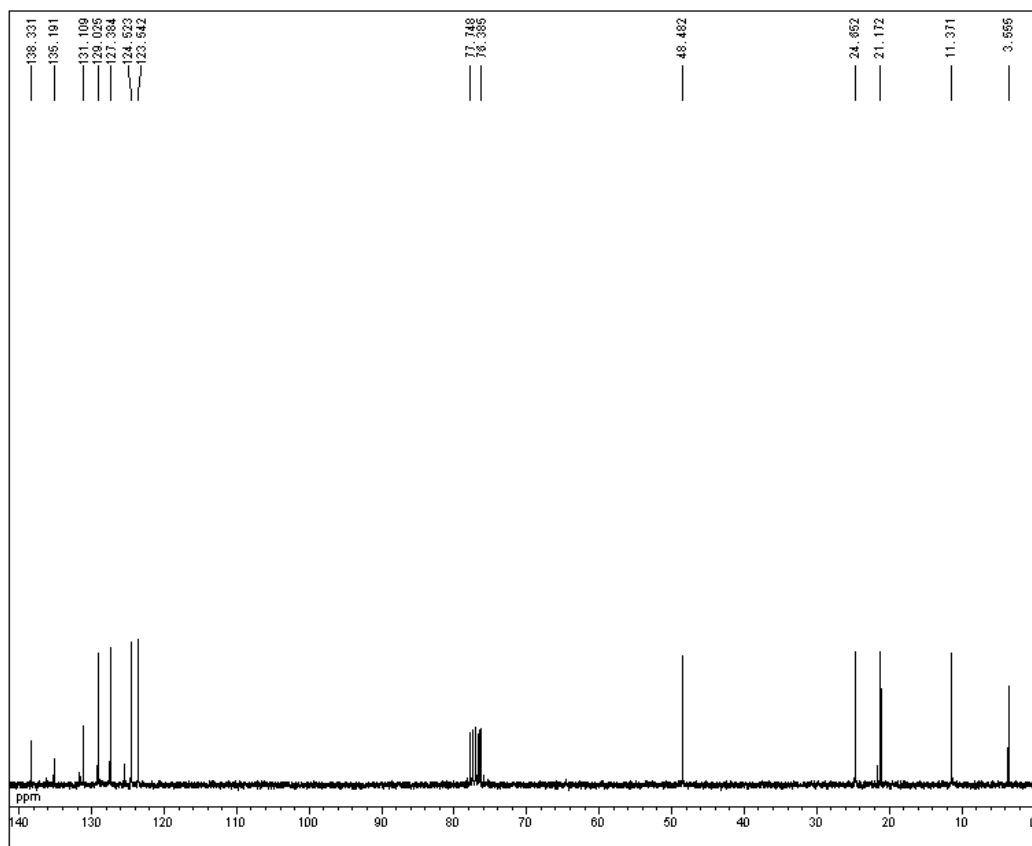

4f

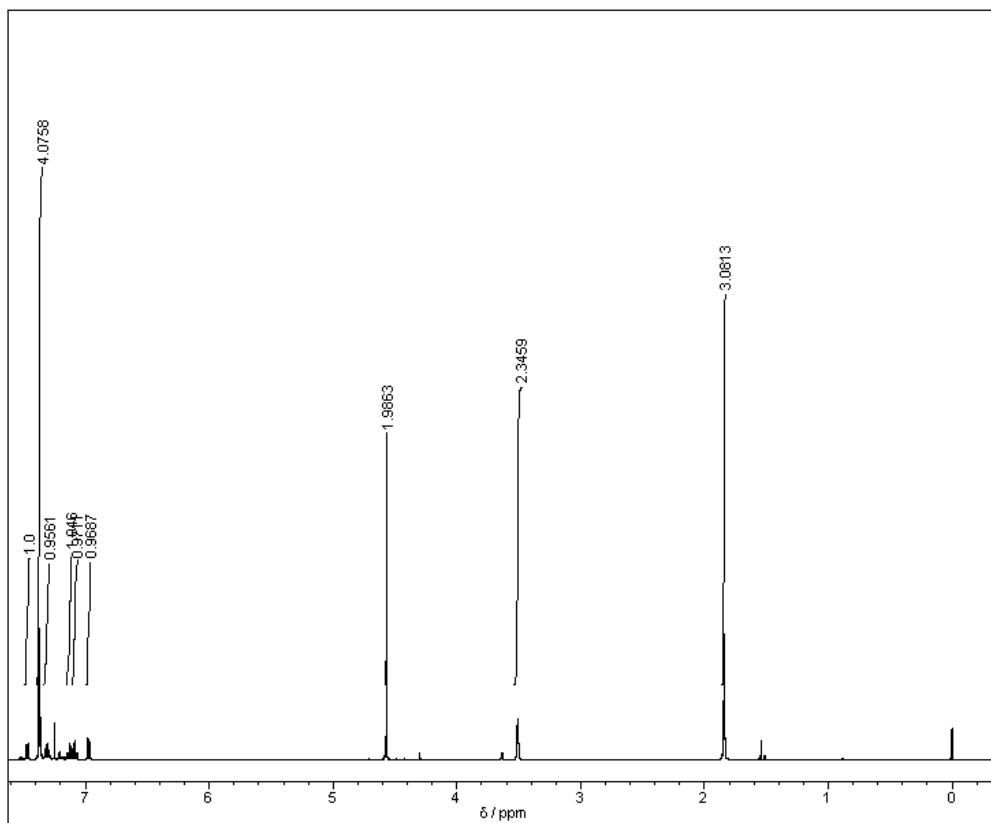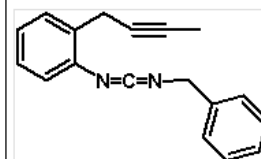

ObsNuc 1H  
ObsFreq 500.0 MHz  
Solvent CDCl<sub>3</sub>

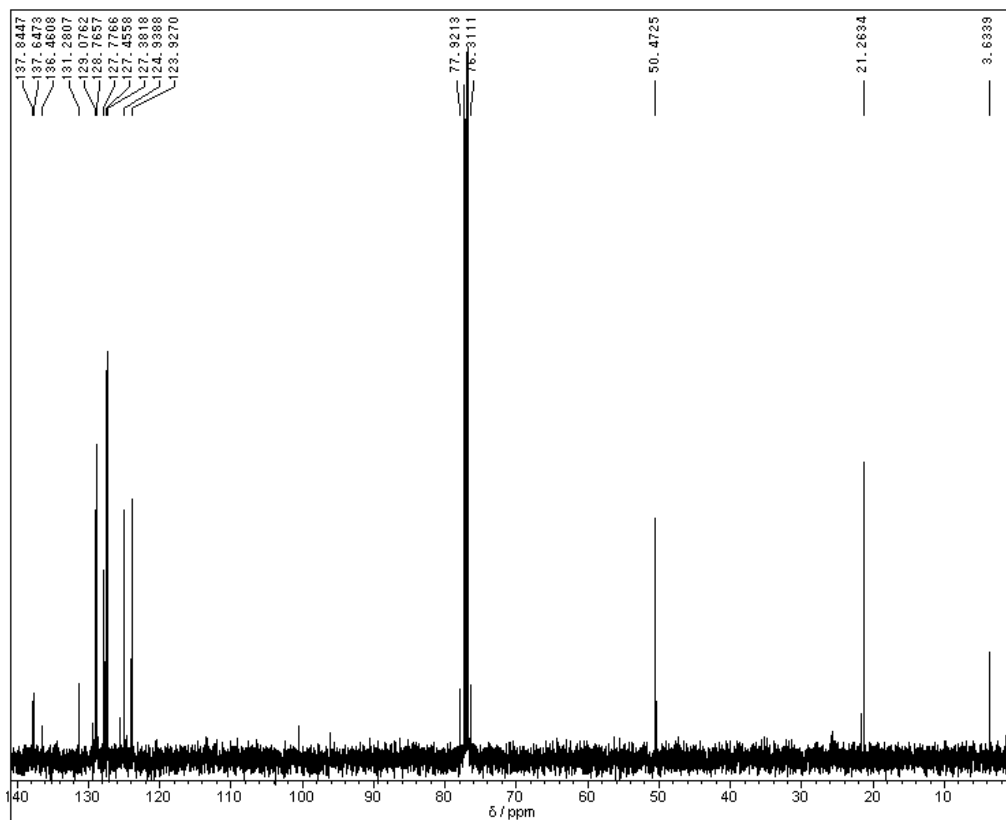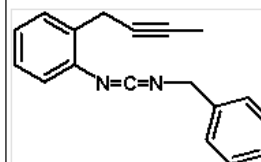

ObsNuc 13C  
ObsFreq 125.65 MHz  
Solvent CDCl<sub>3</sub>

4g

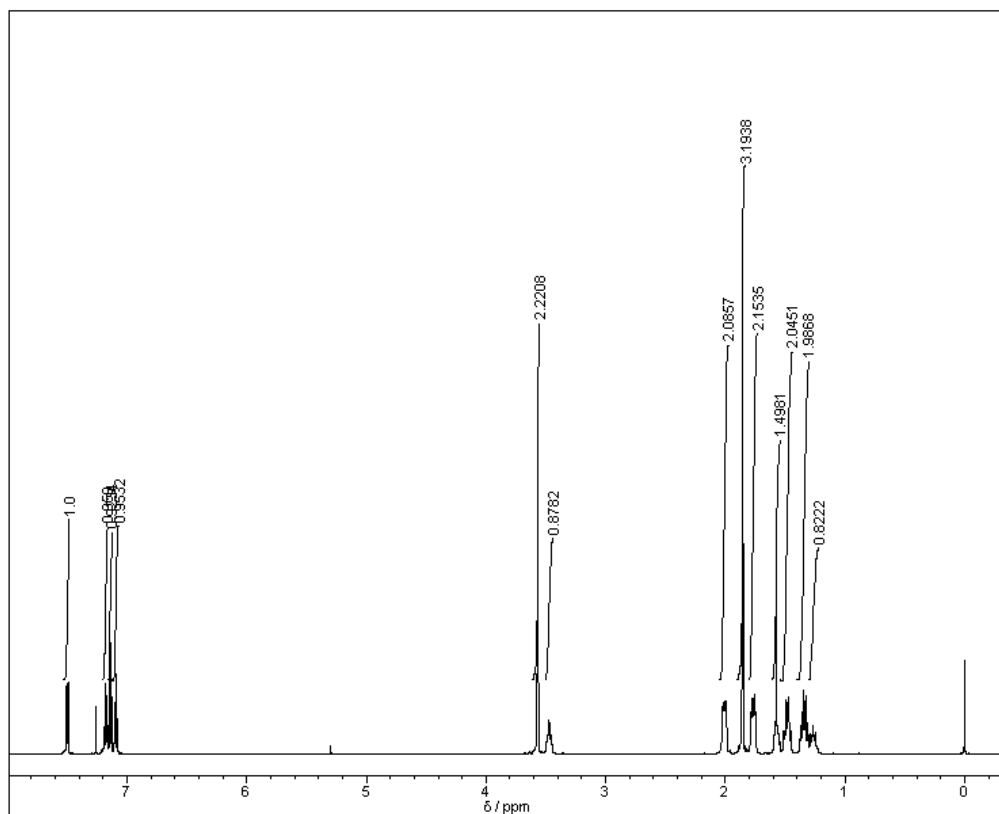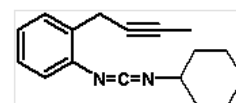

ObsNuc <sup>1</sup>H  
ObsFreq 600.13 MHz  
Solvent CDCl<sub>3</sub>

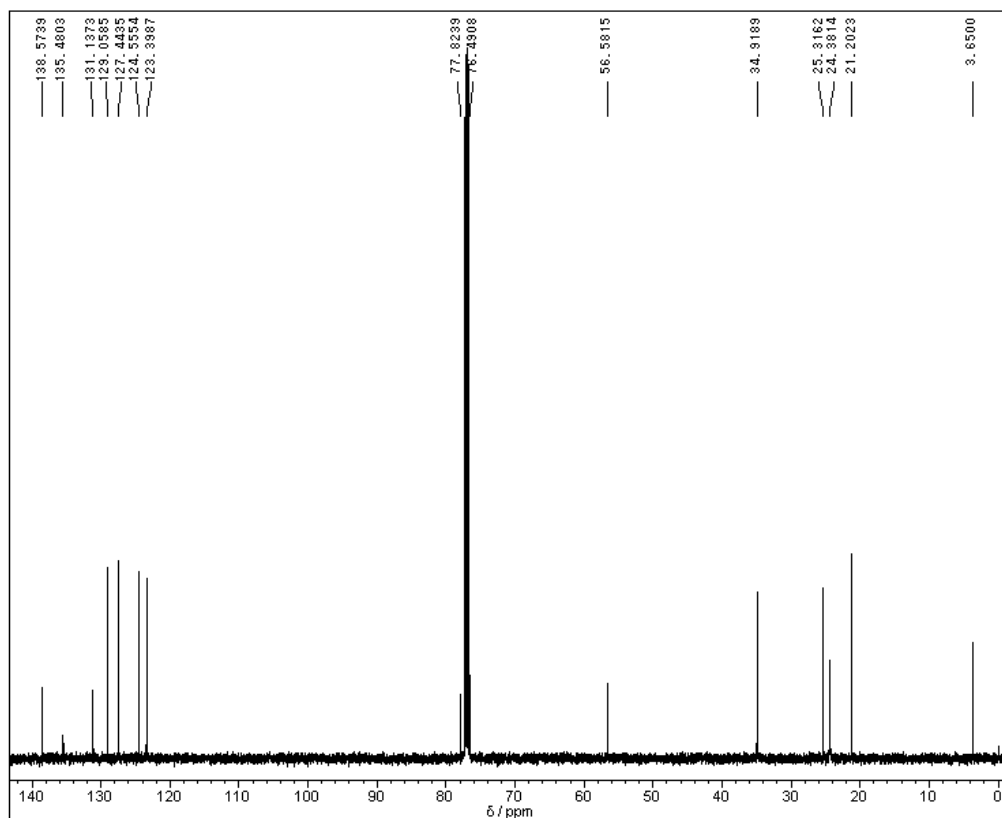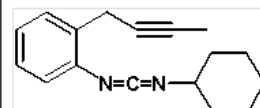

ObsNuc <sup>13</sup>C  
ObsFreq 150.9 MHz  
Solvent CDCl<sub>3</sub>

4h

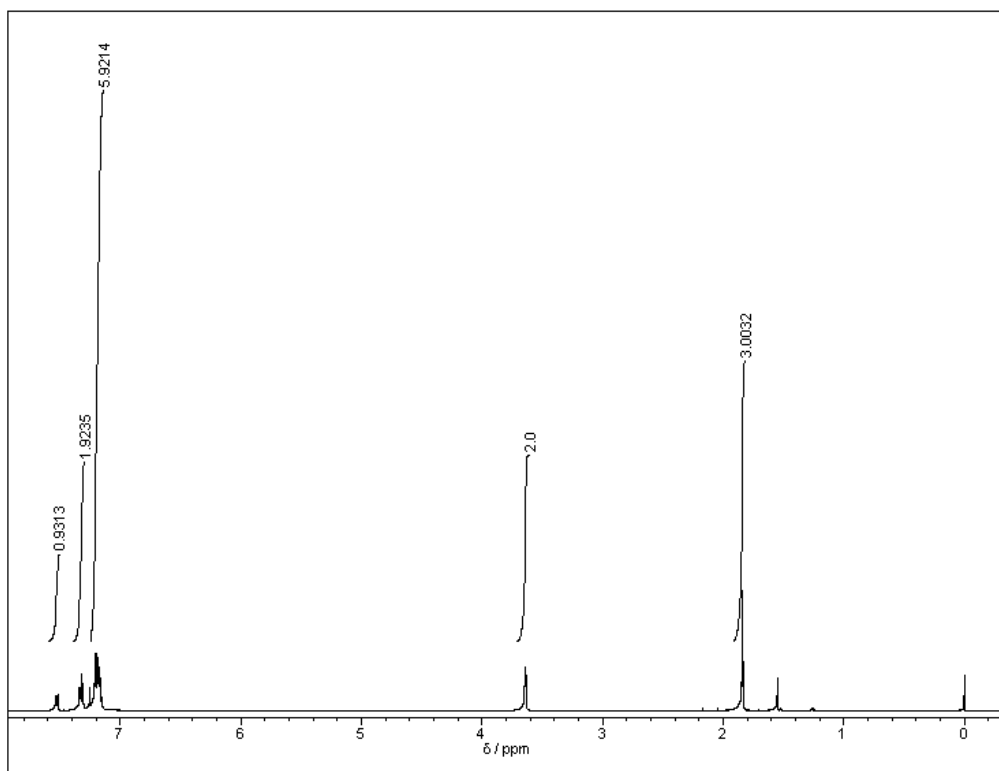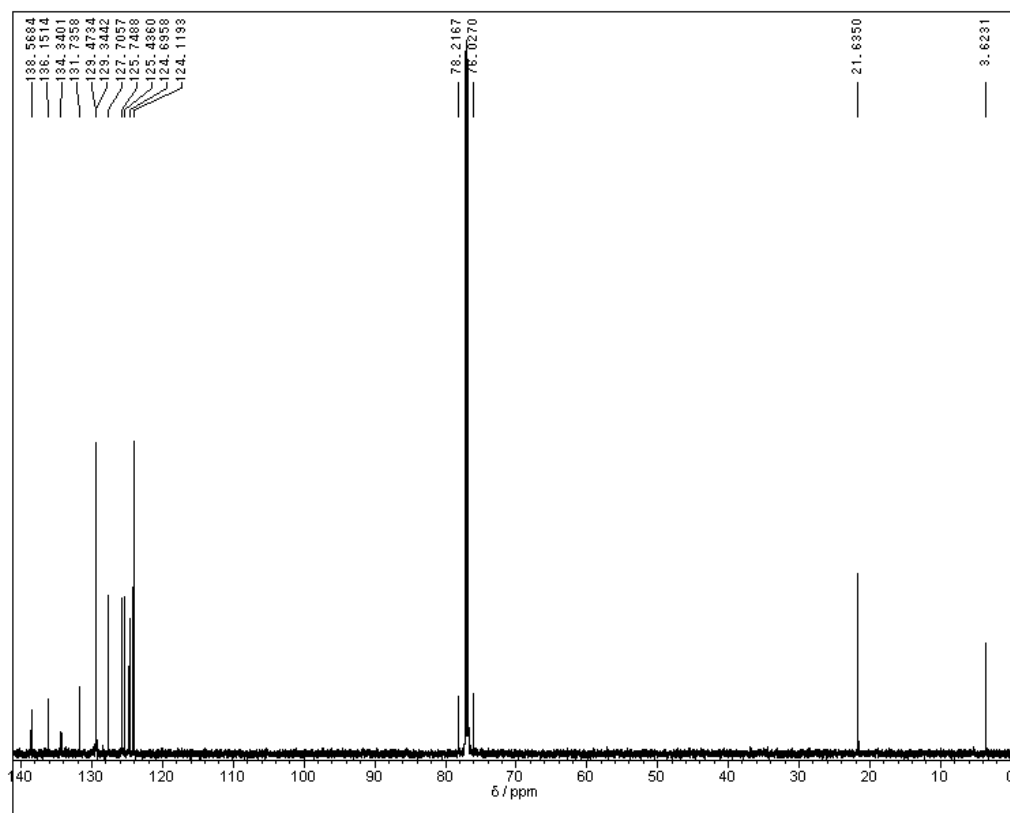



4i

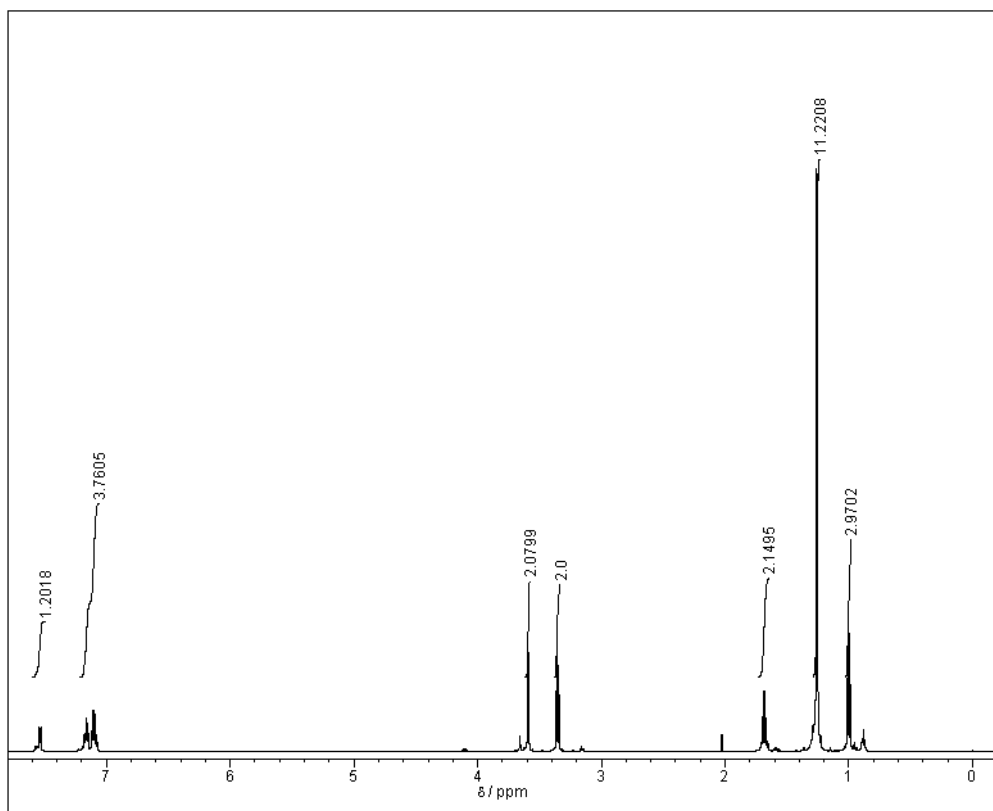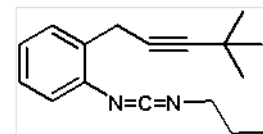

ObsNuc <sup>1</sup>H  
ObsFreq 600.13 MHz  
Solvent CDCl<sub>3</sub>

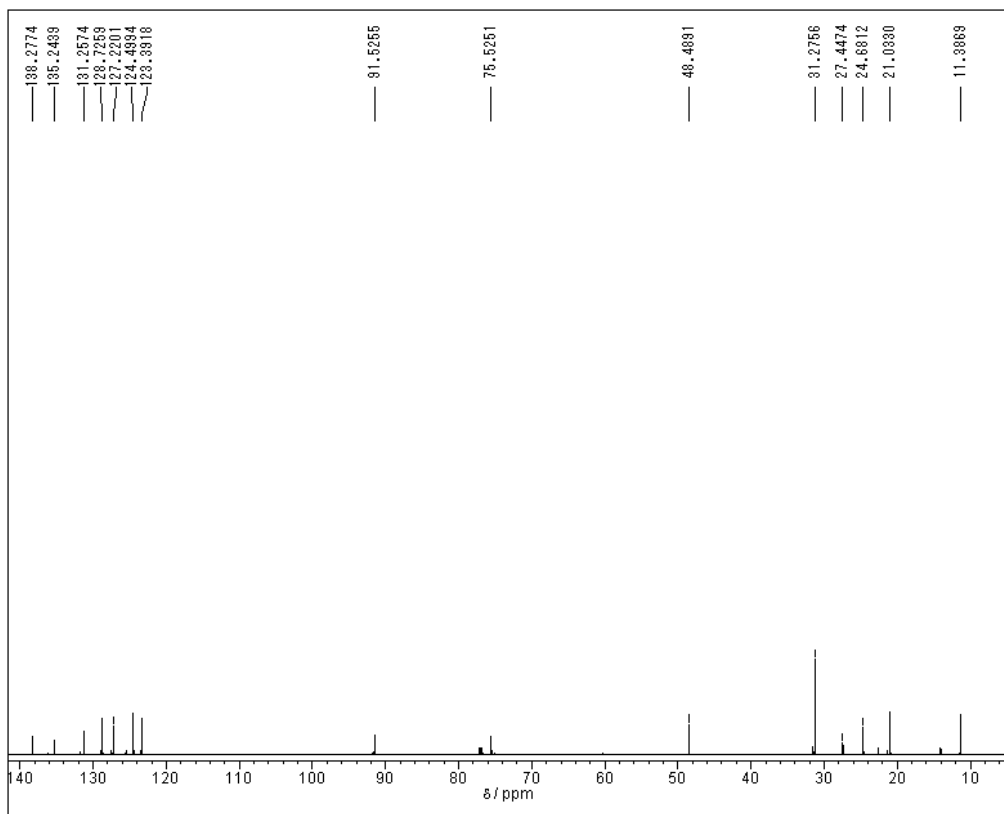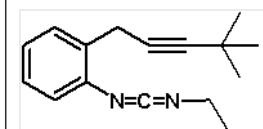

ObsNuc <sup>13</sup>C  
ObsFreq 150.9 MHz  
Solvent CDCl<sub>3</sub>

4j

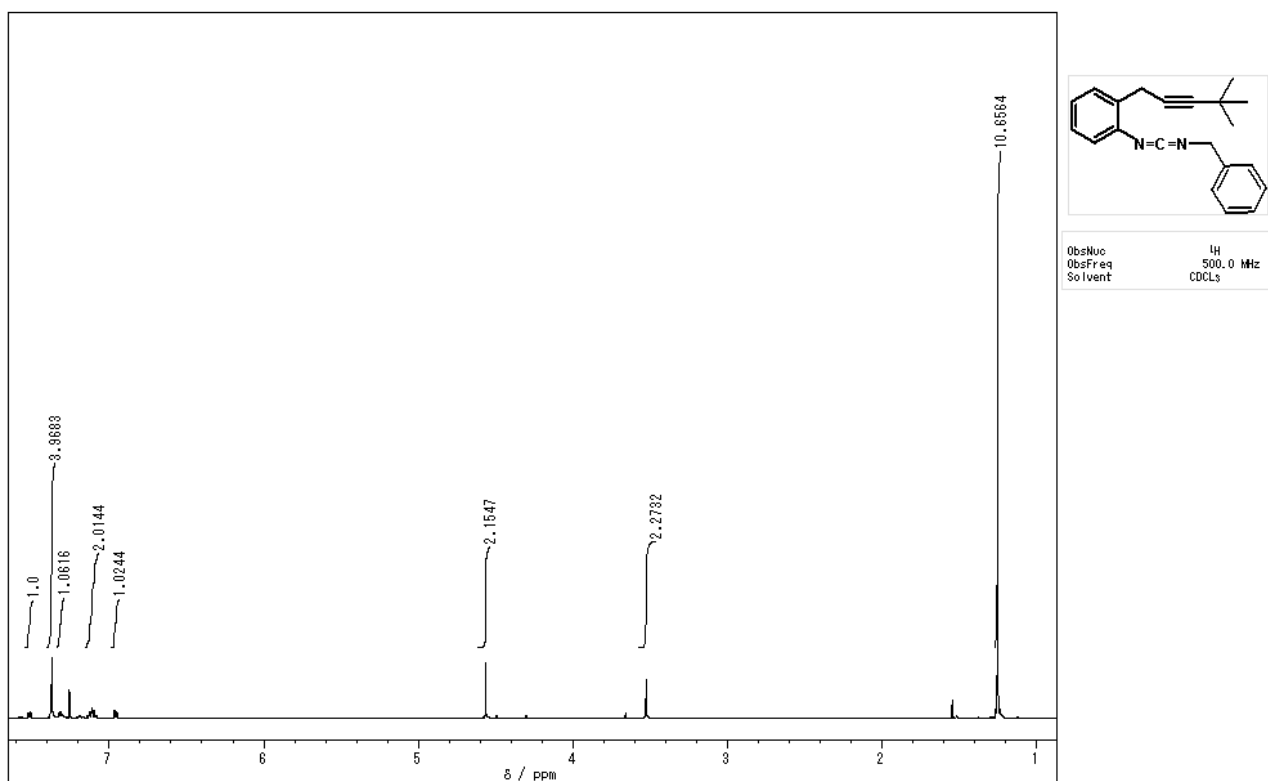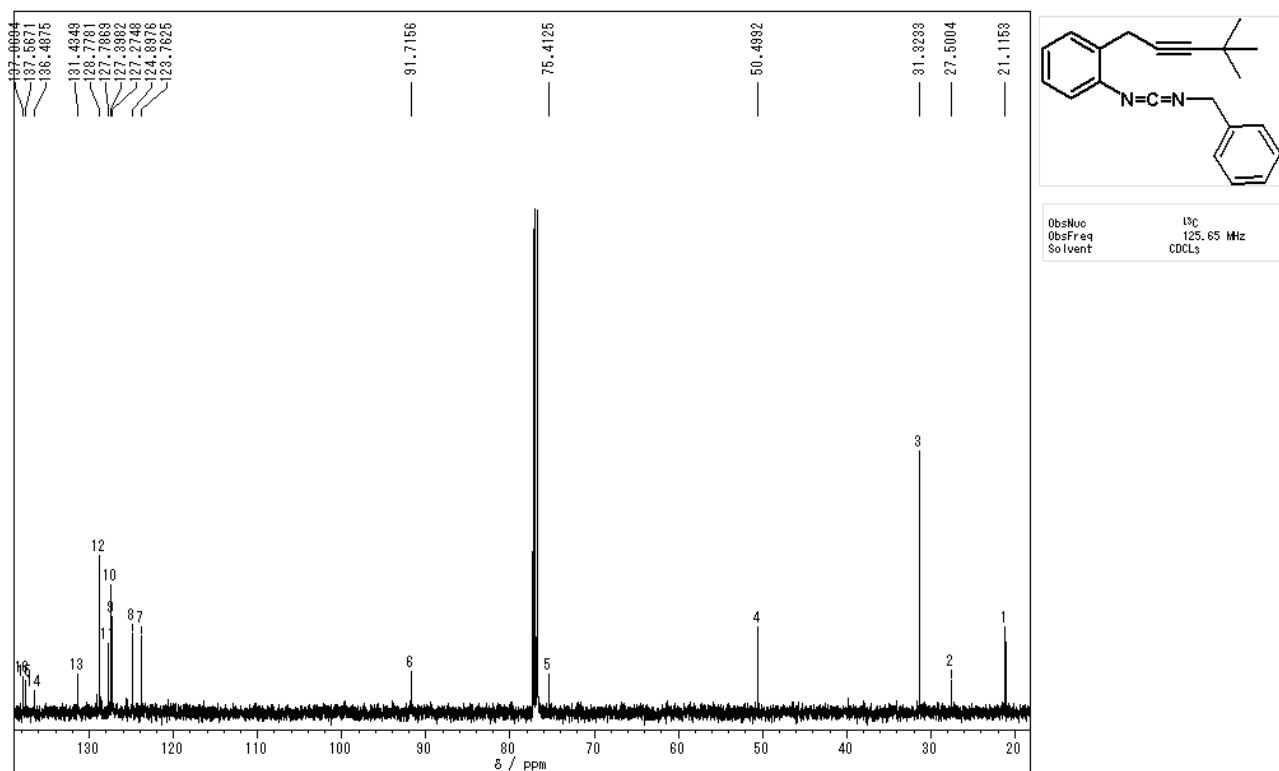

4k

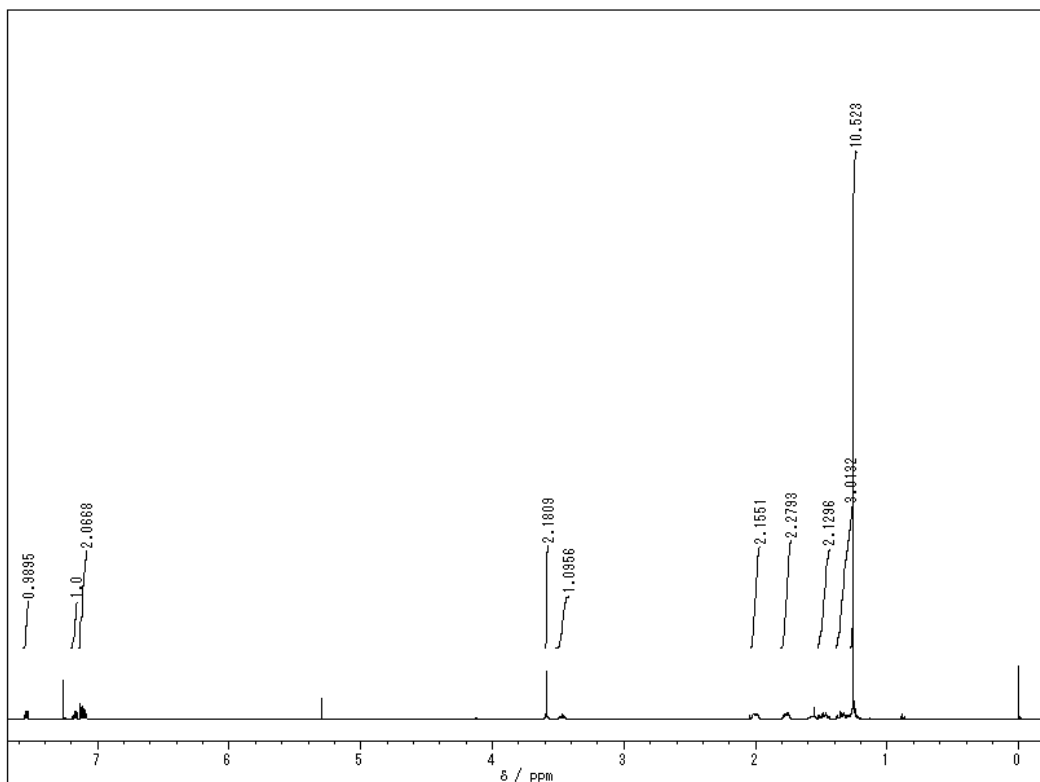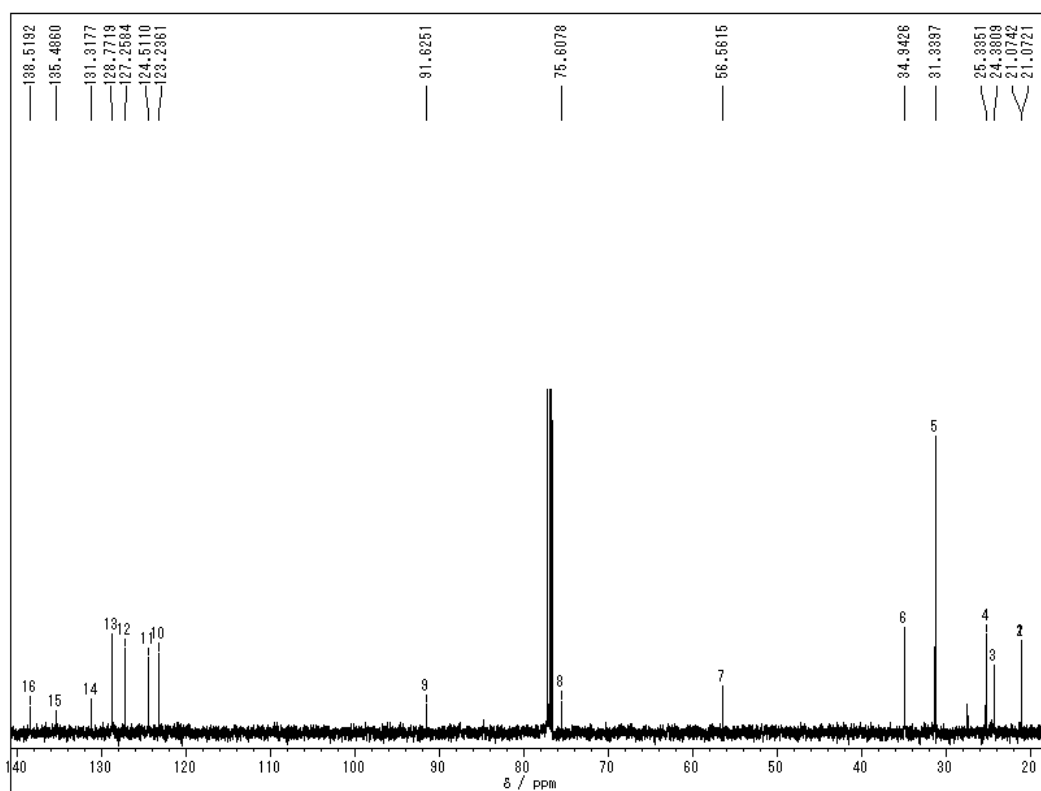

41

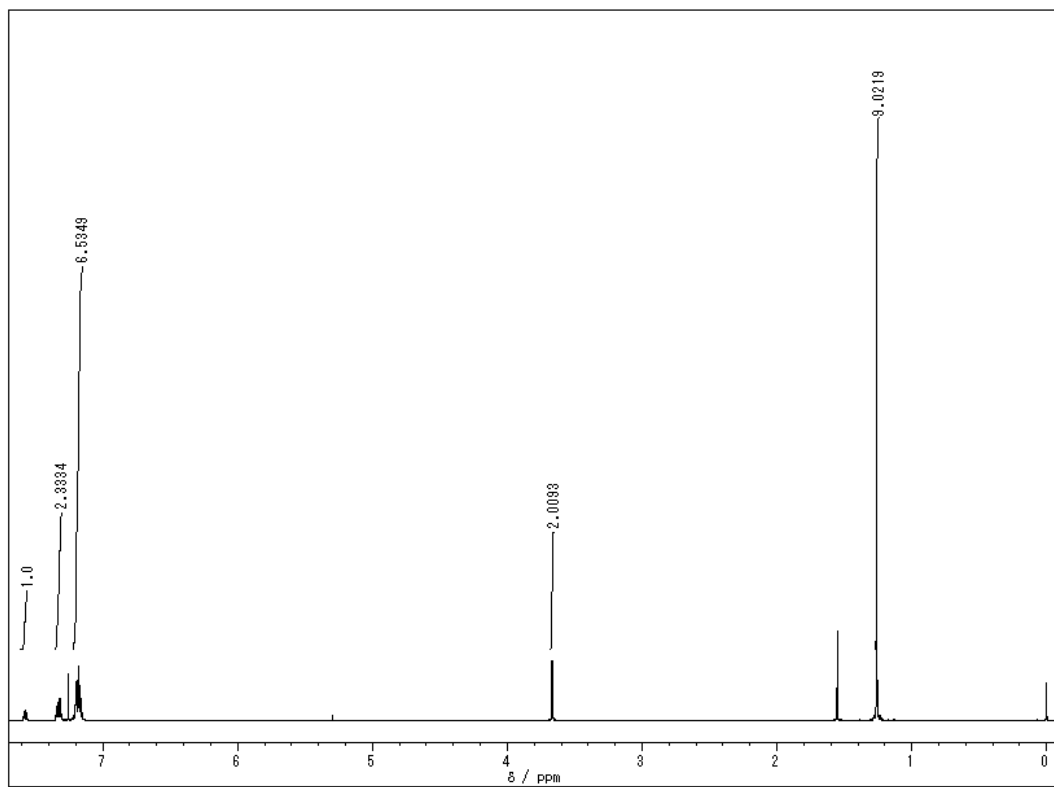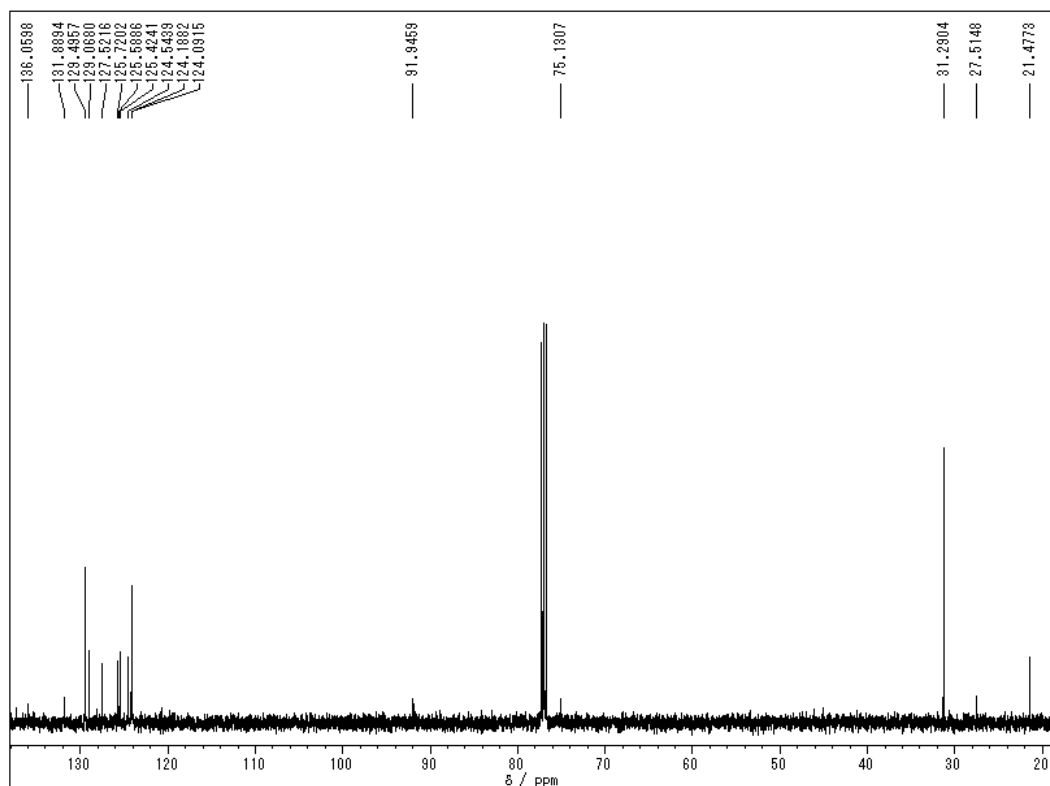

4m

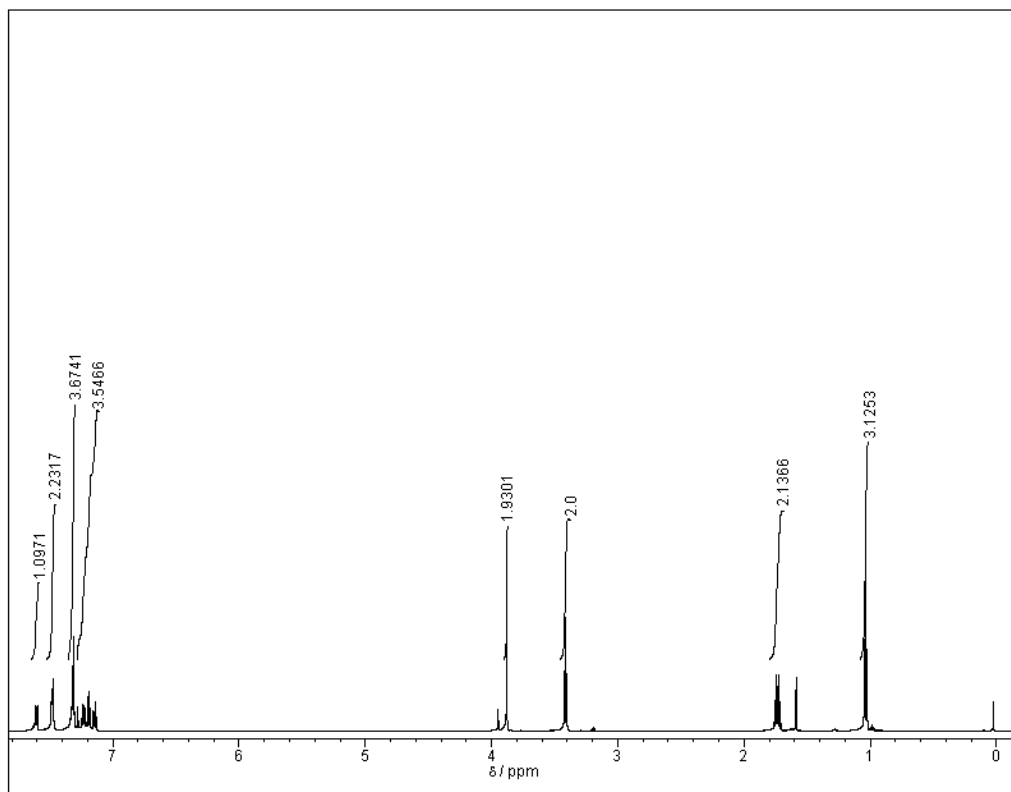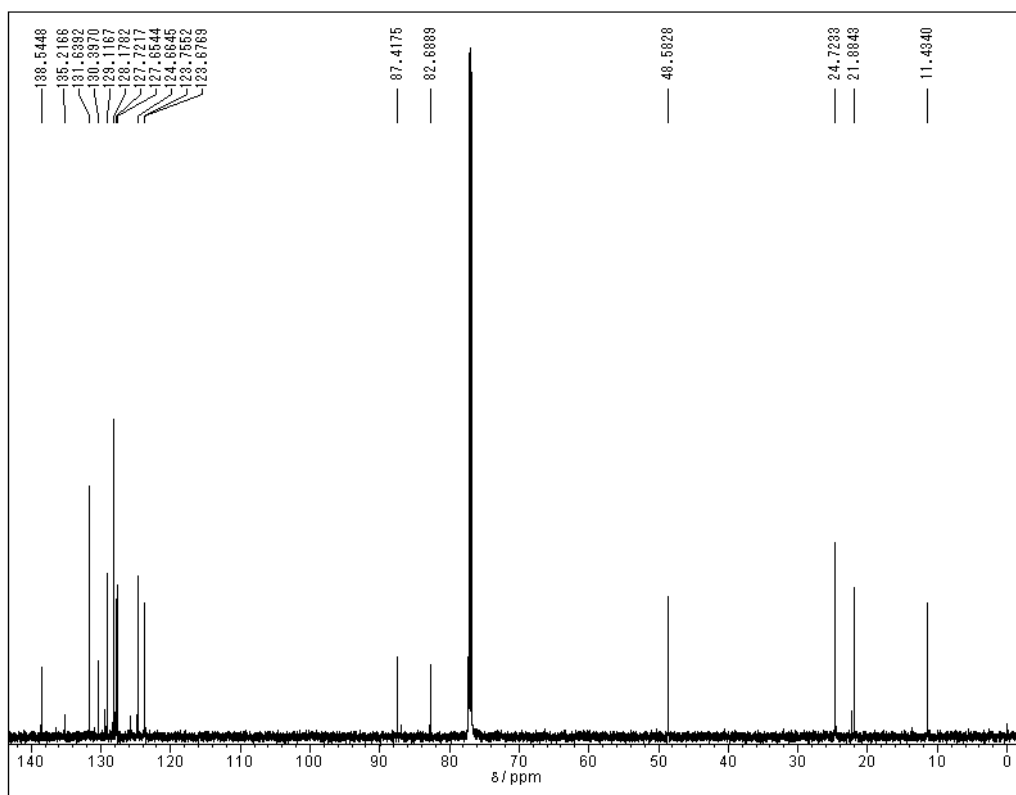

4n

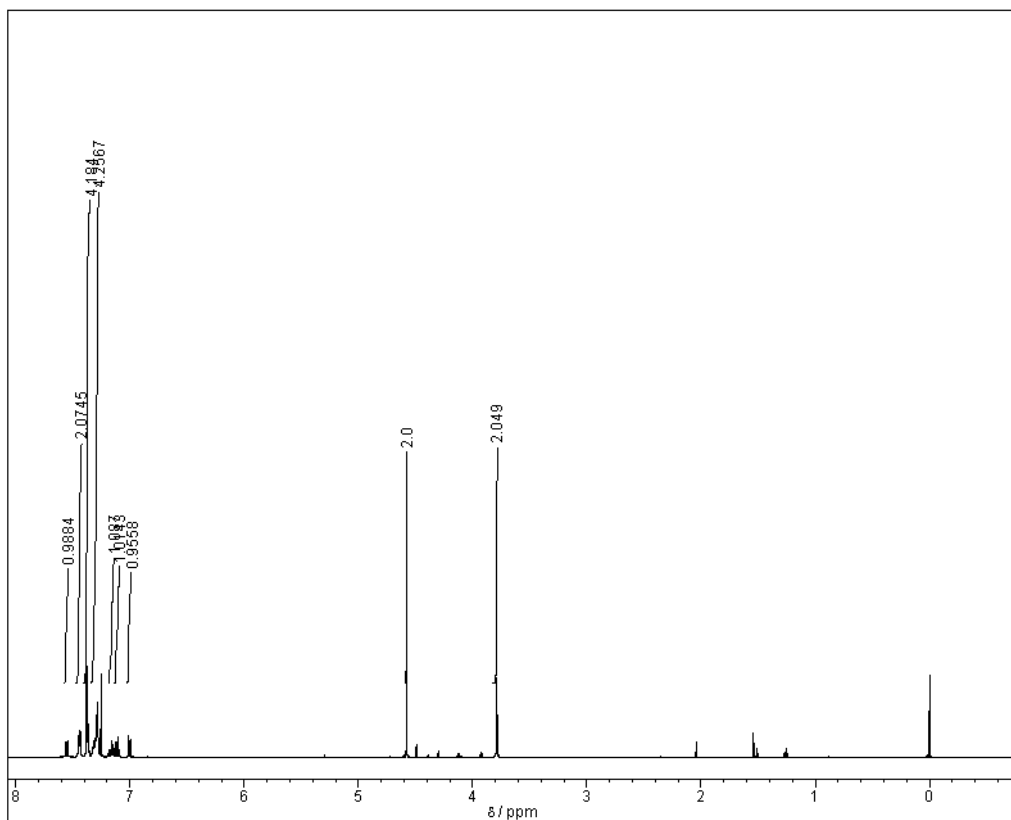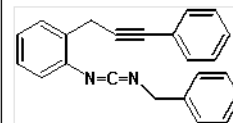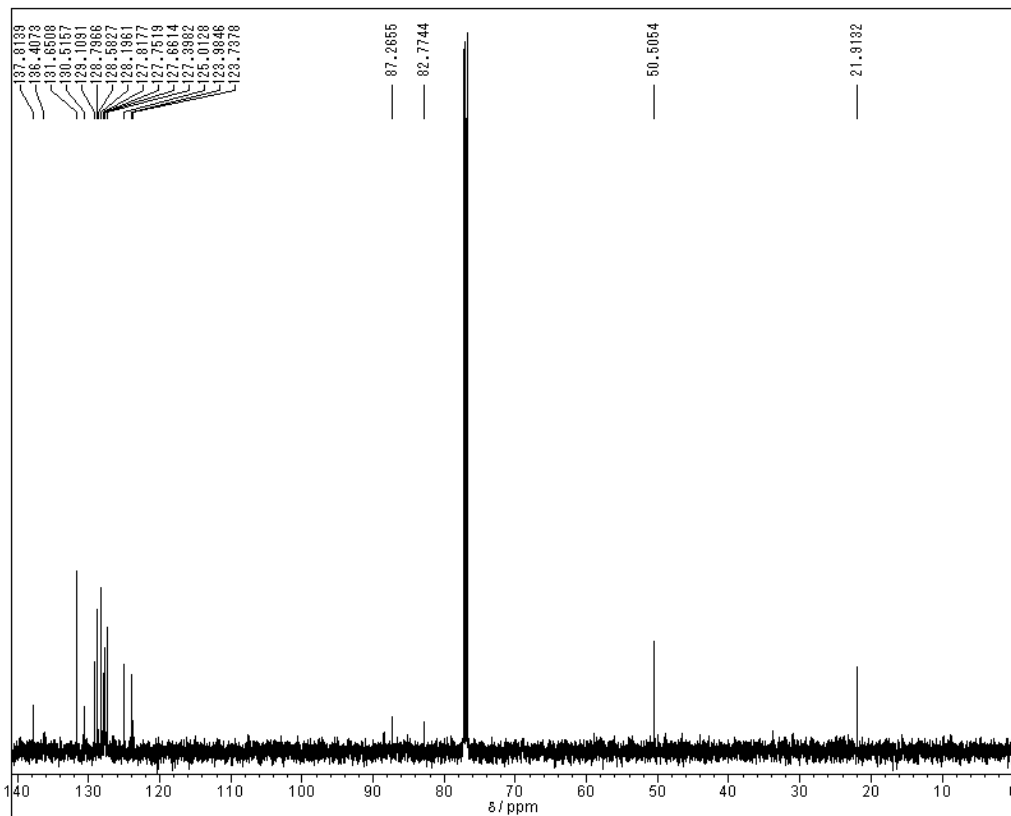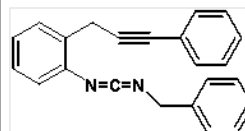

40

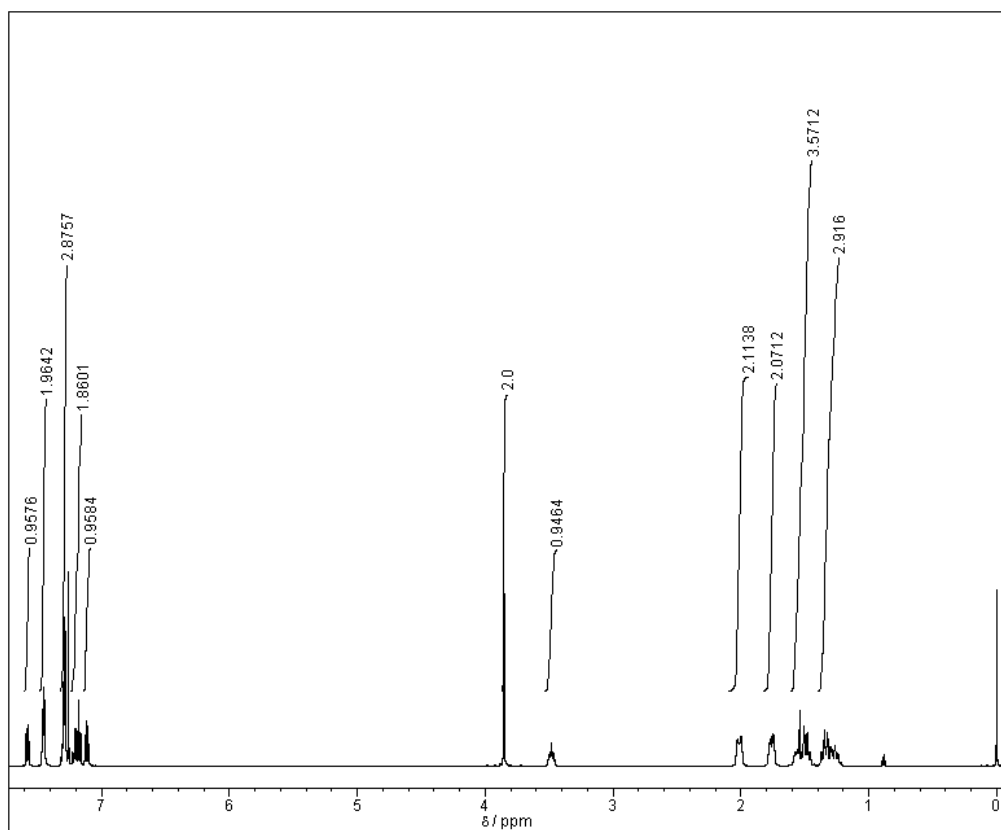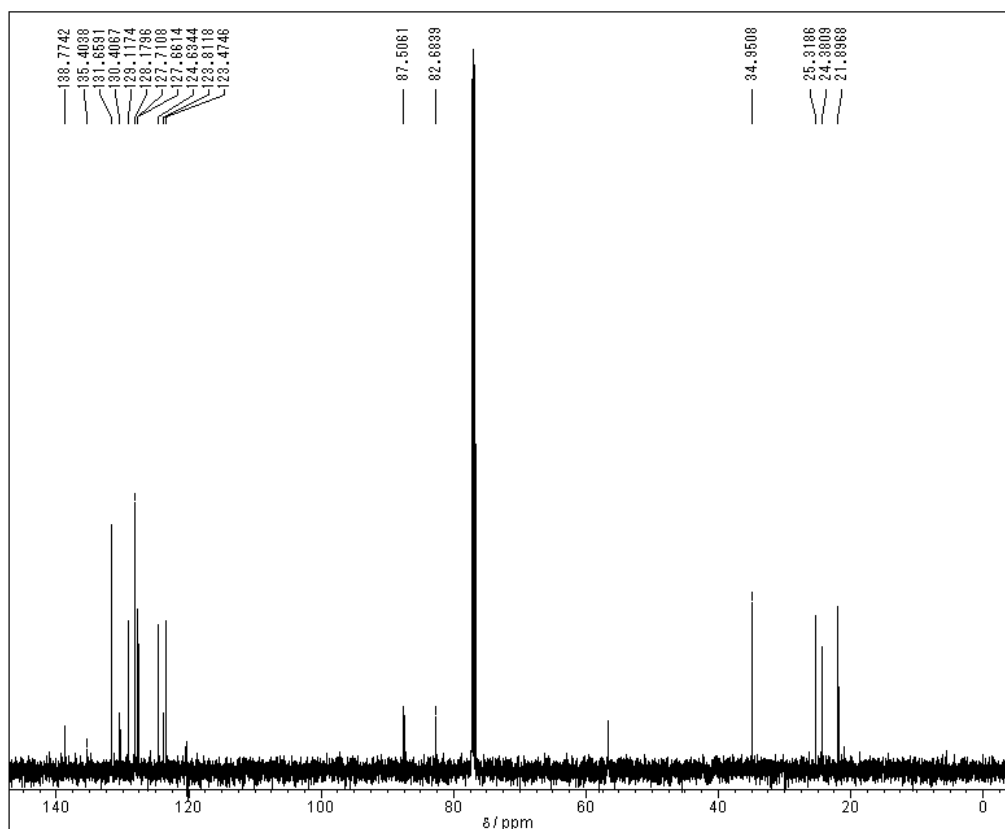

4p

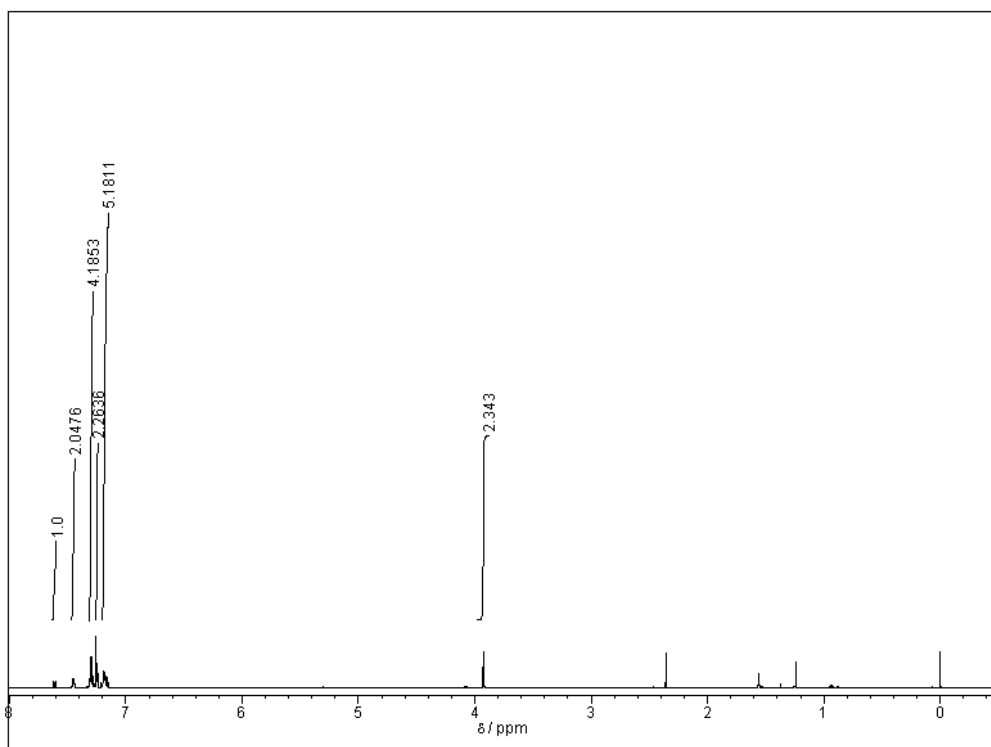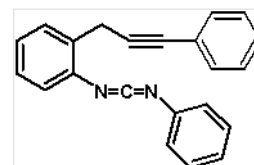

ObsNuc  $^1\text{H}$   
ObsFreq 600.13 MHz  
Solvent  $\text{CDCl}_3$

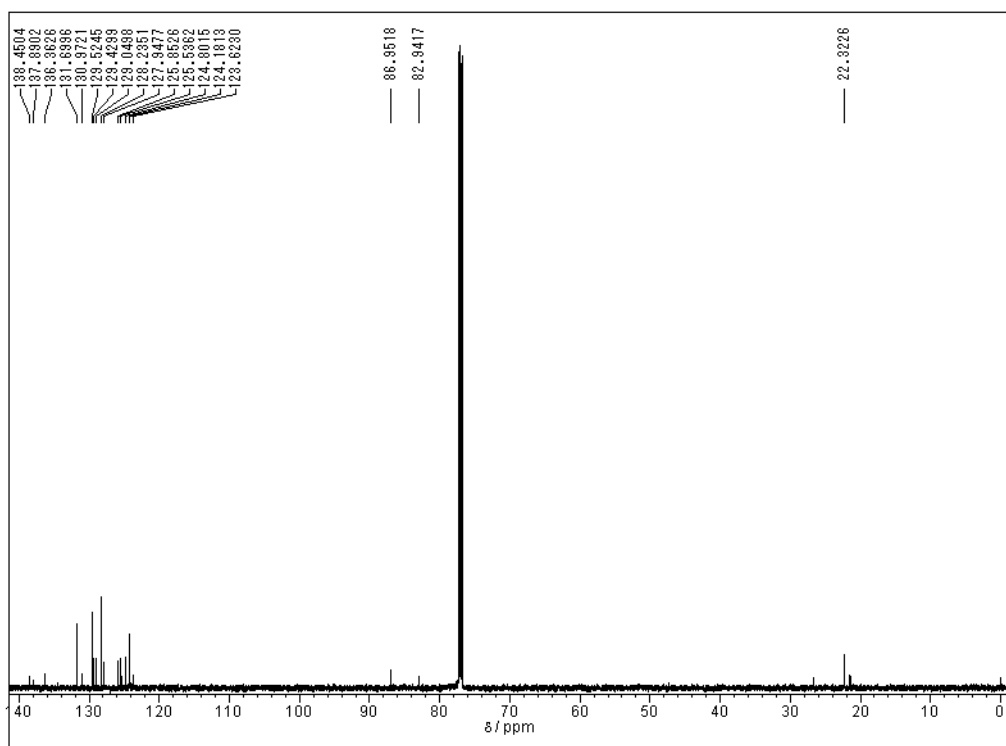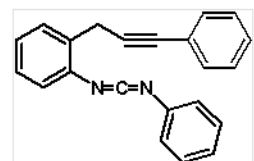

ObsNuc  $^{13}\text{C}$   
ObsFreq 150.9 MHz  
Solvent  $\text{CDCl}_3$



4q

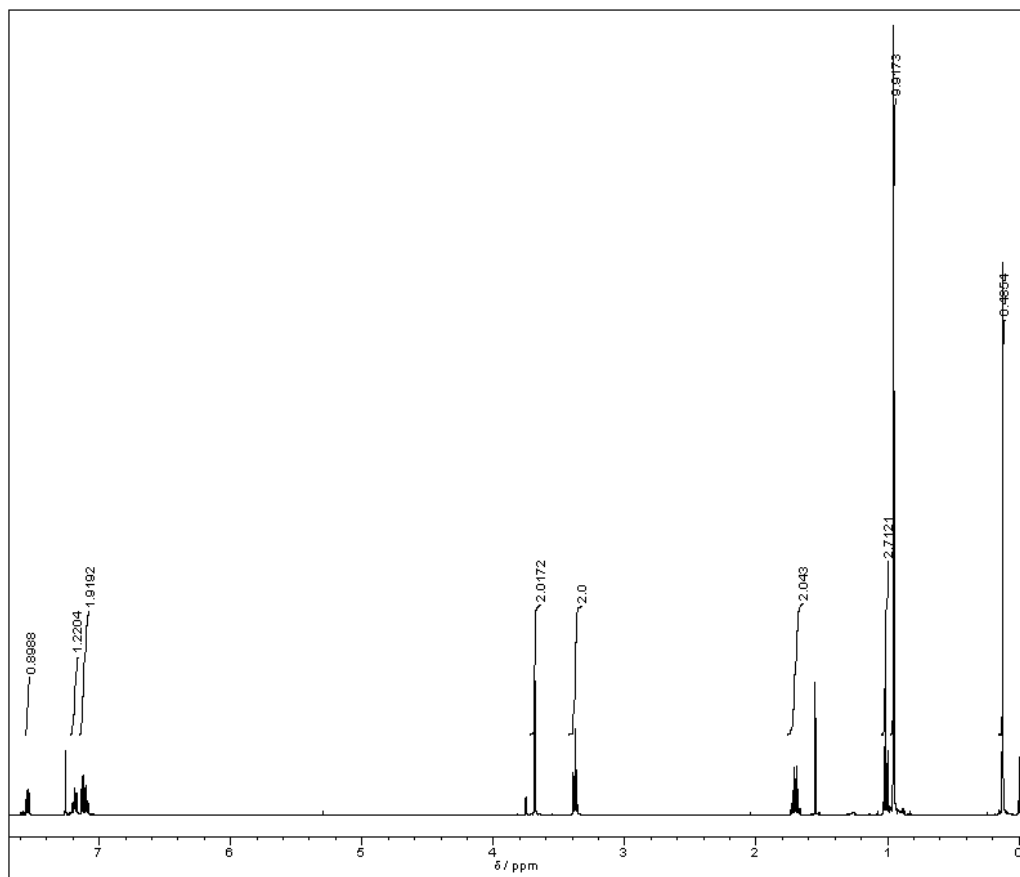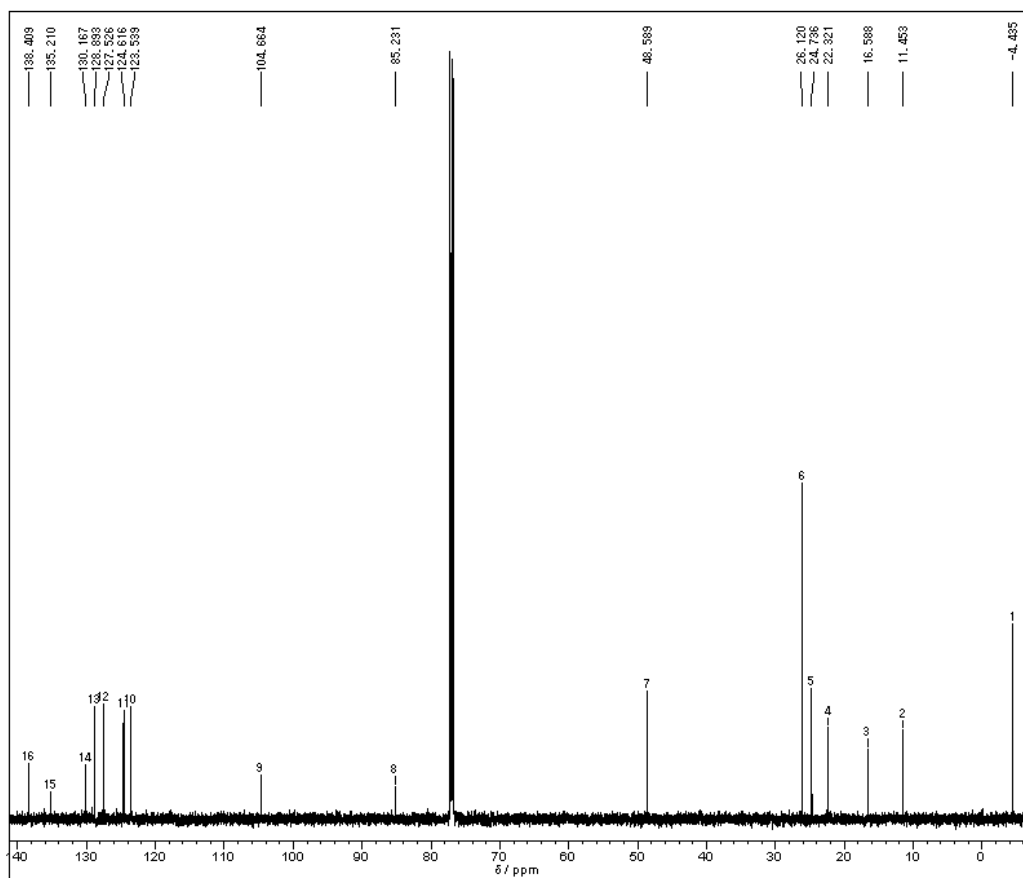

4r

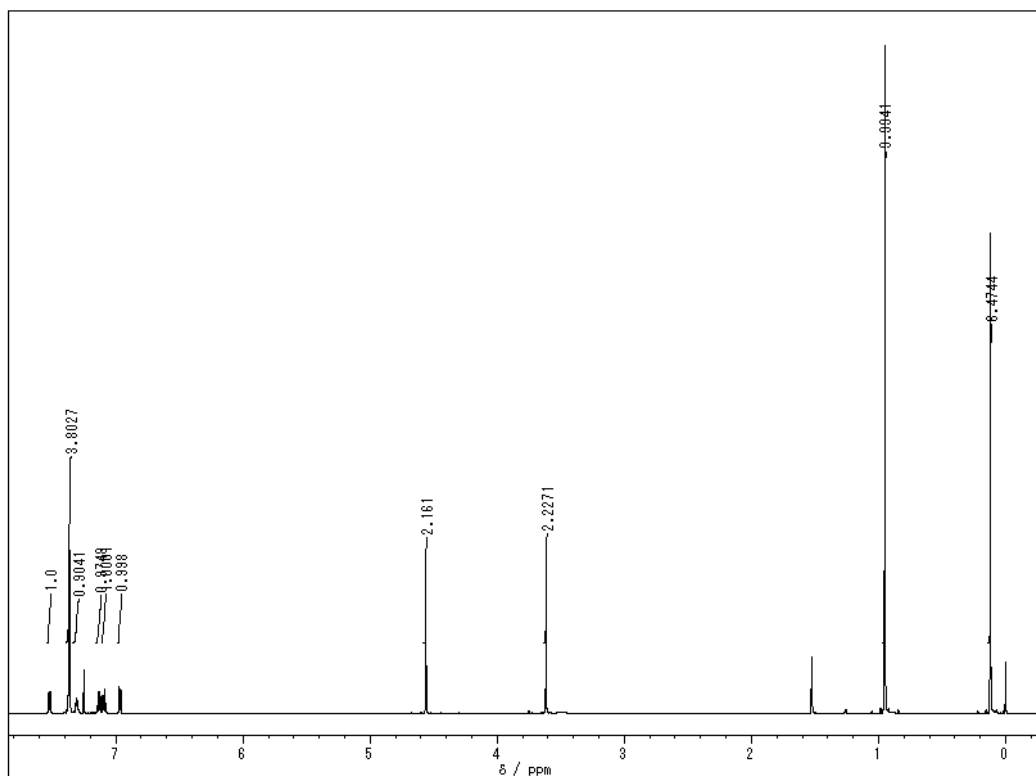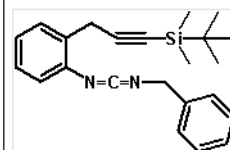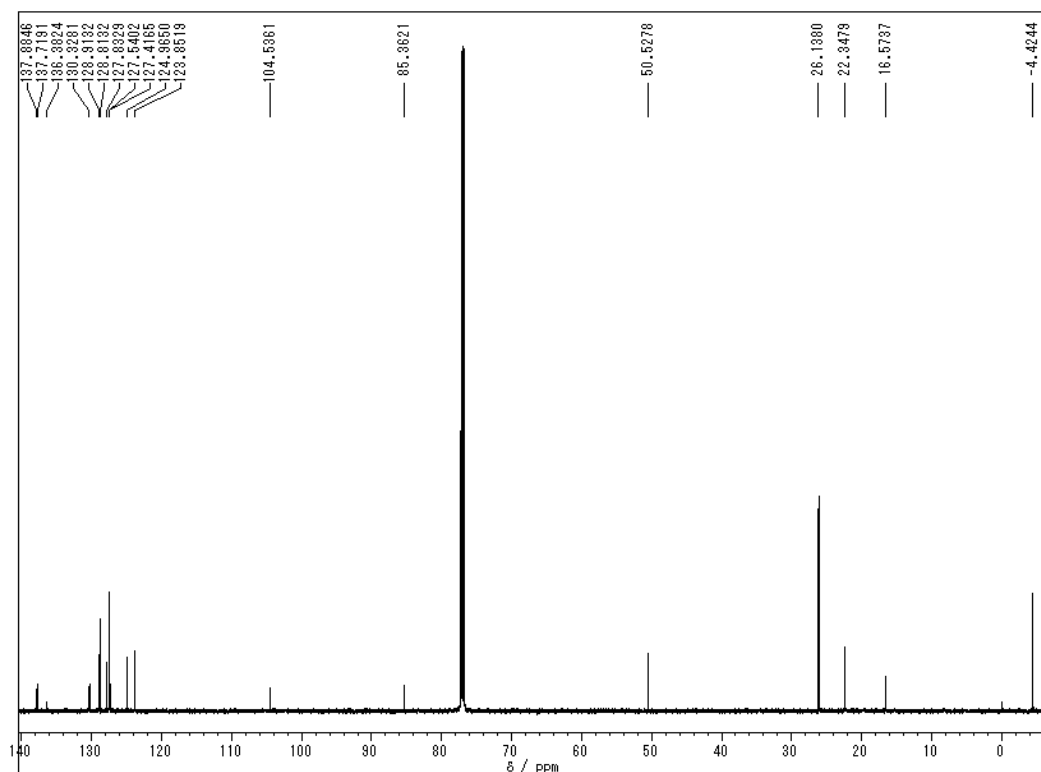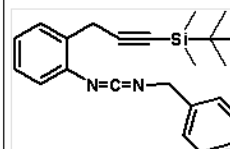

4s

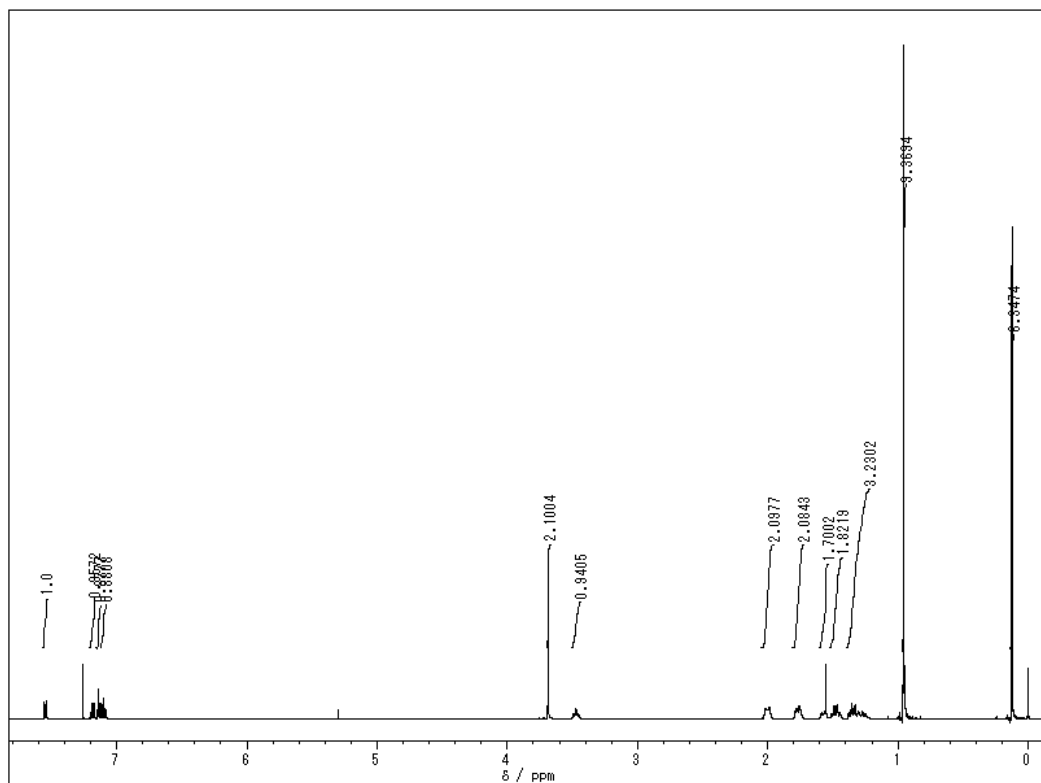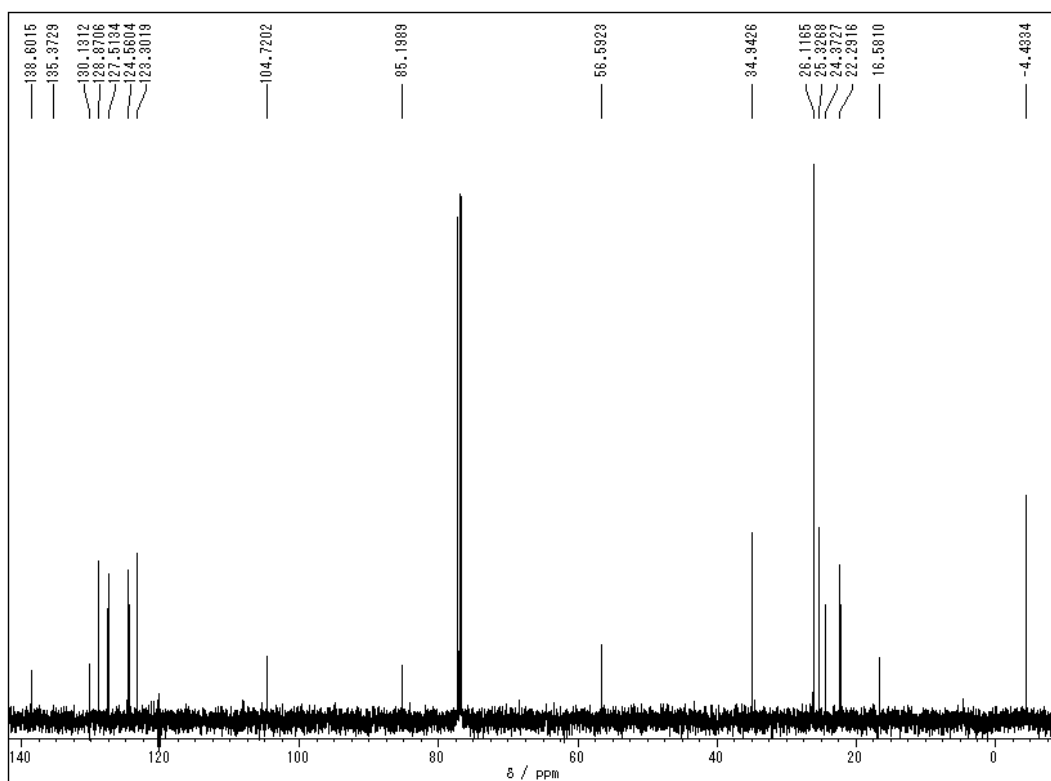

4t

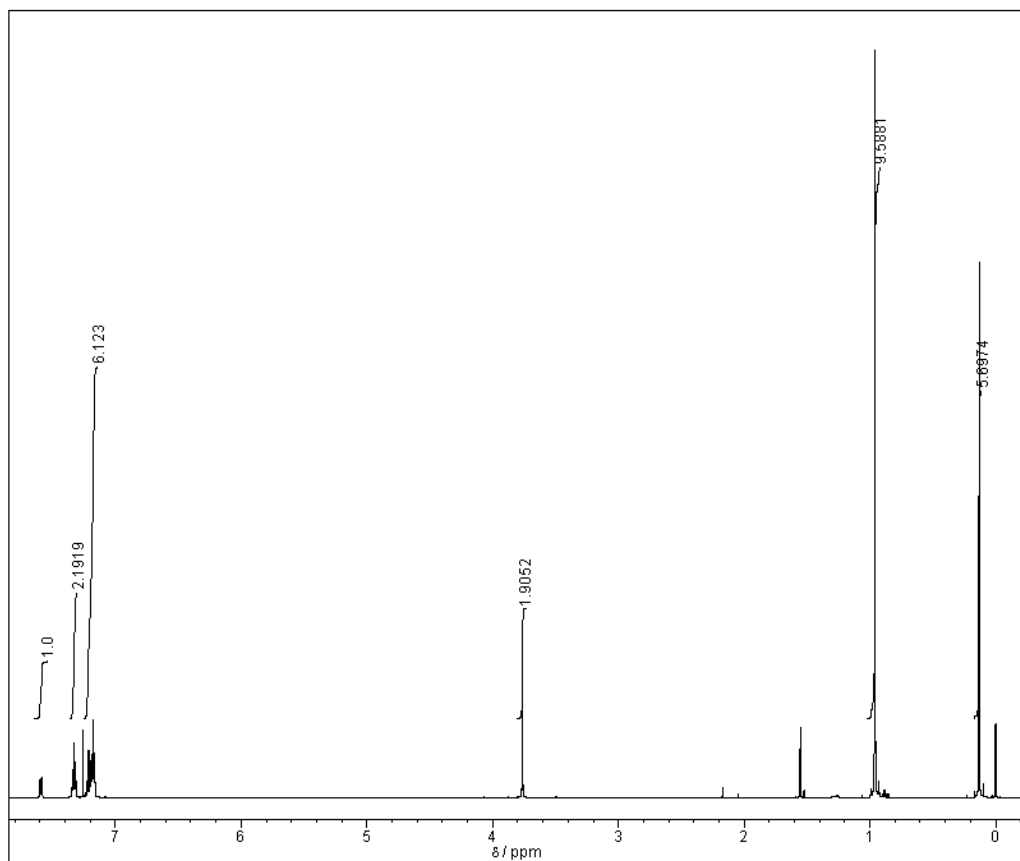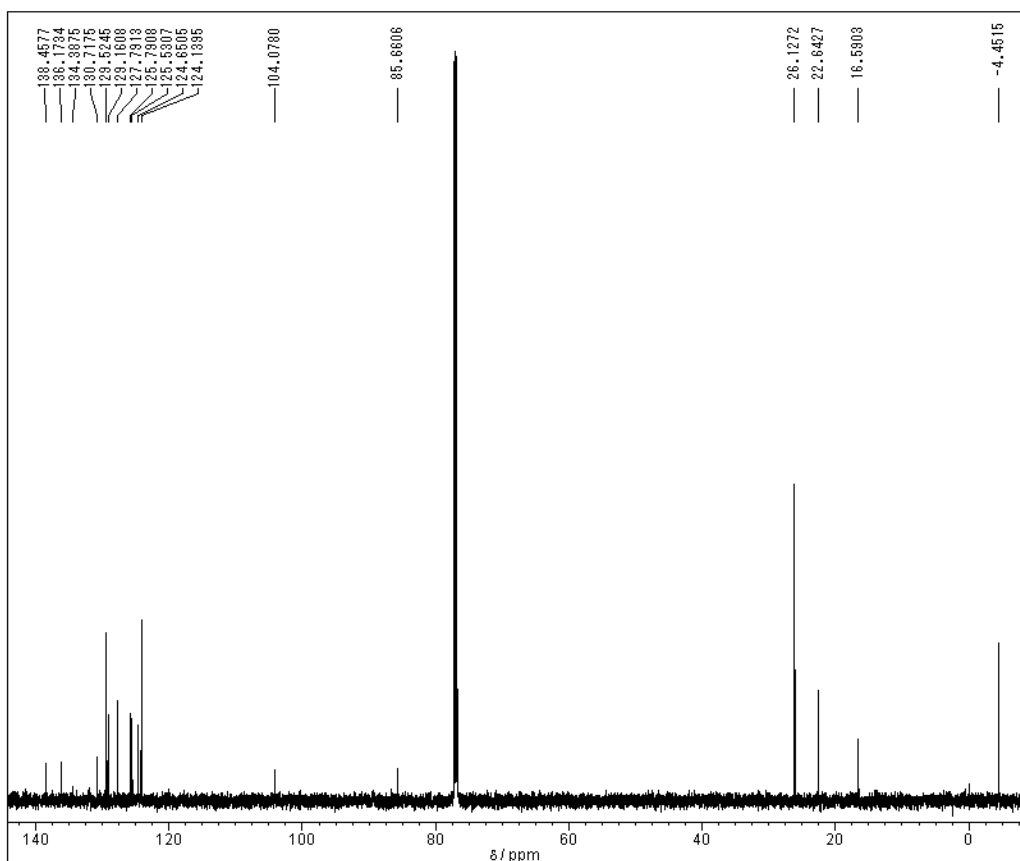

4u

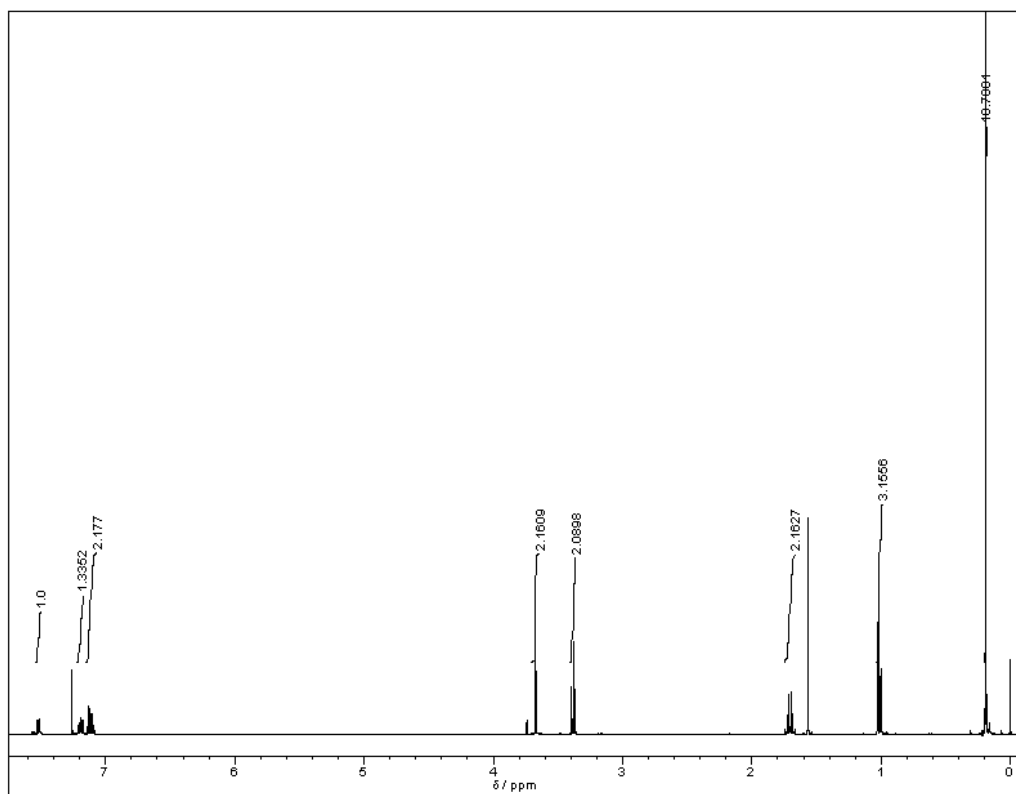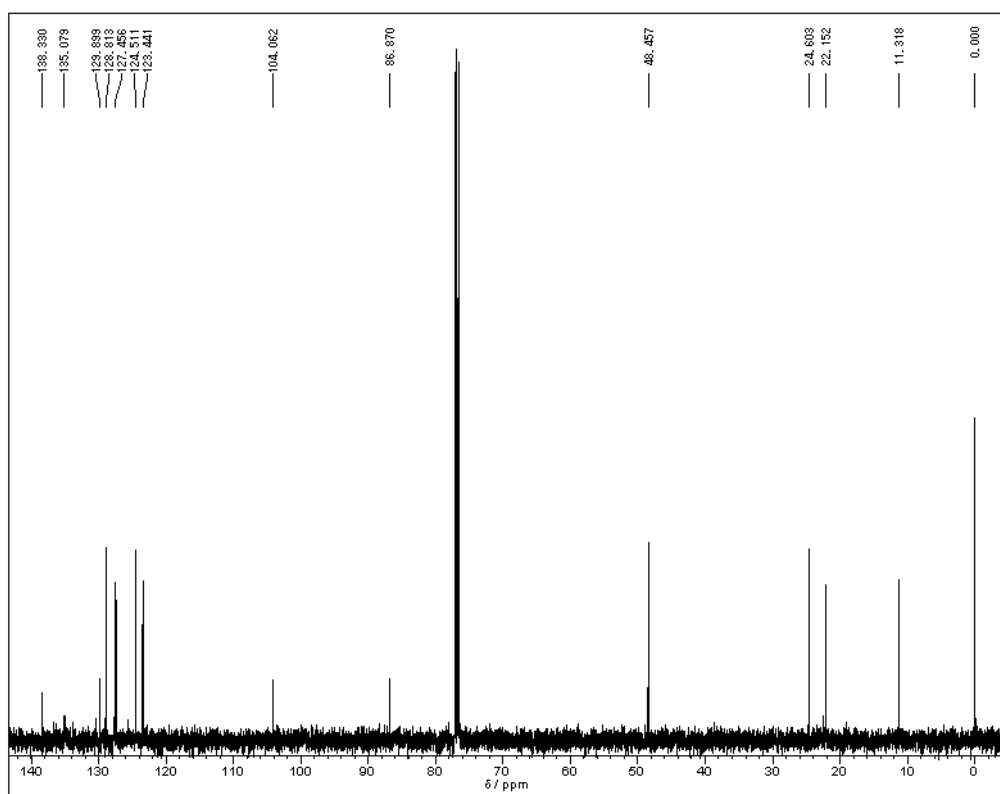

4v

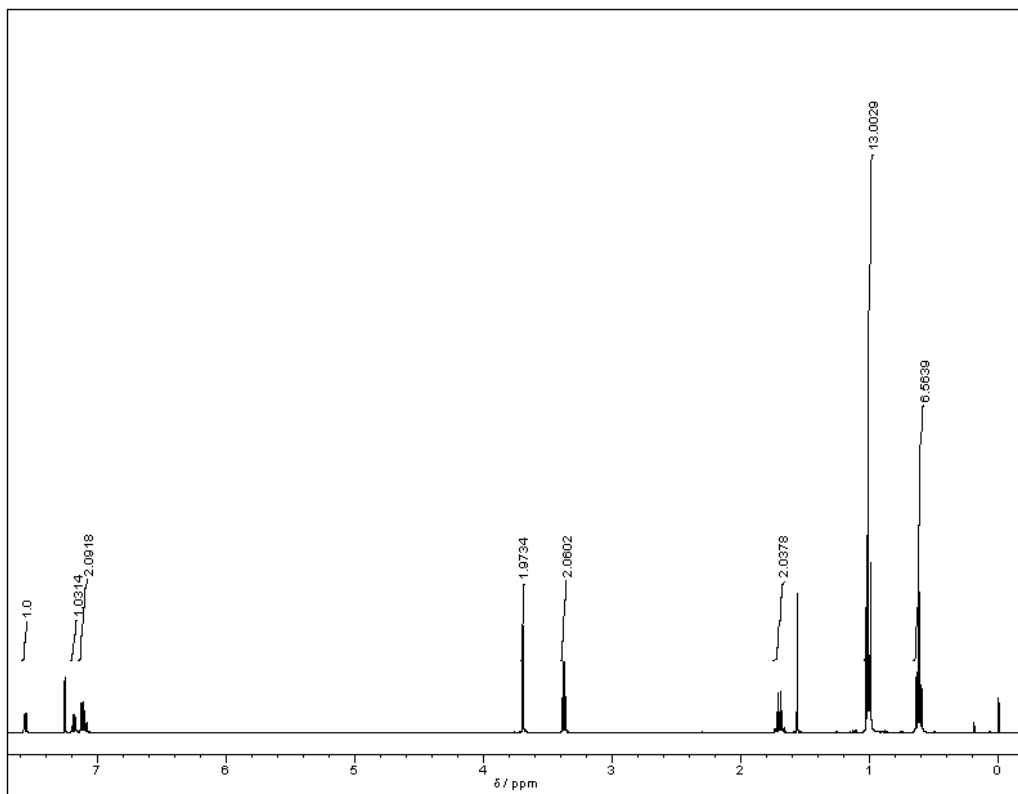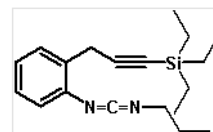

ObsNuc <sup>1</sup>H  
ObsFreq 500.0 MHz  
Solvent CDCl<sub>3</sub>

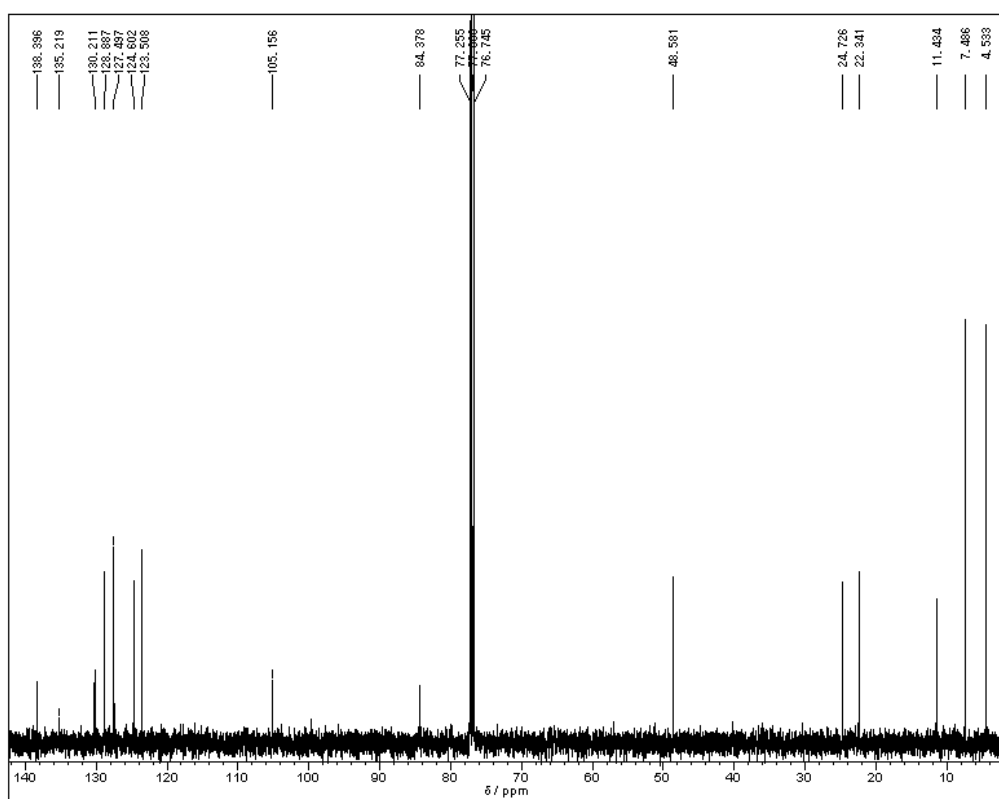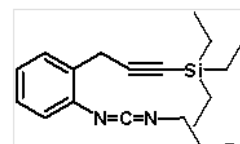

ObsNuc <sup>13</sup>C  
ObsFreq 125.65 MHz  
Solvent CDCl<sub>3</sub>

5a

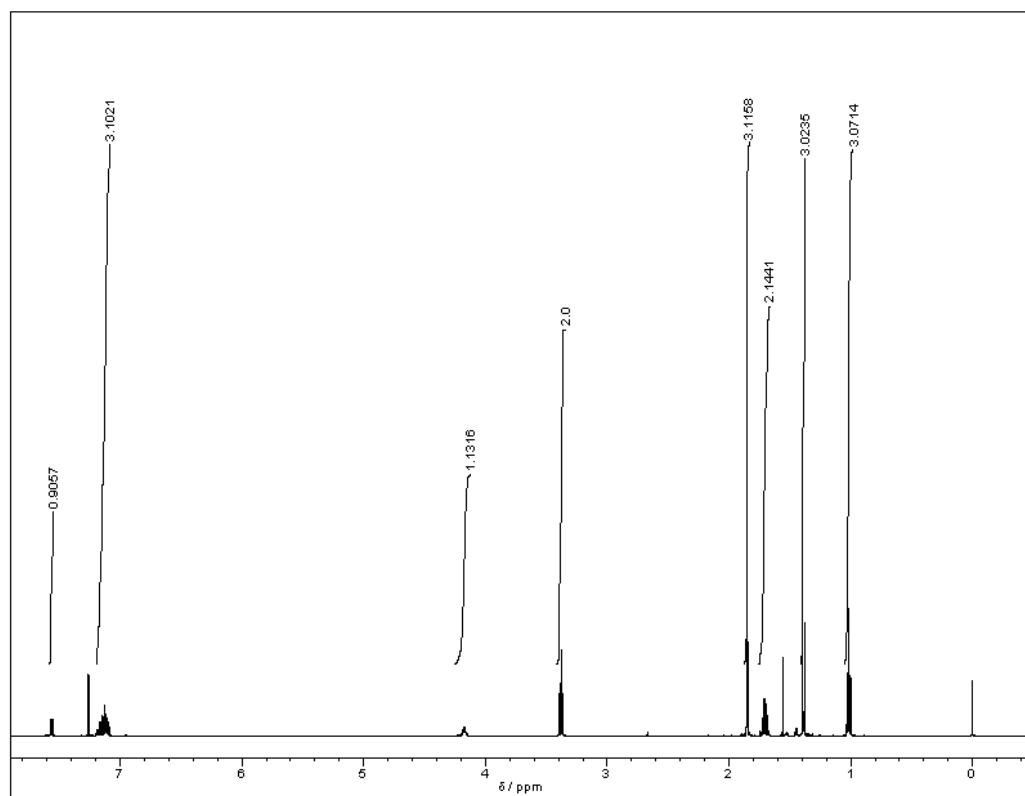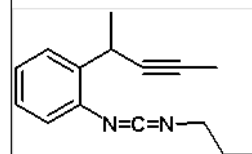

ObsNuc <sup>1</sup>H  
ObsFreq 500.0 MHz  
Solvent CDCl<sub>3</sub>

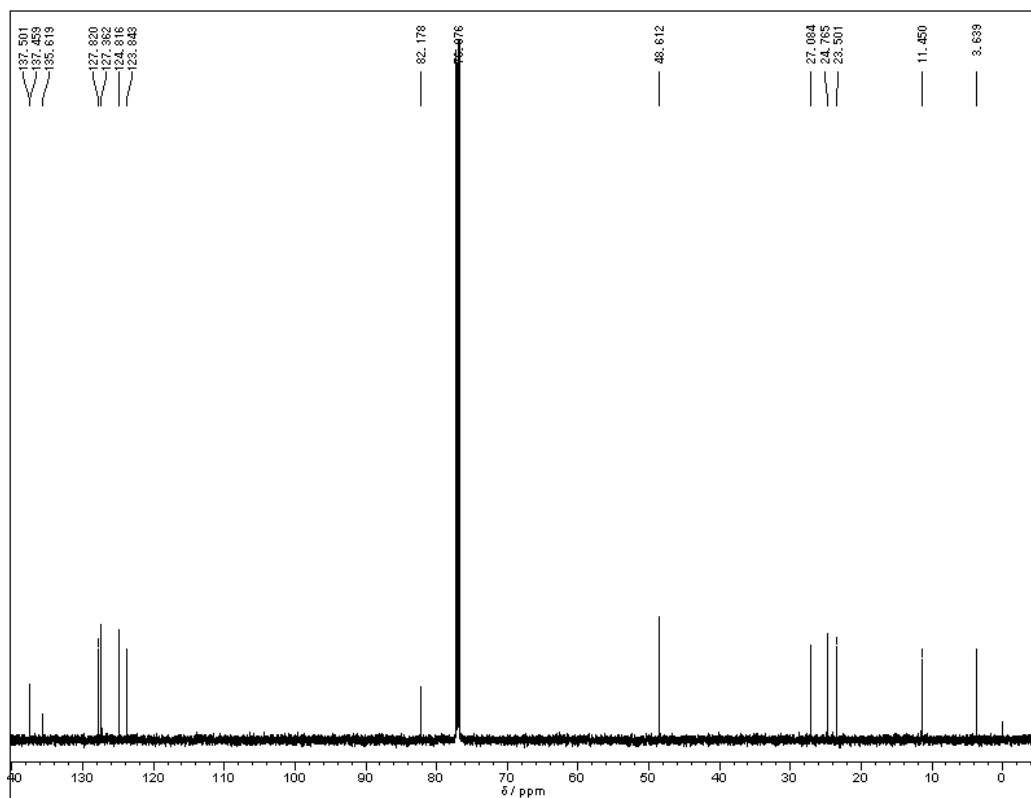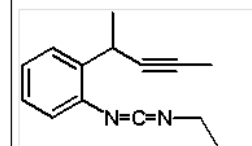

ObsNuc <sup>13</sup>C  
ObsFreq 150.9 MHz  
Solvent CDCl<sub>3</sub>

5b

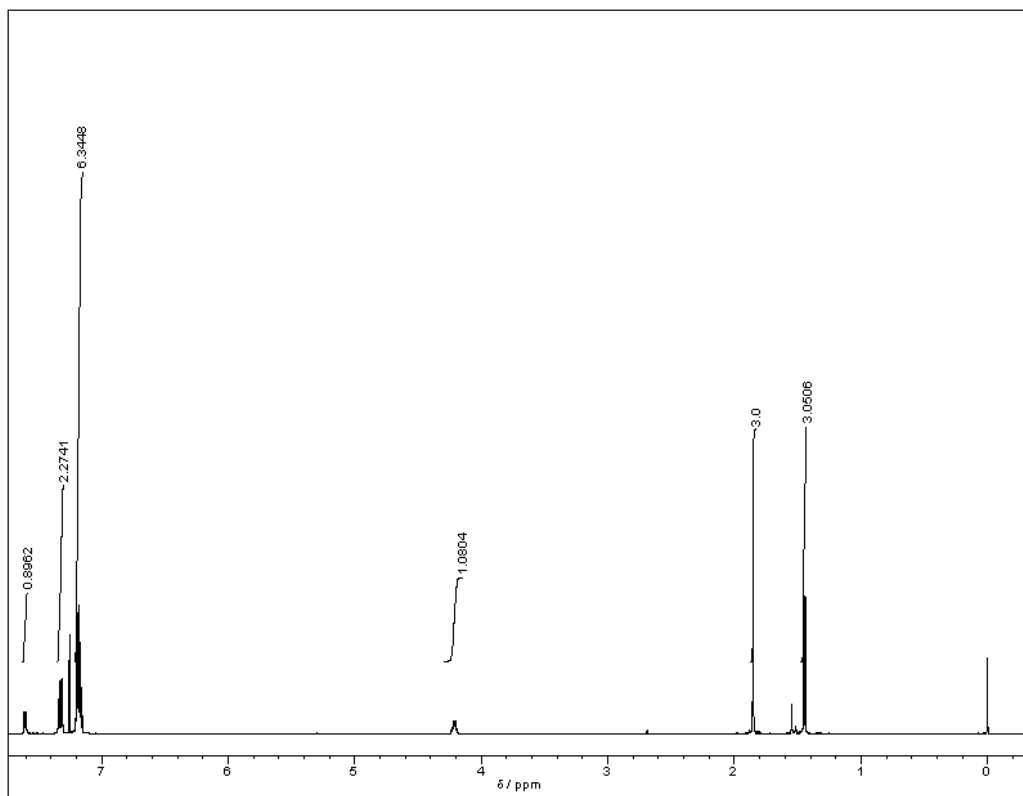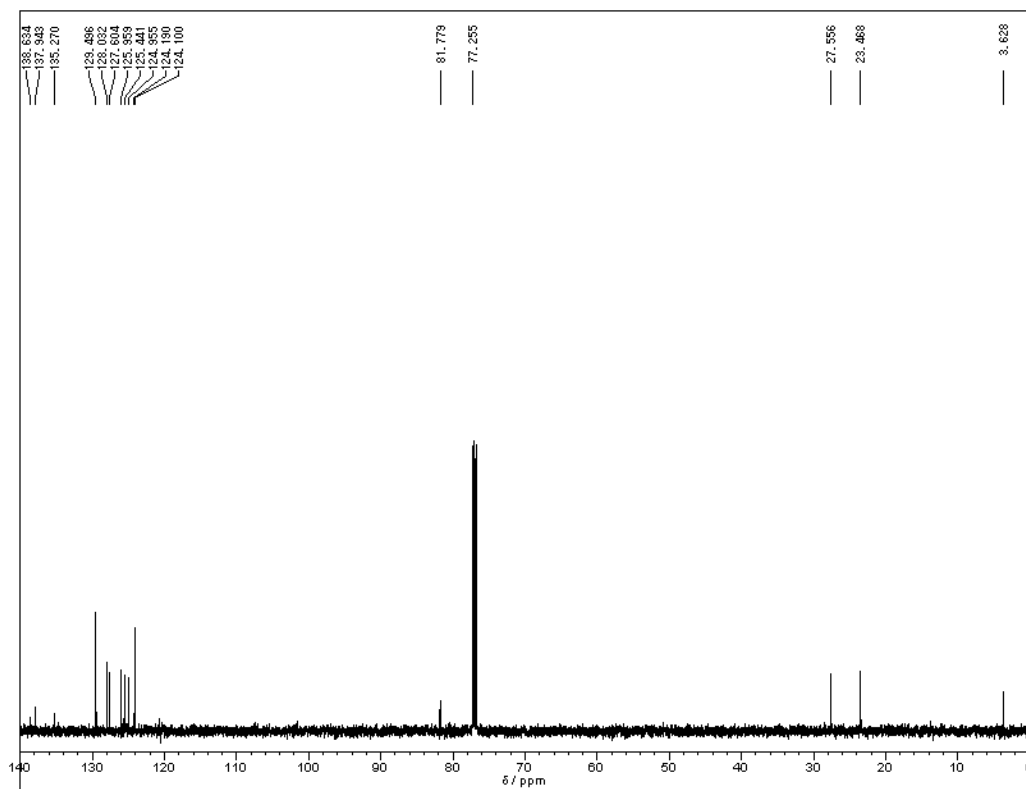



5c

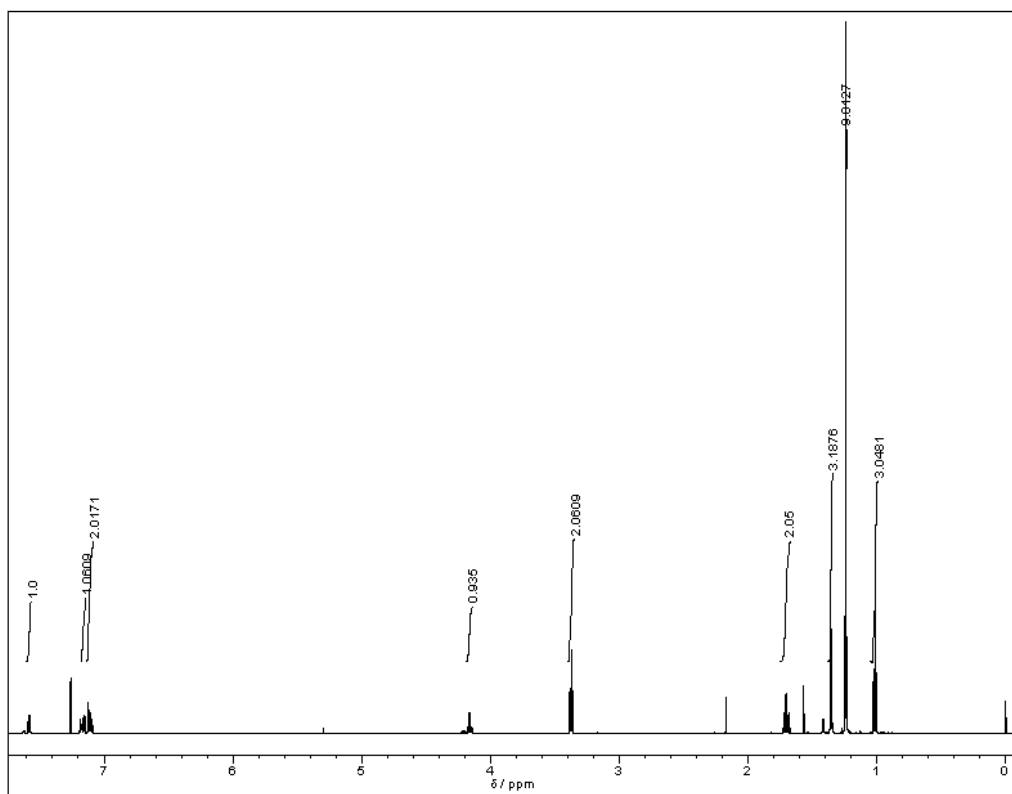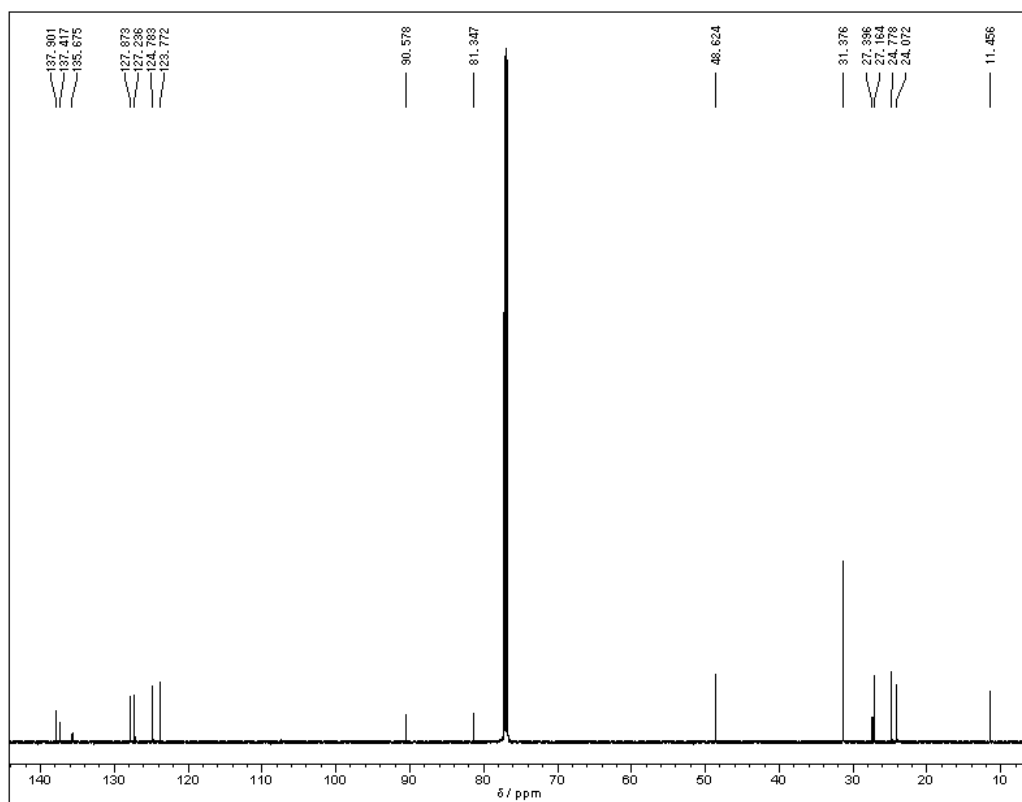

5d

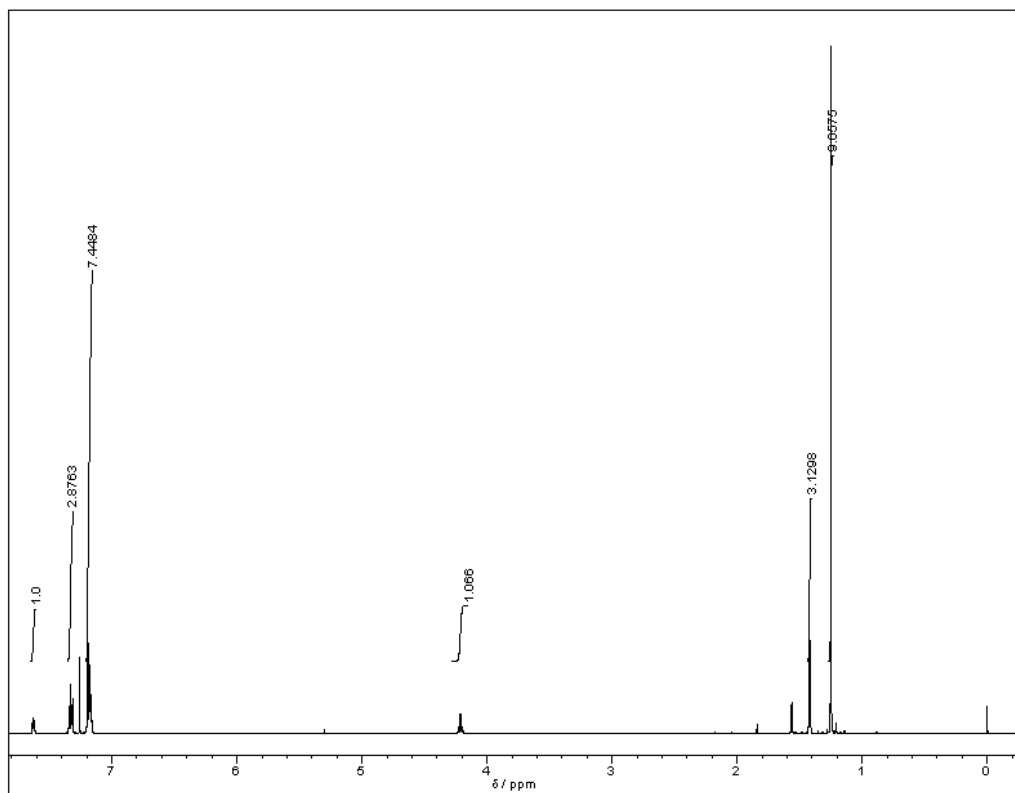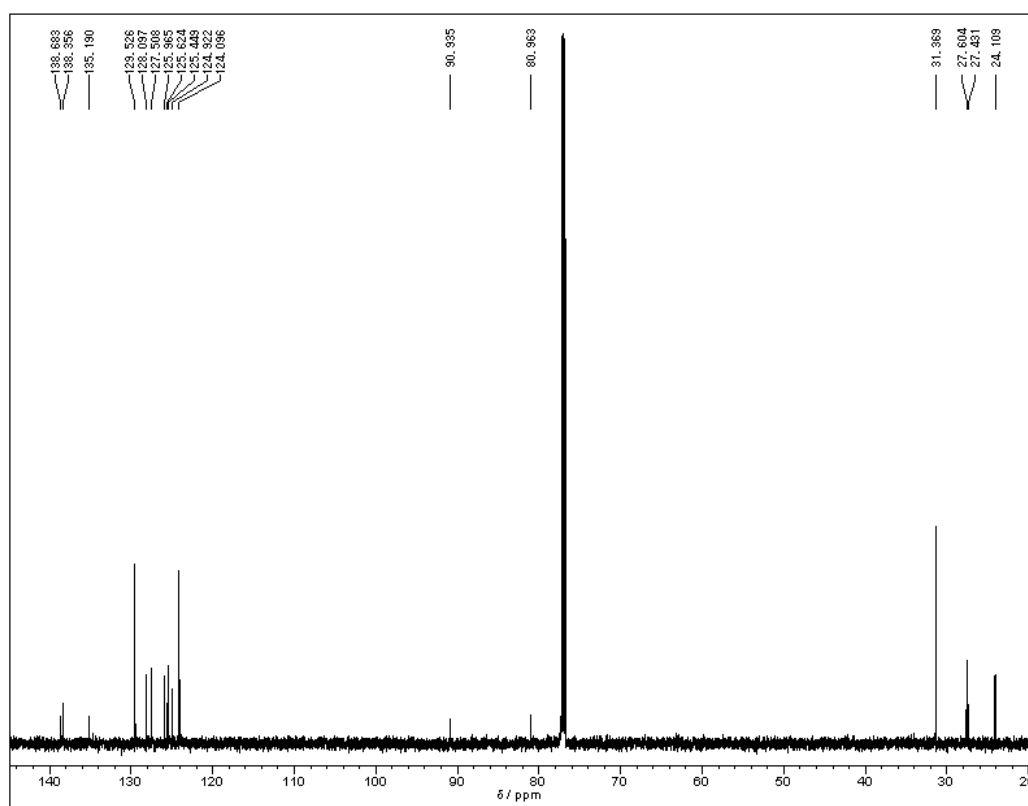

5e

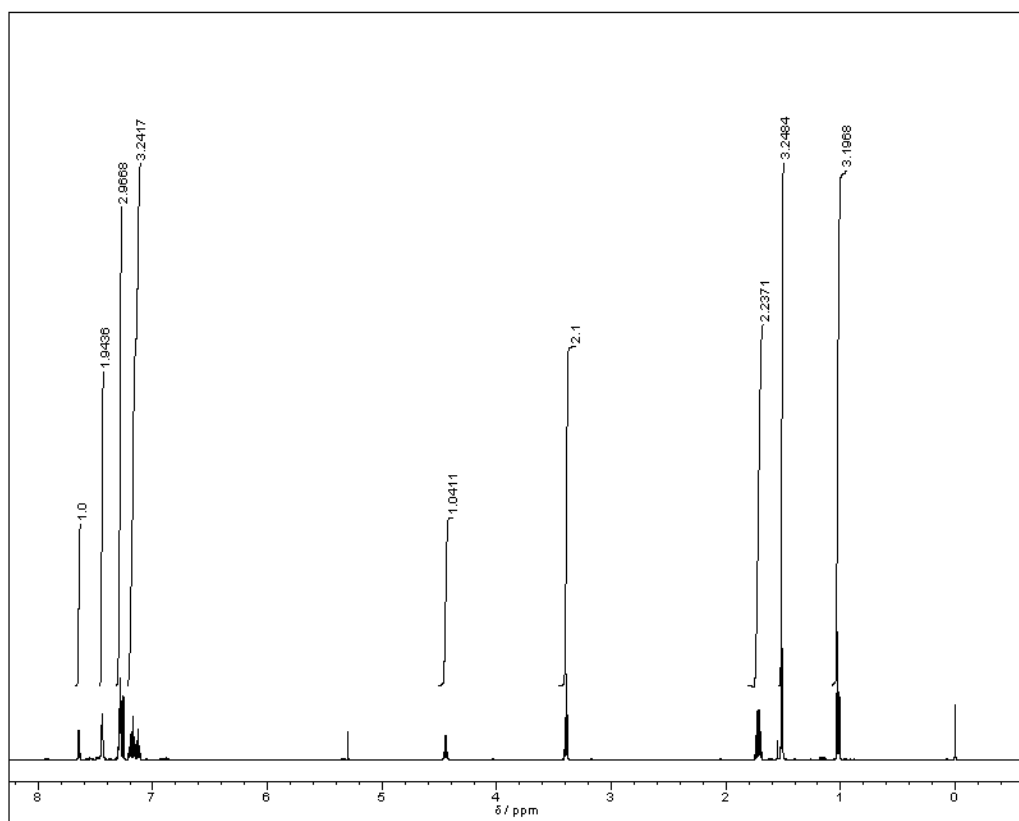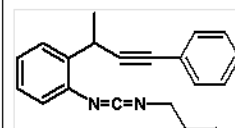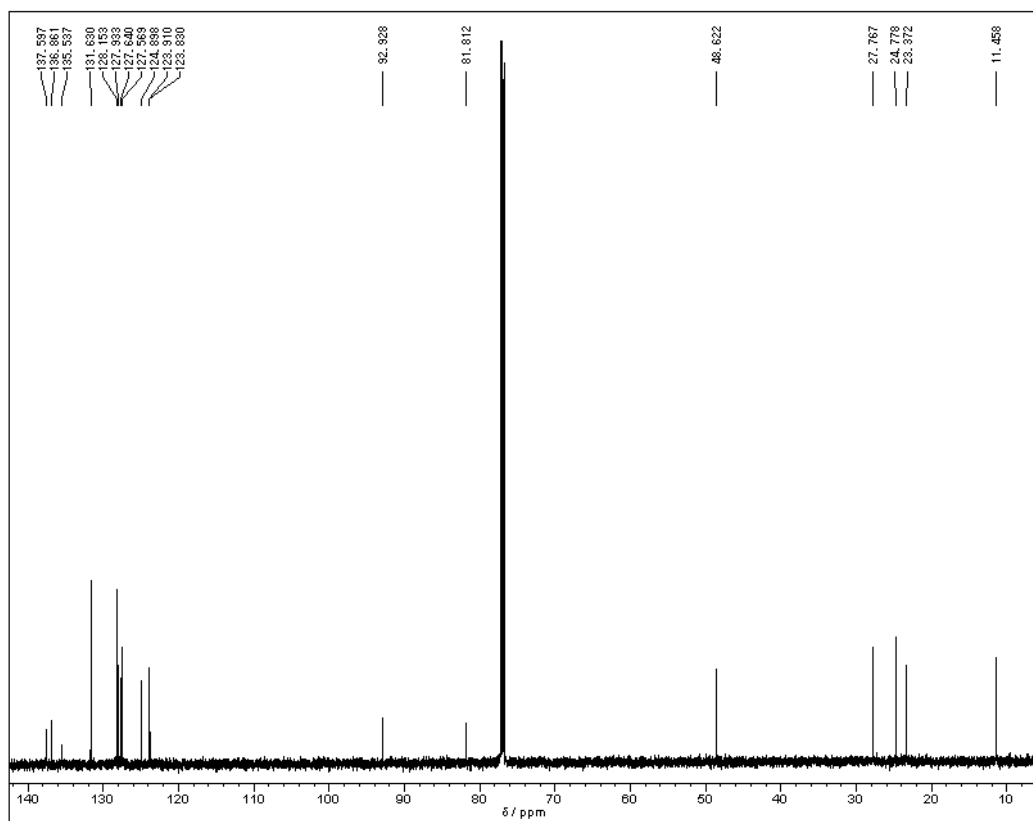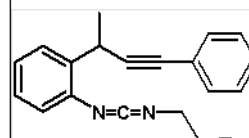

5f

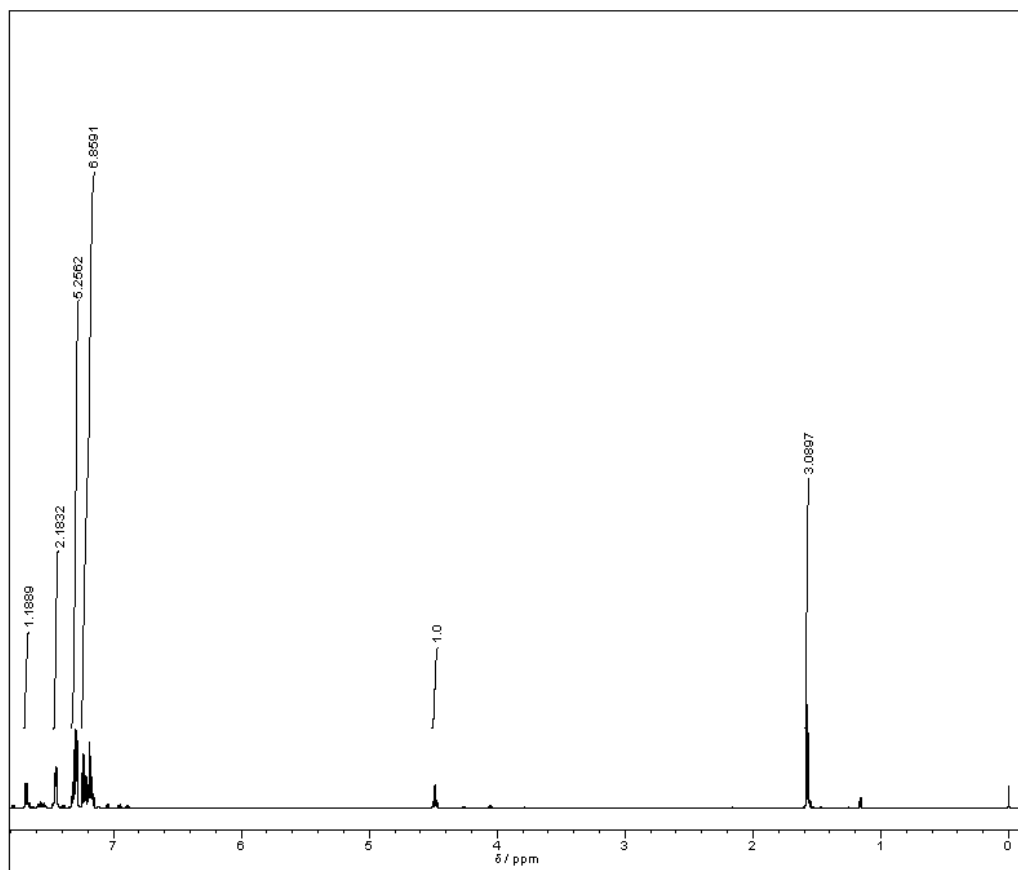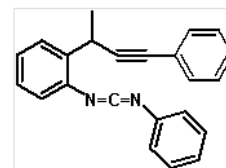

ObsNuc  $^1\text{H}$   
ObsFreq 600.13 MHz  
Solvent  $\text{CDCl}_3$

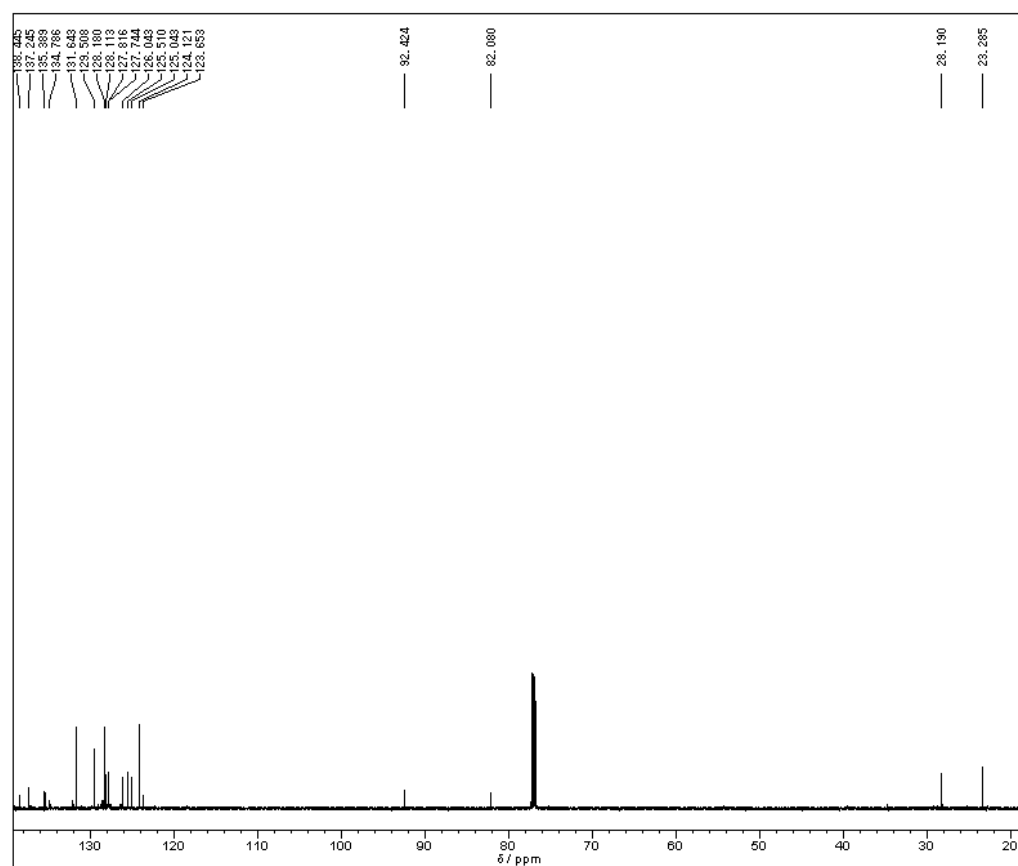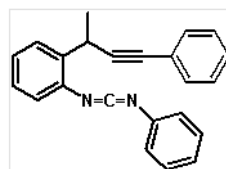

ObsNuc  $^{13}\text{C}$   
ObsFreq 150.9 MHz  
Solvent  $\text{CDCl}_3$

5g

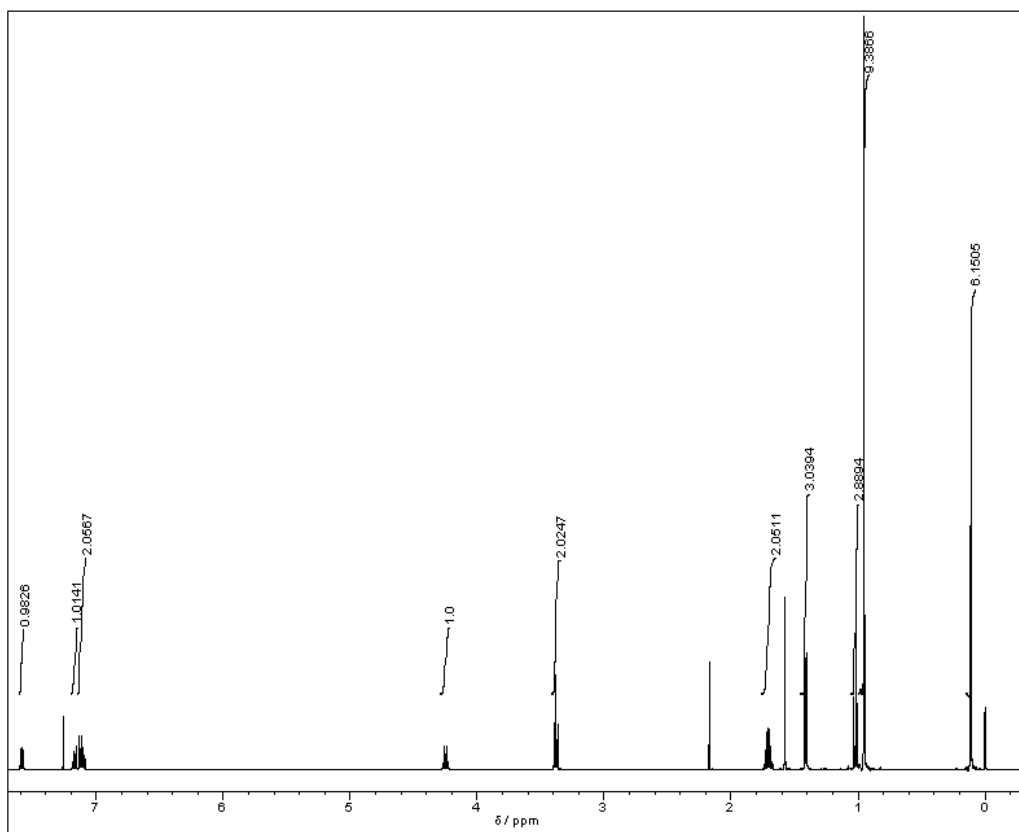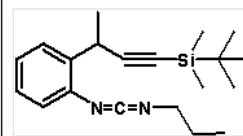

ObsNuc  $^1\text{H}$   
ObsFreq 500.0 MHz  
Solvent  $\text{CDCl}_3$

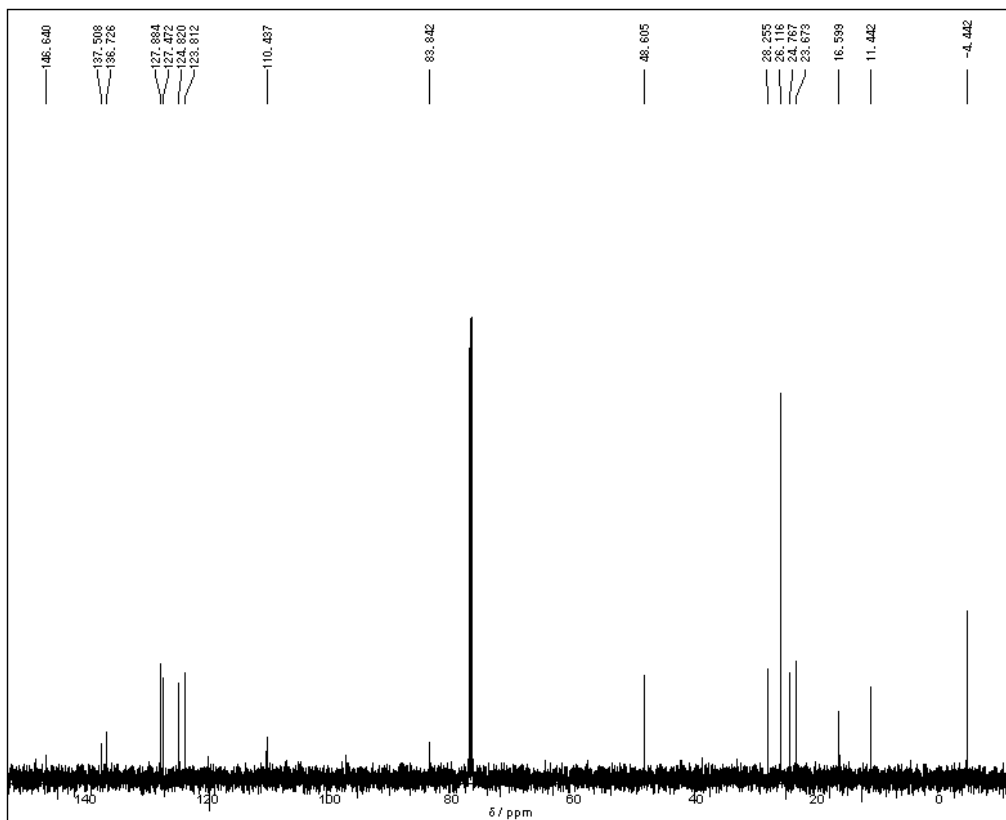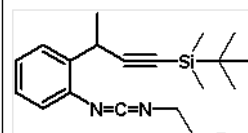

ObsNuc  $^{13}\text{C}$   
ObsFreq 125.65 MHz  
Solvent  $\text{CDCl}_3$

5h

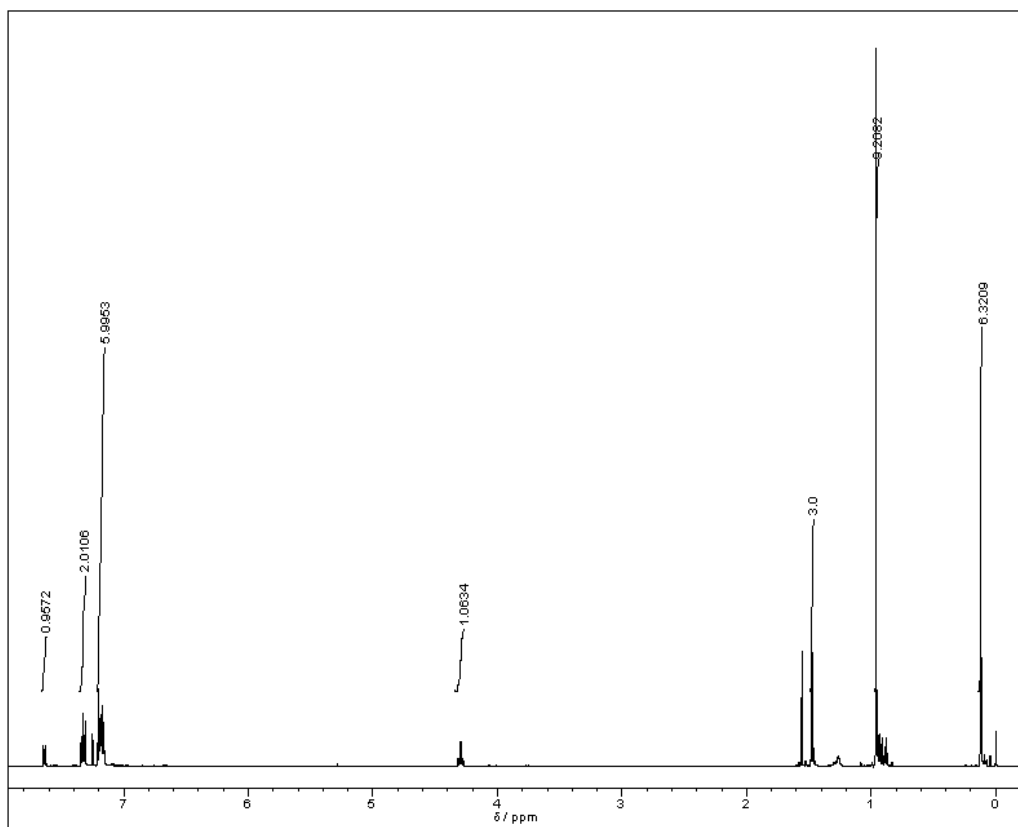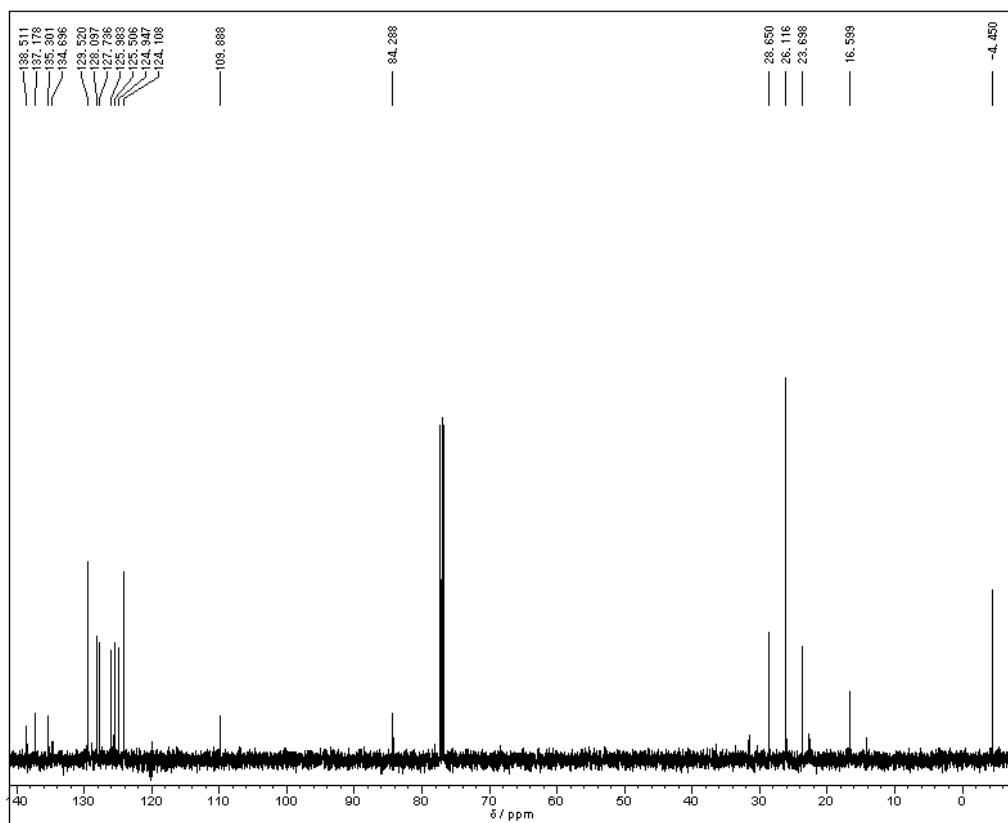

6a

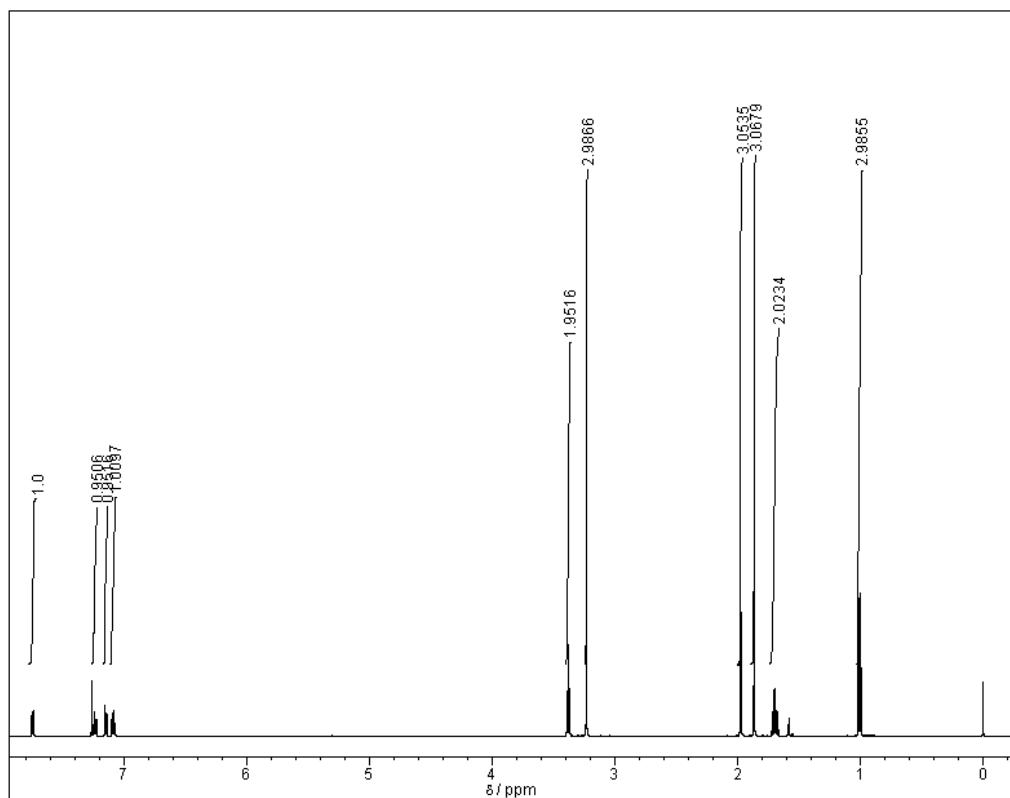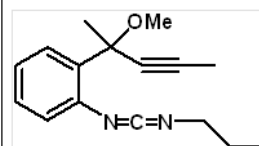

ObsNuc <sup>1</sup>H  
ObsFreq 600.13 MHz  
Solvent CDCl<sub>3</sub>

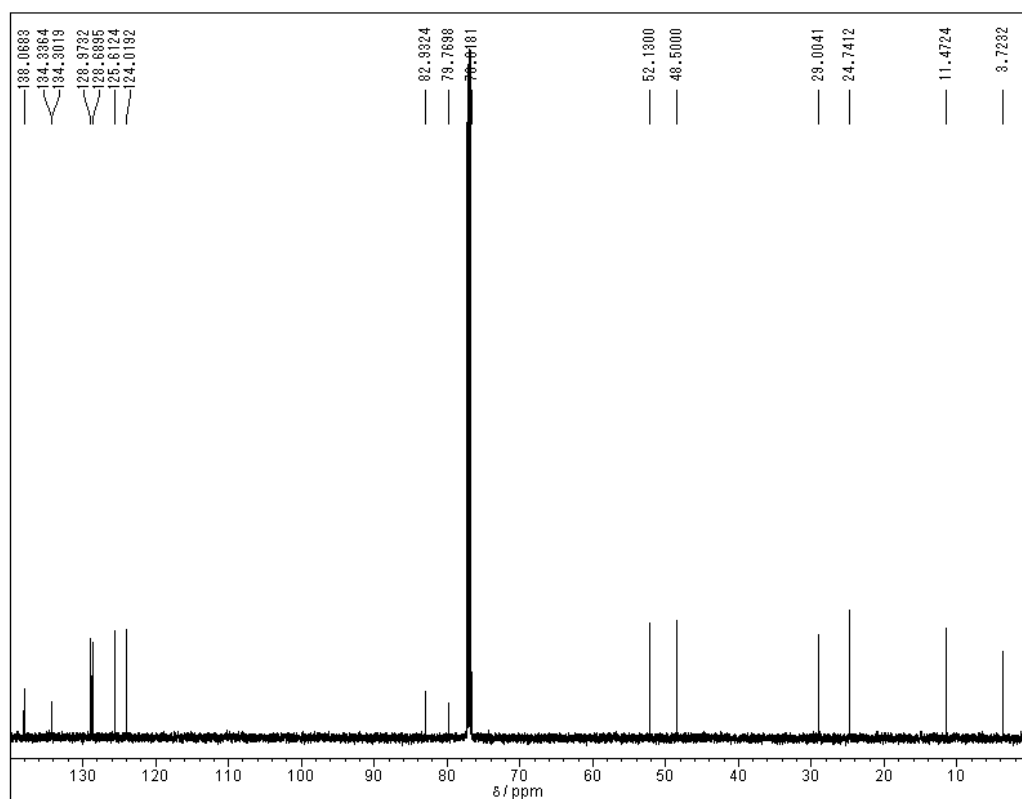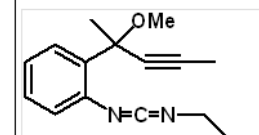

ObsFreq 150.9 MHz  
ObsNuc <sup>13</sup>C  
Solvent CDCl<sub>3</sub>

6b

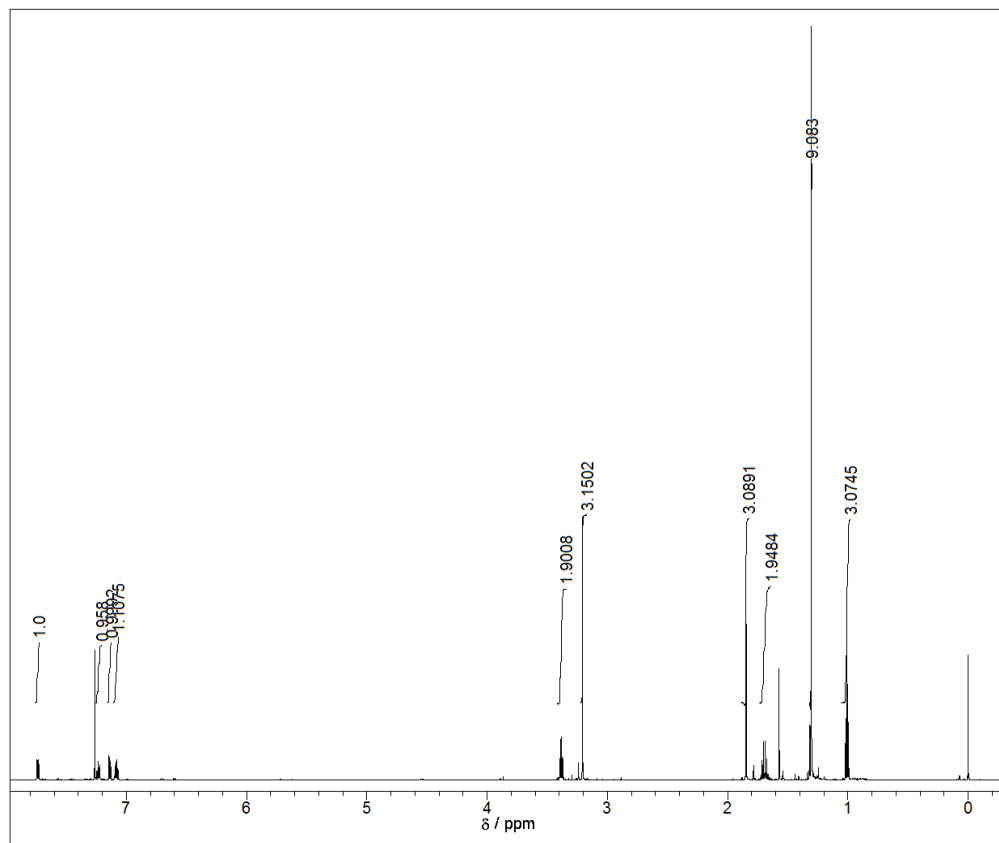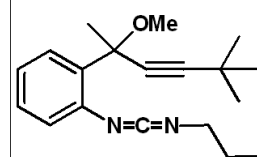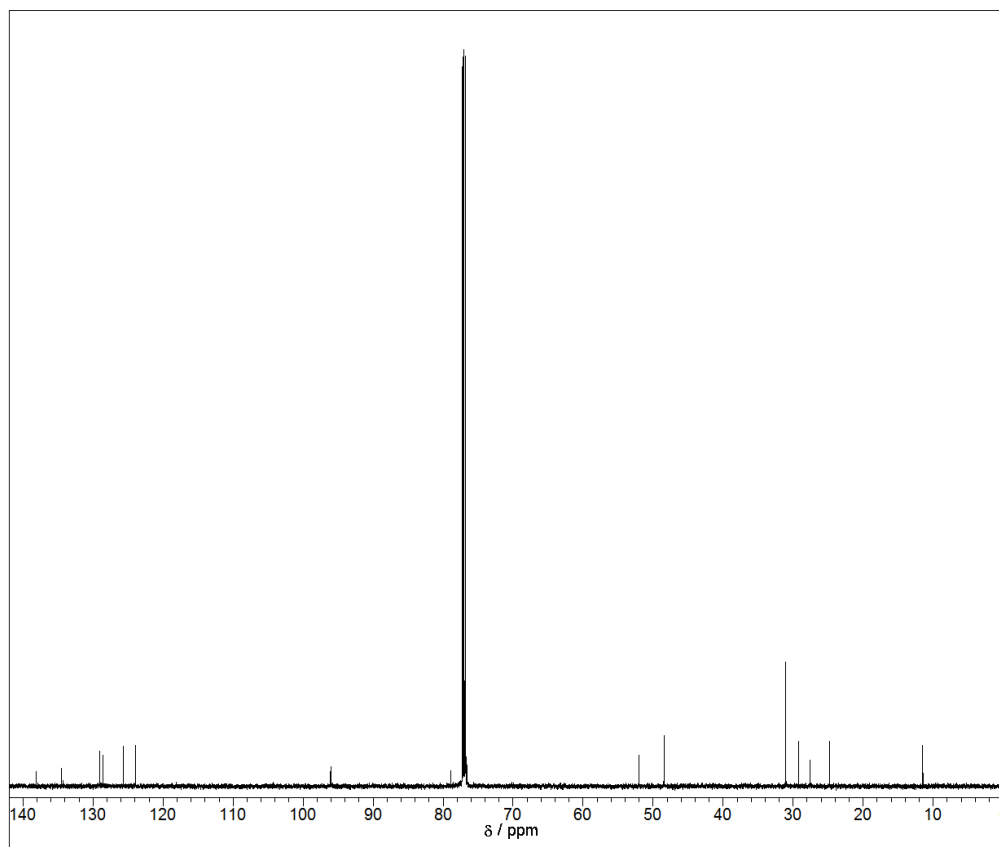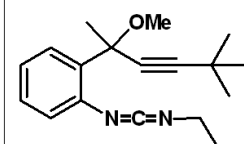



7a

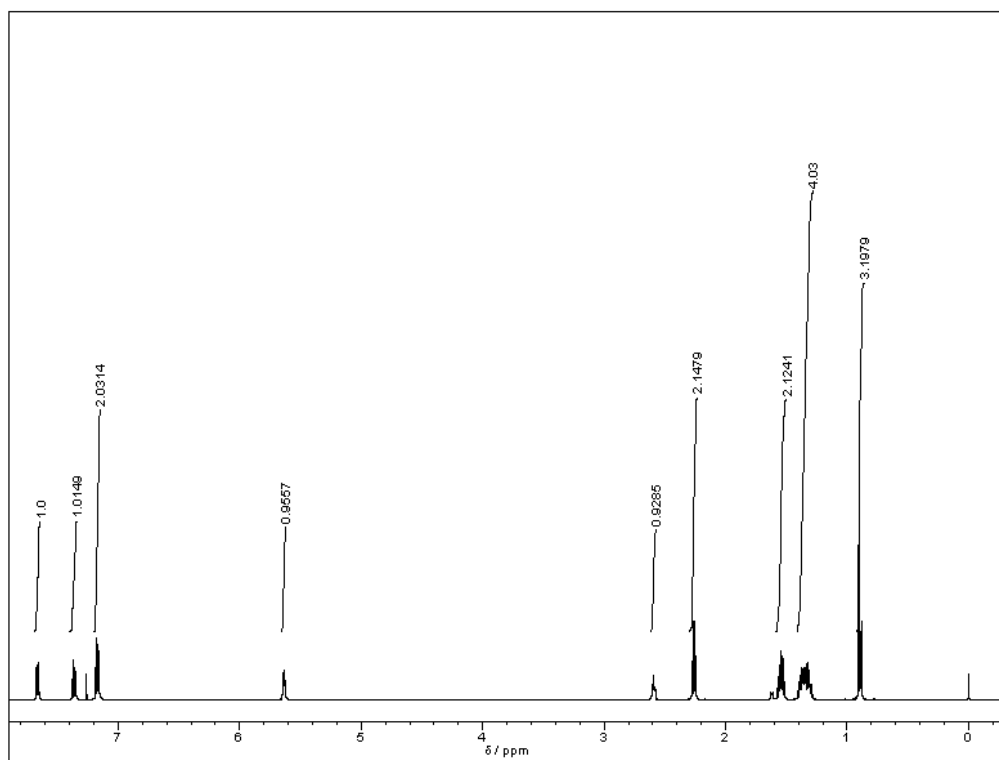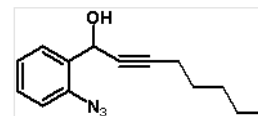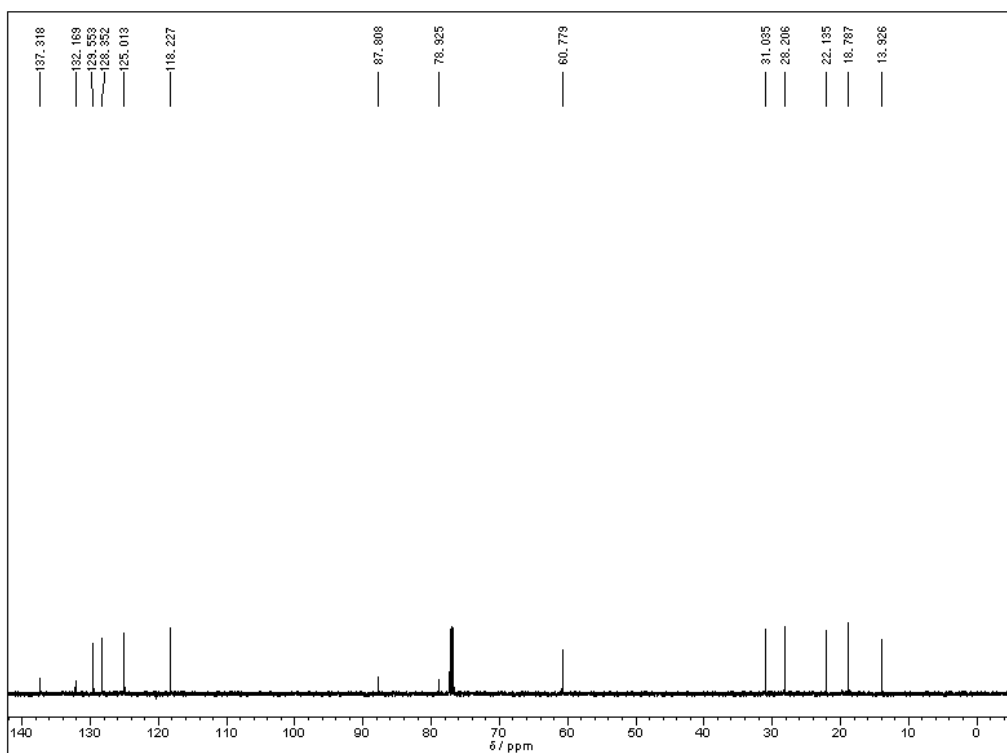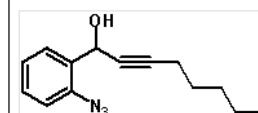

7b

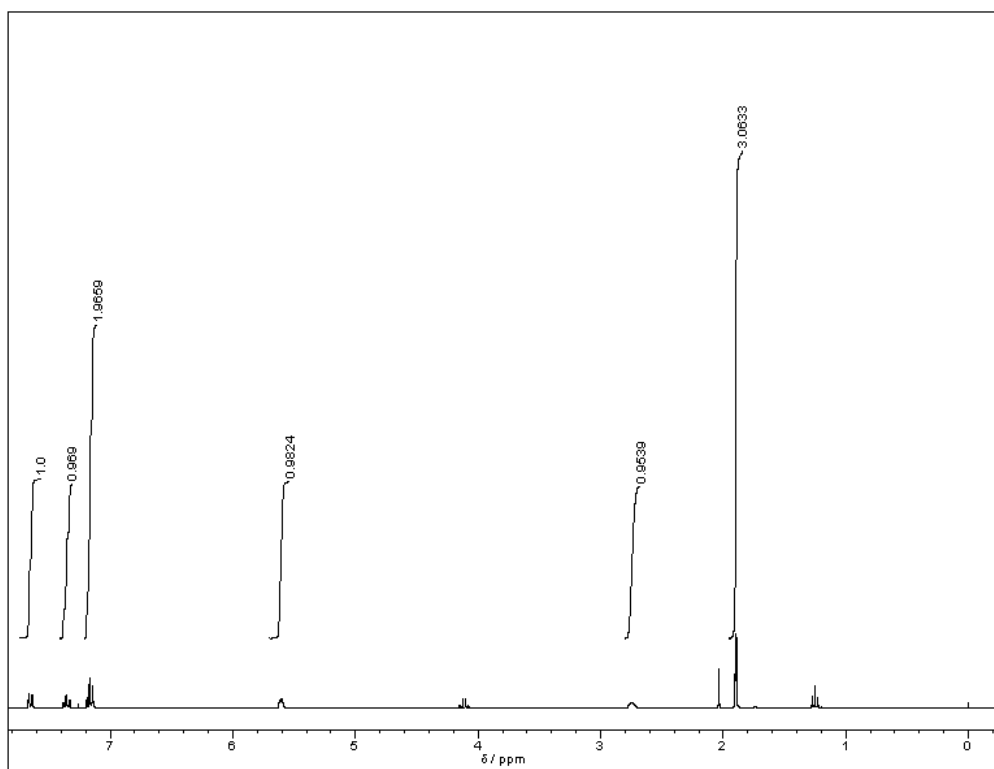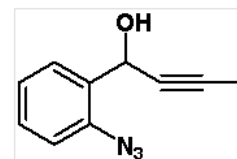

ObsNuc <sup>1</sup>H  
ObsFreq 300.01 MHz  
Solvent CDCl<sub>3</sub>

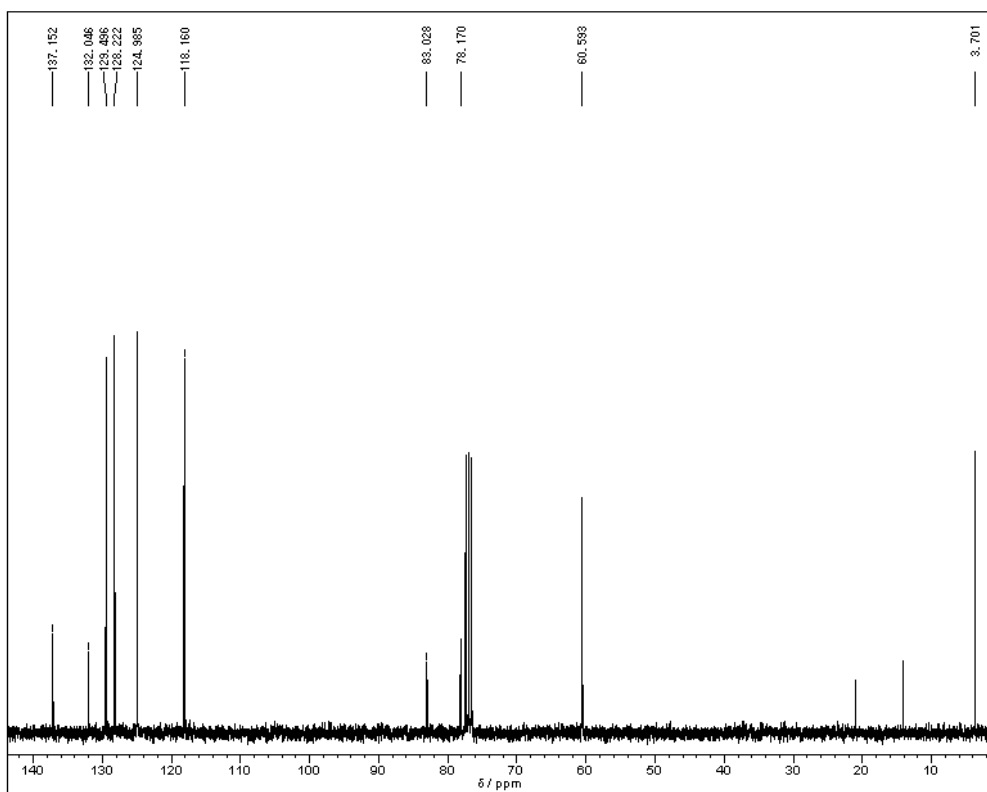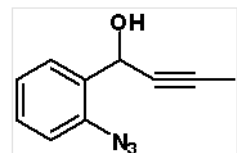

ObsNuc <sup>13</sup>C  
ObsFreq 75.44 MHz  
Solvent CDCl<sub>3</sub>

7c

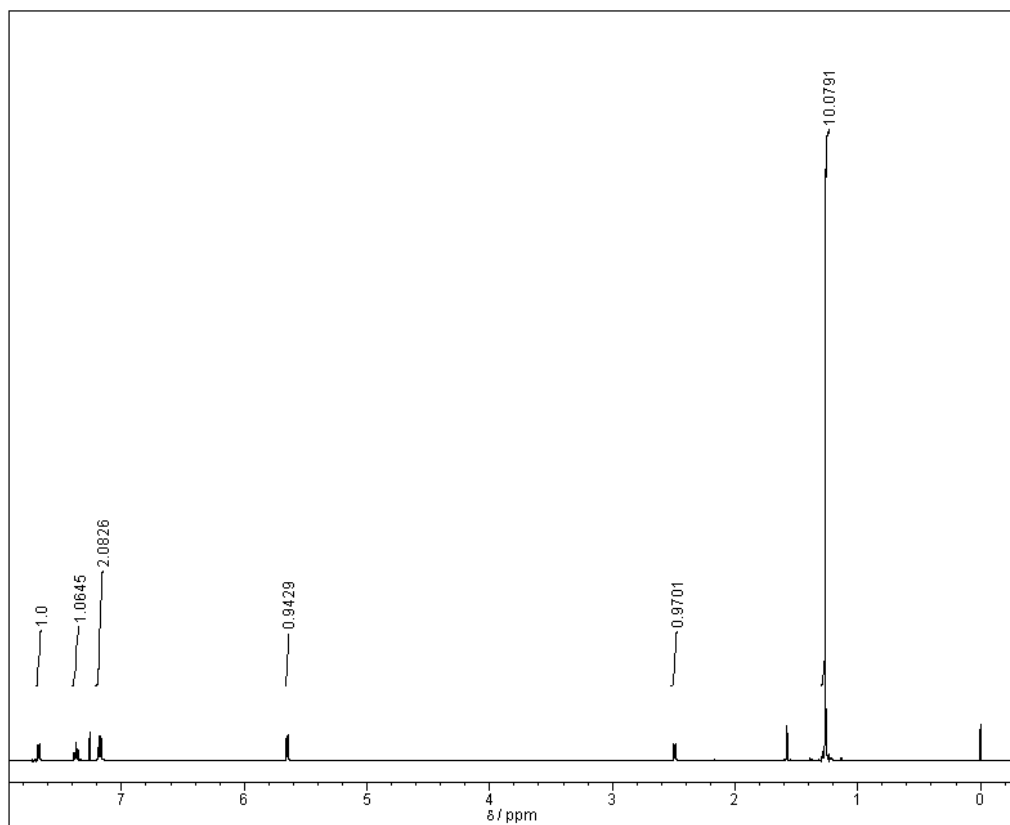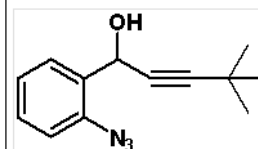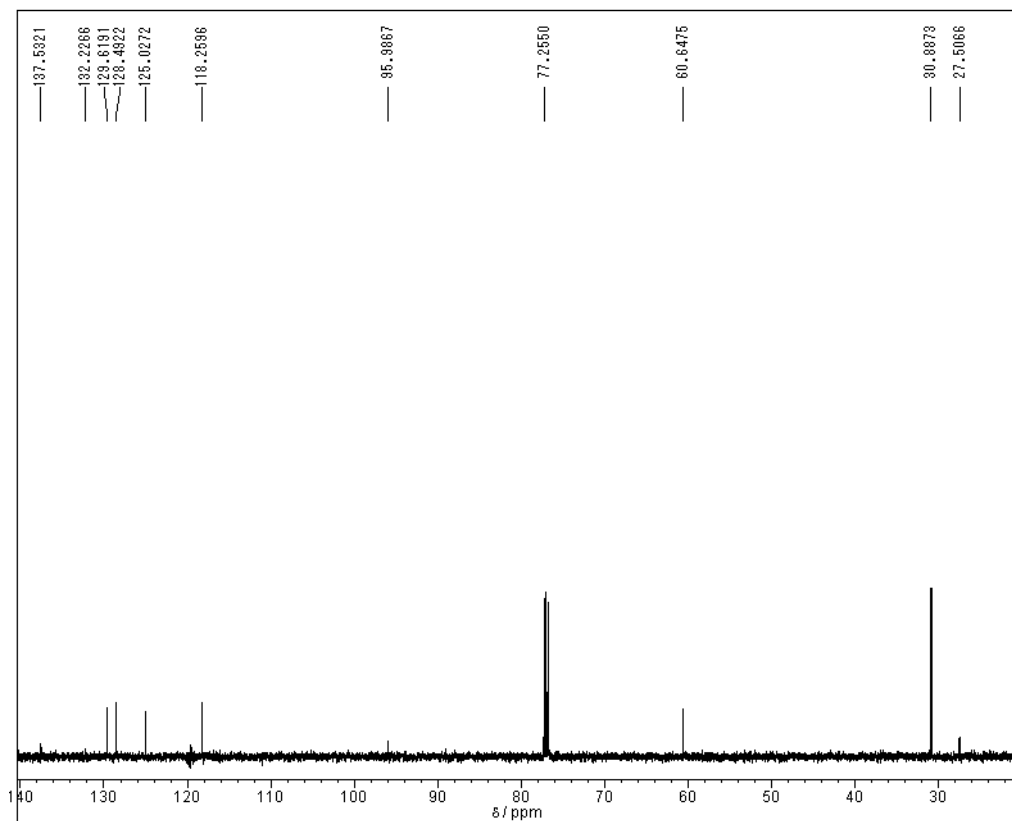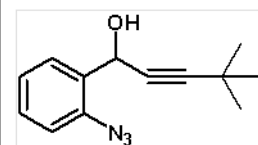

7d

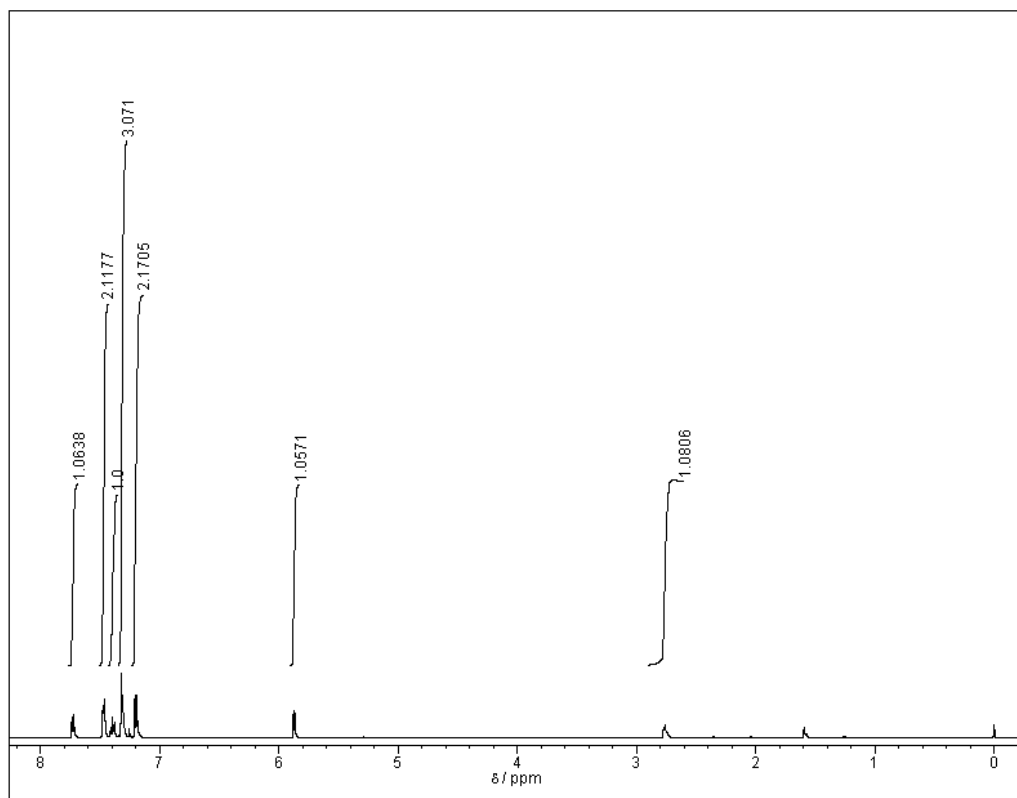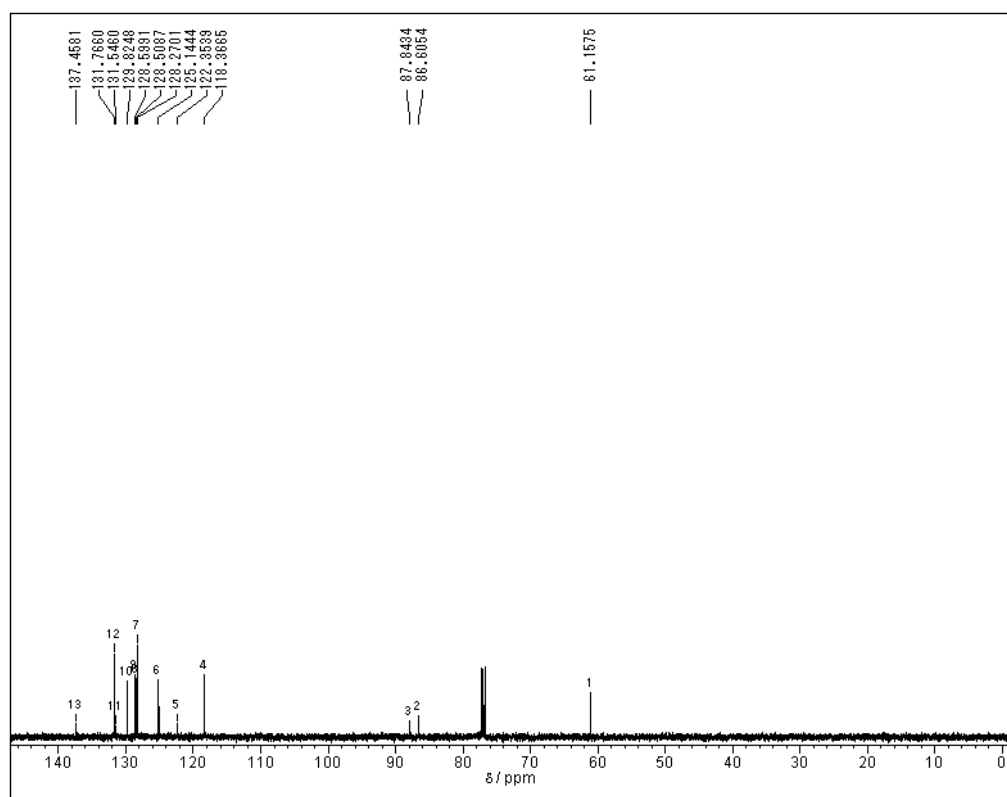

7e

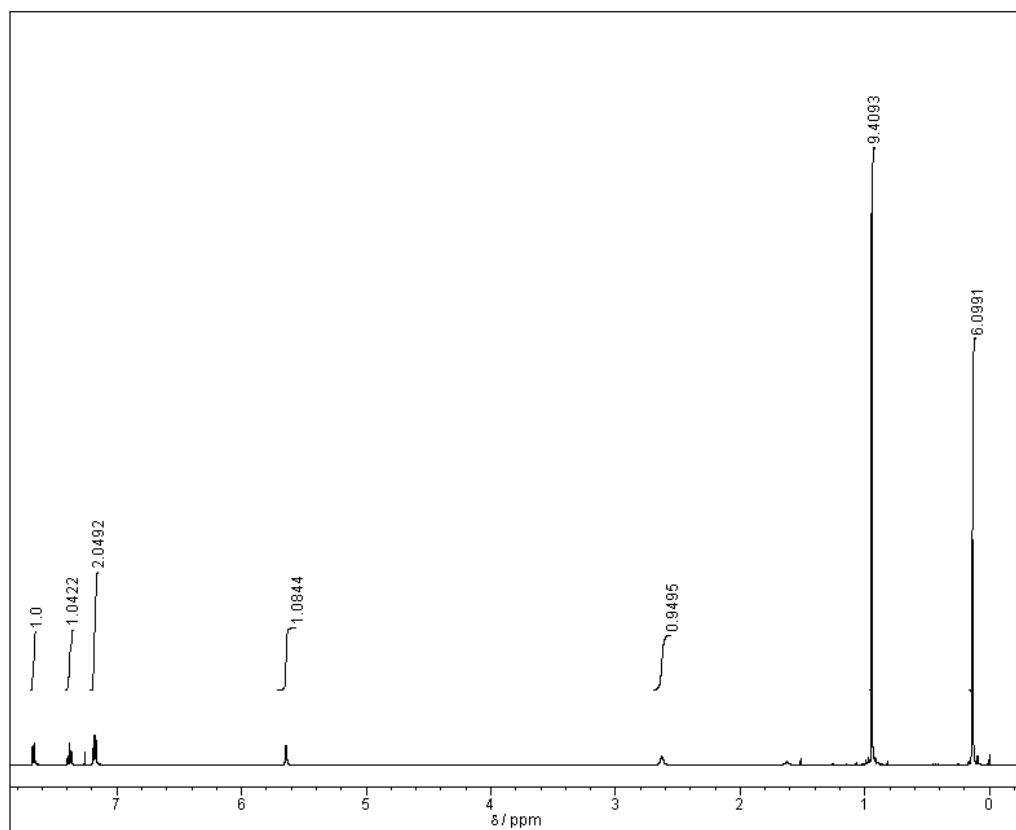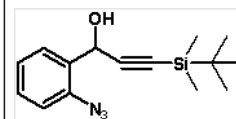

ObsNuc <sup>1</sup>H  
ObsFreq 500.0 MHz  
Solvent CDCl<sub>3</sub>

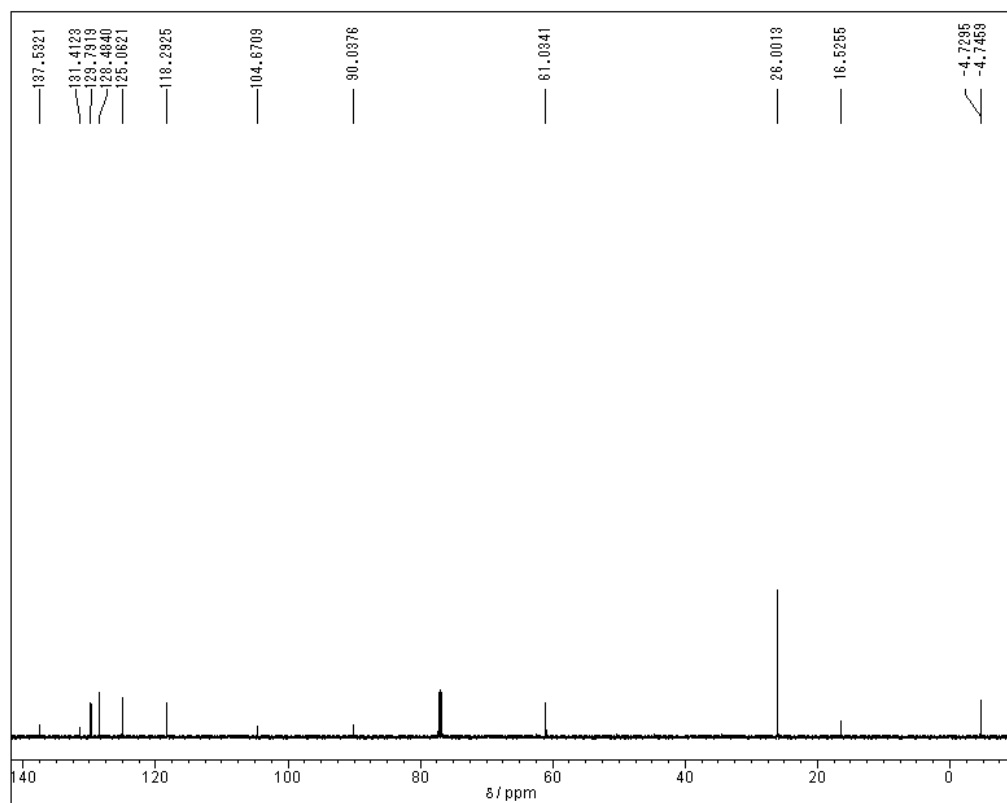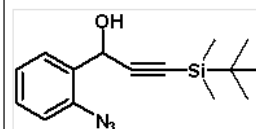

ObsNuc <sup>13</sup>C  
ObsFreq 125.65 MHz  
Solvent CDCl<sub>3</sub>

7f

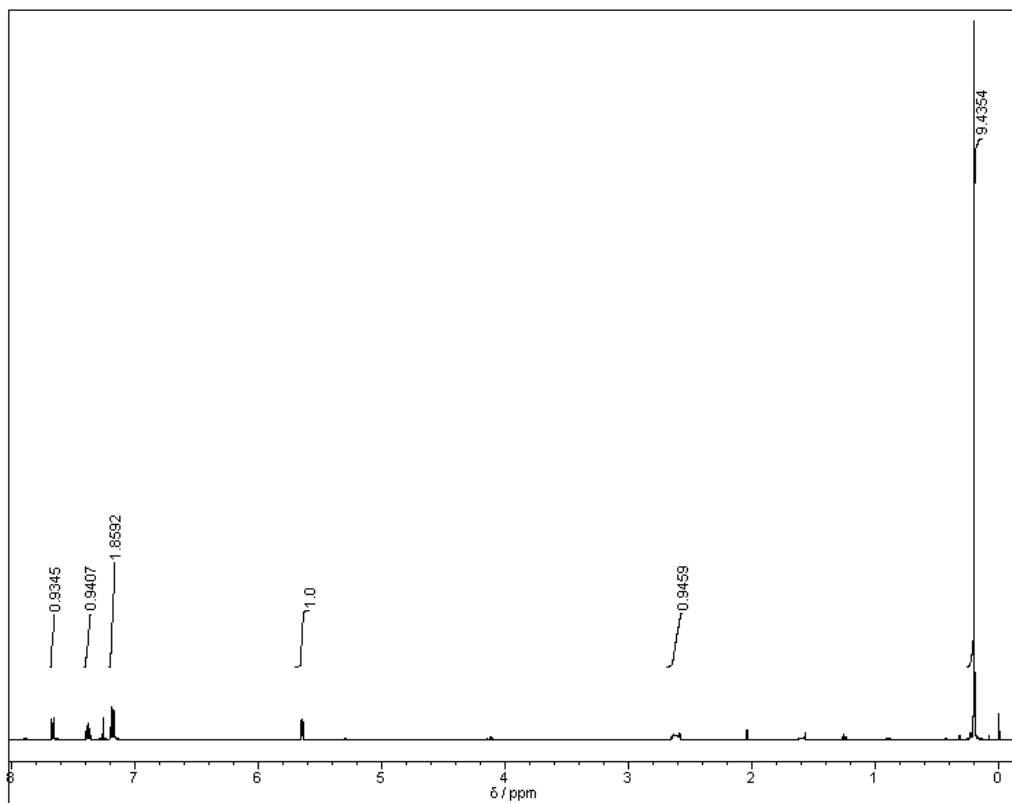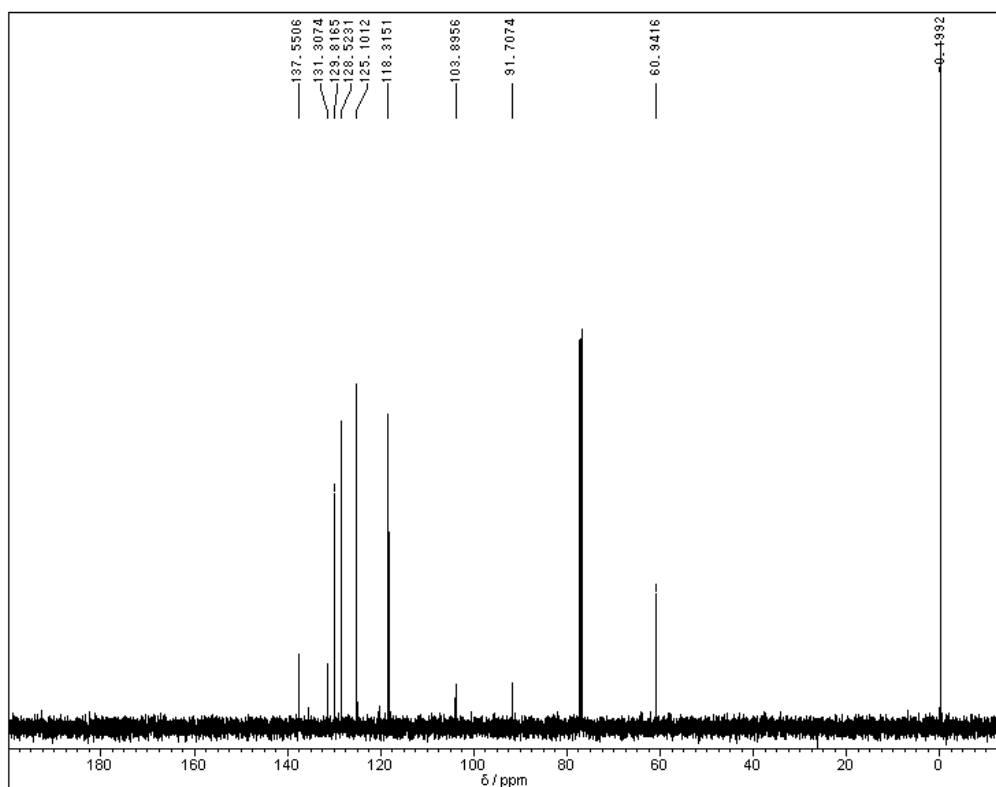

8a

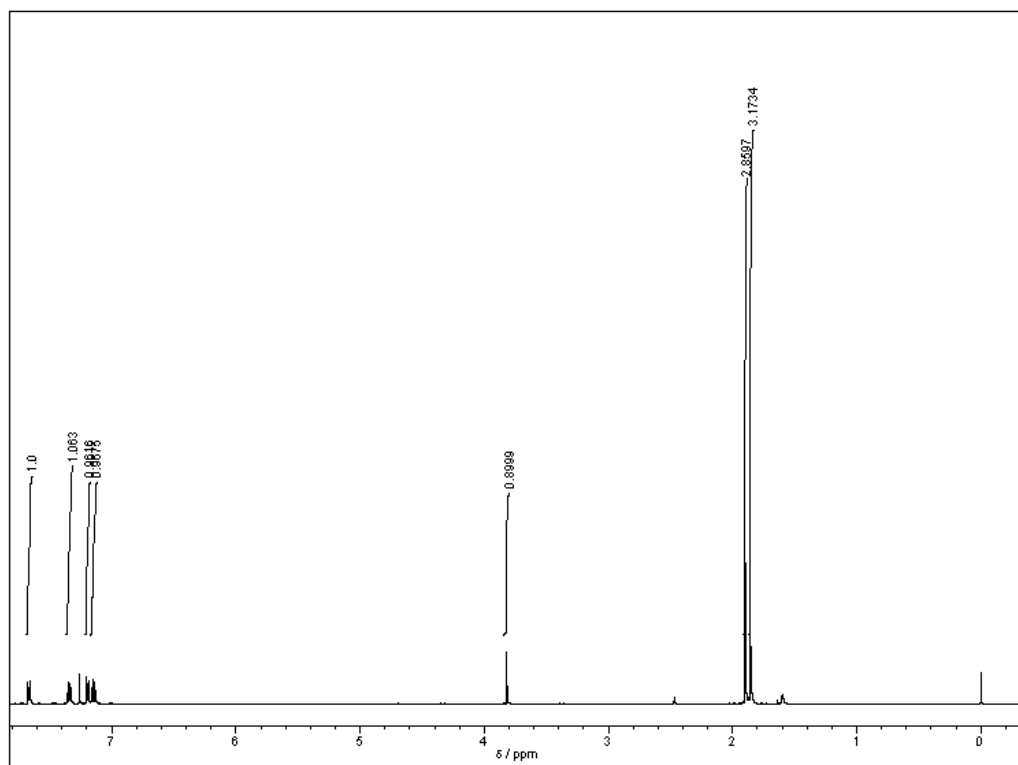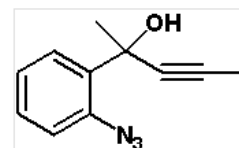

Obs Nuc <sup>1</sup>H  
Obs Freq 500.0 MHz  
Solvent CDCl<sub>3</sub>

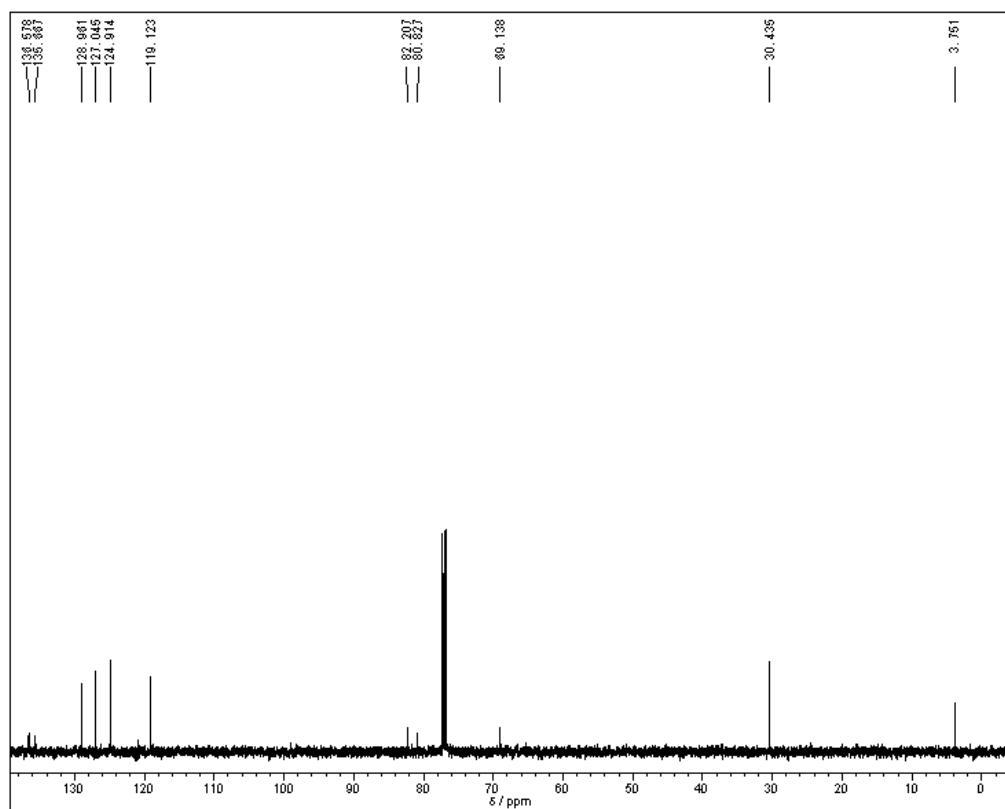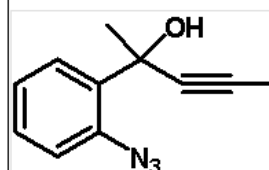

Obs Nuc <sup>13</sup>C  
Obs Freq 125.85 MHz  
Solvent CDCl<sub>3</sub>

8b

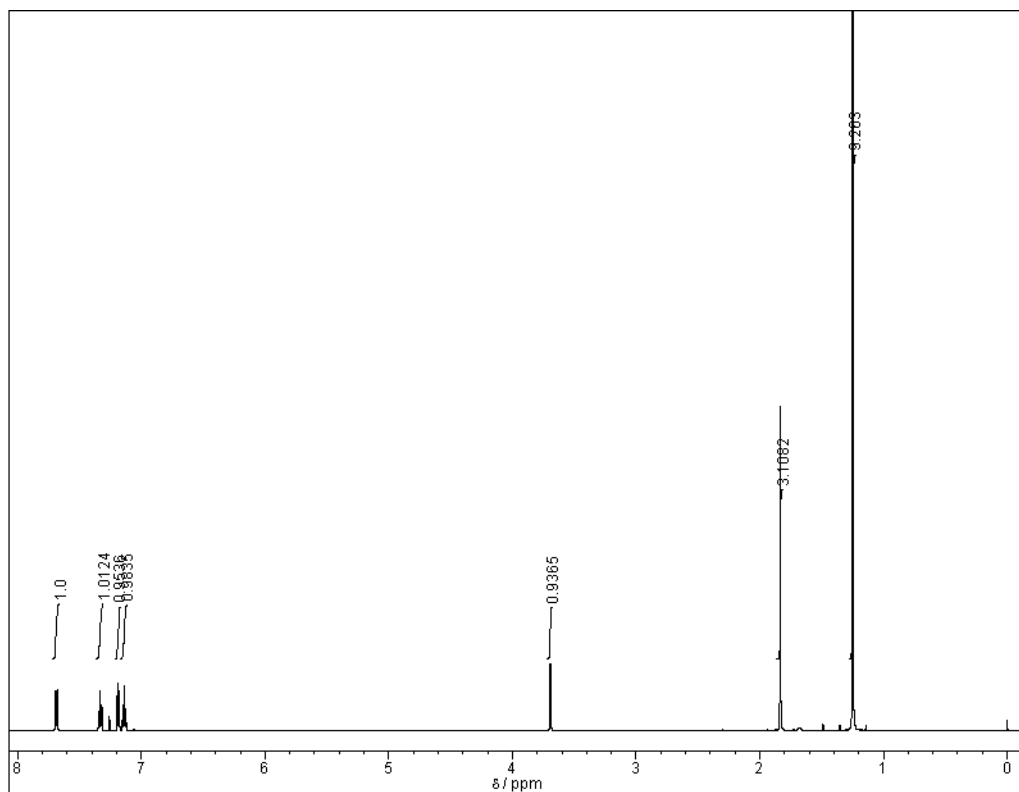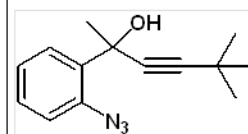

ObsFreq 600.13 MHz  
ObsNuc <sup>1</sup>H  
Solvent CDCl<sub>3</sub>

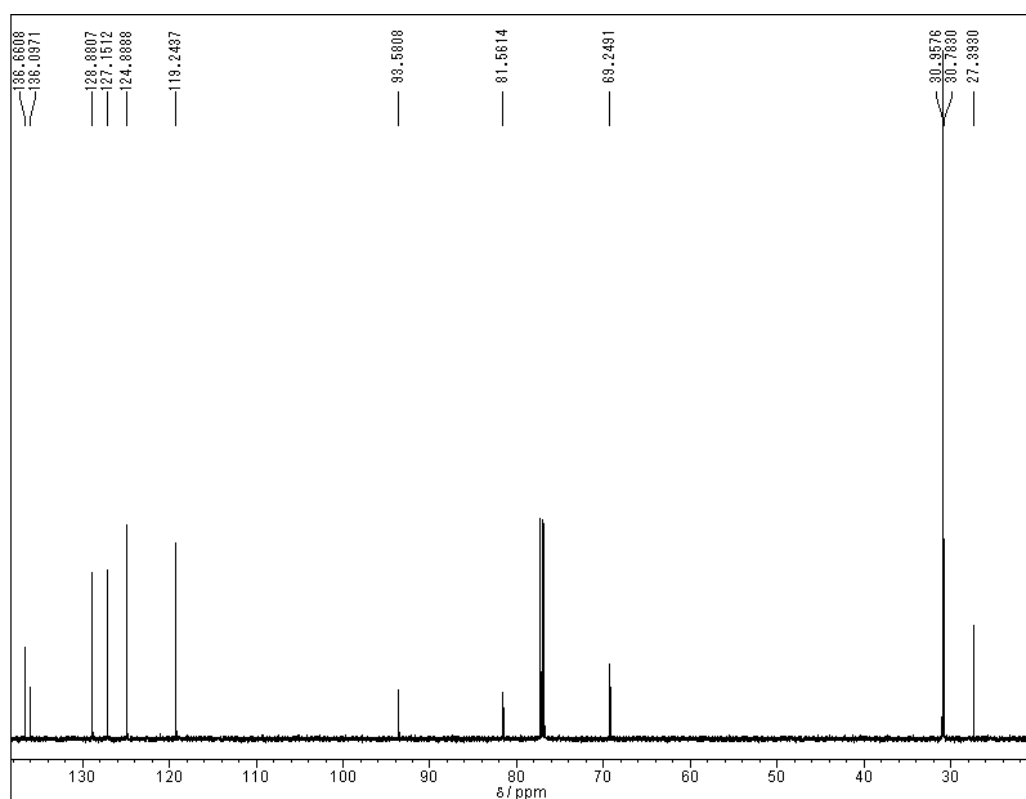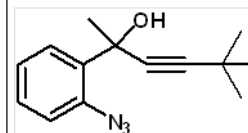

ObsFreq 150.9 MHz  
ObsNuc <sup>13</sup>C  
Solvent CDCl<sub>3</sub>



8c

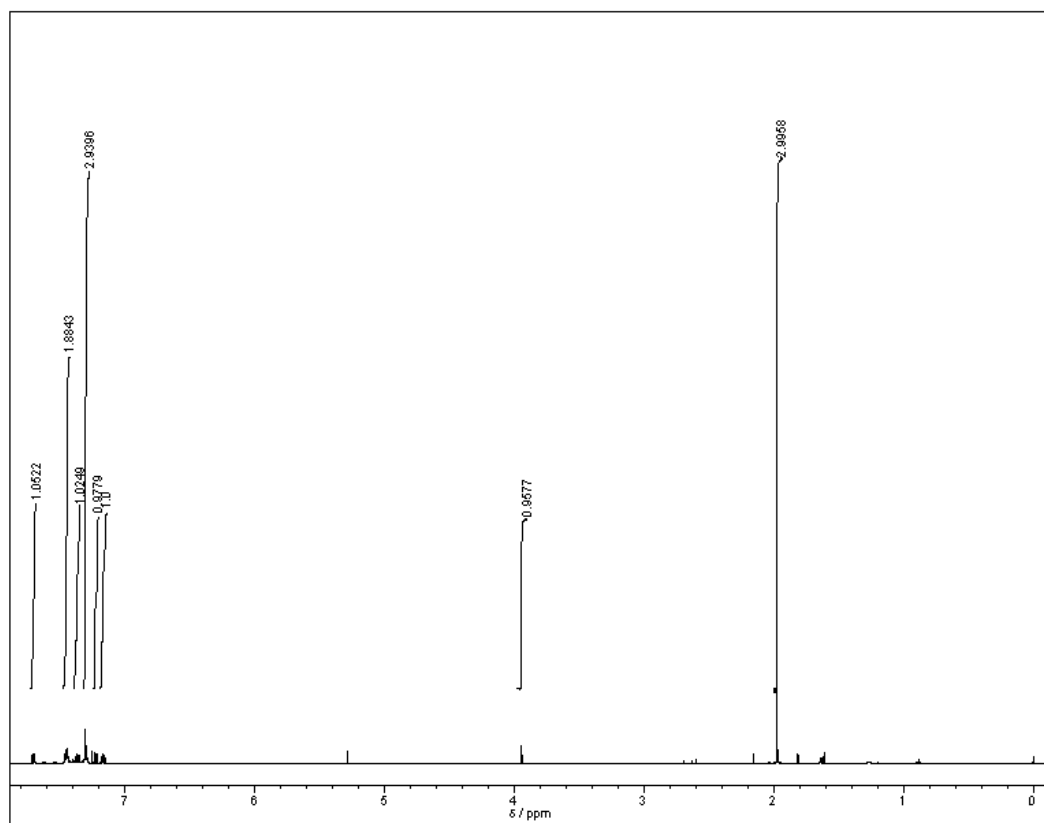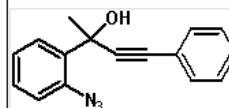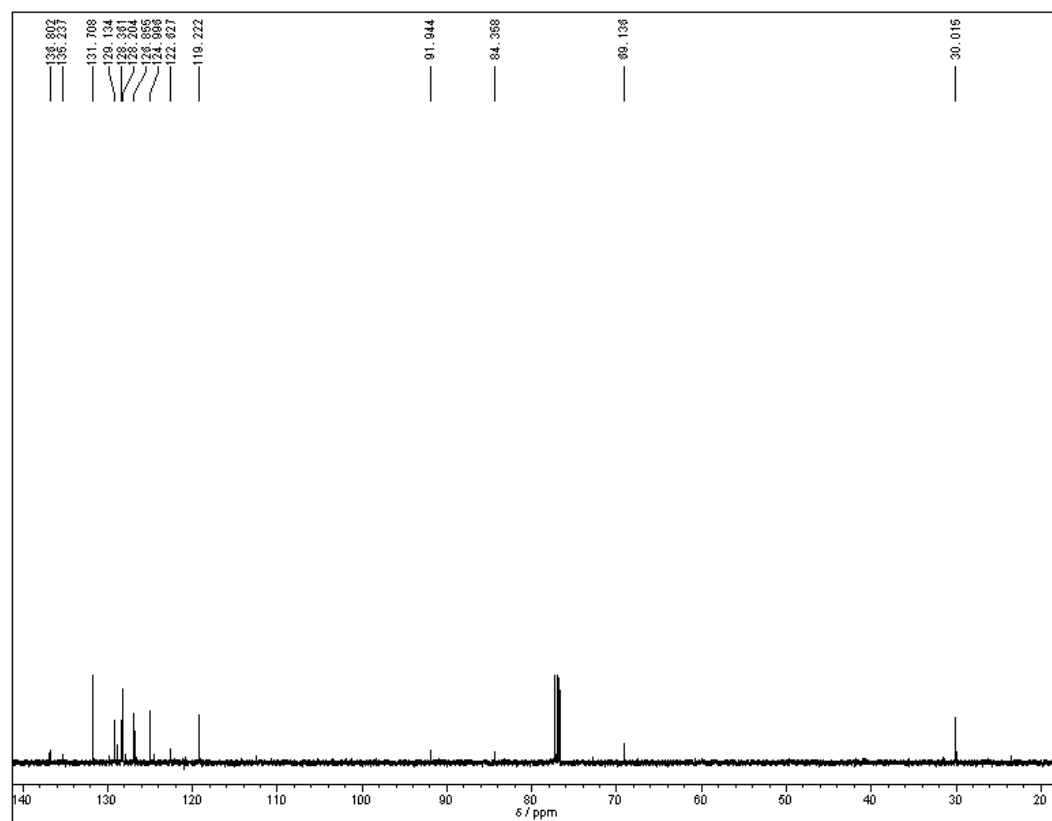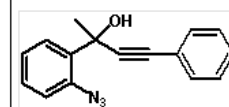

9a

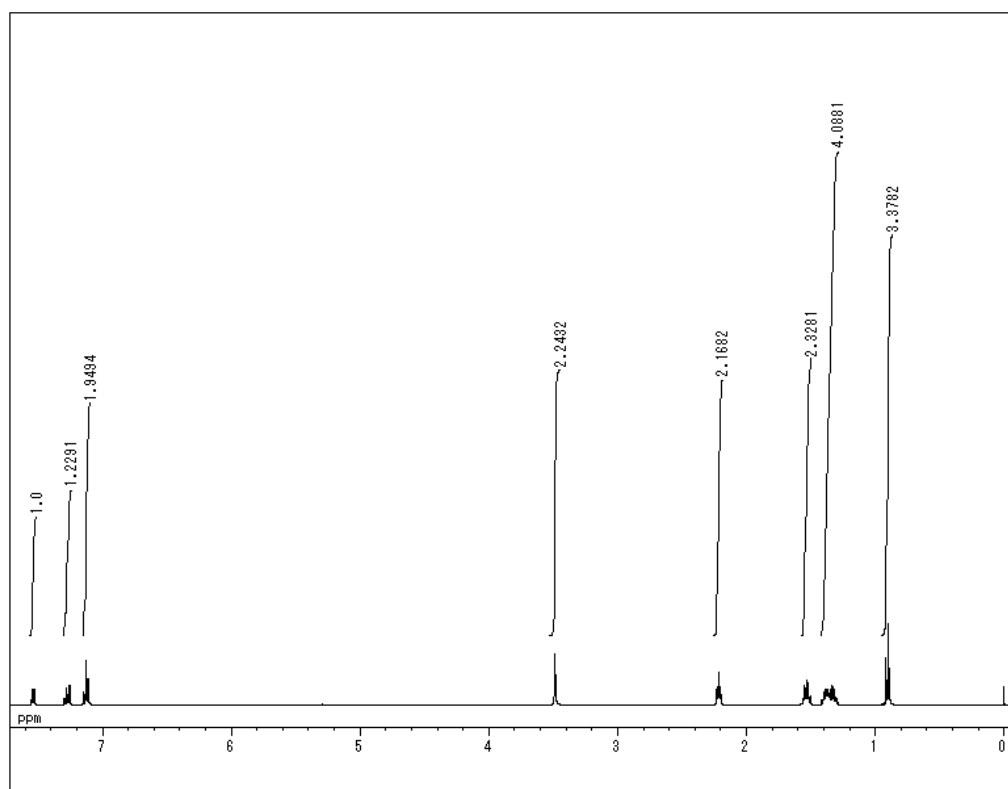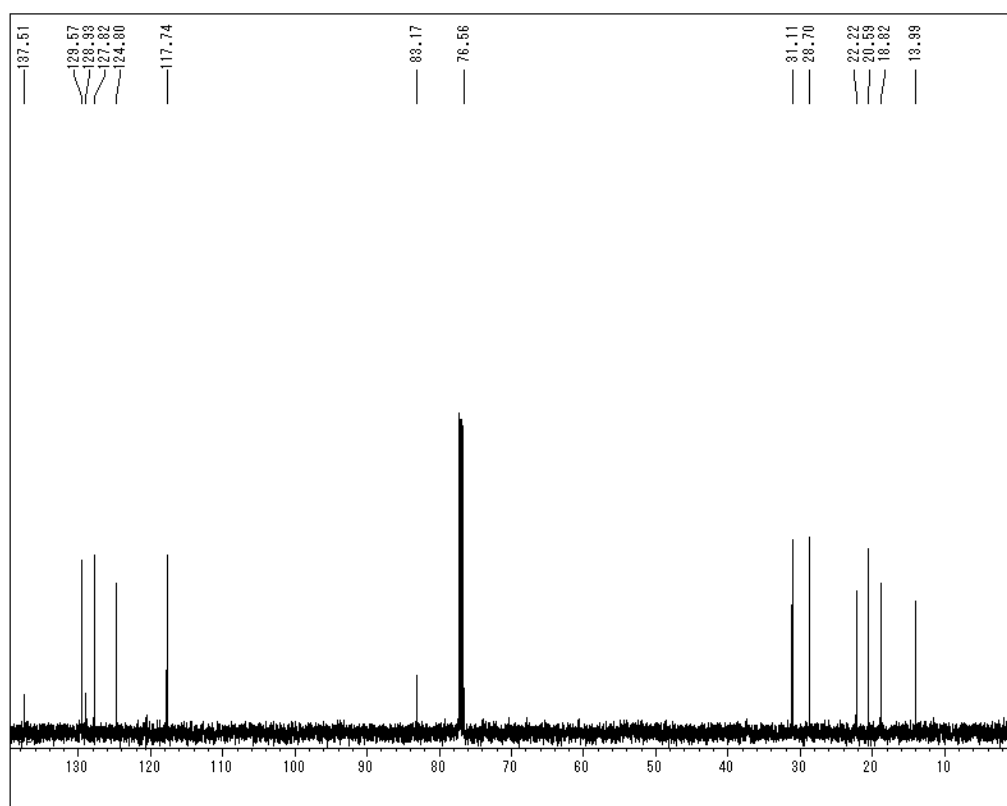

9b

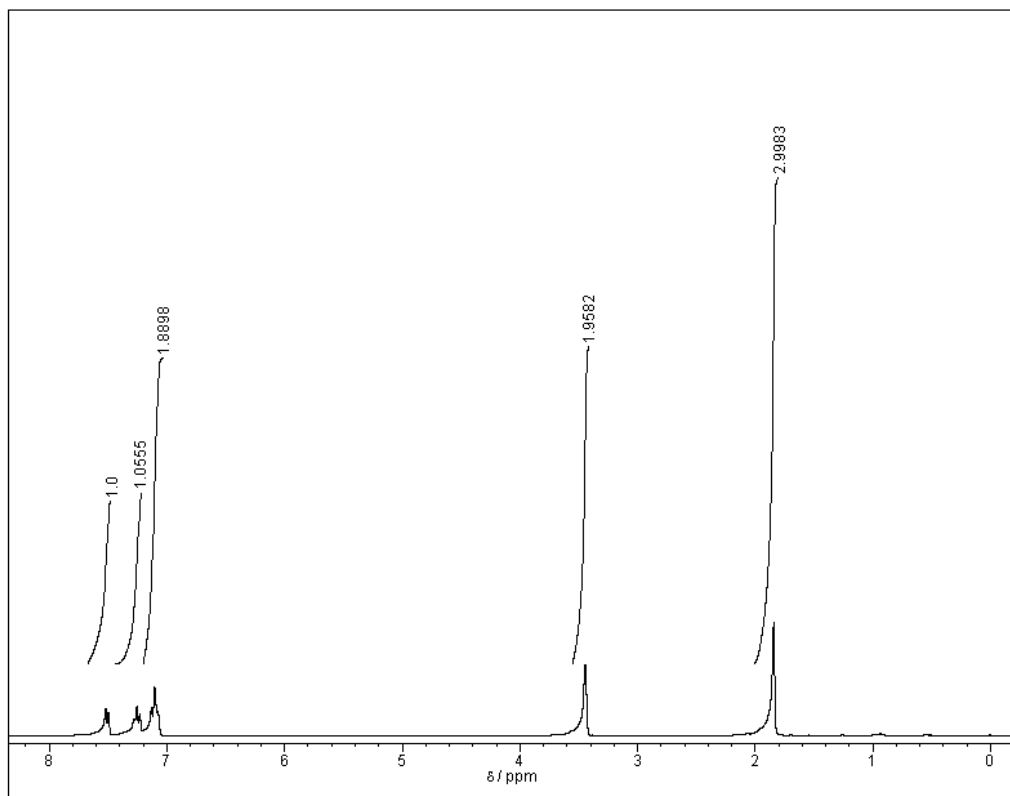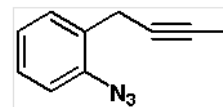

ObsNuc <sup>1</sup>H  
ObsFreq 300.01 MHz  
Solvent CDCl<sub>3</sub>

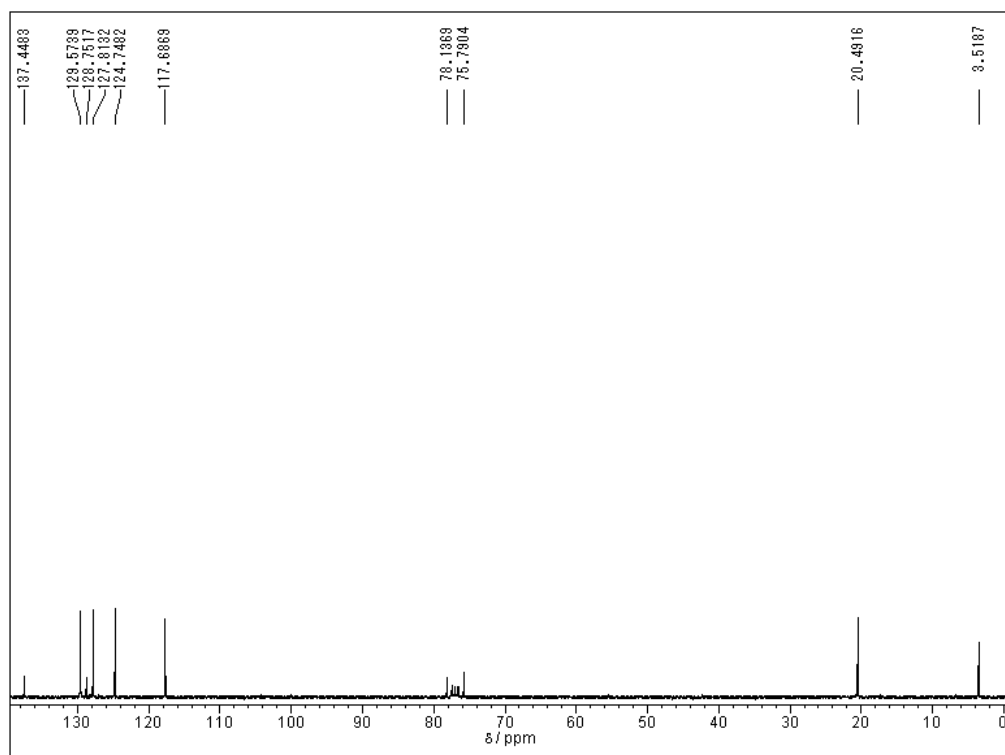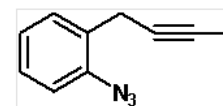

ObsNuc <sup>13</sup>C  
ObsFreq 75.44 MHz  
Solvent CDCl<sub>3</sub>

9c

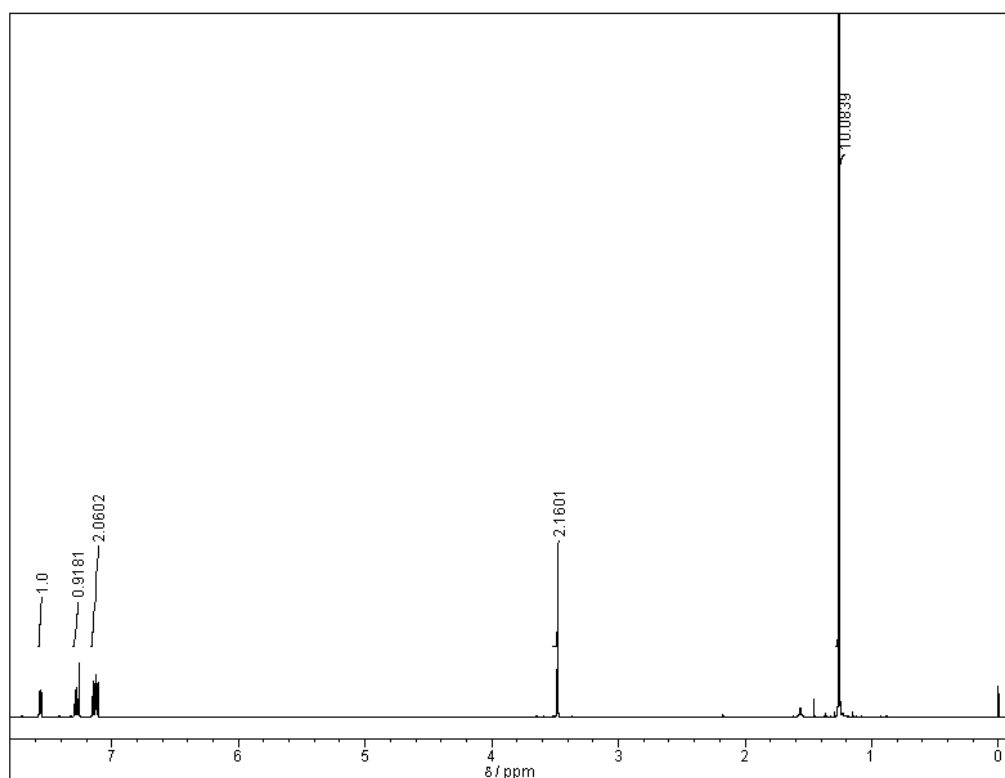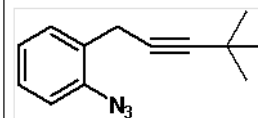

ObsNuc <sup>1</sup>H  
ObsFreq 600.13 MHz  
Solvent CDCl<sub>3</sub>

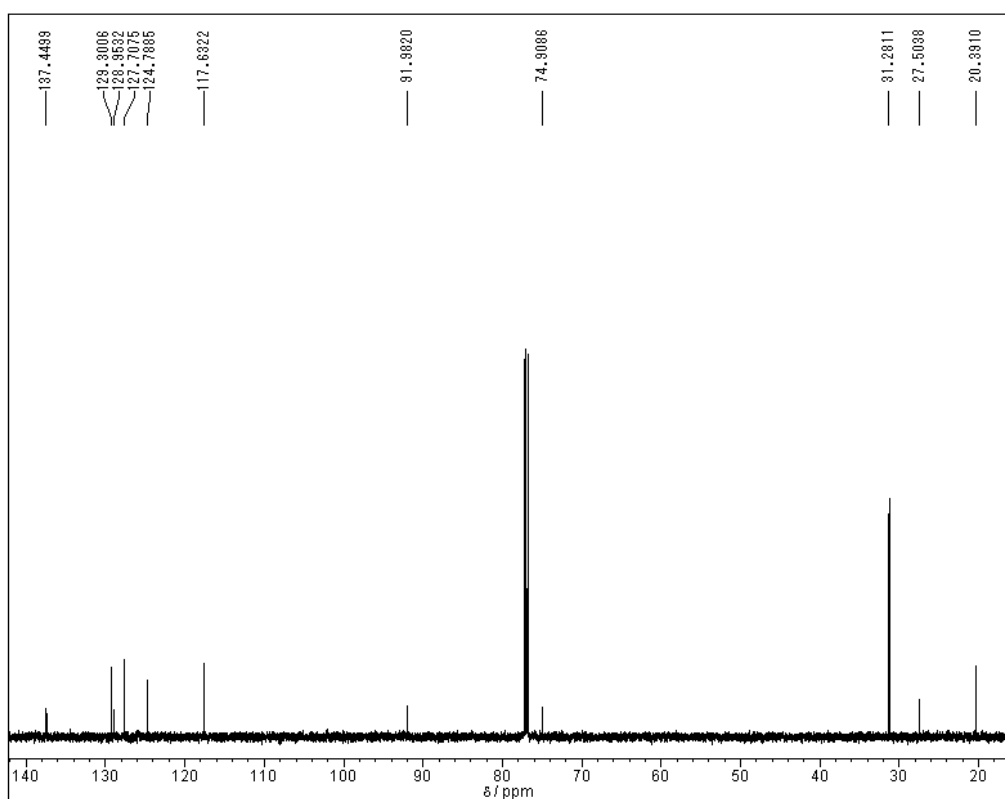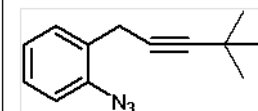

ObsNuc <sup>13</sup>C  
ObsFreq 150.9 MHz  
Solvent CDCl<sub>3</sub>

9d

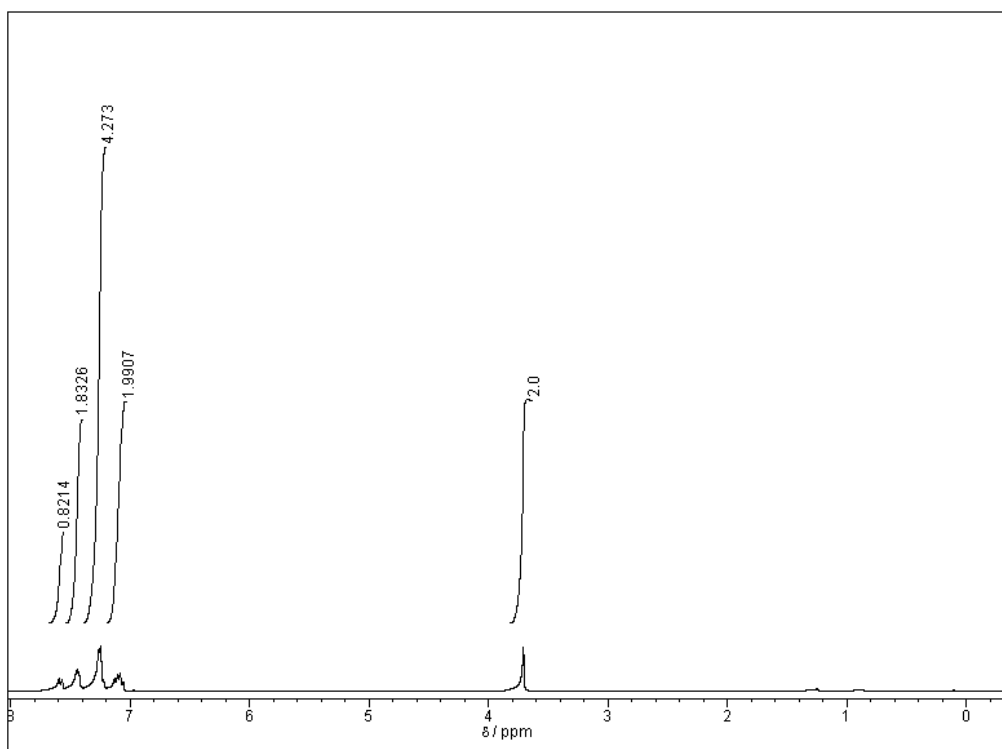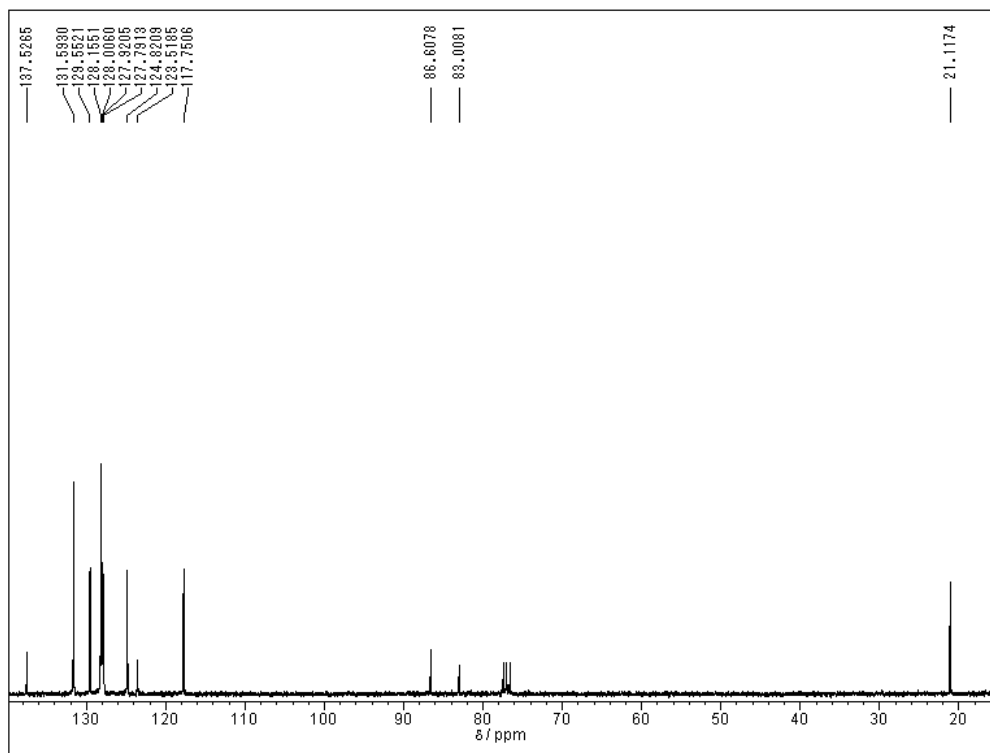

9e

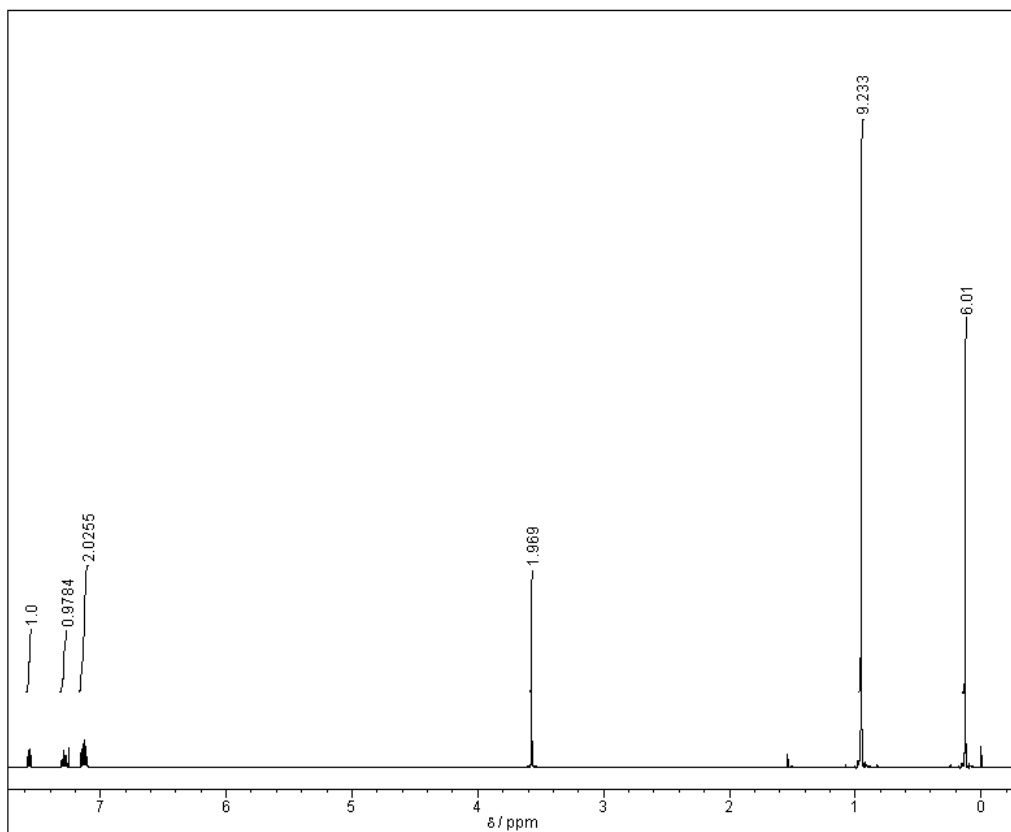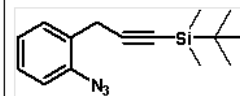

ObsNuc <sup>1</sup>H  
ObsFreq 500.0 MHz  
Solvent CDCl<sub>3</sub>

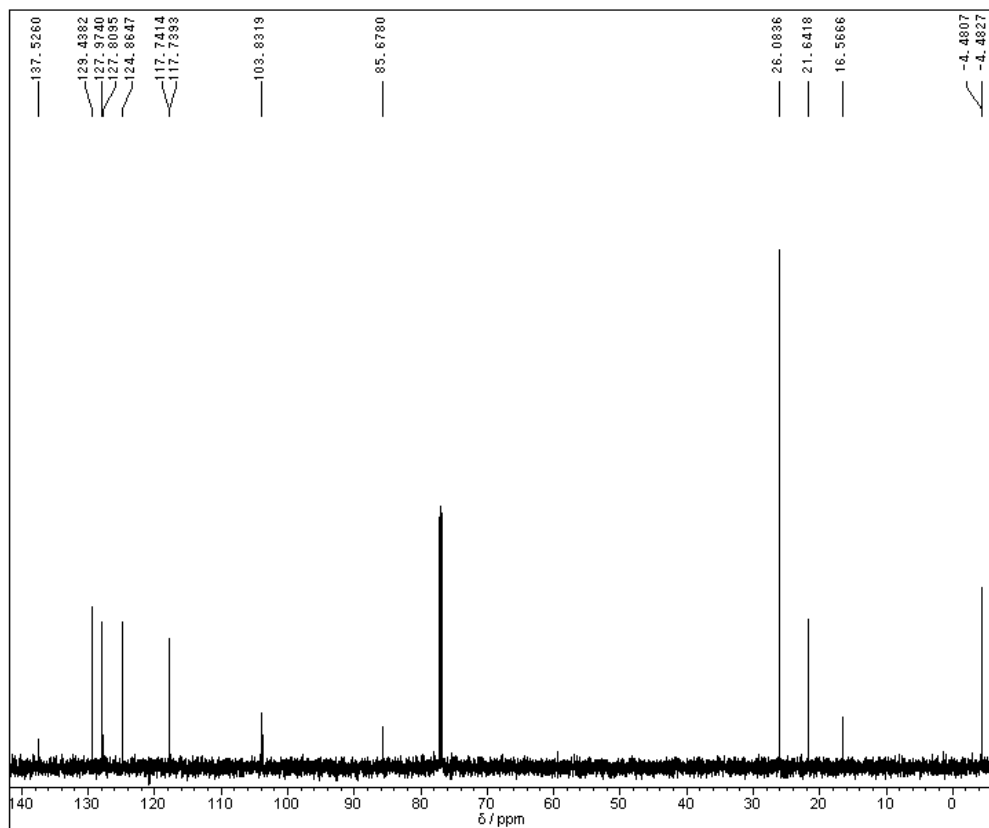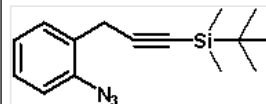

ObsNuc <sup>13</sup>C  
ObsFreq 125.65 MHz  
Solvent CDCl<sub>3</sub>

9f

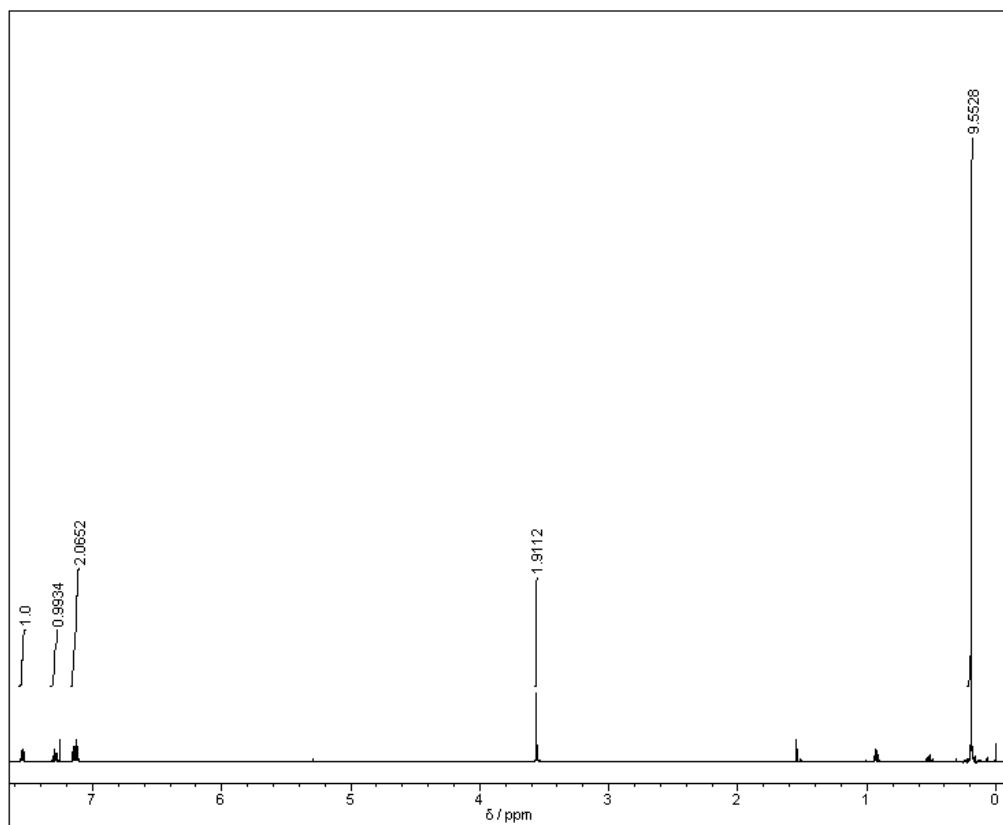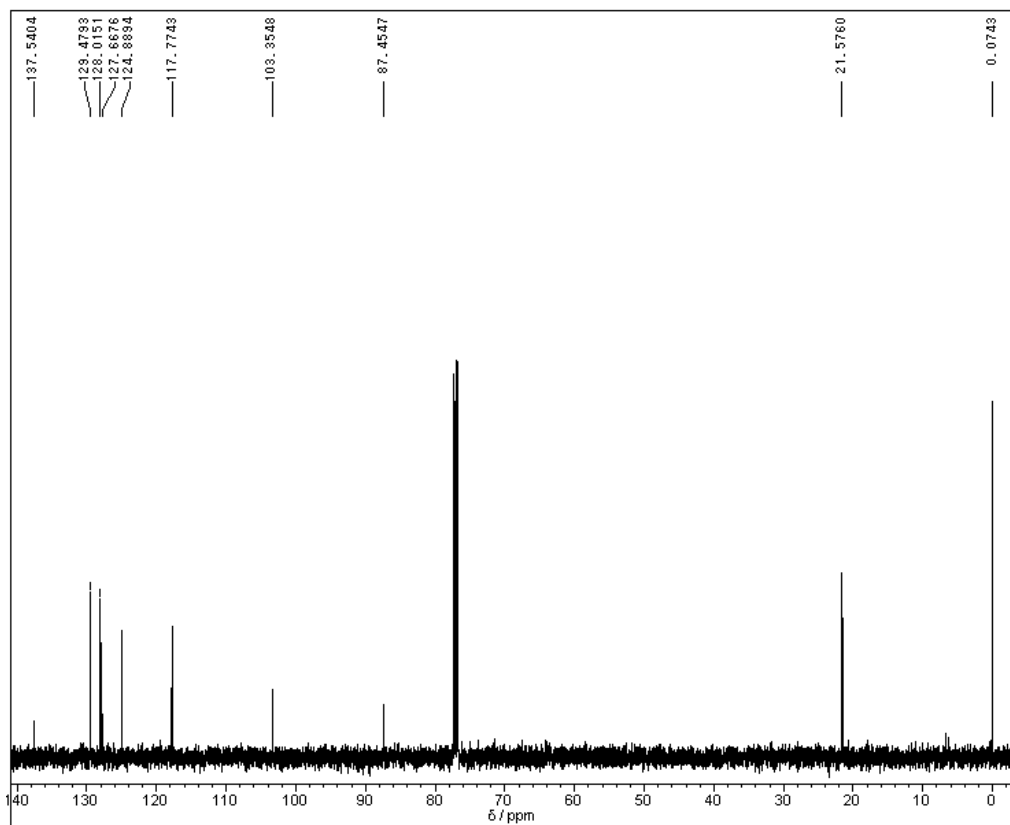

9g

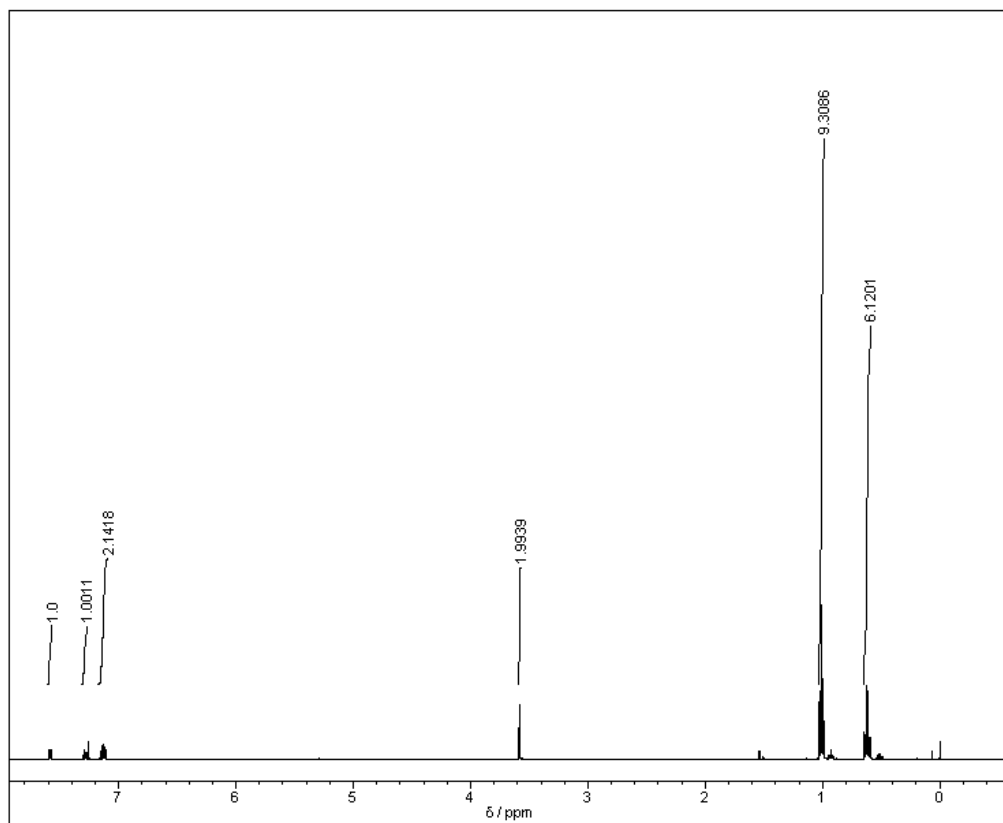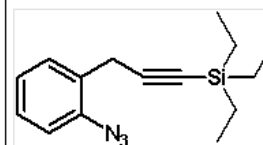

ObsNuc 1H  
ObsFreq 500.0 MHz  
Solvent CDCl<sub>3</sub>

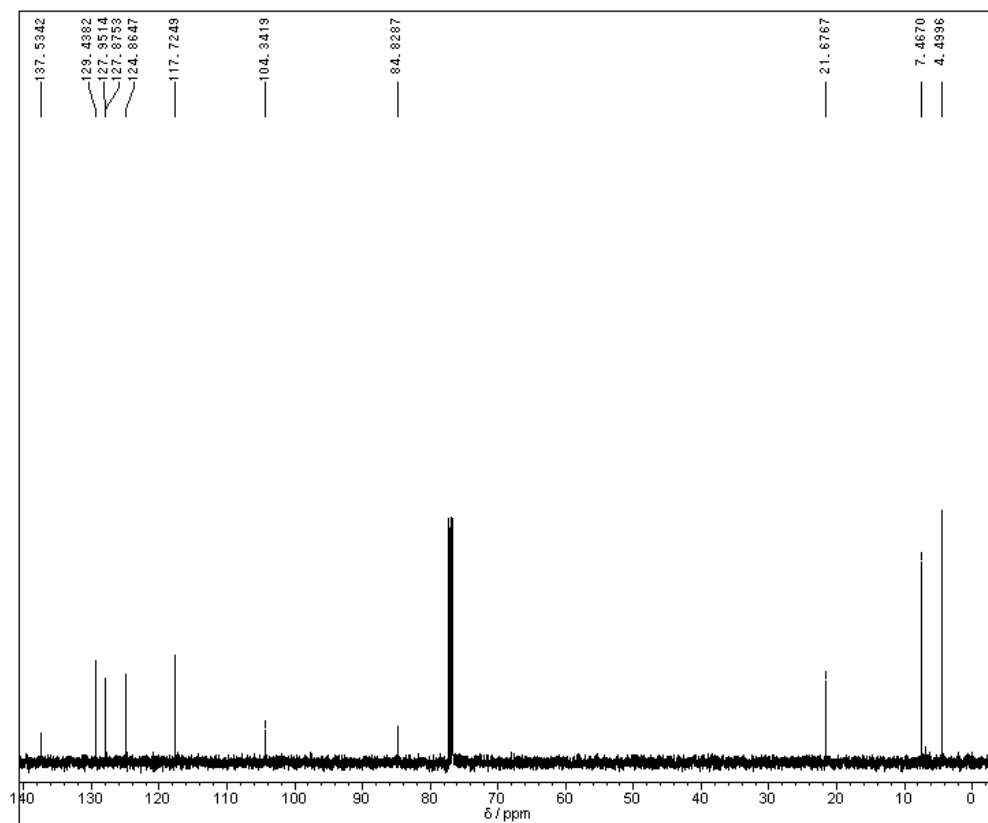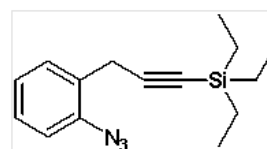

ObsNuc 13C  
ObsFreq 125.65 MHz  
Solvent CDCl<sub>3</sub>



10a

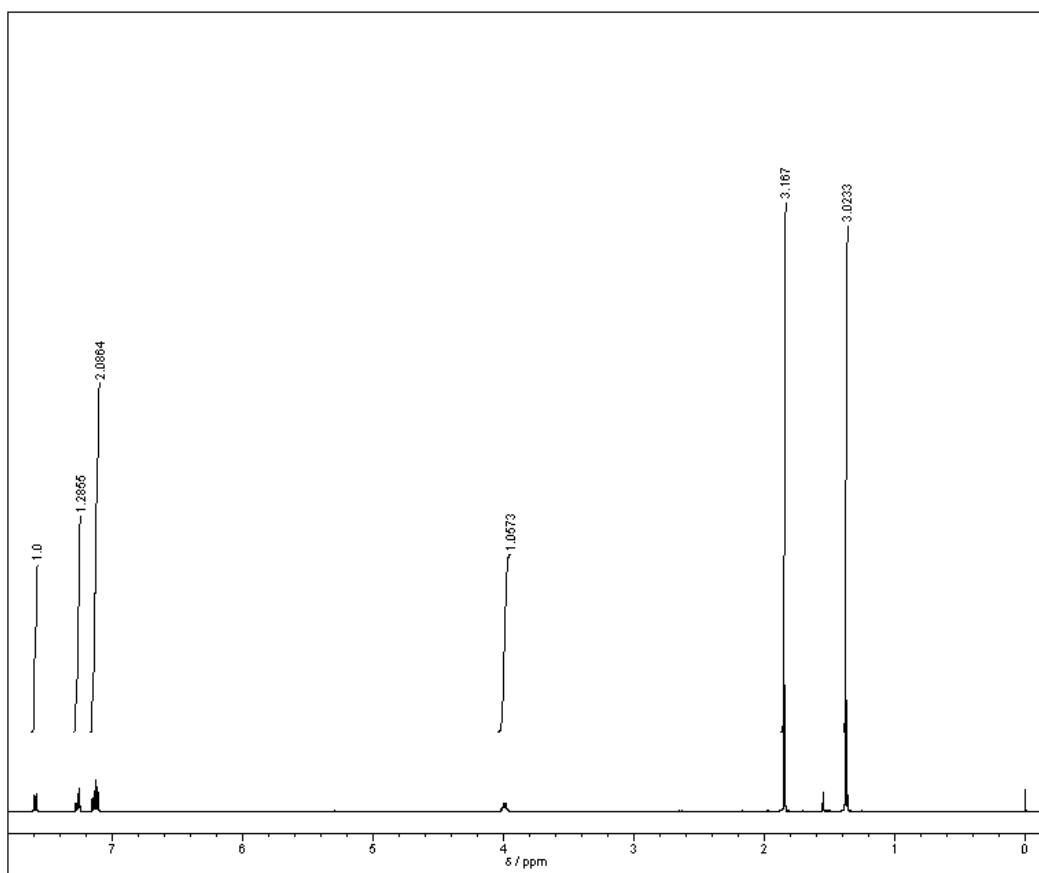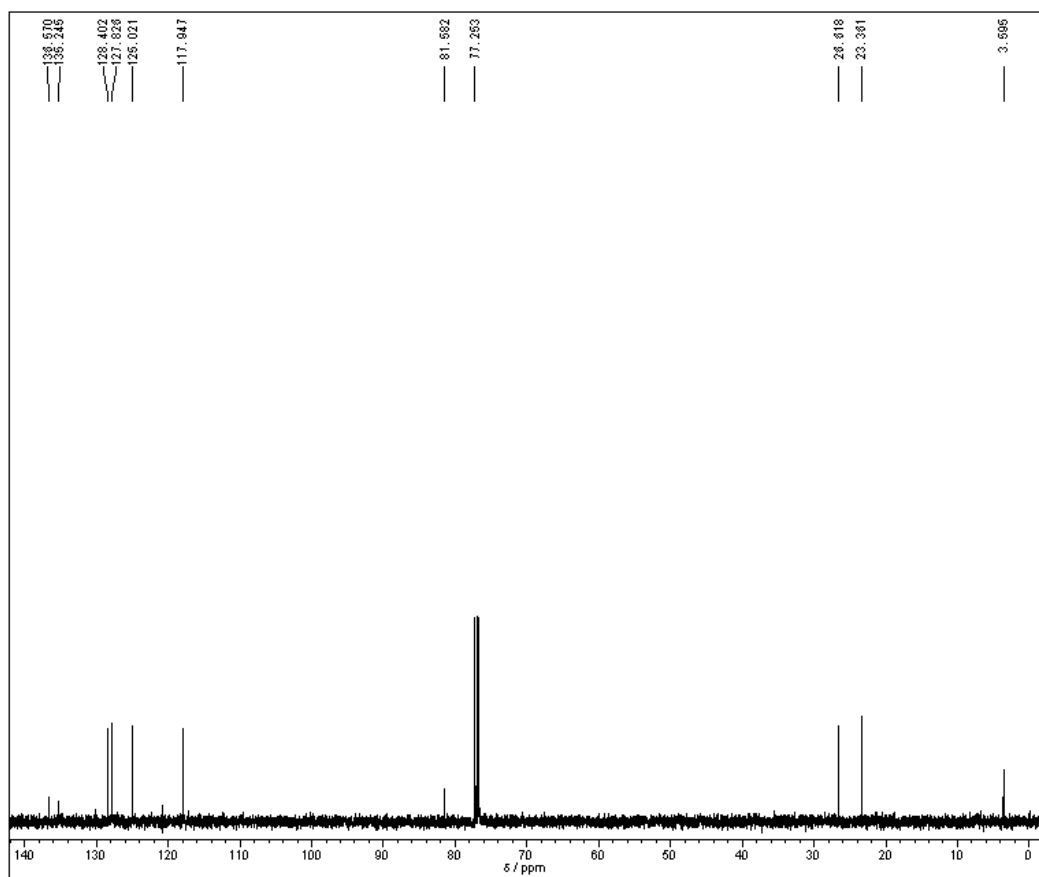

10b

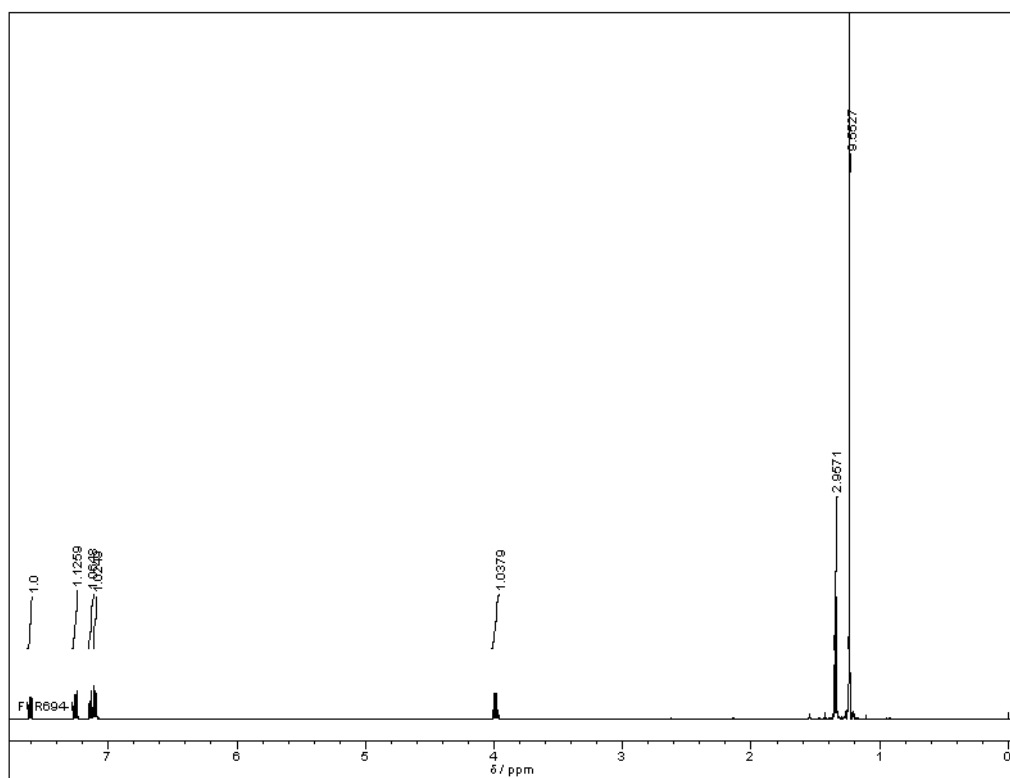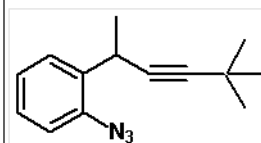

ObsNuc <sup>1</sup>H  
ObsFreq 500.0 MHz  
Solvent CDCl<sub>3</sub>

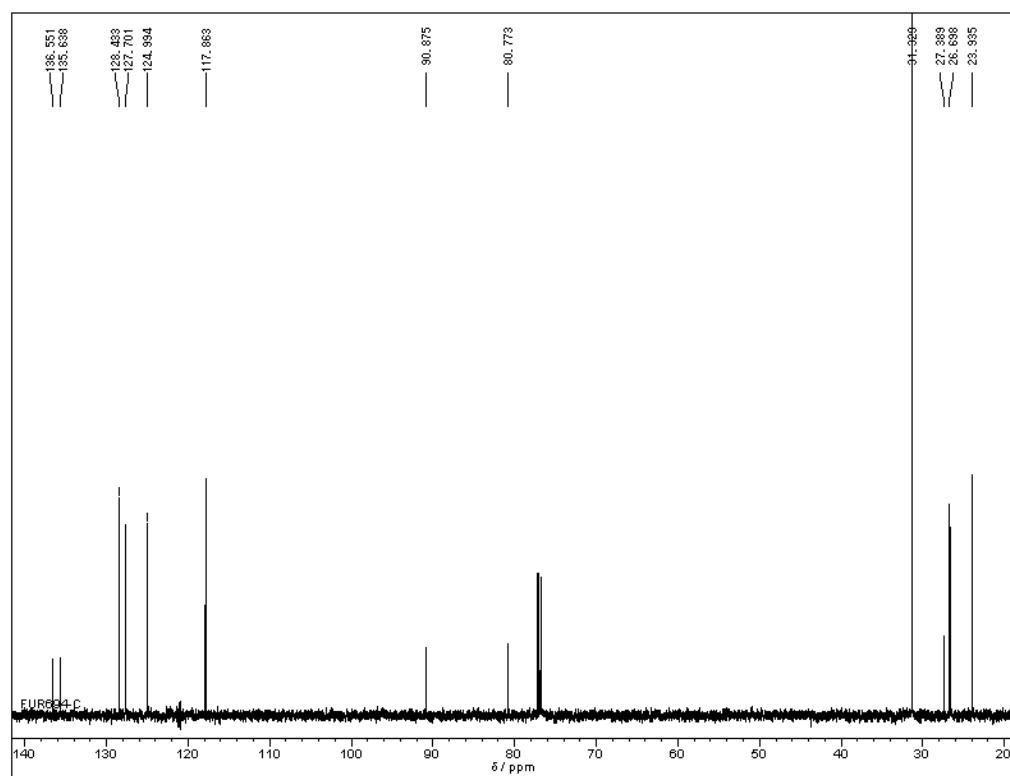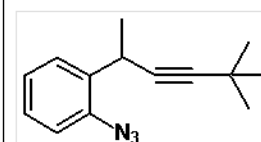

ObsNuc <sup>13</sup>C  
ObsFreq 125.65 MHz  
Solvent CDCl<sub>3</sub>

10c

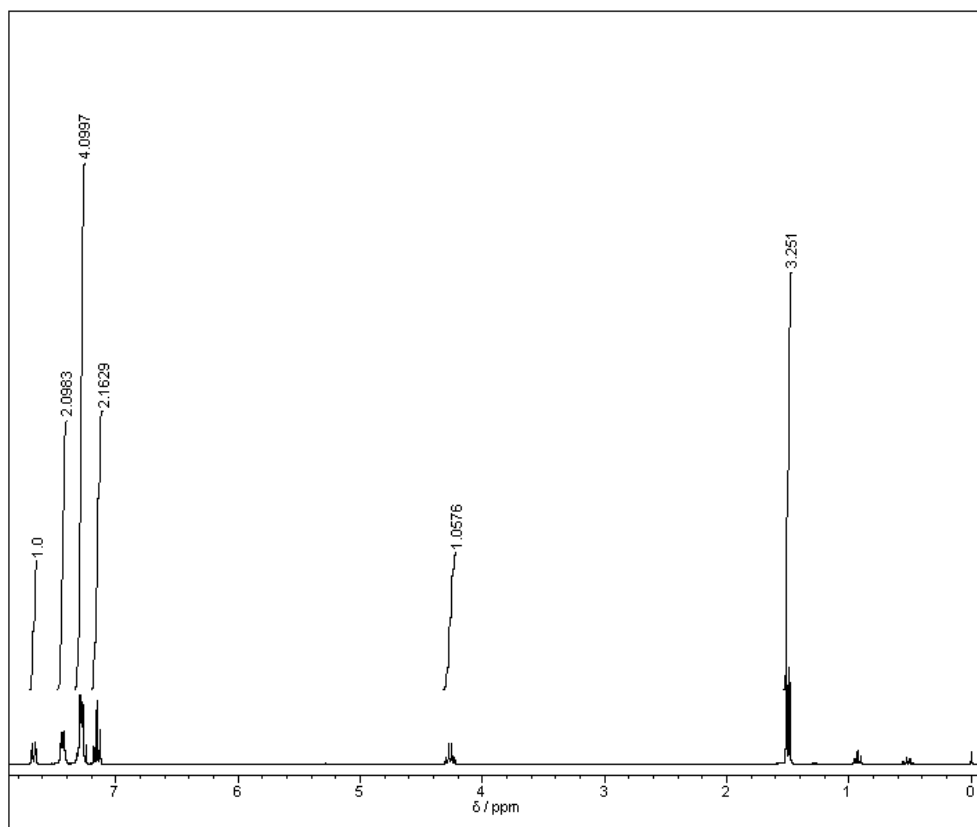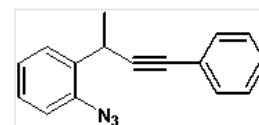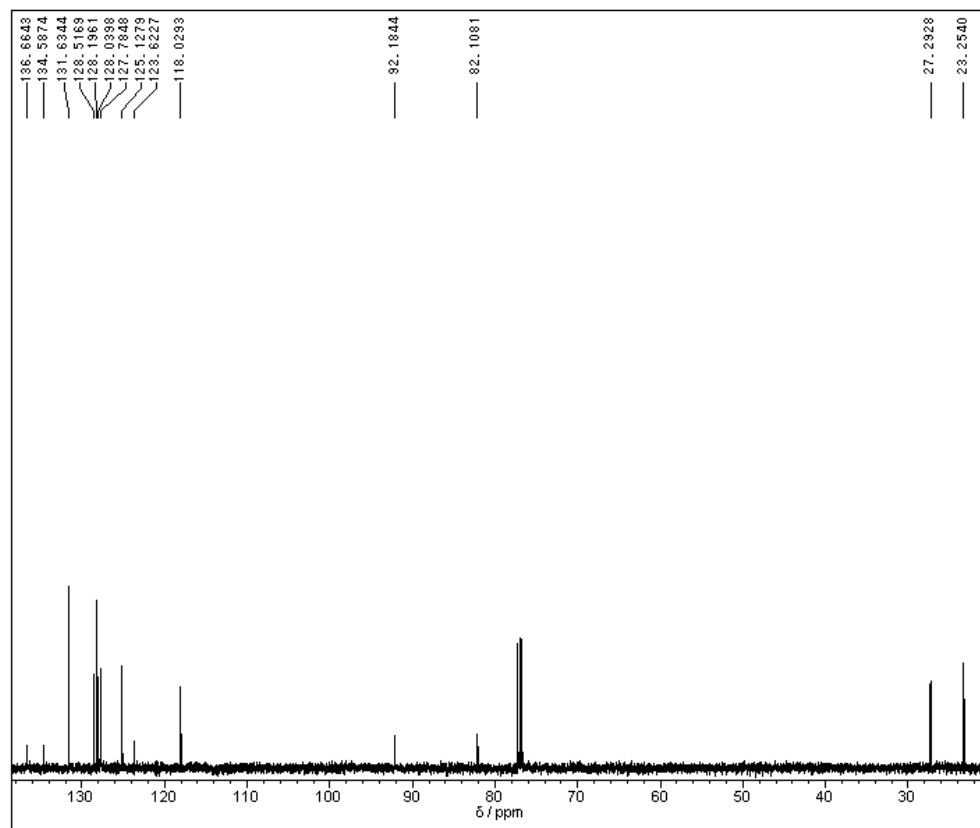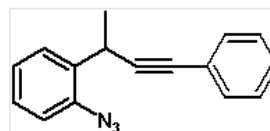

10d

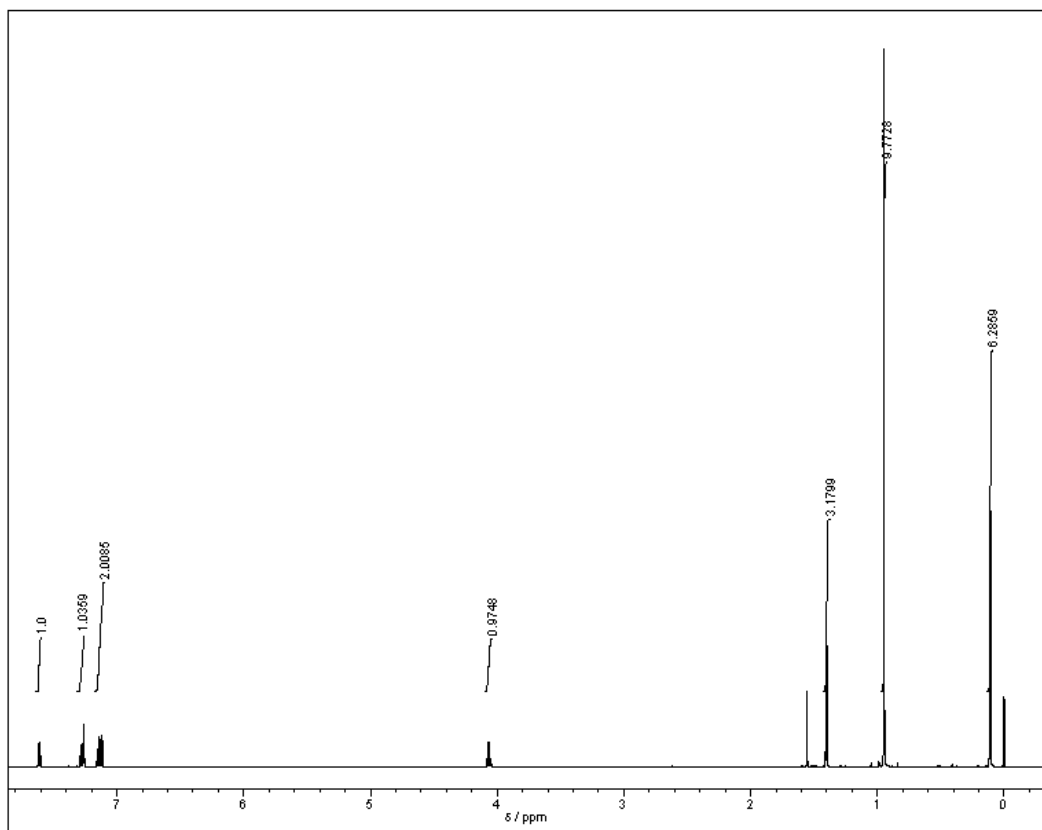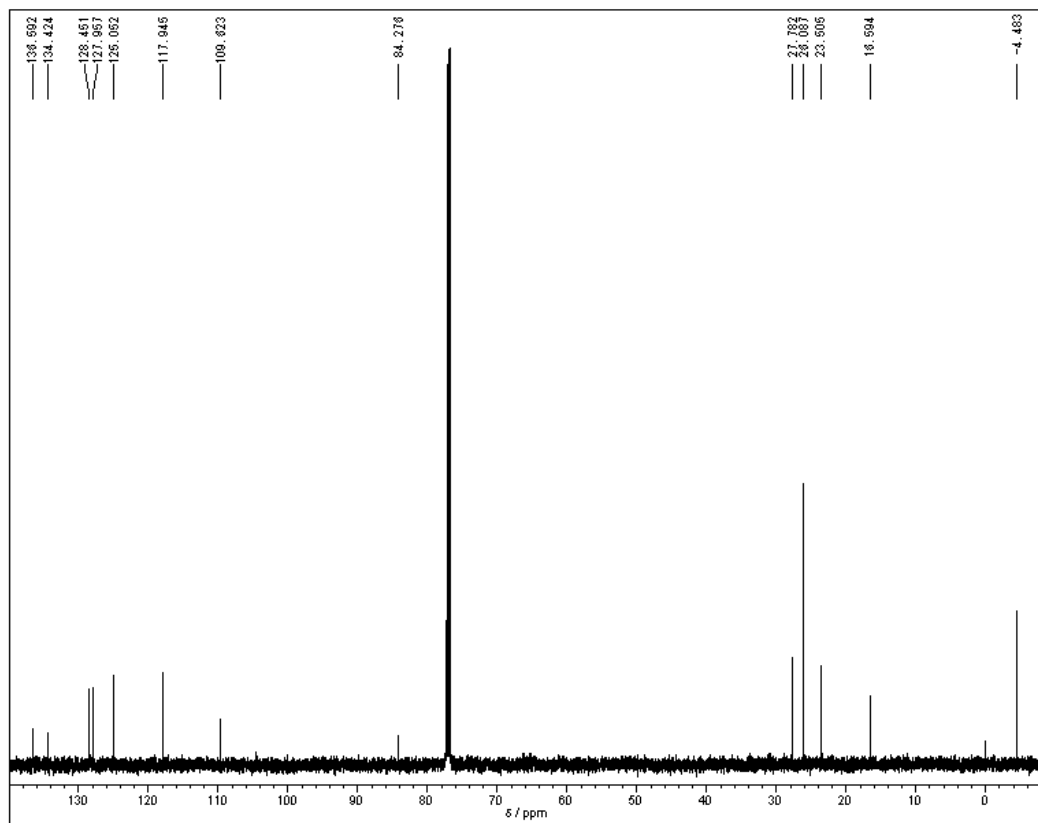

11a

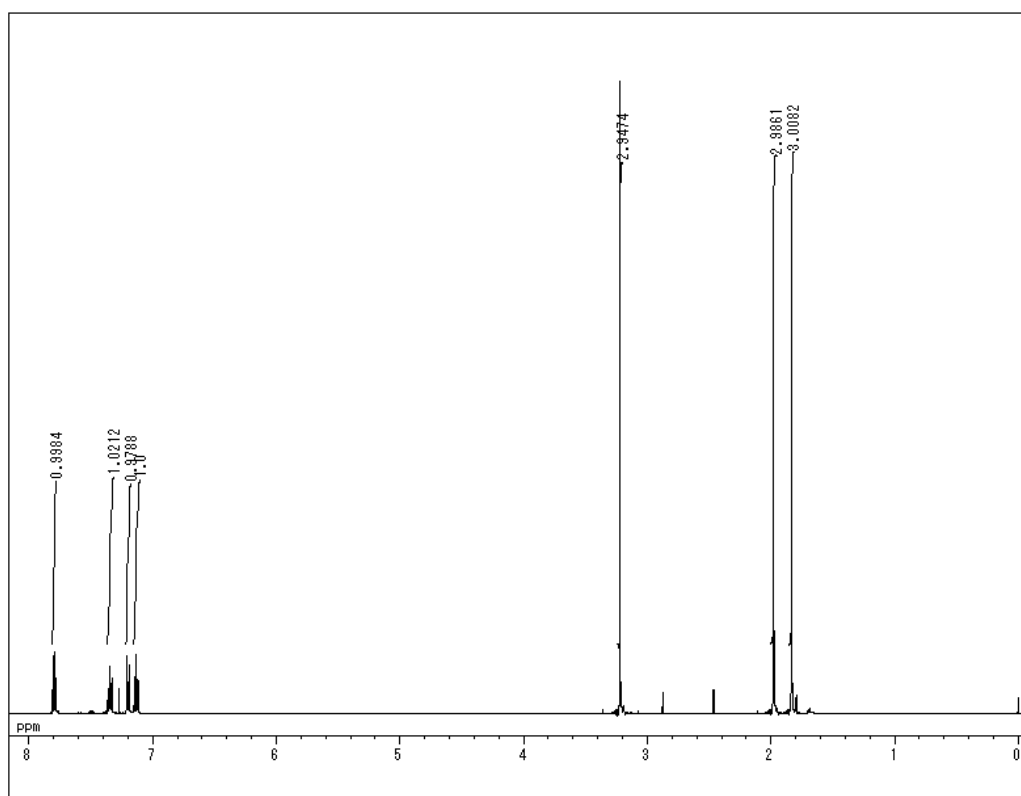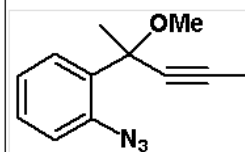

ObsNuc <sup>1</sup>H  
ObsFreq 500.0 MHz  
Solvent CDCl<sub>3</sub>

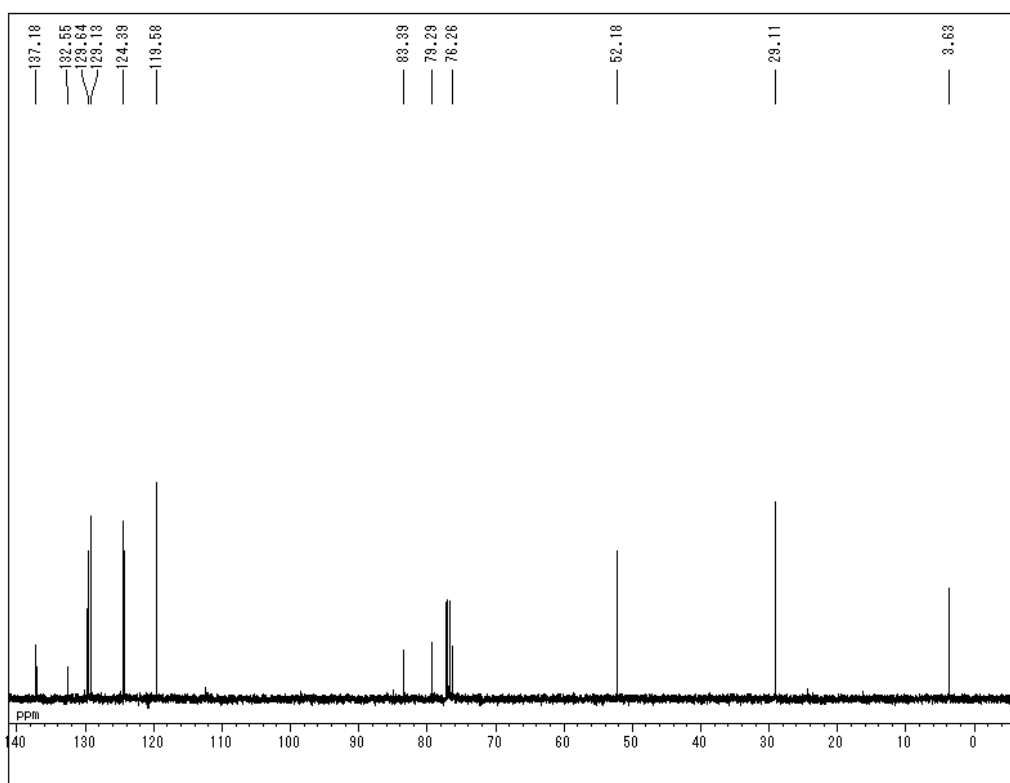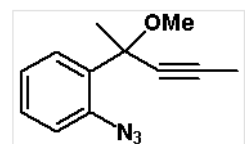

ObsNuc <sup>13</sup>C  
ObsFreq 125.65 MHz  
Solvent CDCl<sub>3</sub>

11b

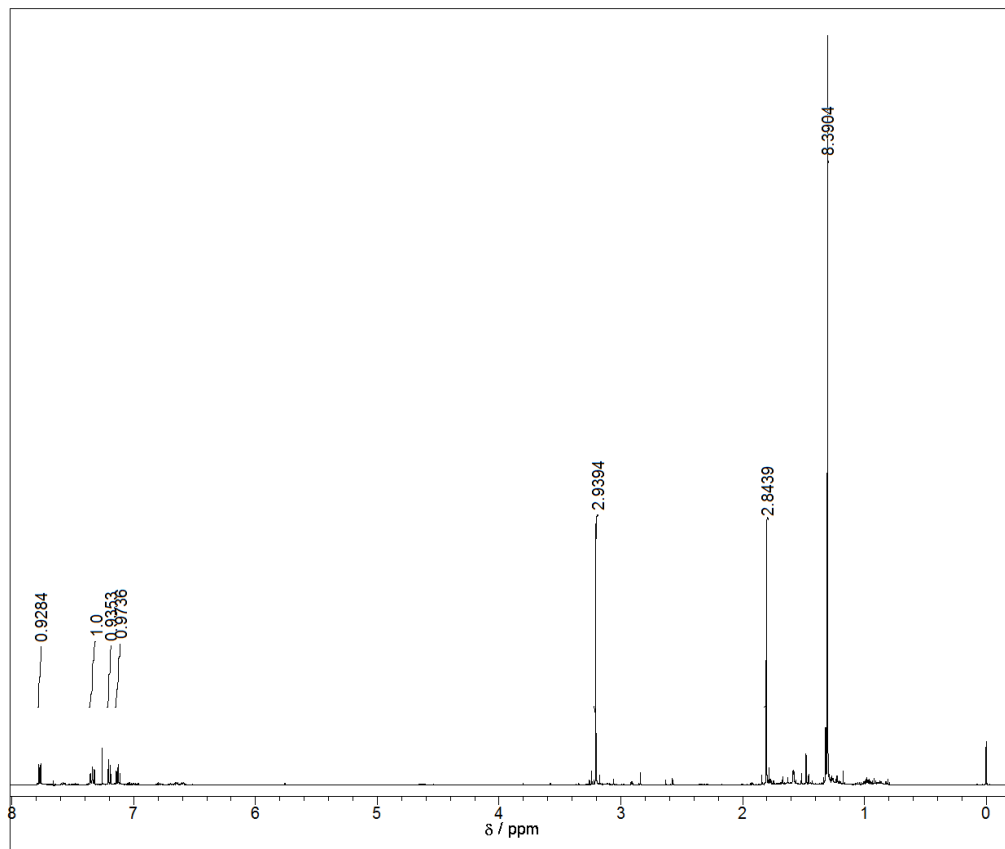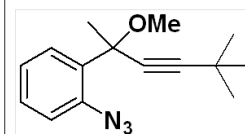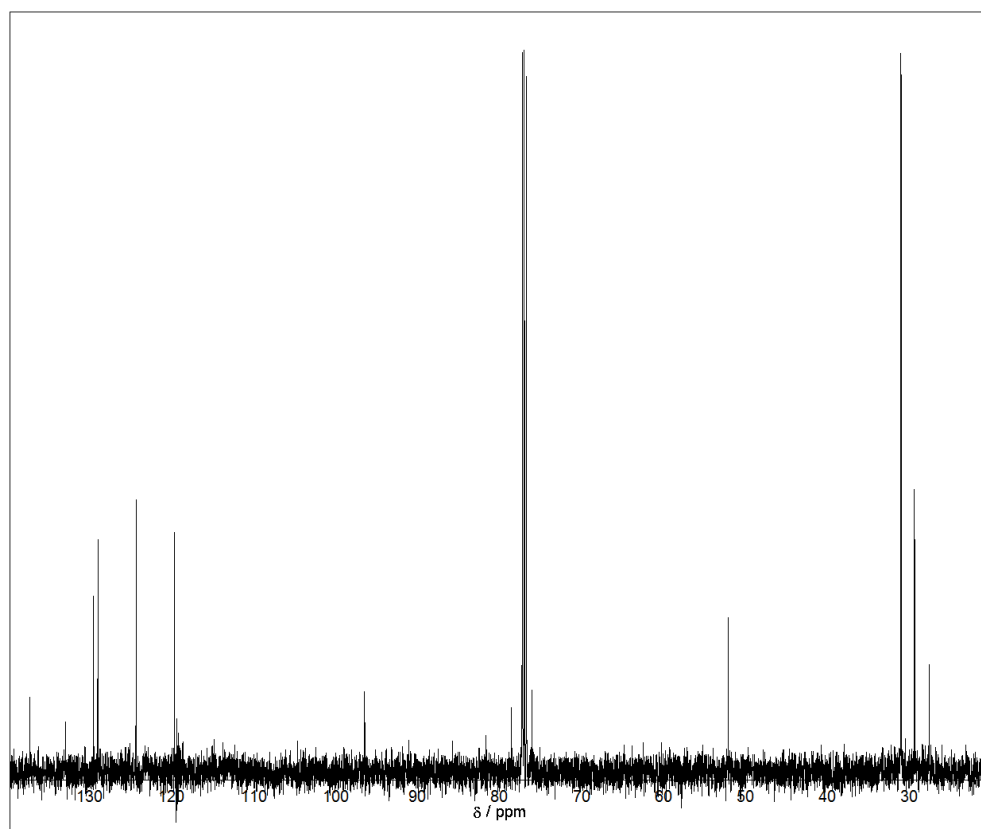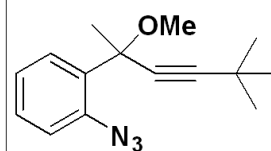

12a

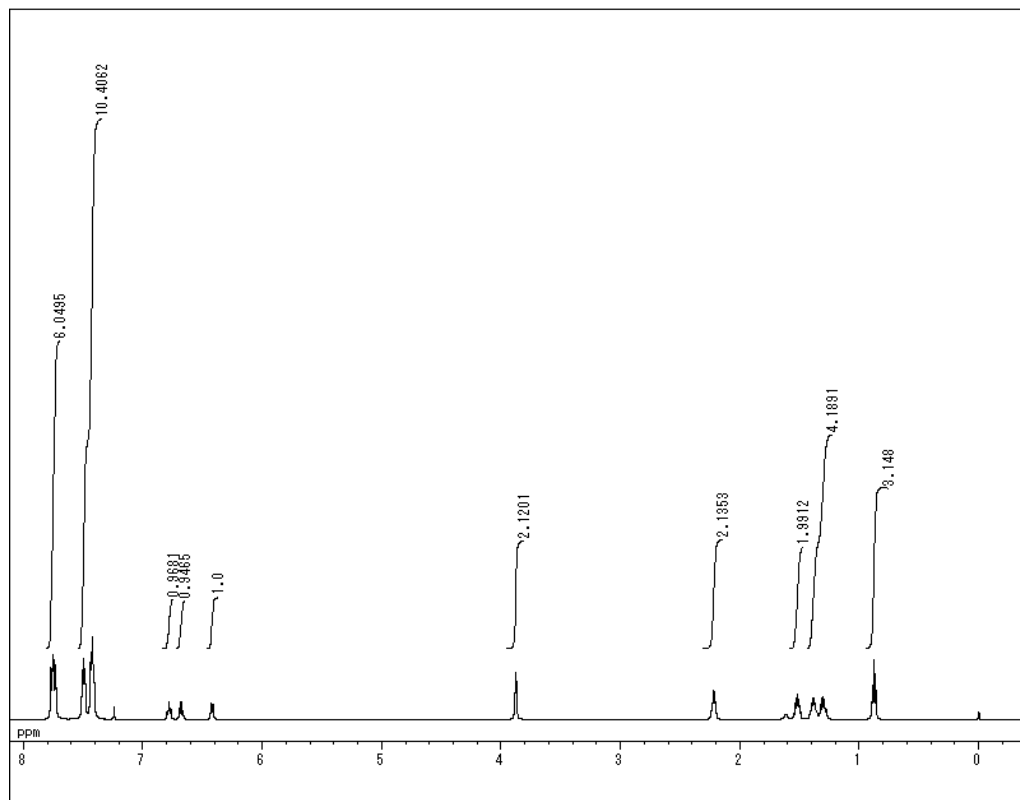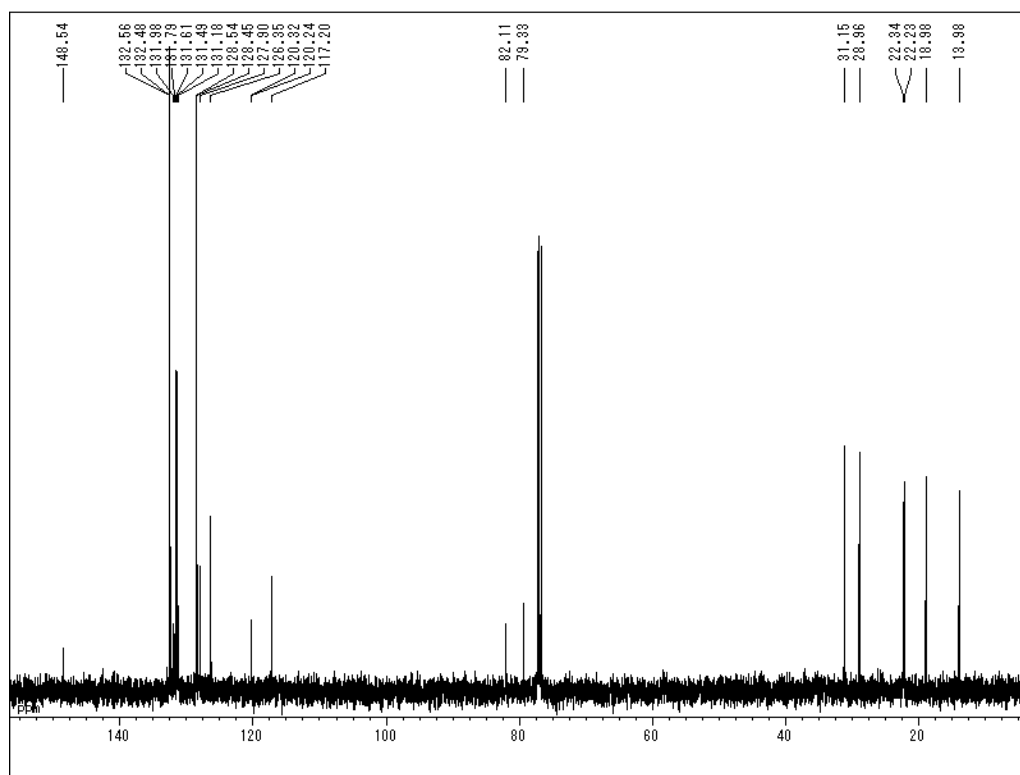

12b

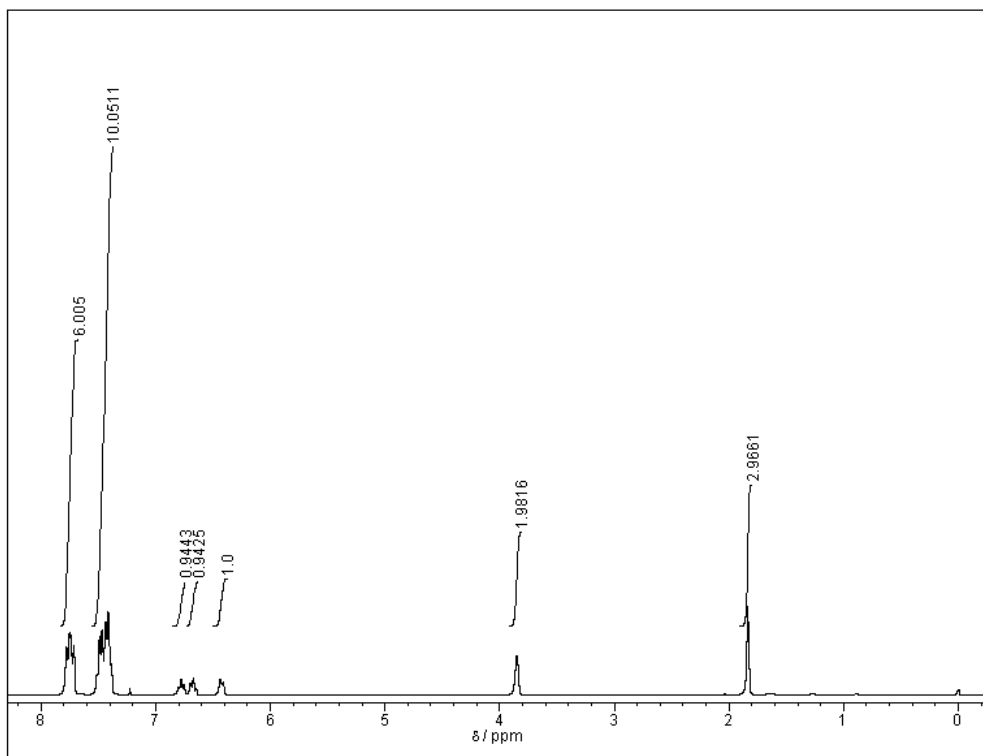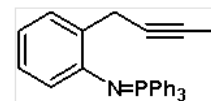

ObsNuc <sup>1</sup>H  
ObsFreq 300.01 MHz  
Solvent CDCl<sub>3</sub>

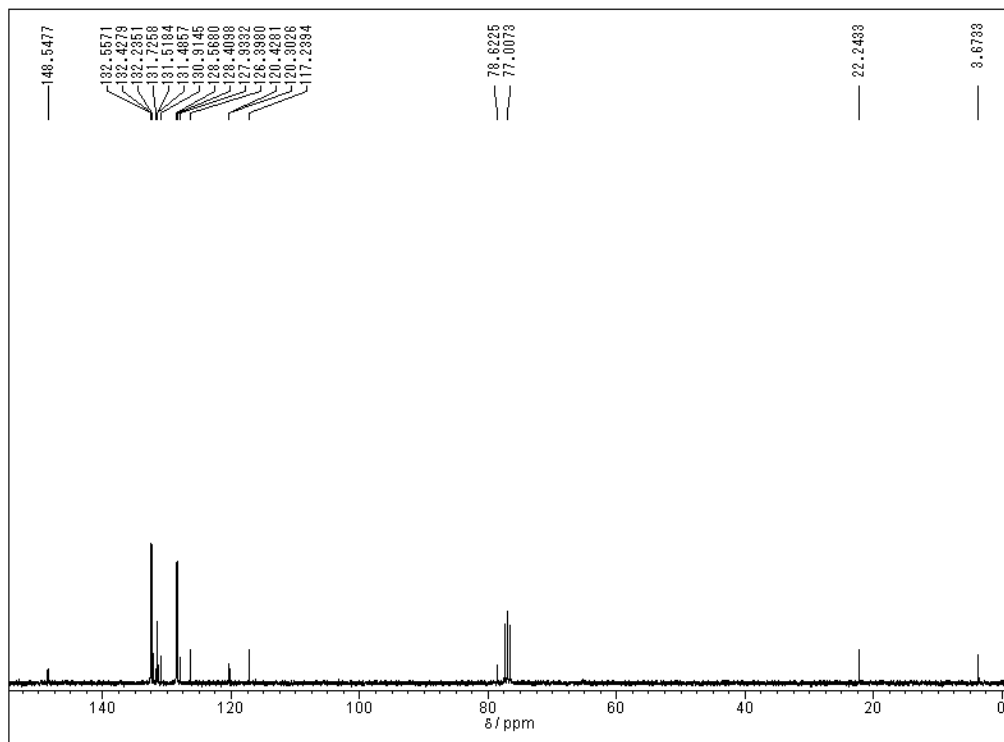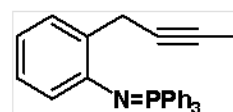

ObsNuc <sup>13</sup>C  
ObsFreq 75.44 MHz  
Solvent CDCl<sub>3</sub>



12c

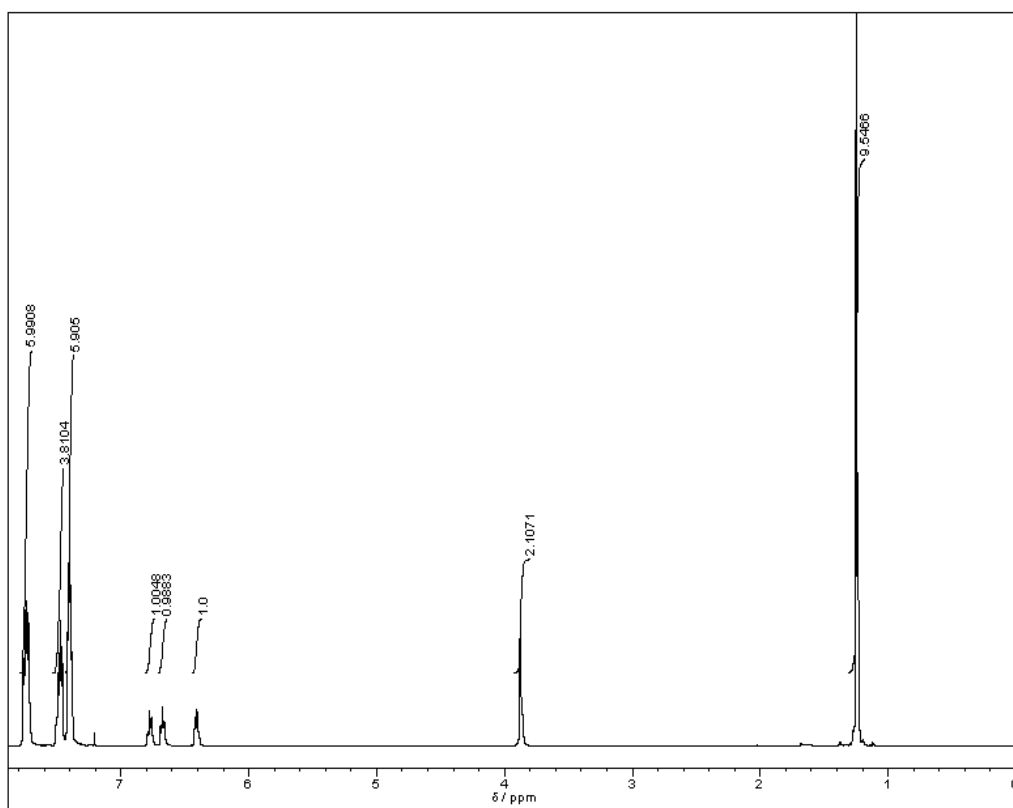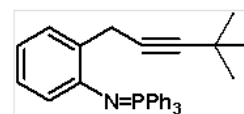

ObsNuc  $^1\text{H}$   
ObsFreq 500.0 MHz  
Solvent  $\text{CDCl}_3$

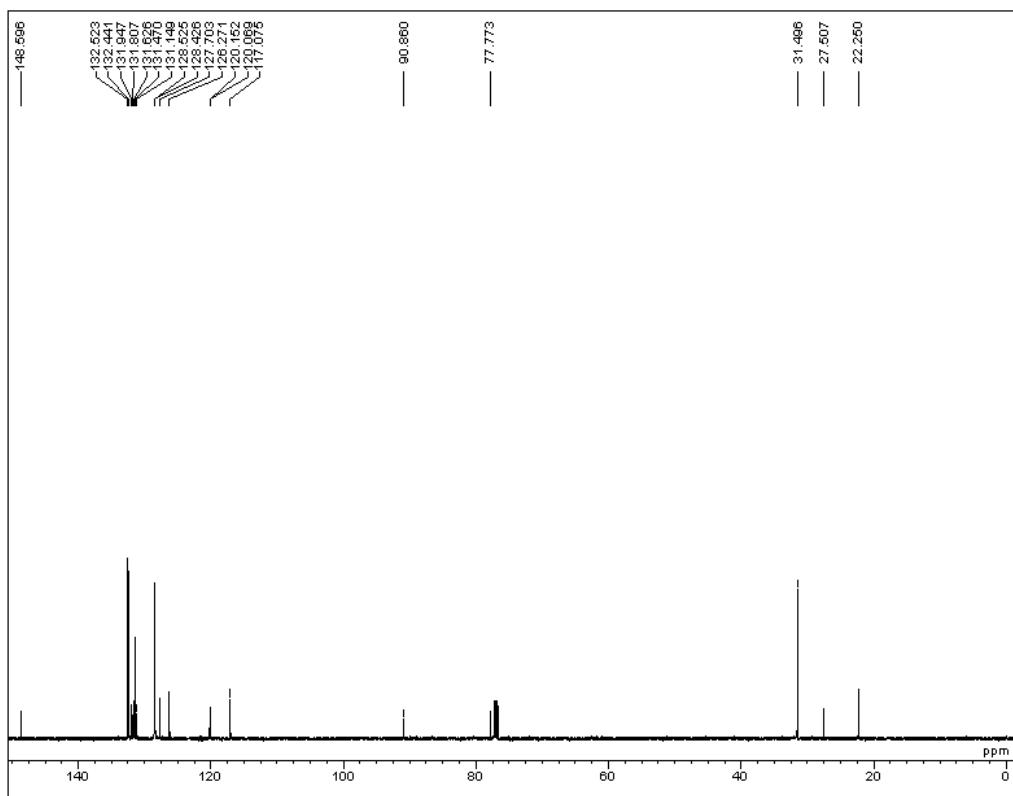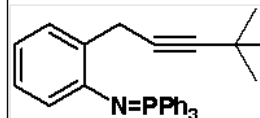

ObsNuc  $^{13}\text{C}$   
ObsFreq 125.65 MHz  
Solvent  $\text{CDCl}_3$

12d

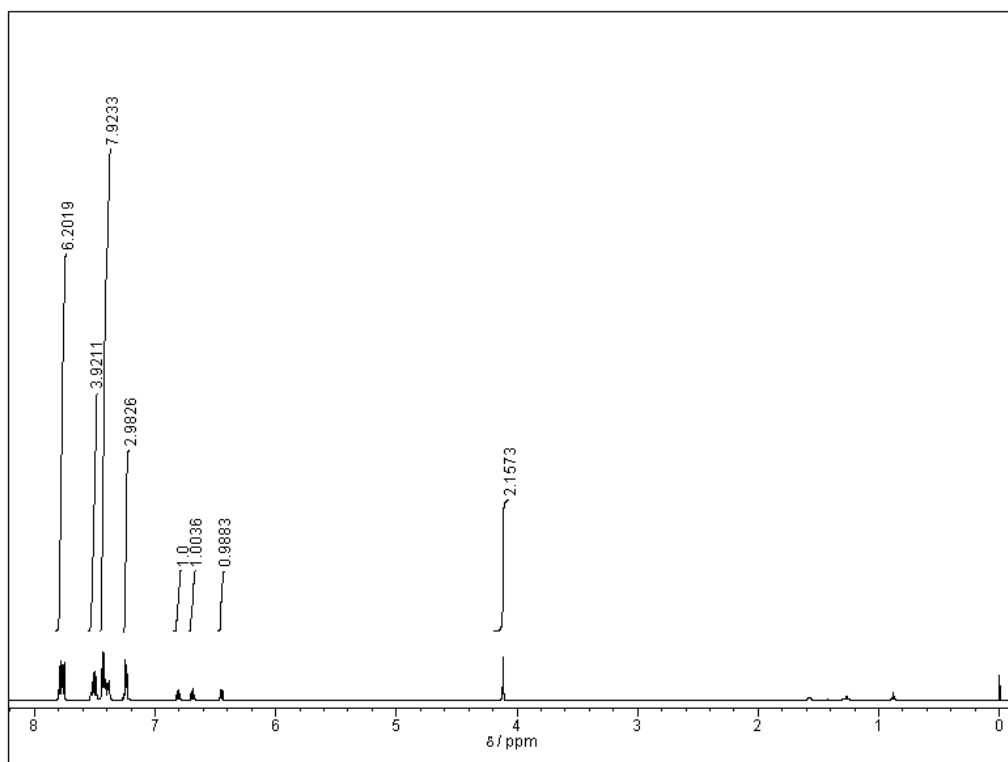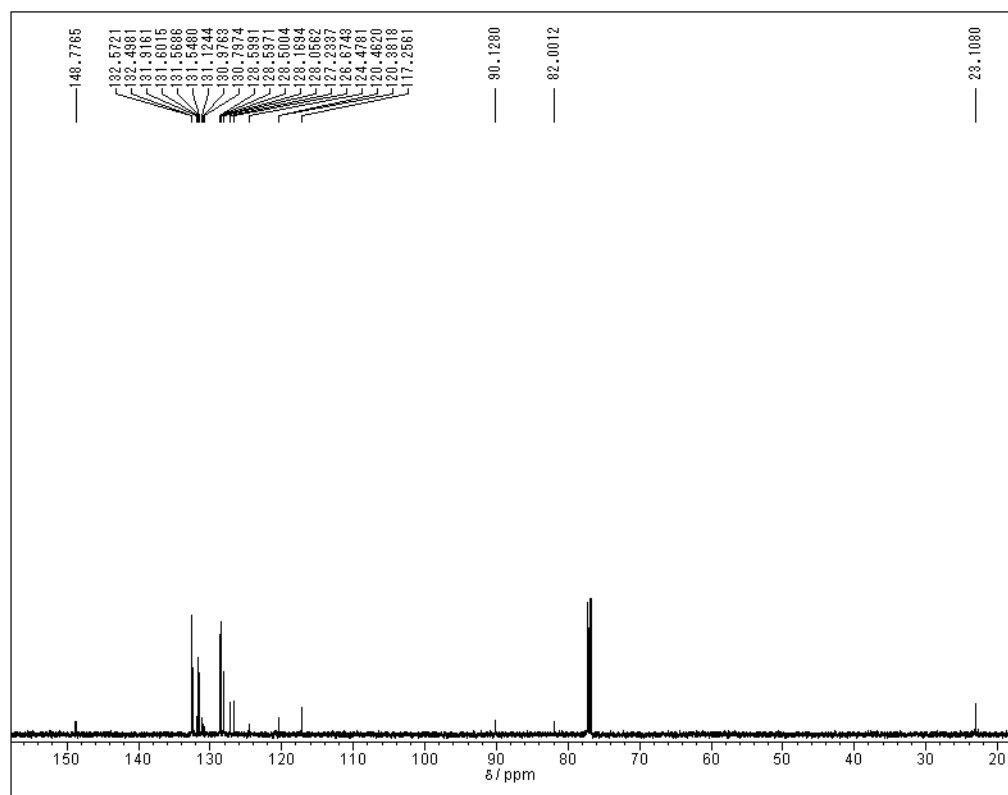



12f

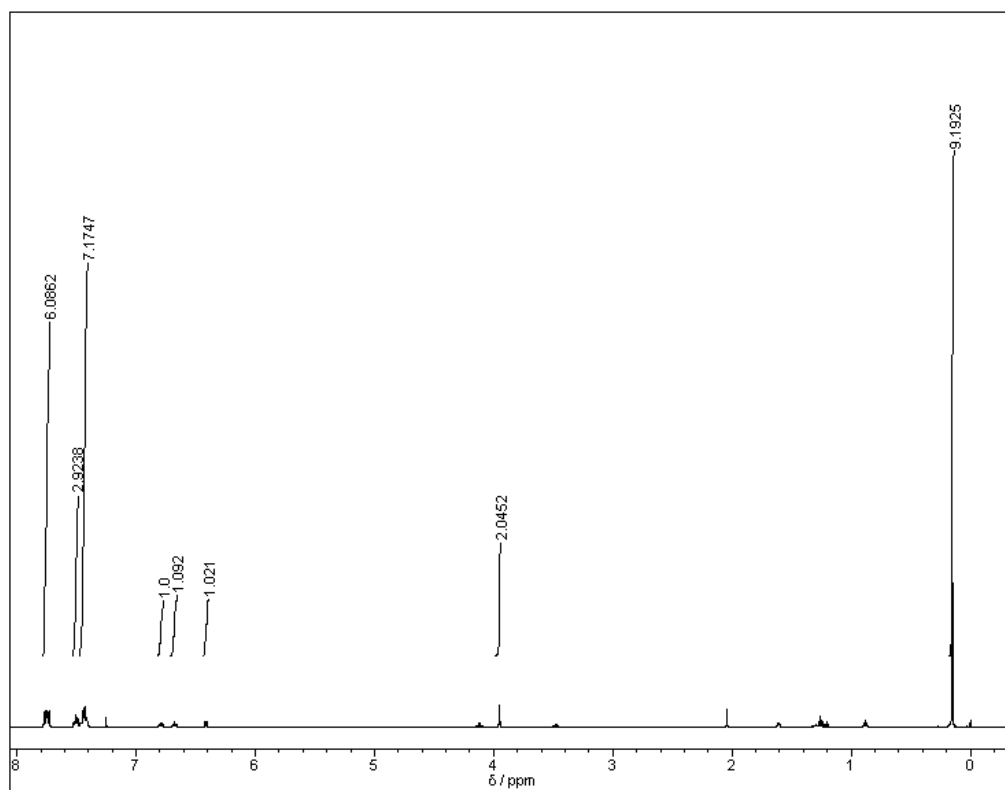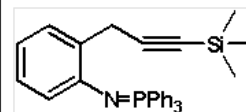

ObsNuc 1H  
ObsFreq 500.0 MHz  
Solvent CDCl<sub>3</sub>

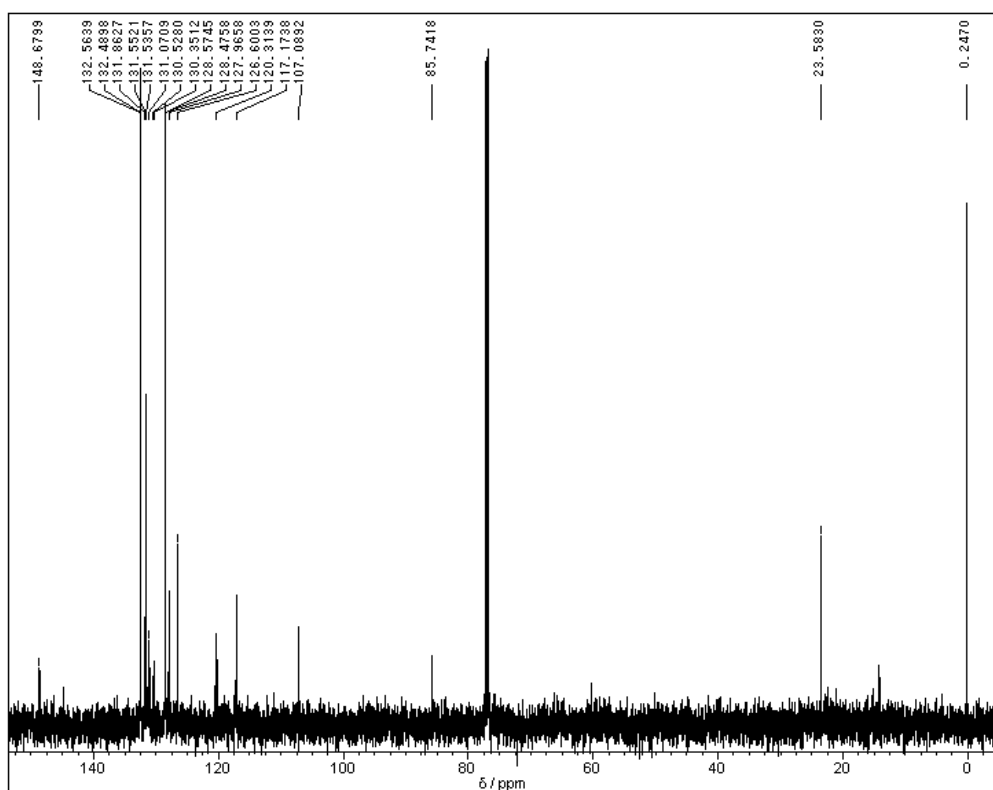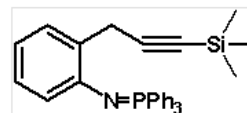

ObsNuc 13C  
ObsFreq 125.65 MHz  
Solvent CDCl<sub>3</sub>



13a

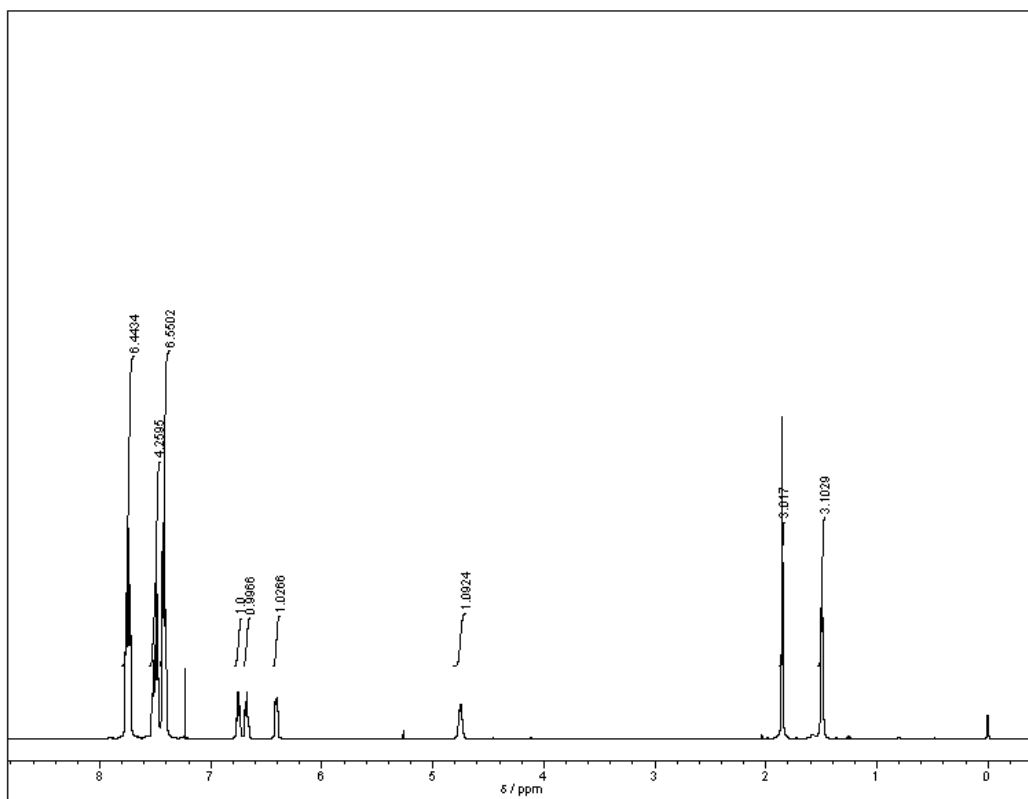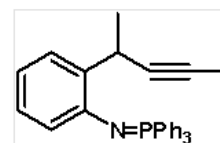

ObsNuc  $^1\text{H}$   
ObsFreq 500.0 MHz  
Solvent  $\text{CDCl}_3$

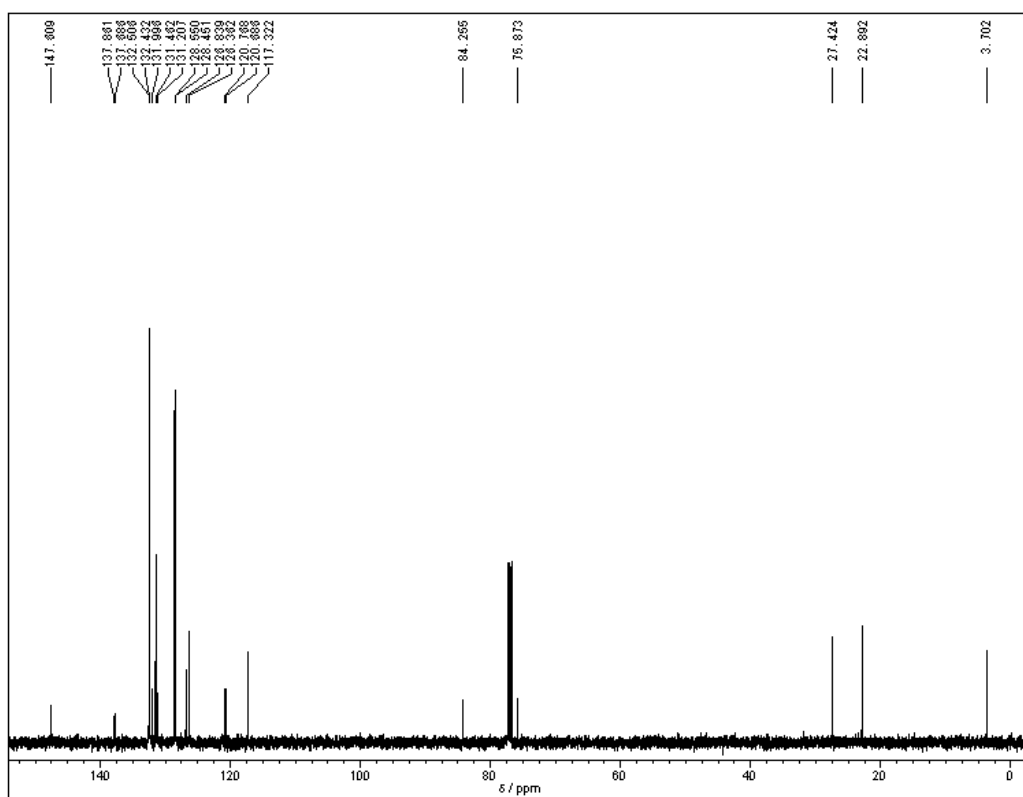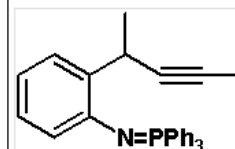

ObsNuc  $^{13}\text{C}$   
ObsFreq 125.65 MHz  
Solvent  $\text{CDCl}_3$

13b

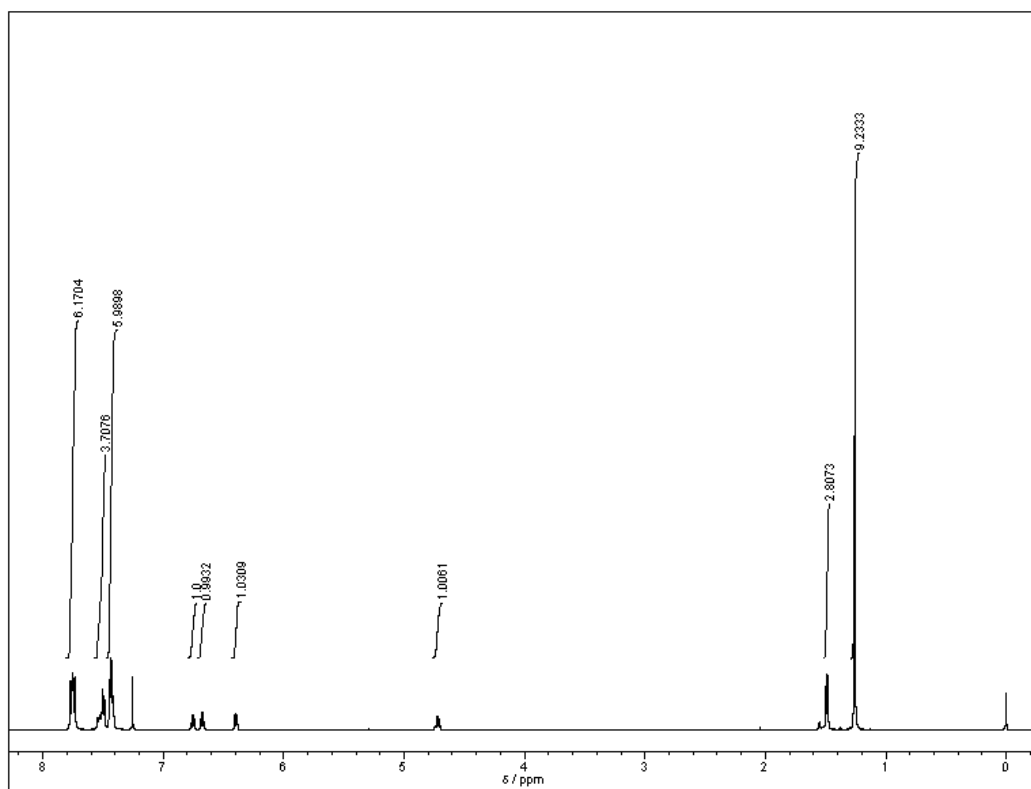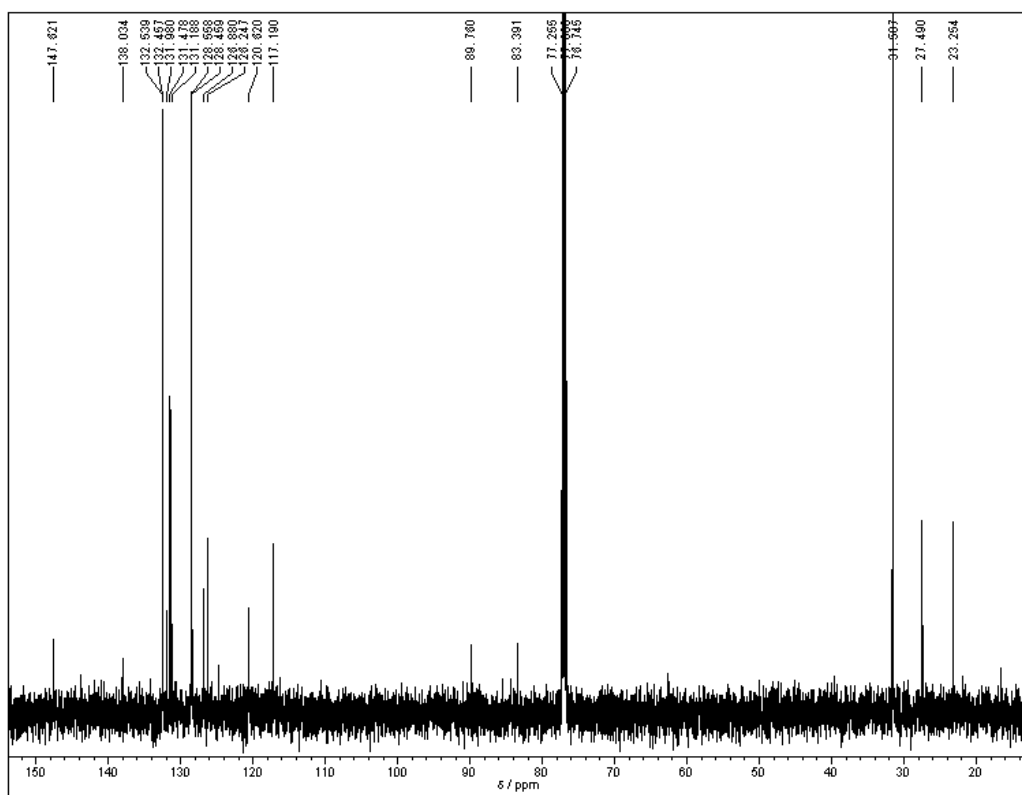

13c

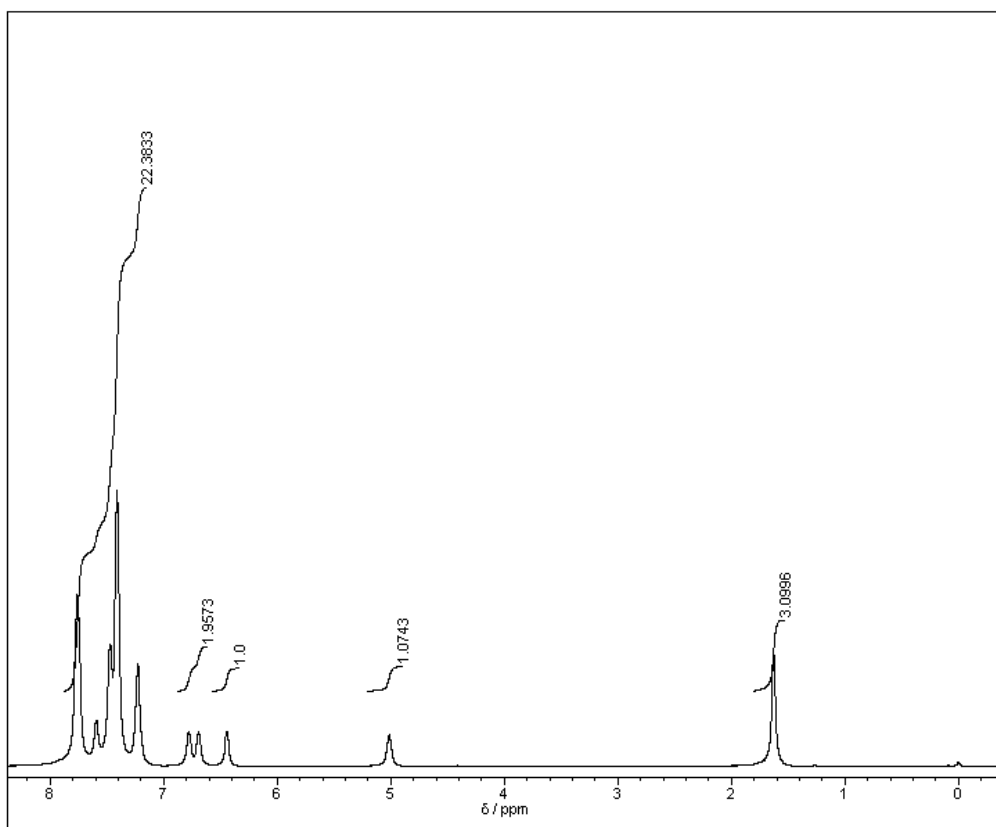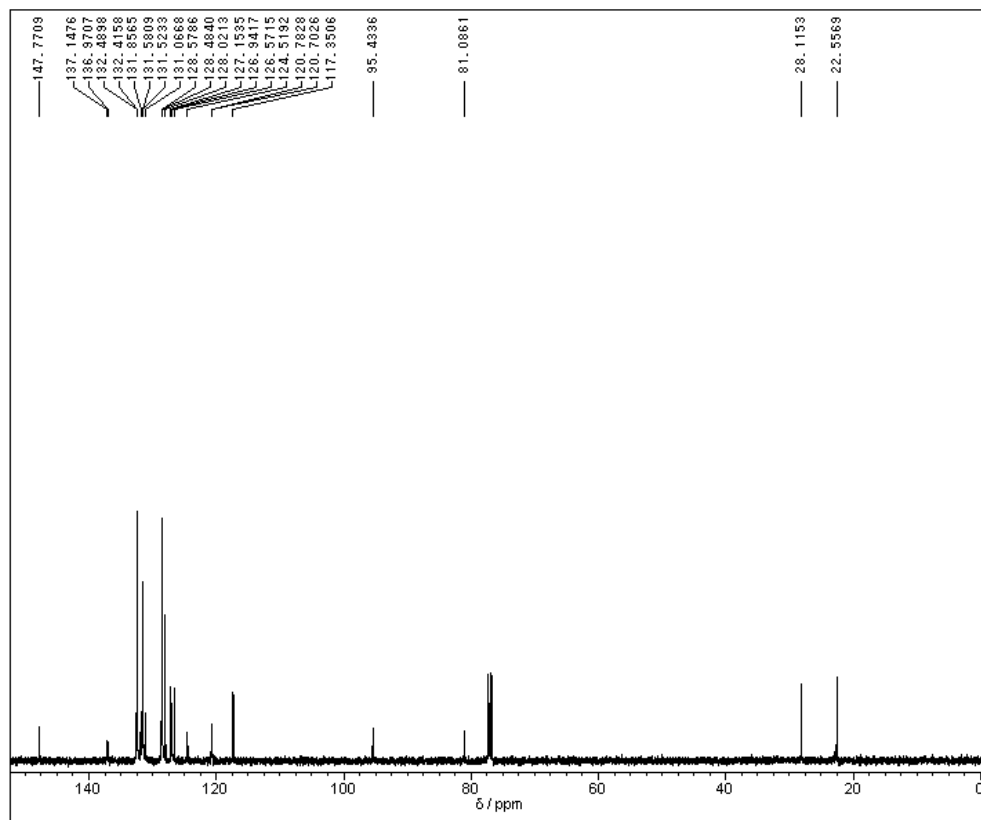



13d

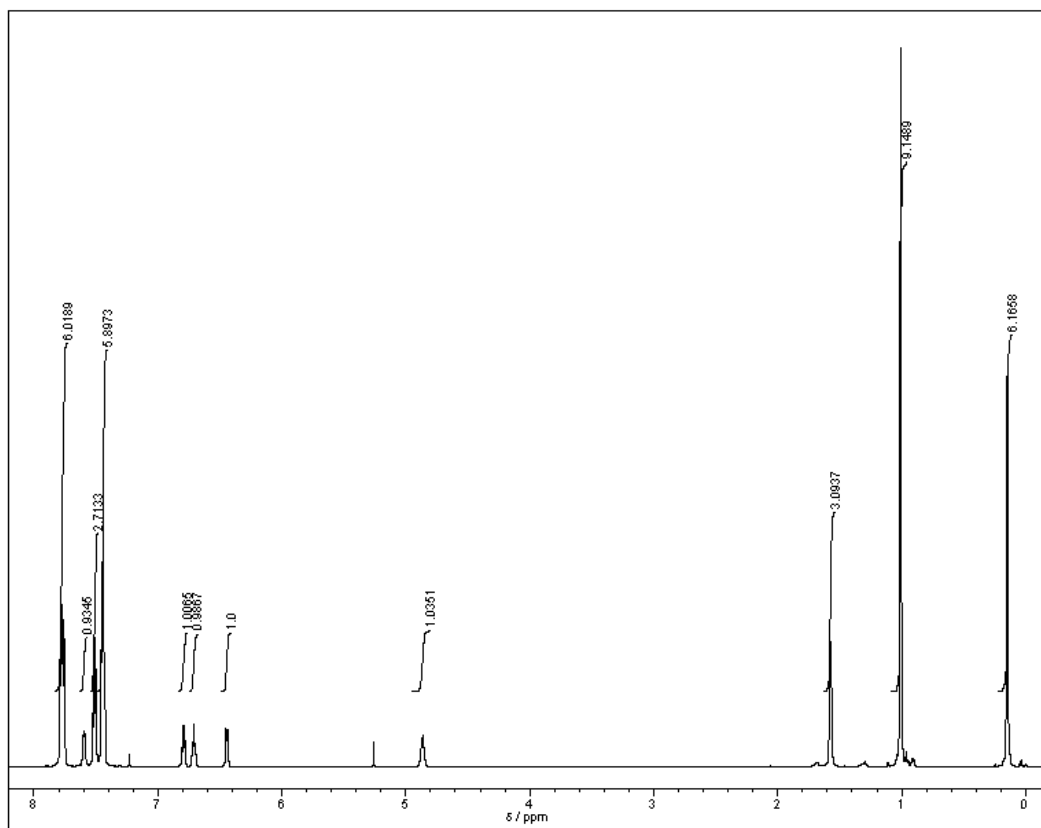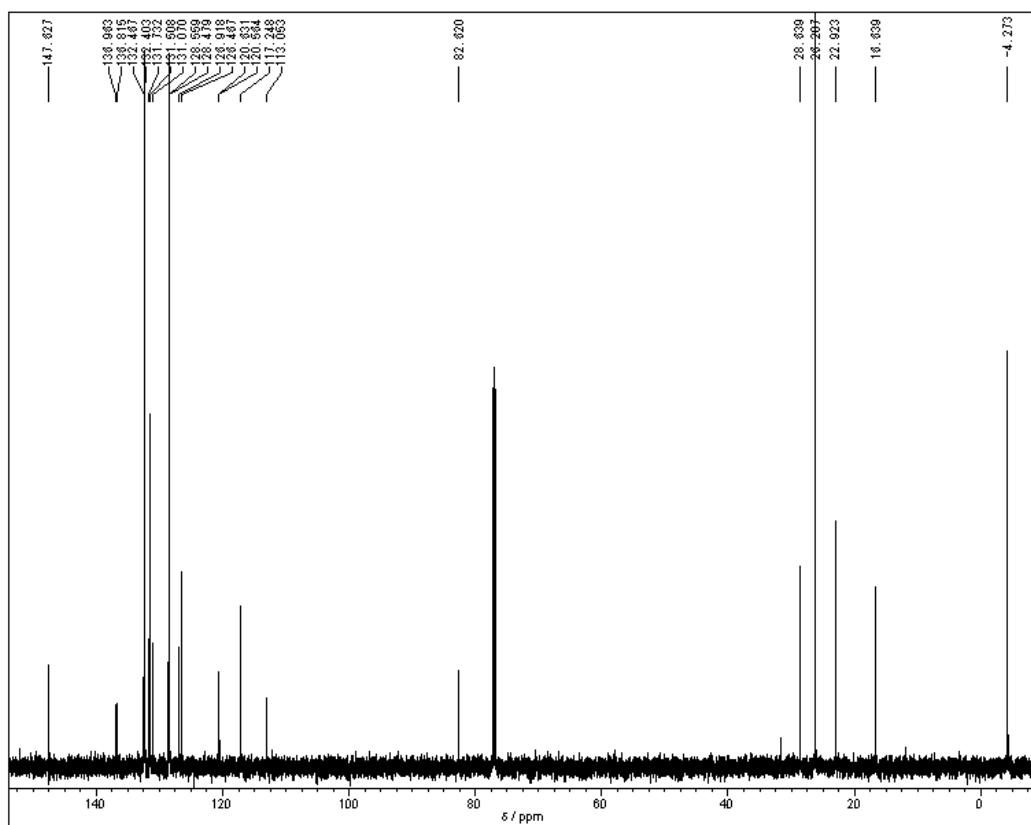

14a

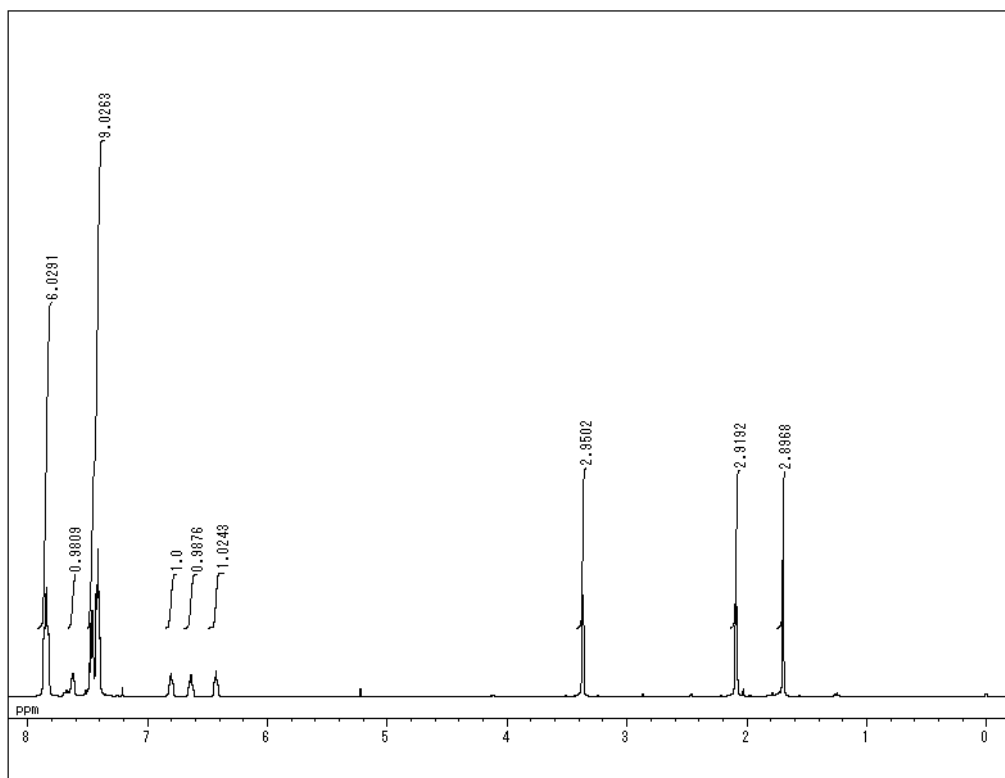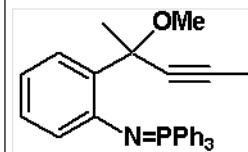

ObsNuc <sup>1</sup>H  
ObsFreq 500.0 MHz  
Solvent CDCl<sub>3</sub>

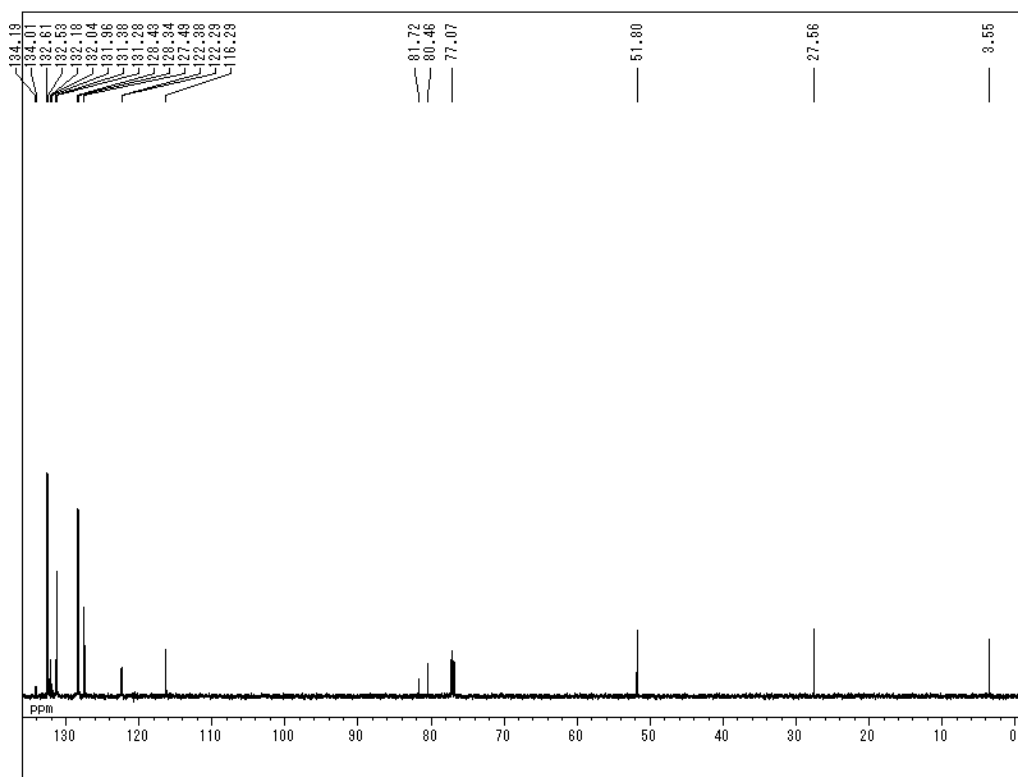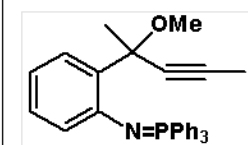

ObsNuc <sup>13</sup>C  
ObsFreq 125.65 MHz  
Solvent CDCl<sub>3</sub>

14b

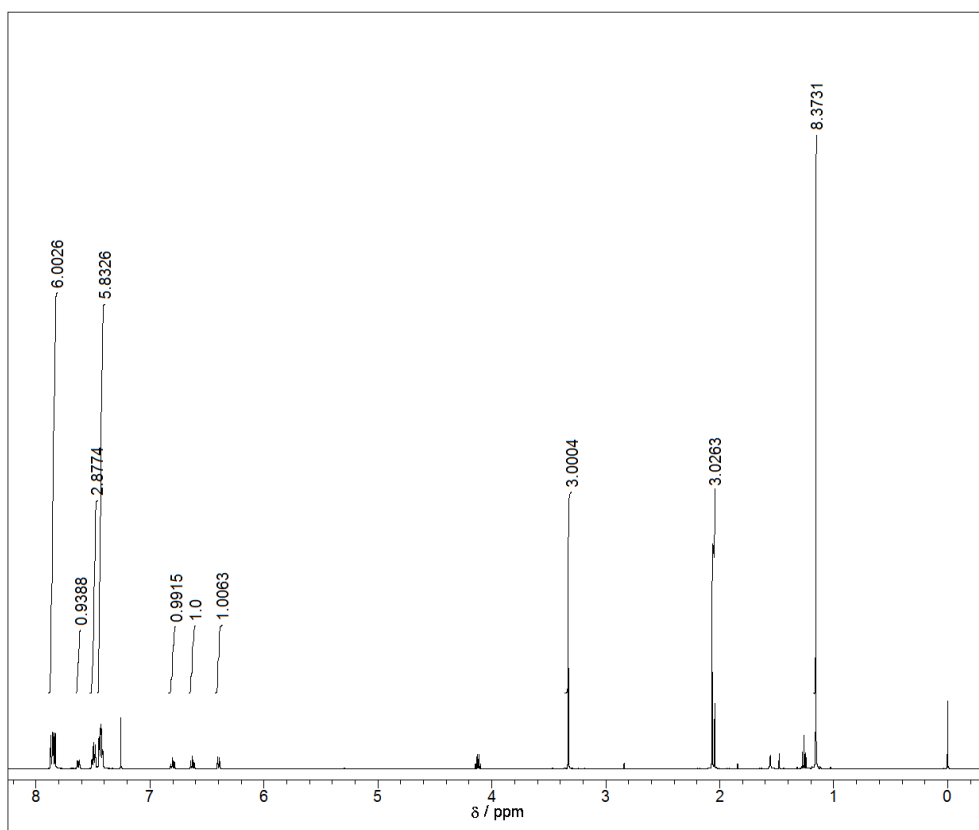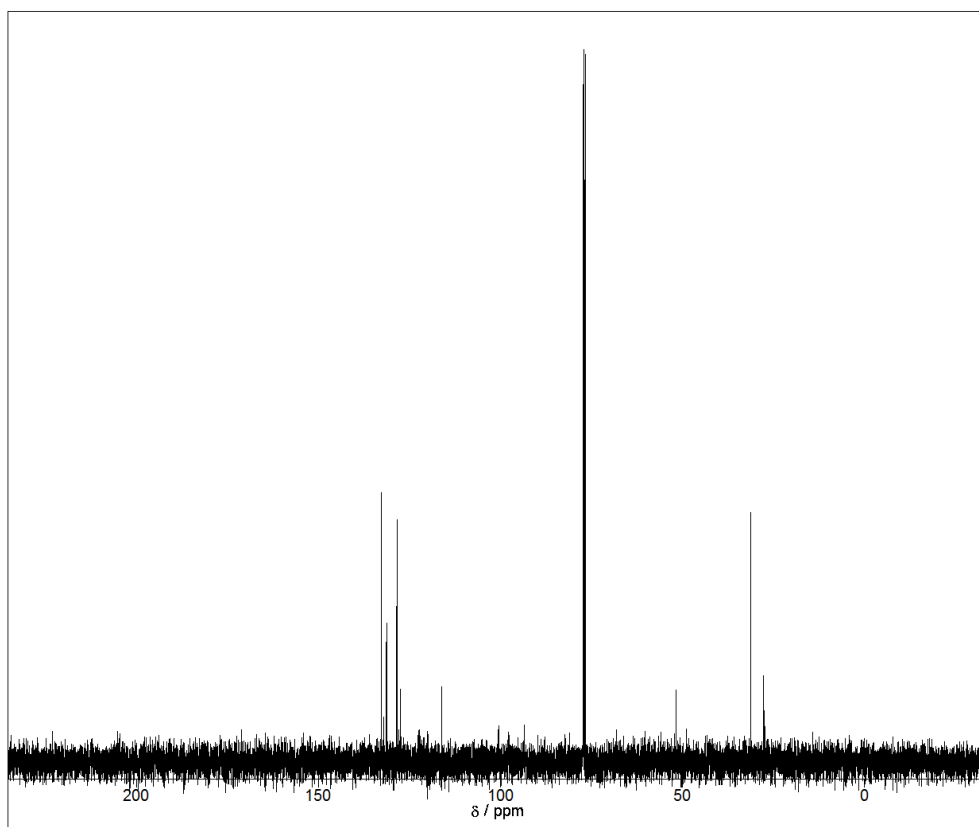

15a

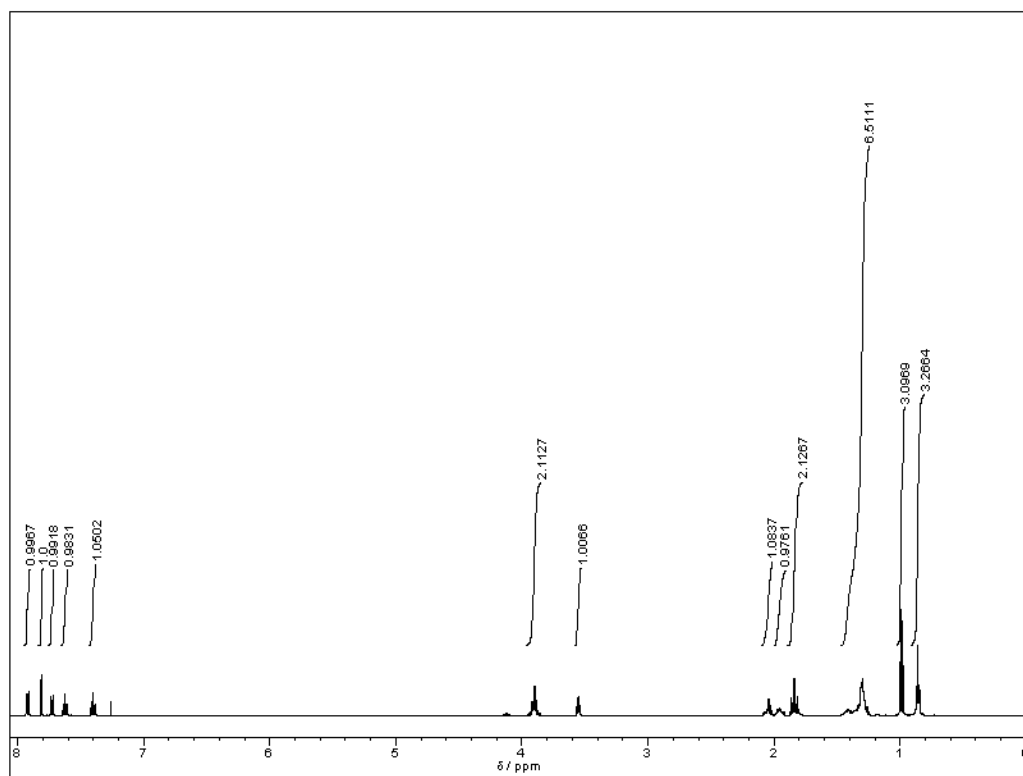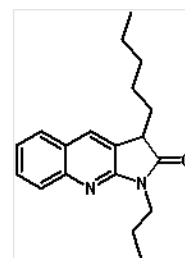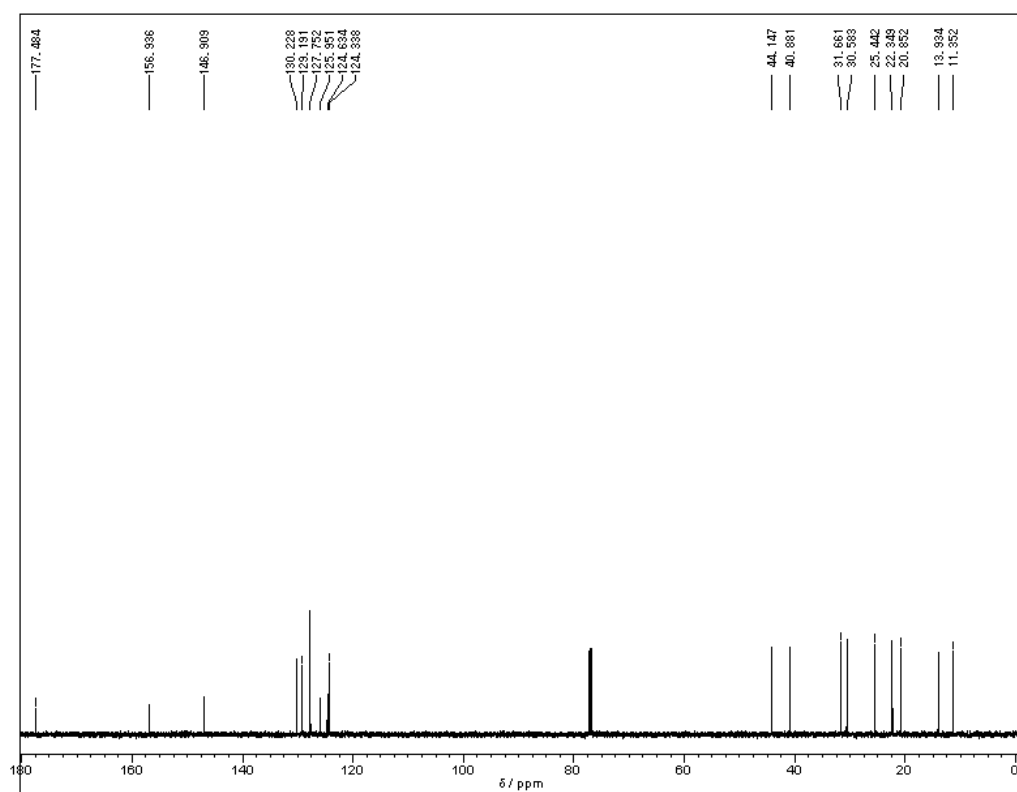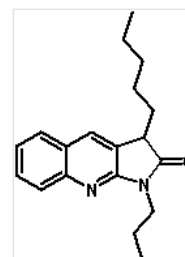

15b

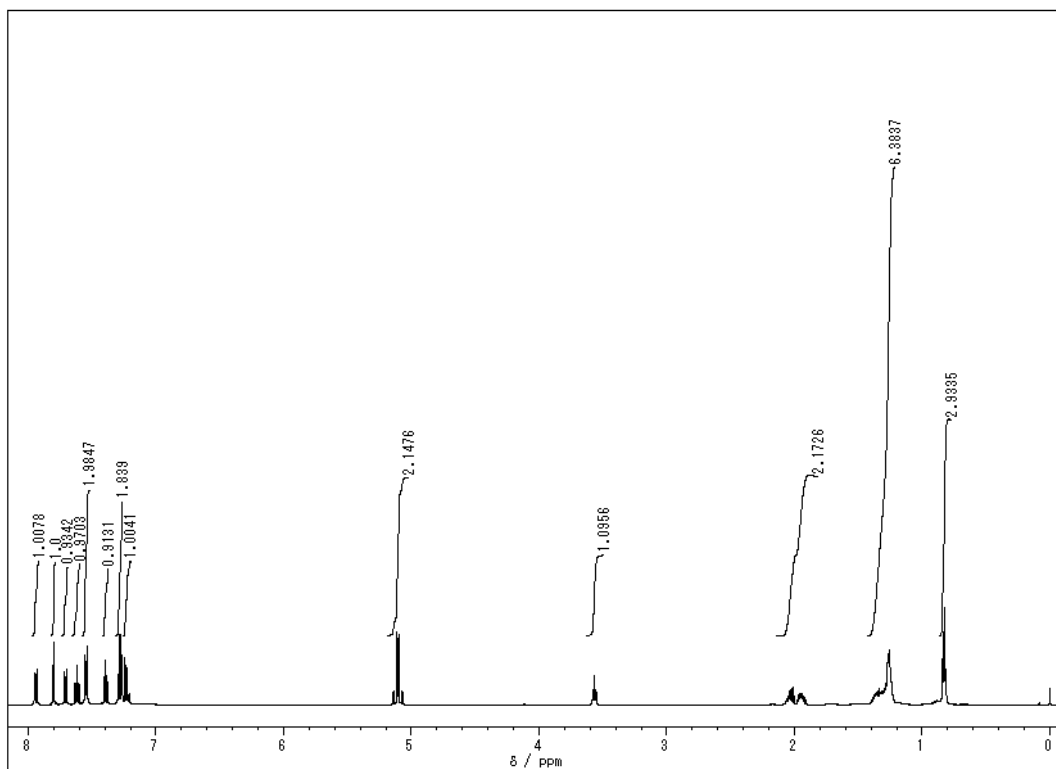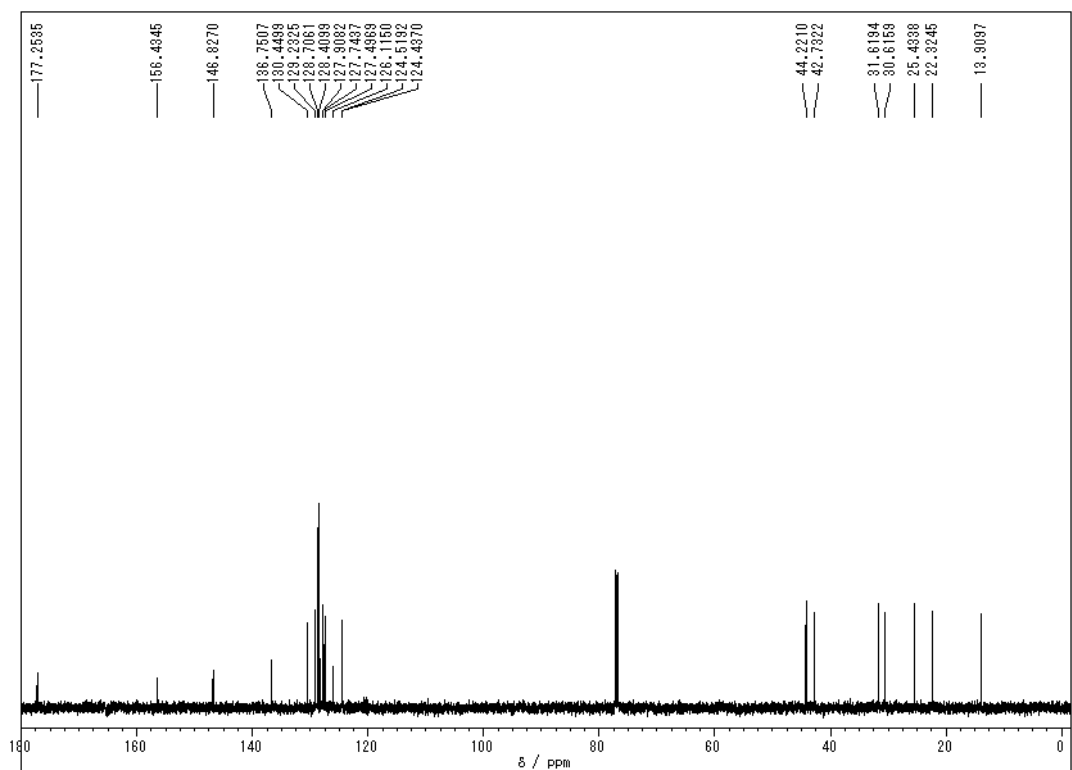

15c

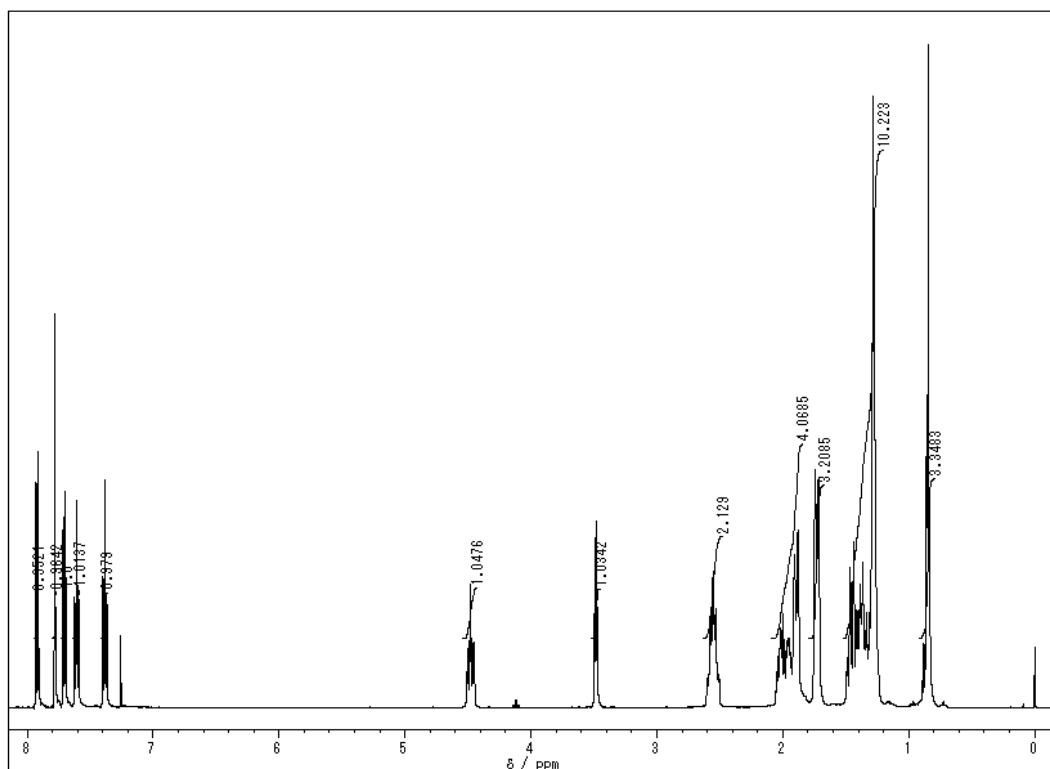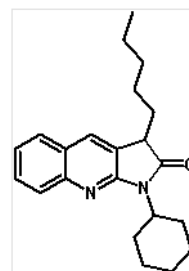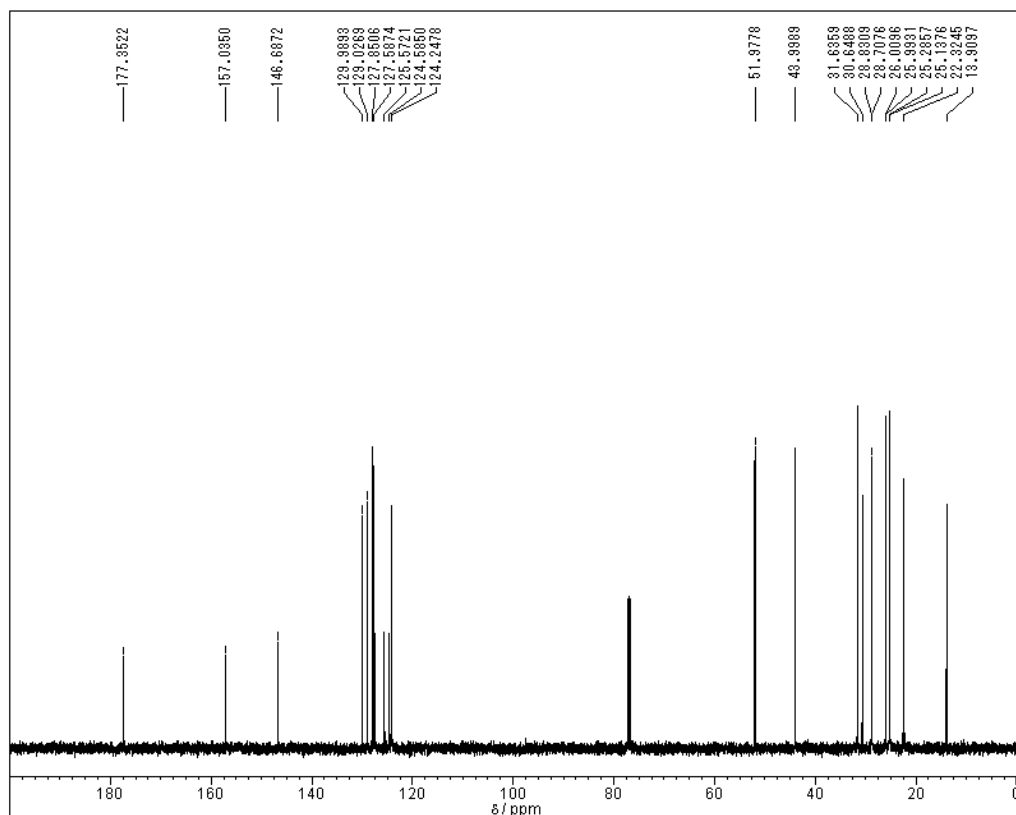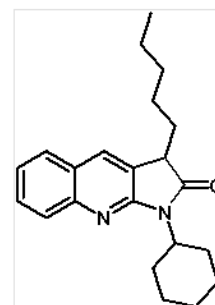

15d

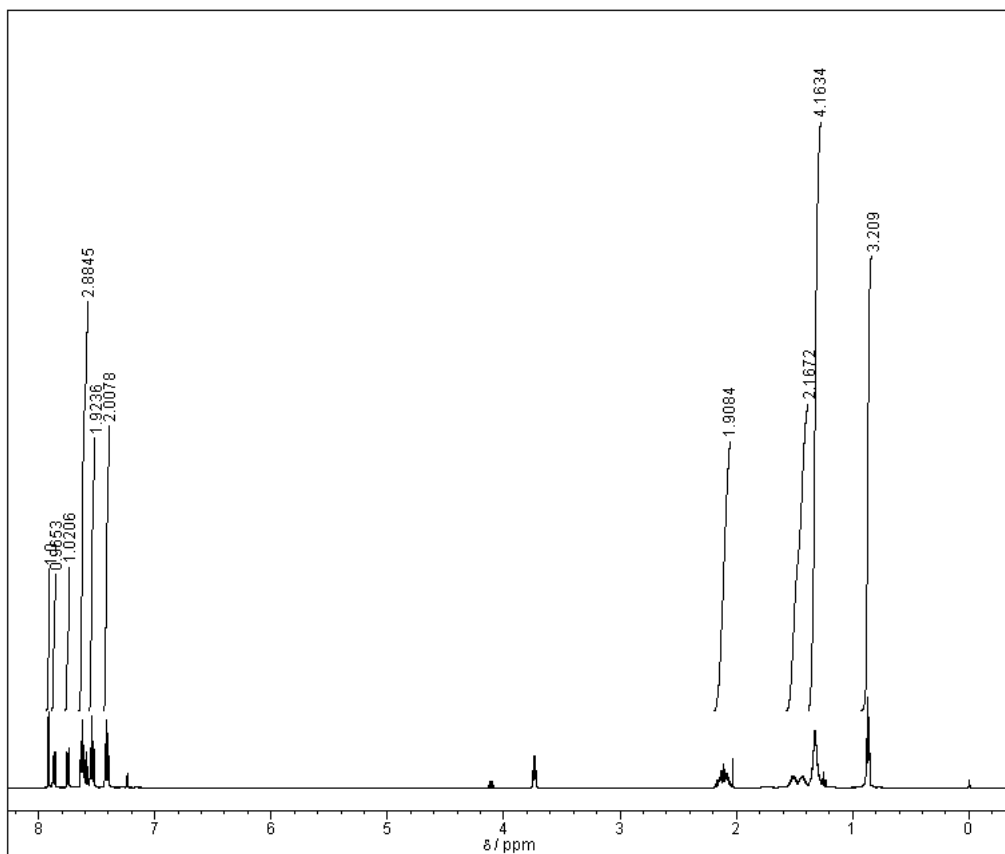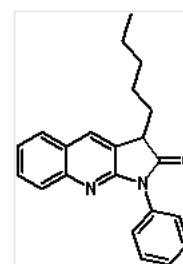

ObsNuc <sup>1</sup>H  
ObsFreq 500.0 MHz  
Solvent CDCl<sub>3</sub>

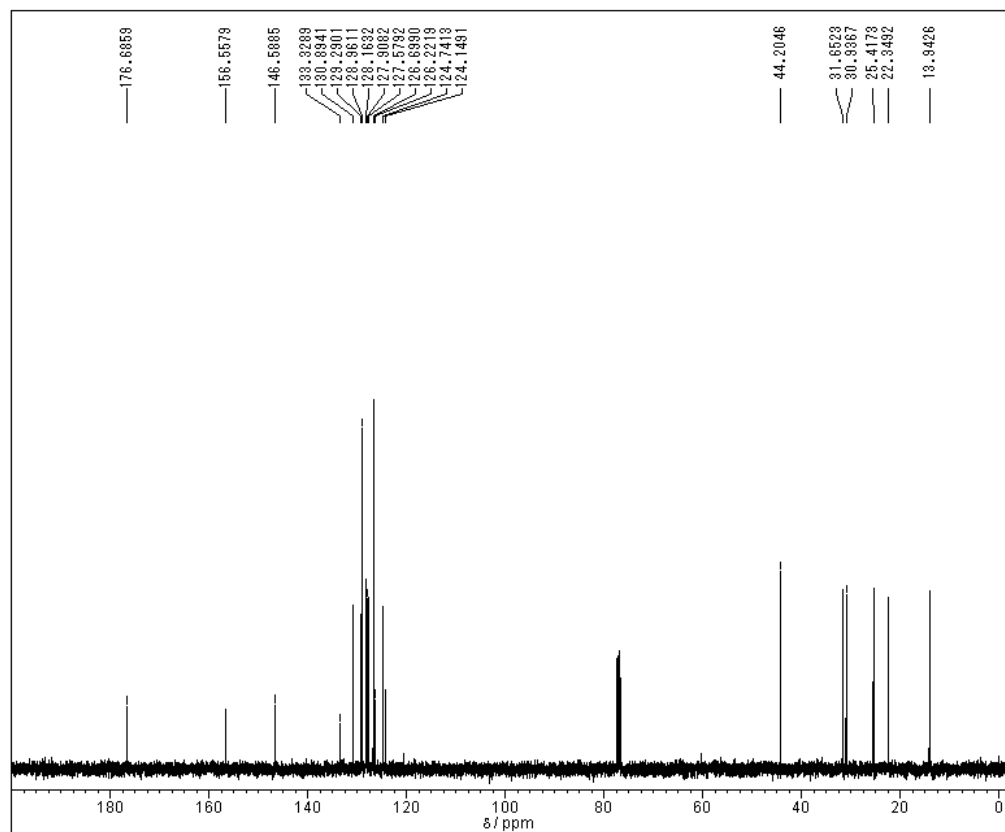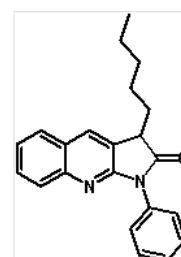

ObsNuc <sup>13</sup>C  
ObsFreq 125.65 MHz  
Solvent CDCl<sub>3</sub>

15e

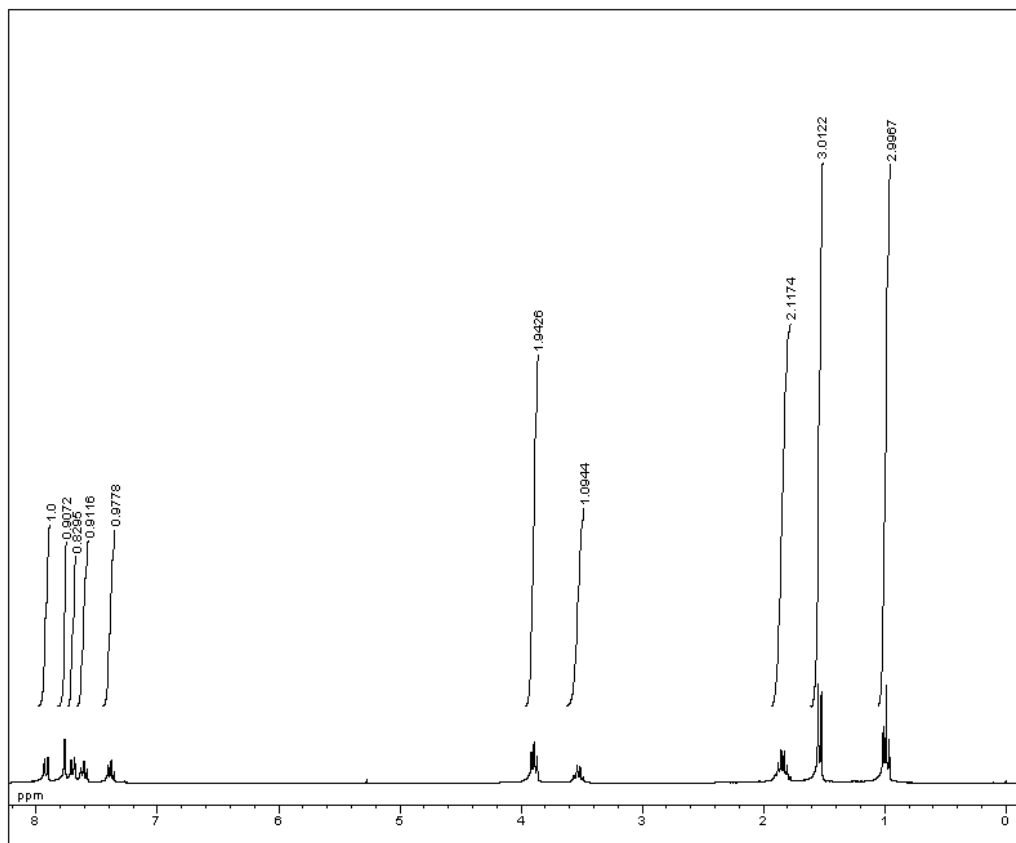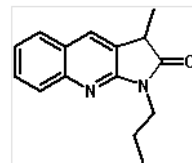

ObsNuc <sup>1</sup>H  
ObsFreq 300.01 MHz  
Solvent CDCl<sub>3</sub>

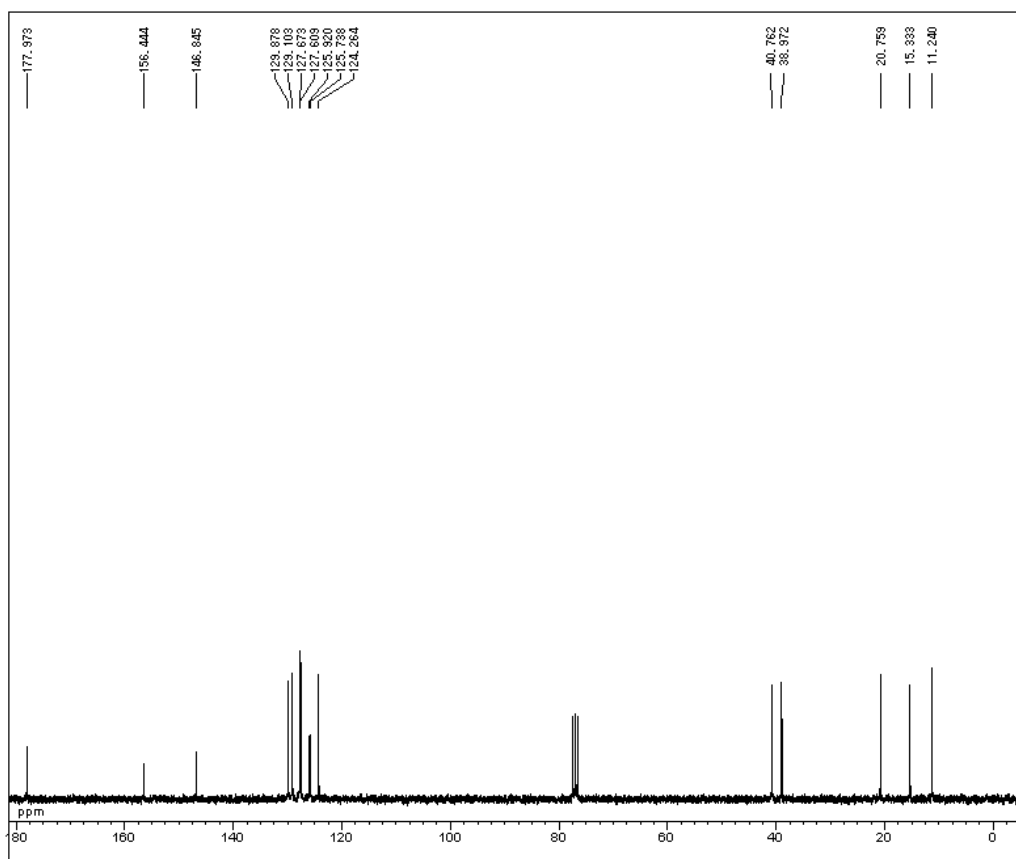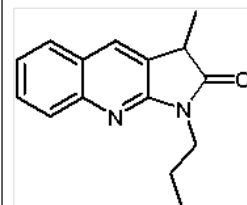

ObsNuc <sup>13</sup>C  
ObsFreq 75.44 MHz  
Solvent CDCl<sub>3</sub>



15f

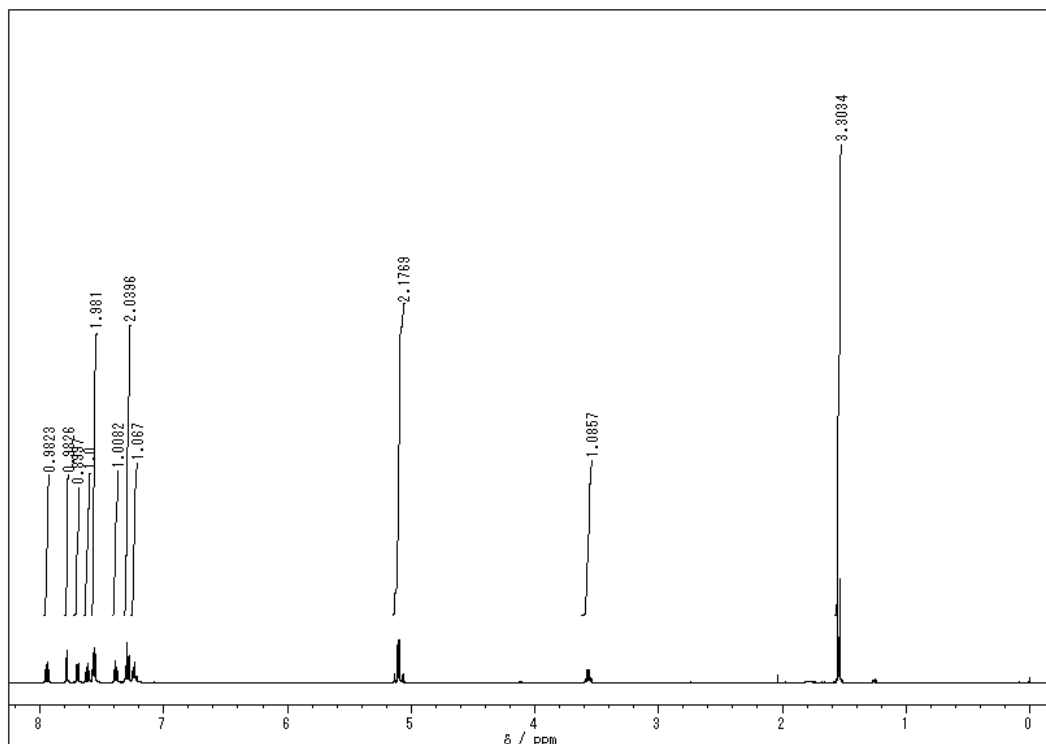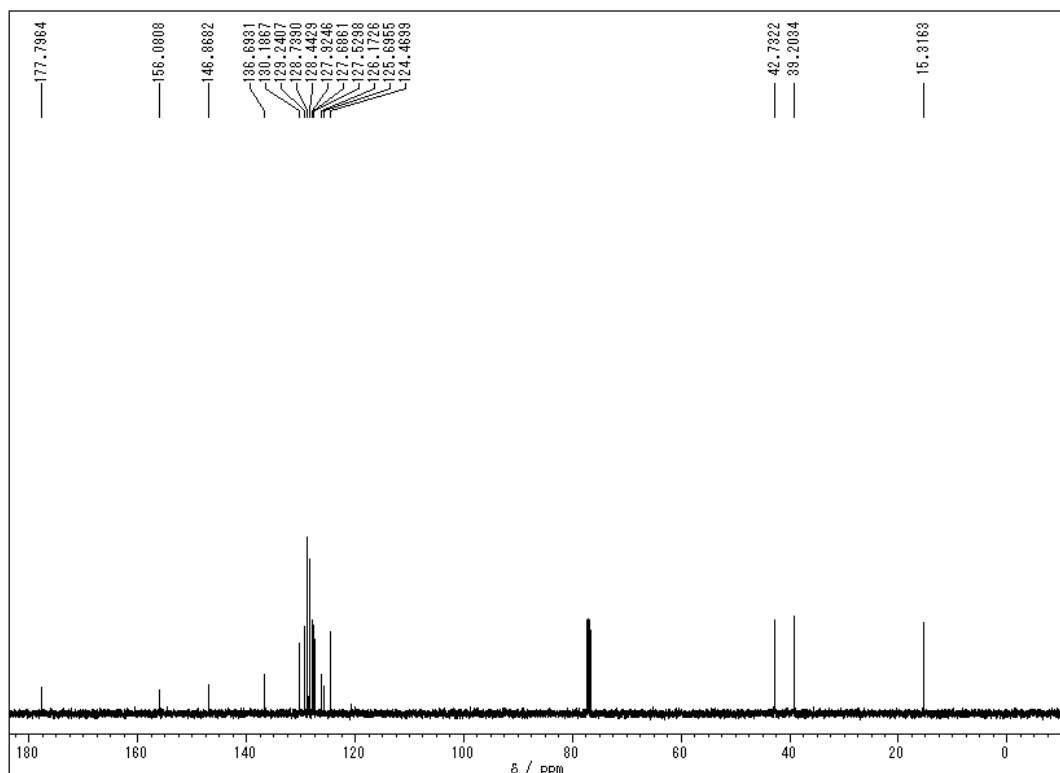

15g

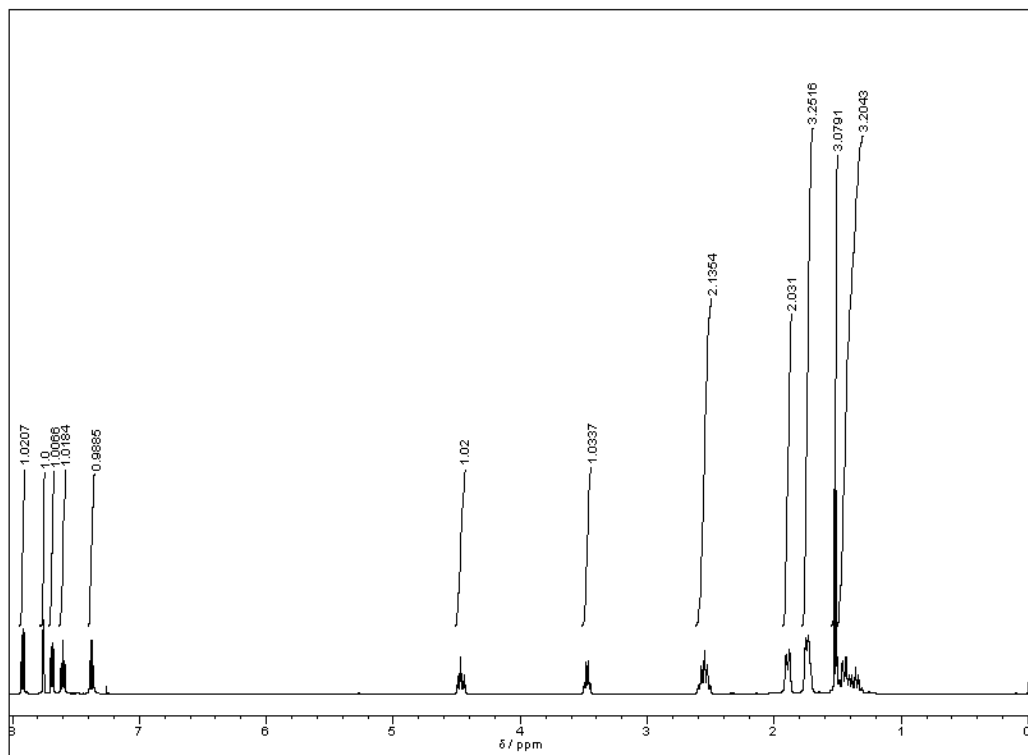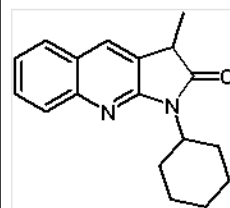

ObsNuc <sup>1</sup>H  
ObsFreq 500.0 MHz  
Solvent CDCl<sub>3</sub>

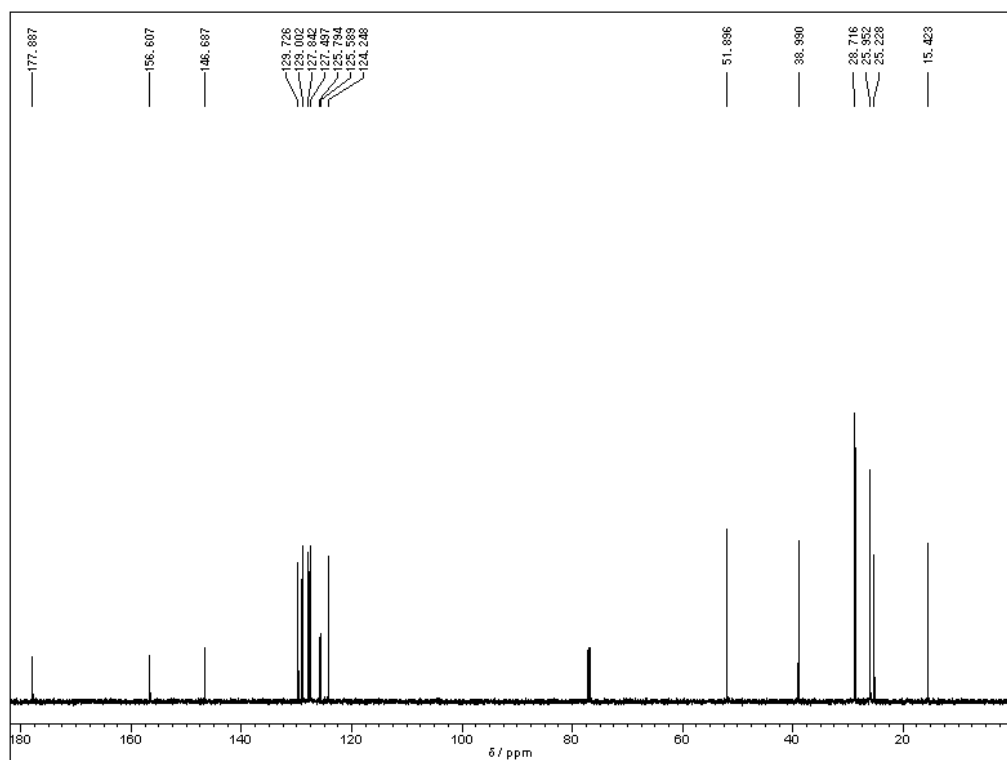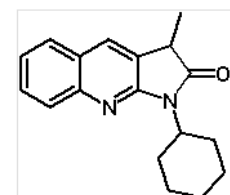

ObsNuc <sup>13</sup>C  
ObsFreq 125.65 MHz  
Solvent CDCl<sub>3</sub>

15h

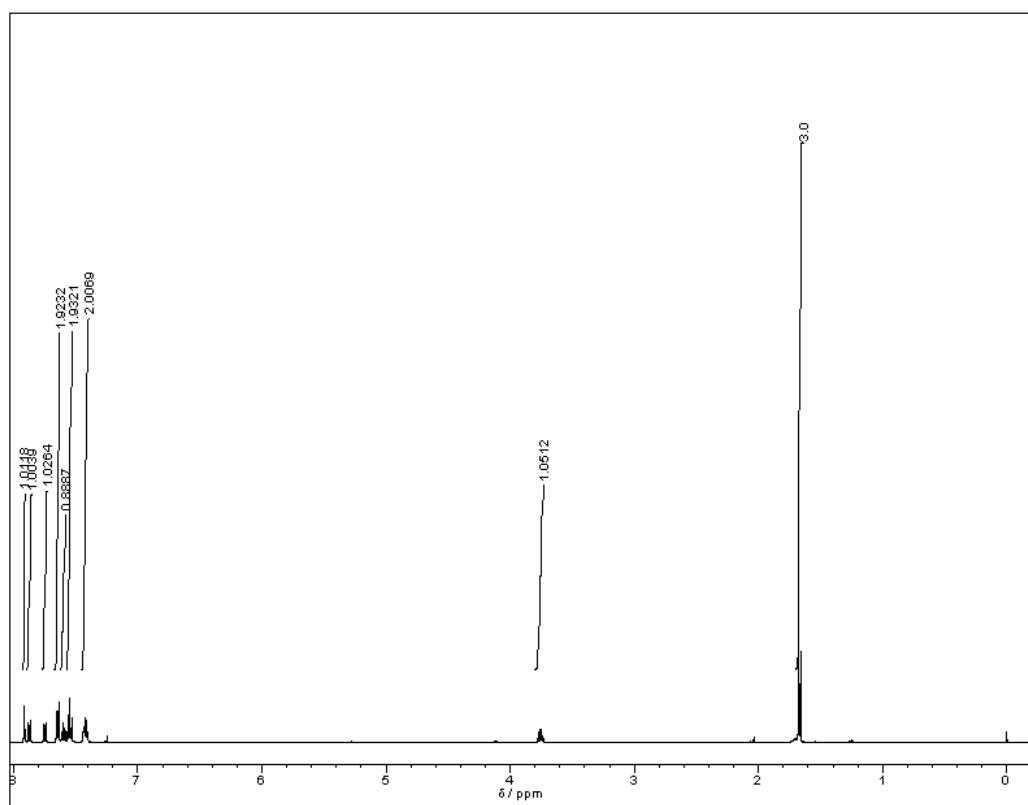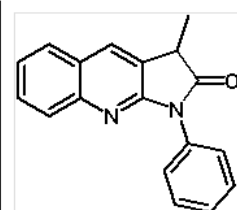

ObsNuc  $^1\text{H}$   
ObsFreq 500.0 MHz  
Solvent  $\text{CDCl}_3$

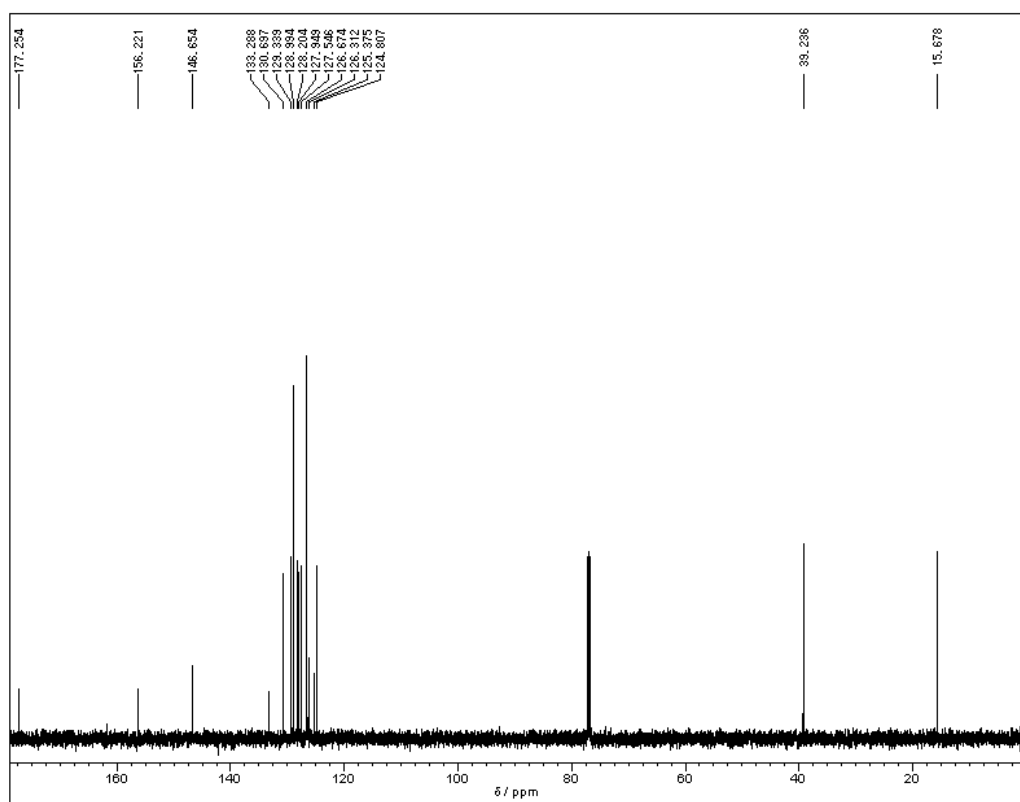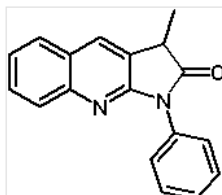

ObsNuc  $^{13}\text{C}$   
ObsFreq 125.65 MHz  
Solvent  $\text{CDCl}_3$

15i

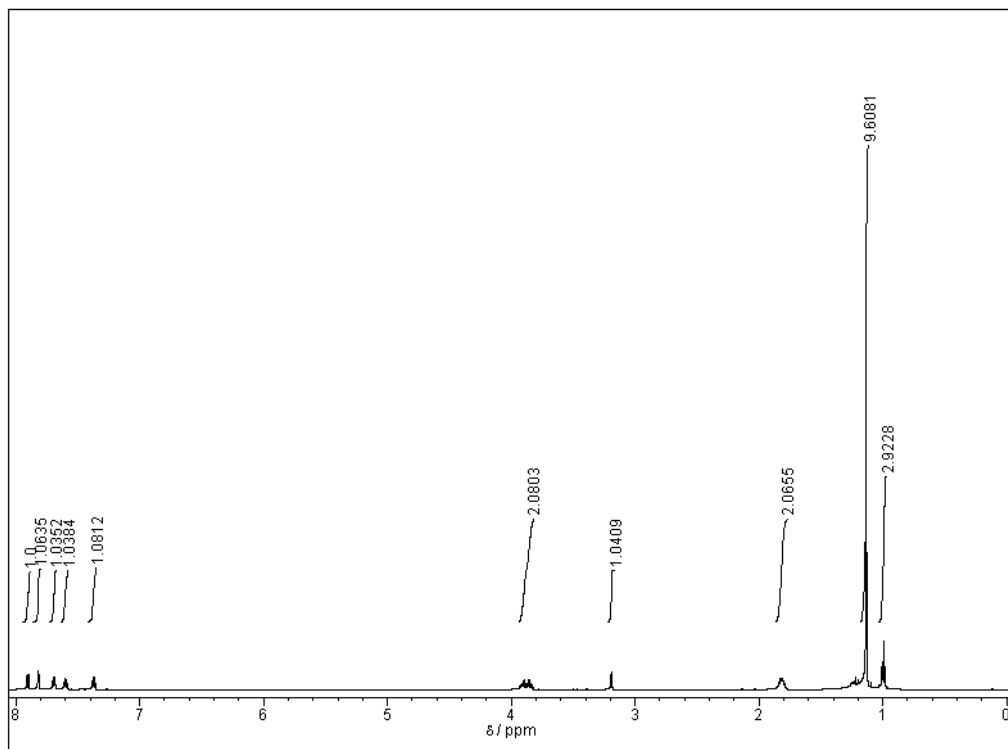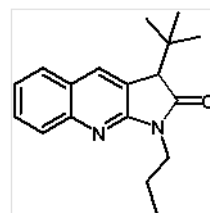

ObsNuc  $^1\text{H}$   
ObsFreq 600.13 MHz  
Solvent  $\text{CDCl}_3$

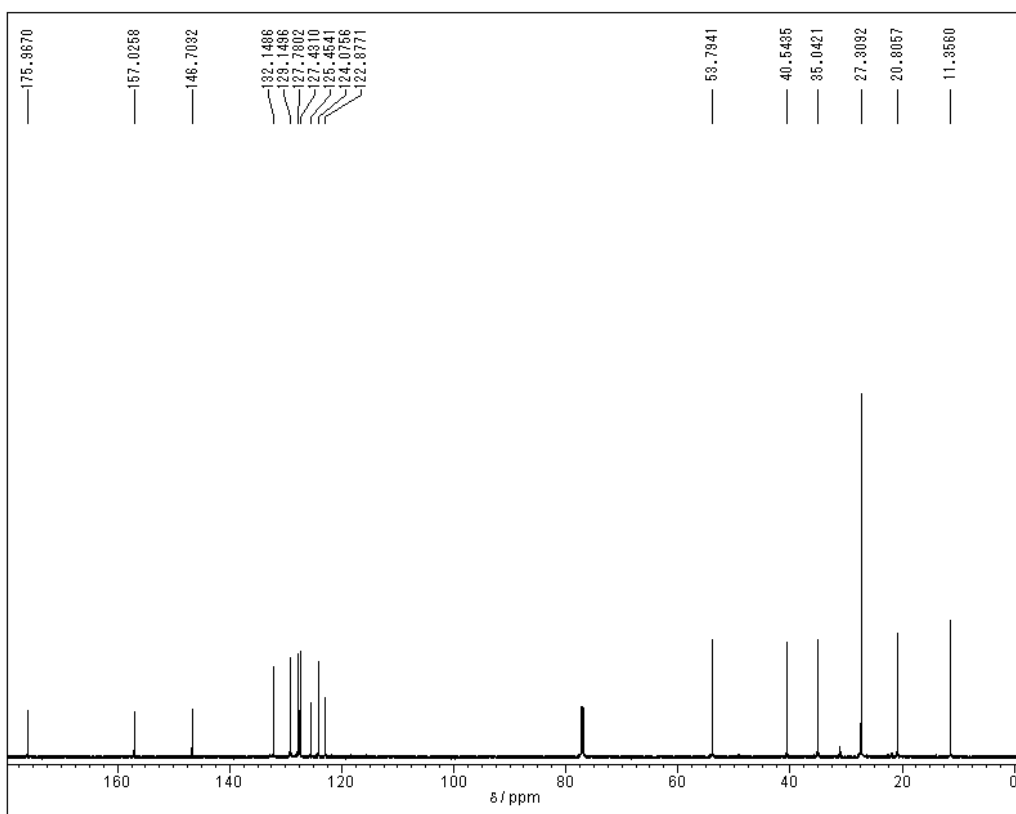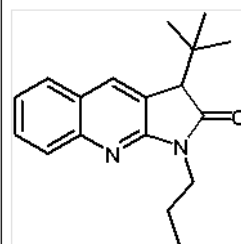

ObsNuc  $^{13}\text{C}$   
ObsFreq 150.9 MHz  
Solvent  $\text{CDCl}_3$

15j

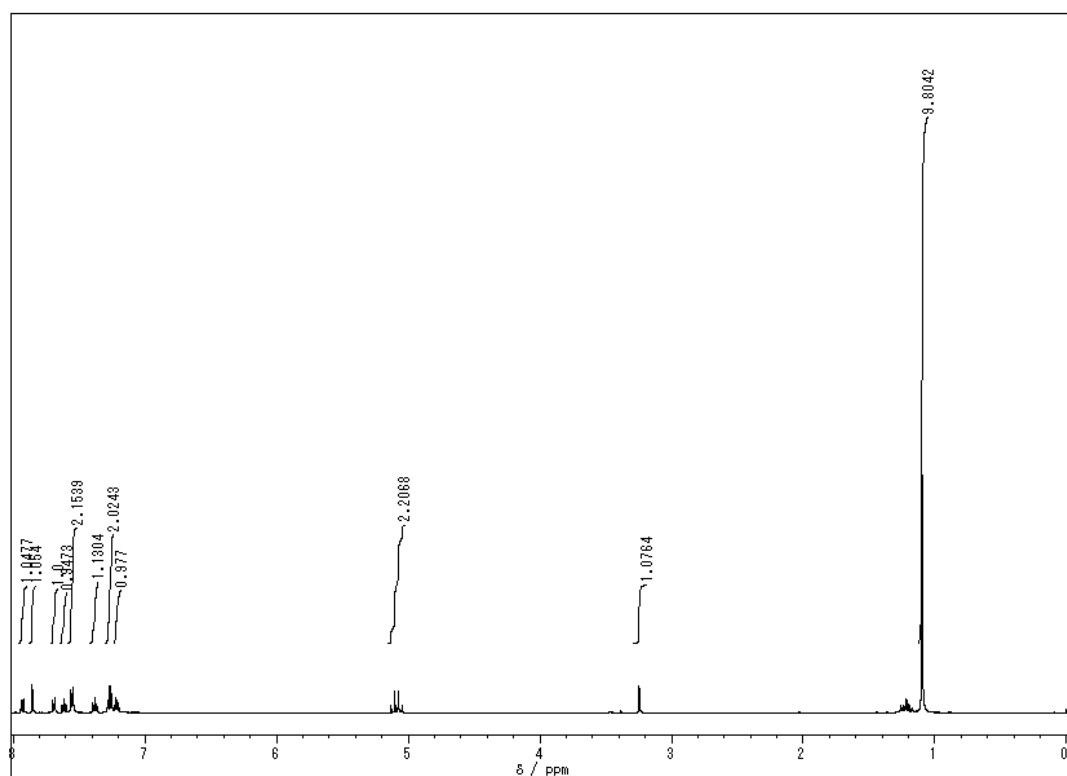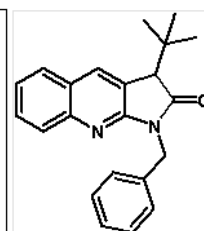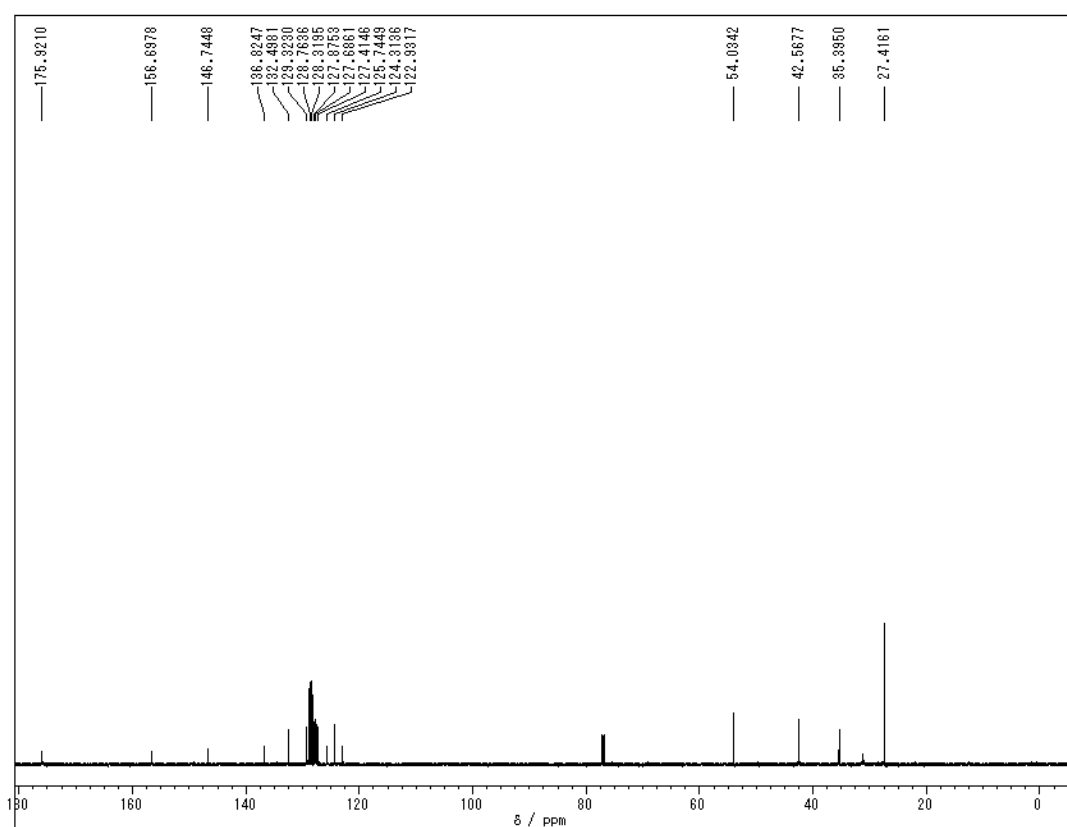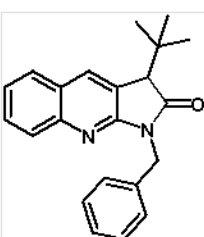

15k

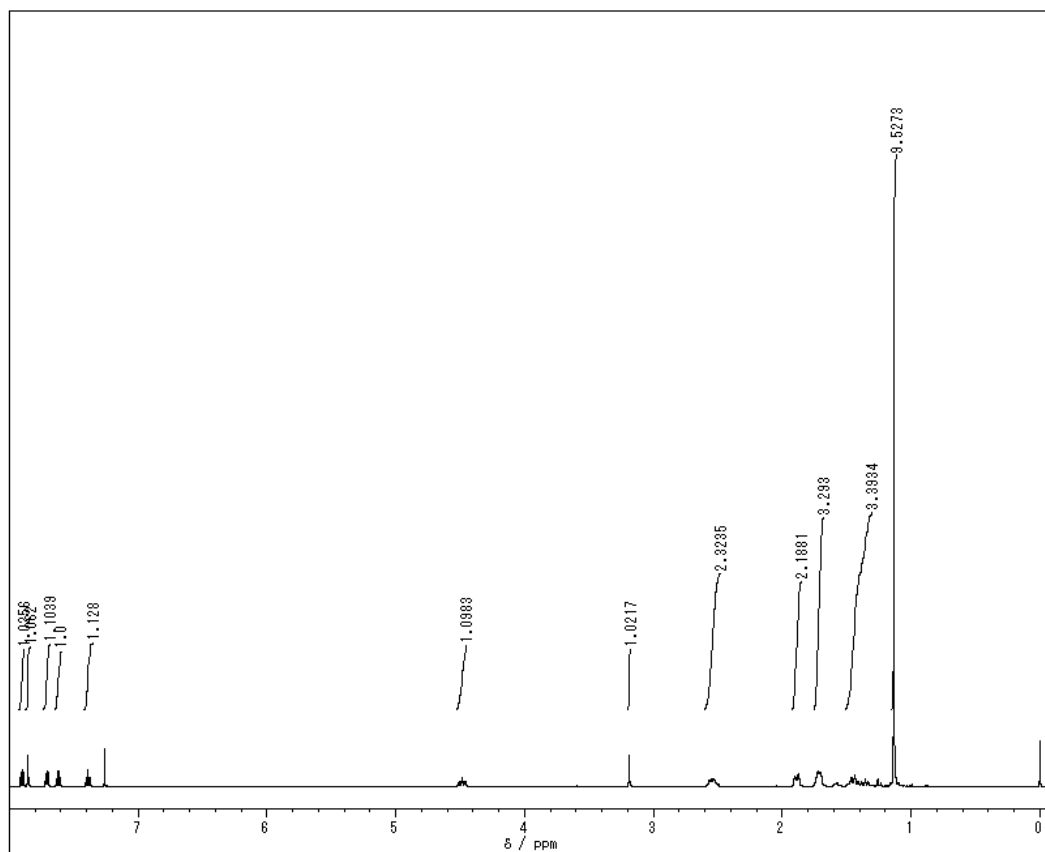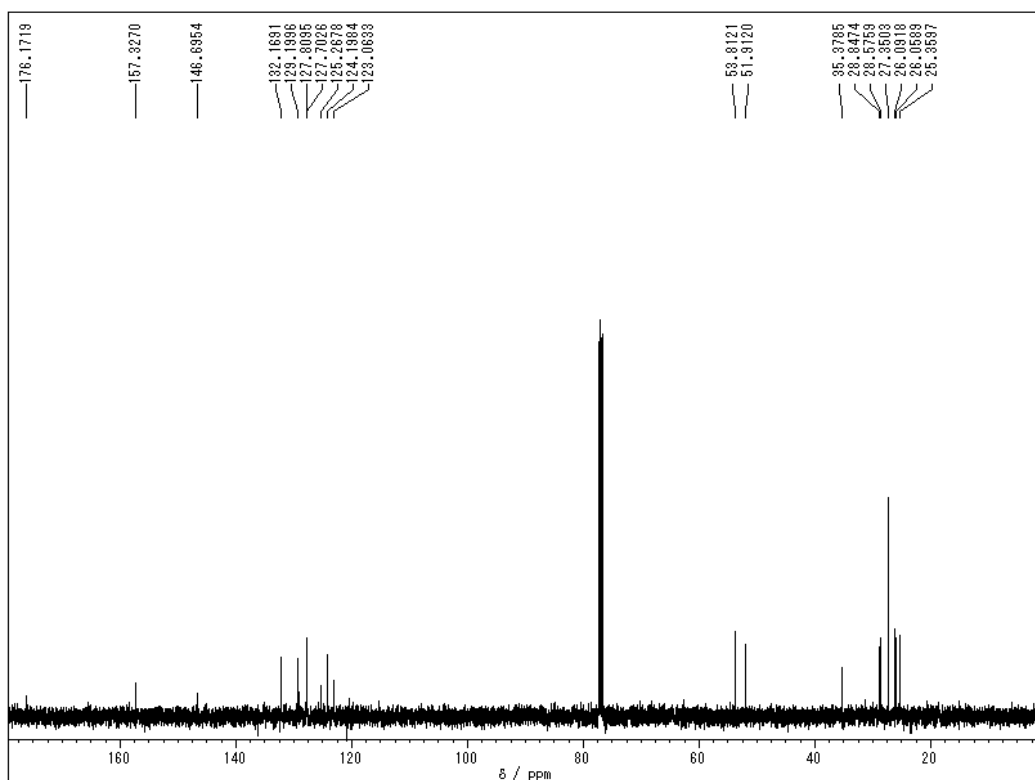

151

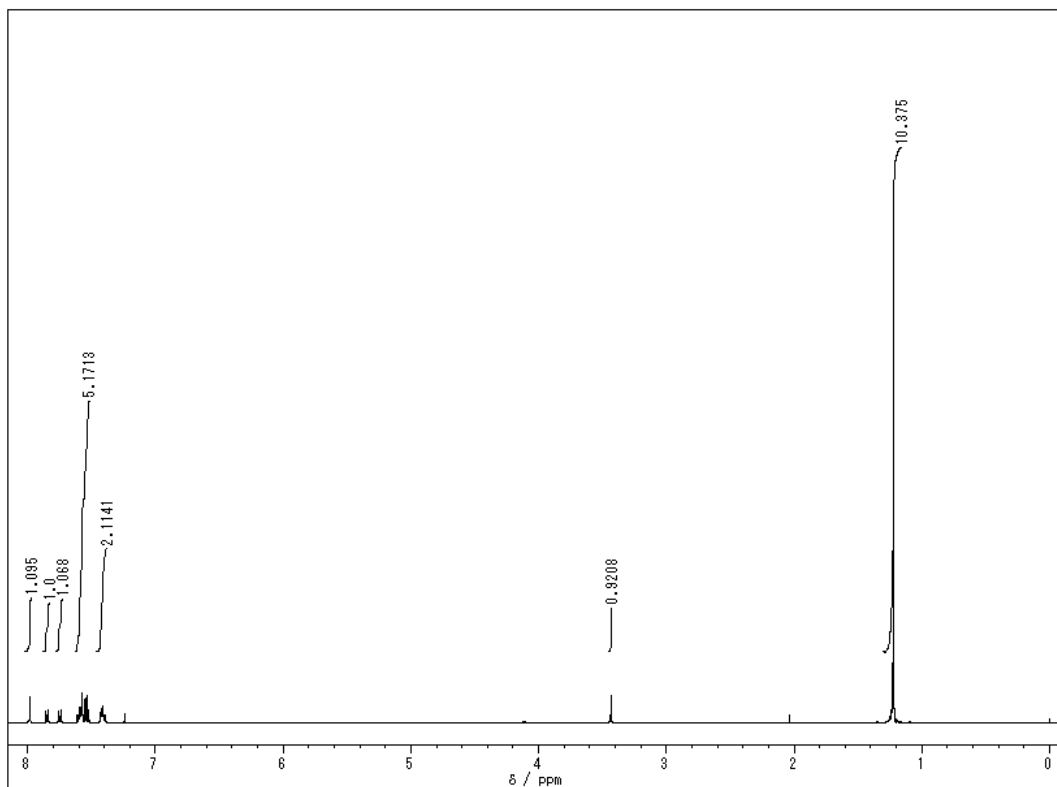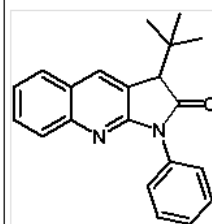

ObsName 4h  
ObsFreq 500.0 MHz  
Solvent CDCl<sub>3</sub>

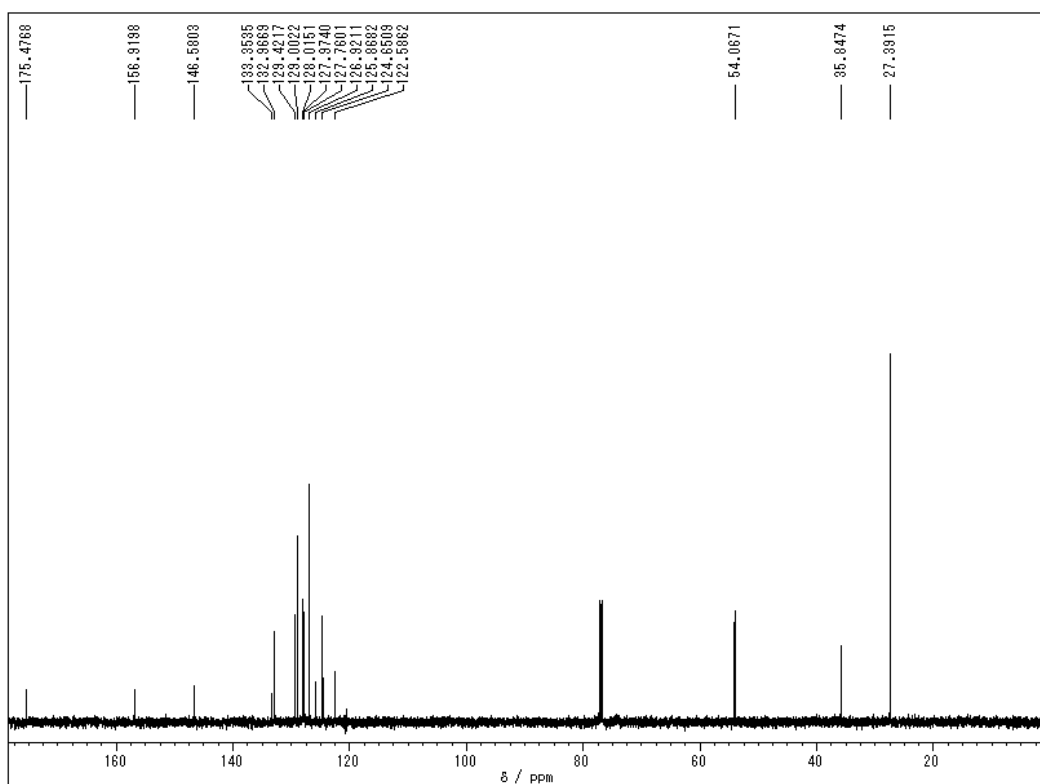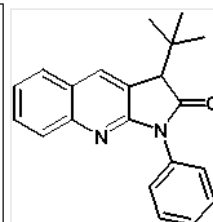

ObsName 13c  
ObsFreq 125.65 MHz  
Solvent CDCl<sub>3</sub>

15m

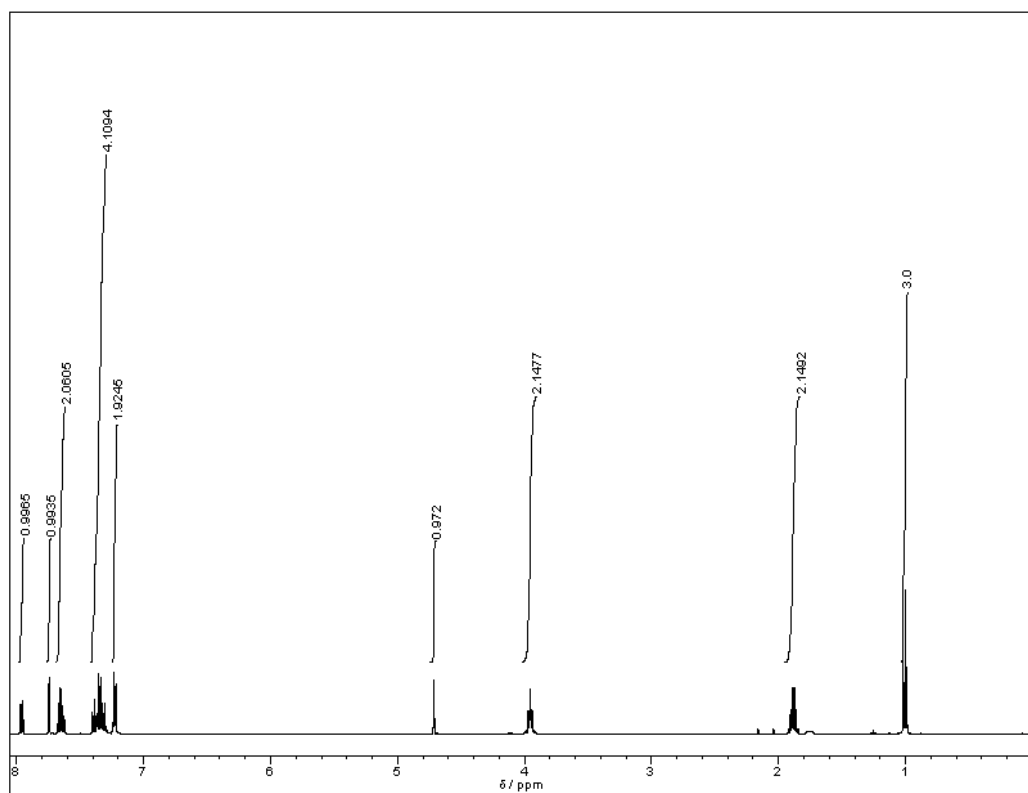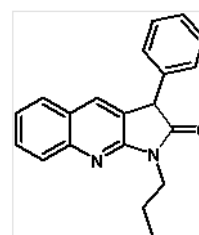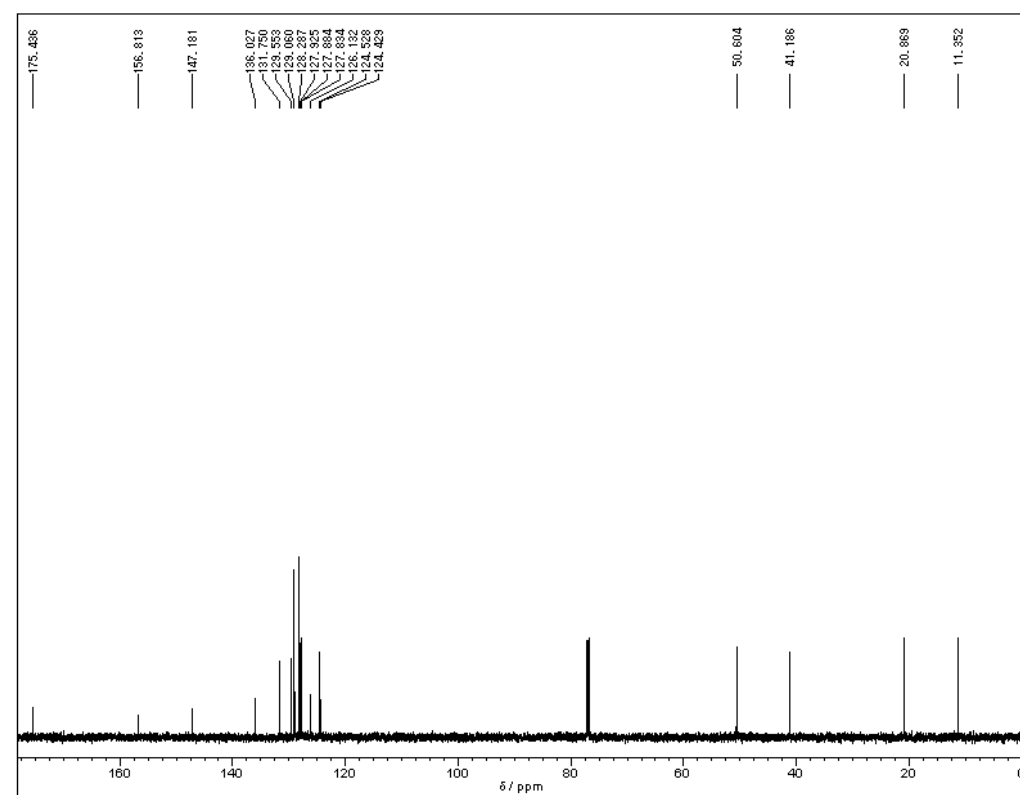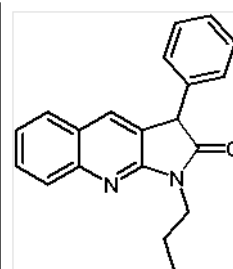



15n

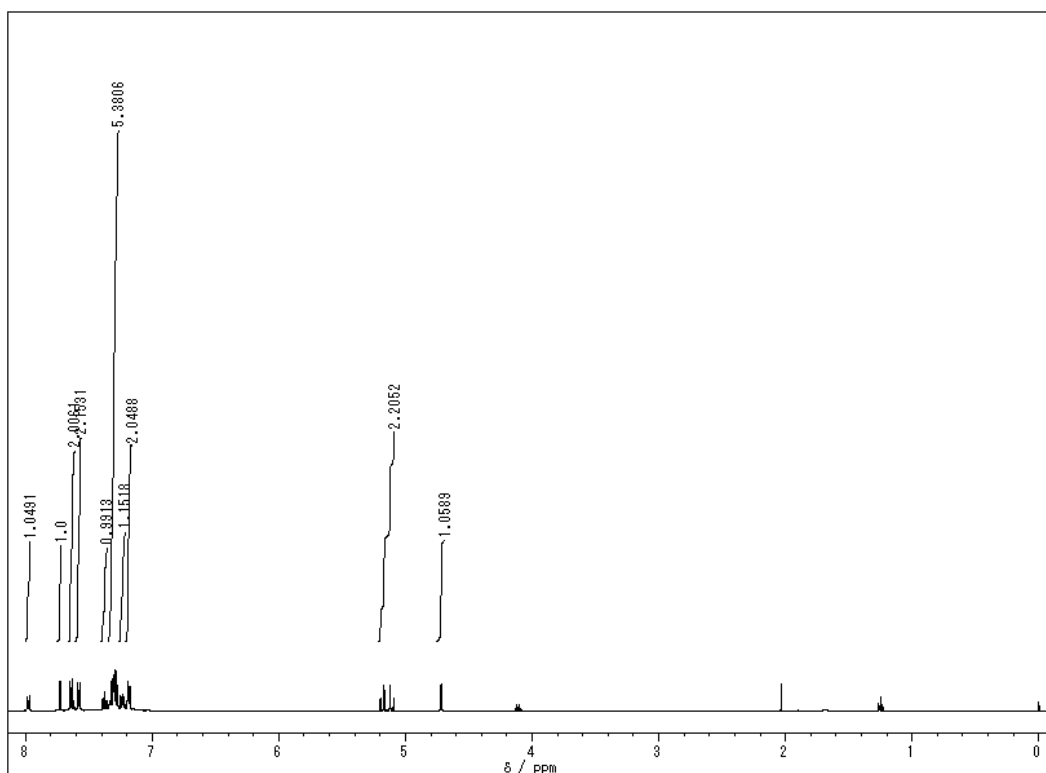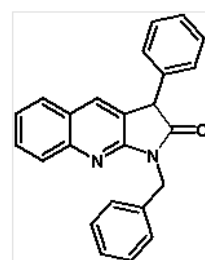

ObsName 15n  
ObsFreq 500.0 MHz  
Solvent CDCl<sub>3</sub>

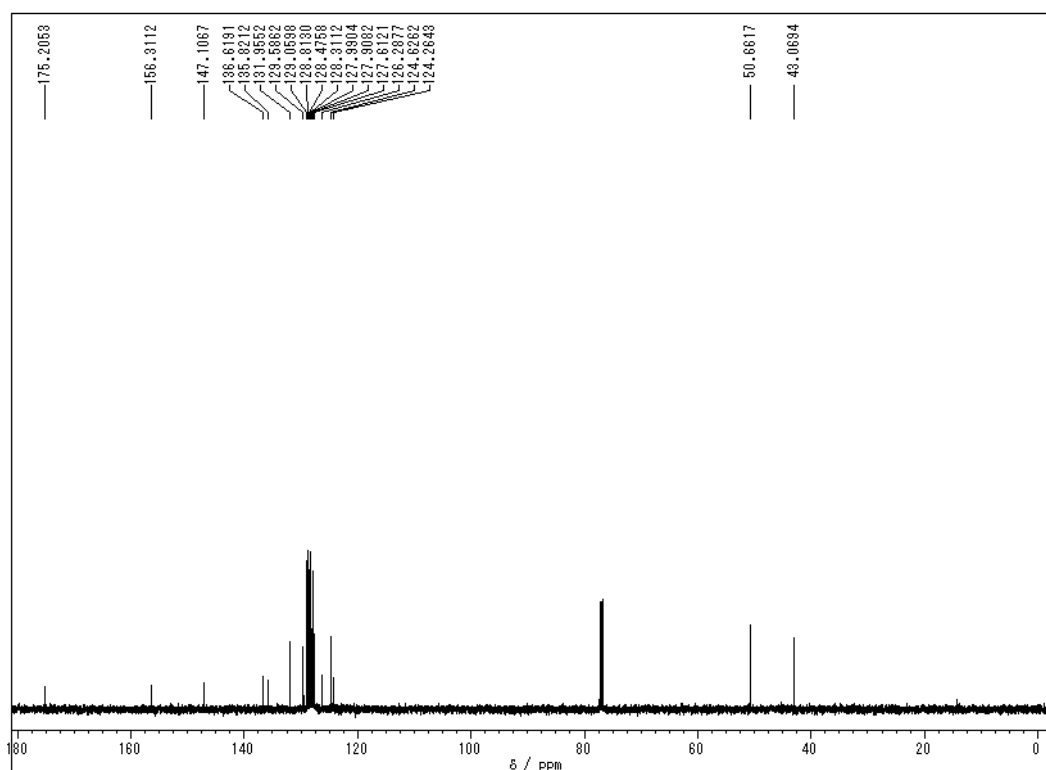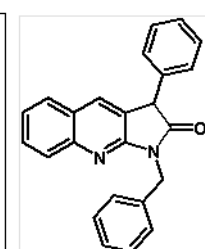

ObsName 15n  
ObsFreq 125.65 MHz  
Solvent CDCl<sub>3</sub>

150

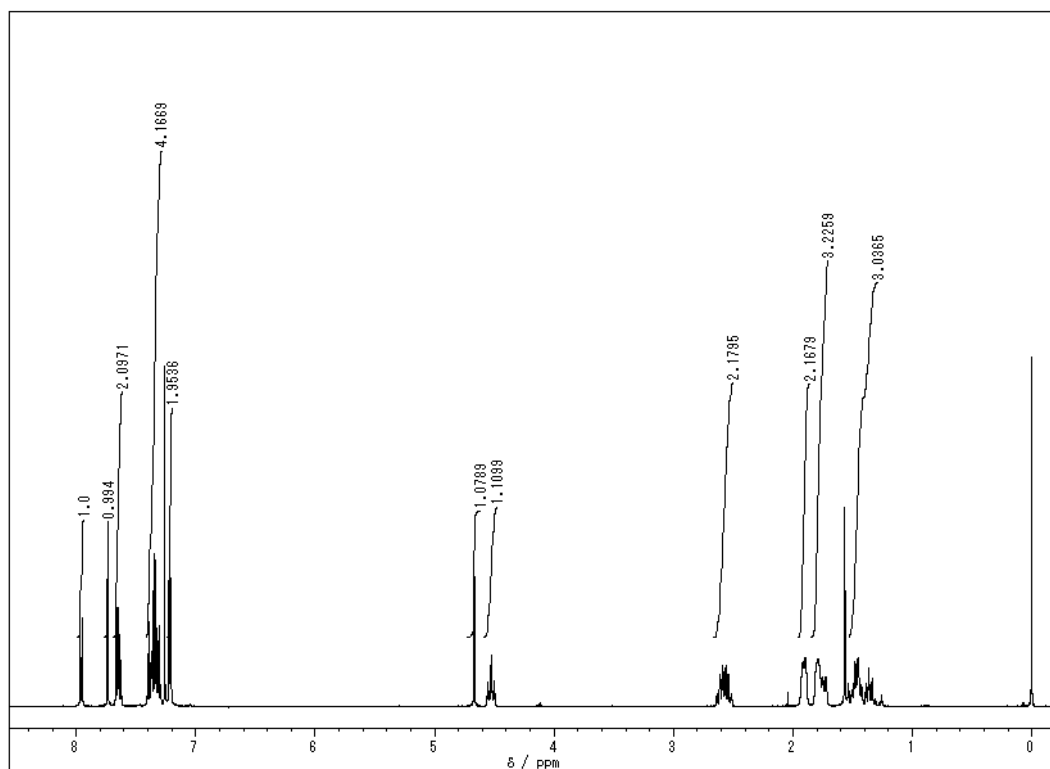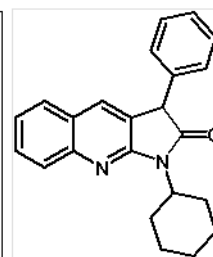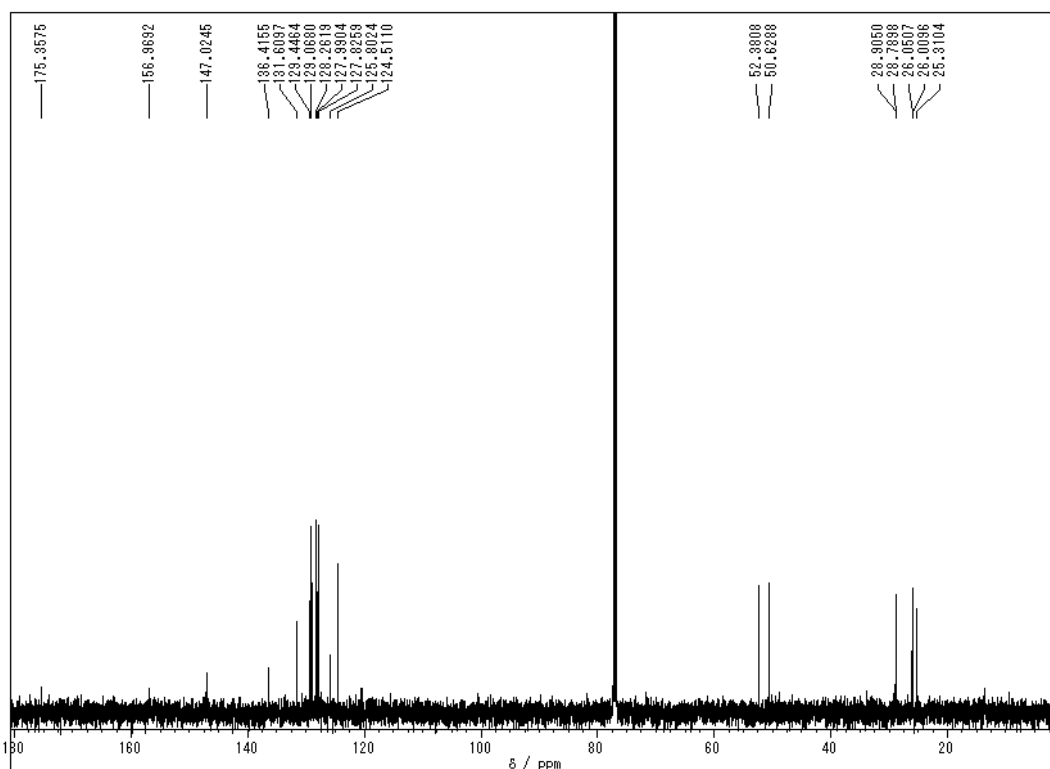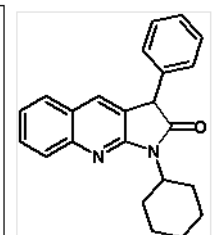

15p

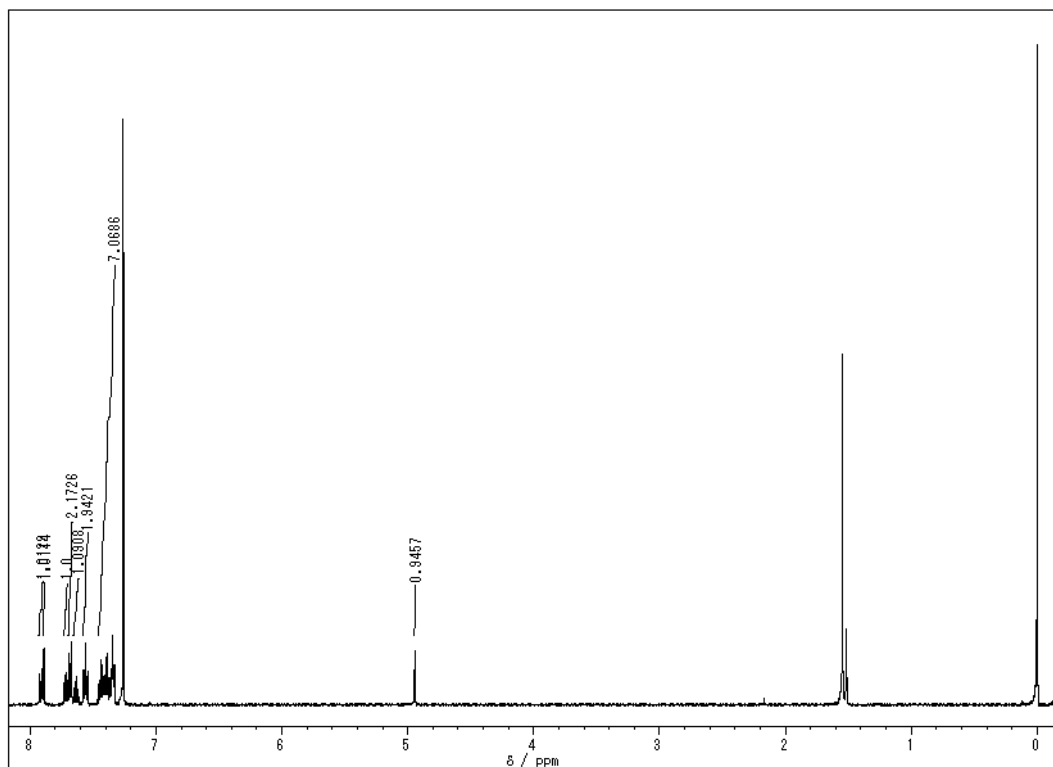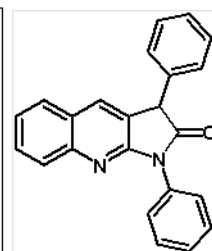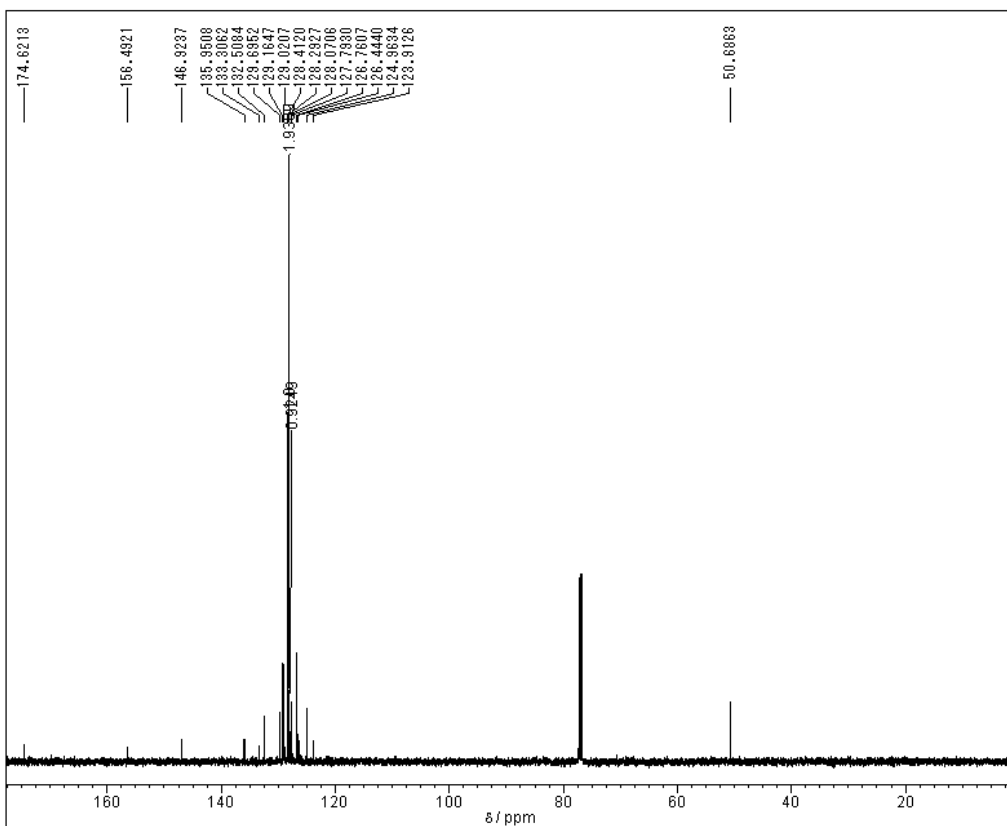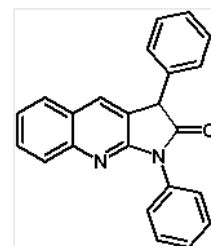

15q

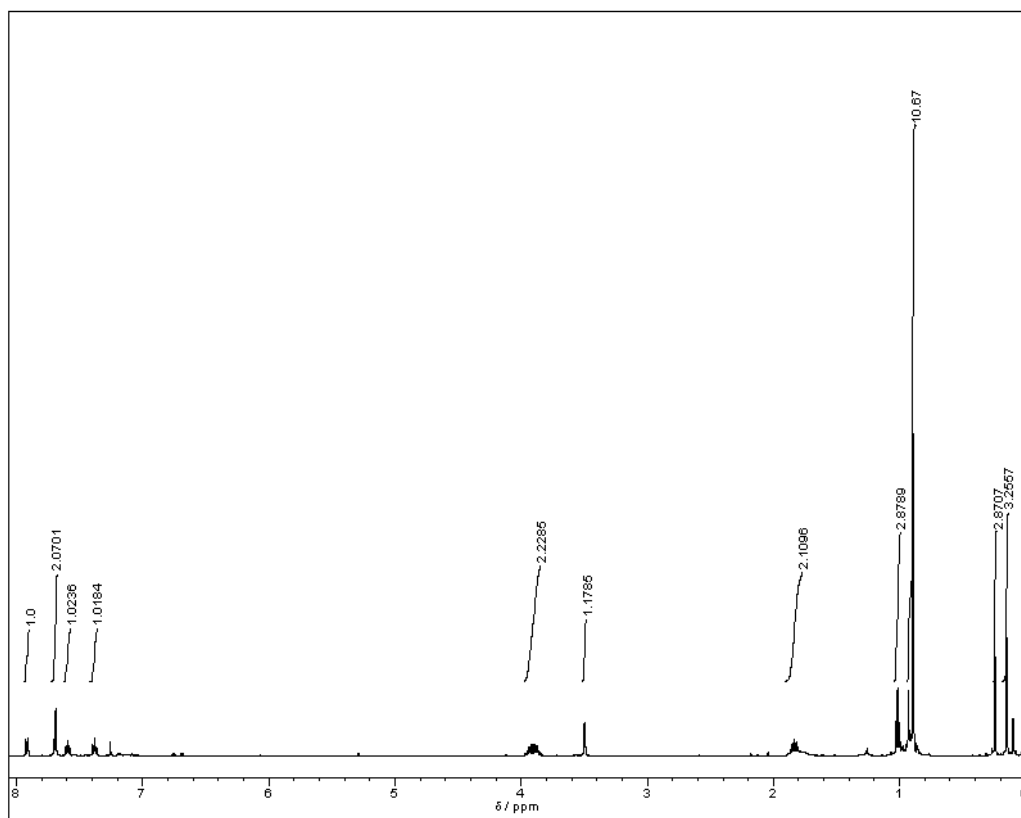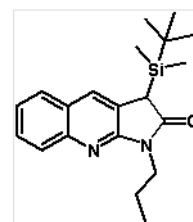

ObsNuc <sup>1</sup>H  
ObsFreq 500.0 MHz  
Solvent CDCl<sub>3</sub>

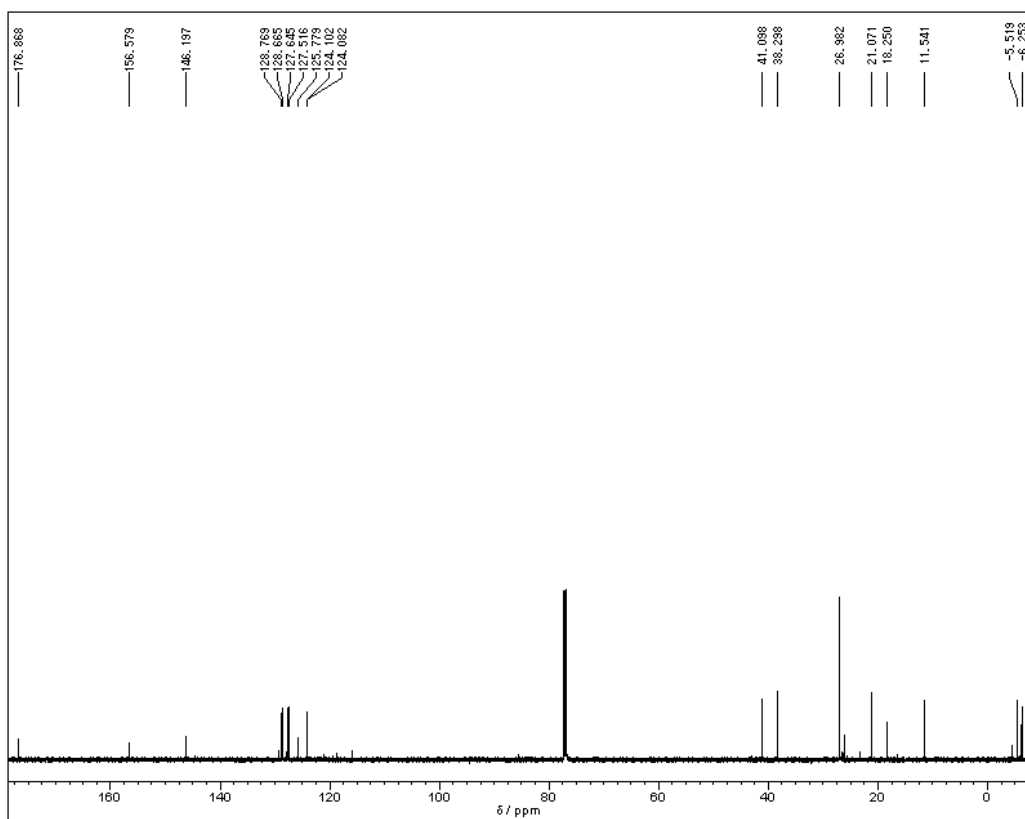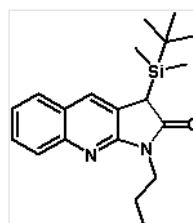

ObsNuc <sup>13</sup>C  
ObsFreq 150.9 MHz  
Solvent CDCl<sub>3</sub>

15r

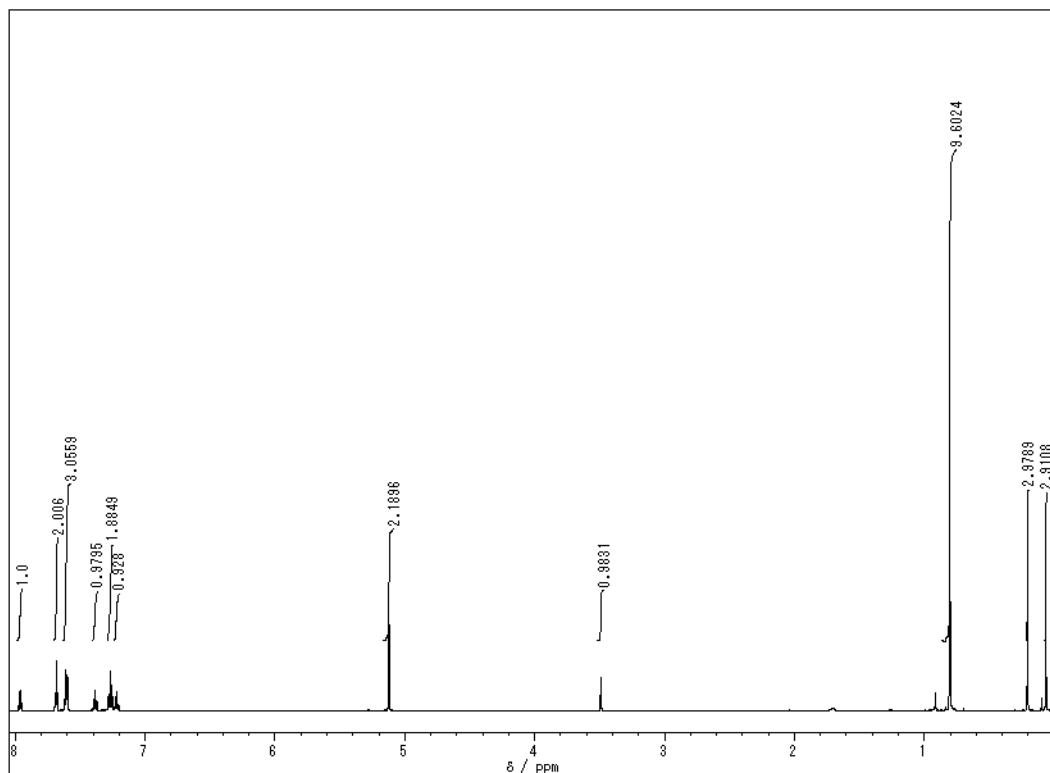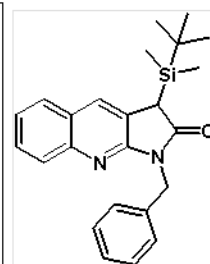

ObsNuc <sup>1</sup>H  
ObsFreq 600.13 MHz  
Solvent CD<sub>2</sub>Cl<sub>2</sub>

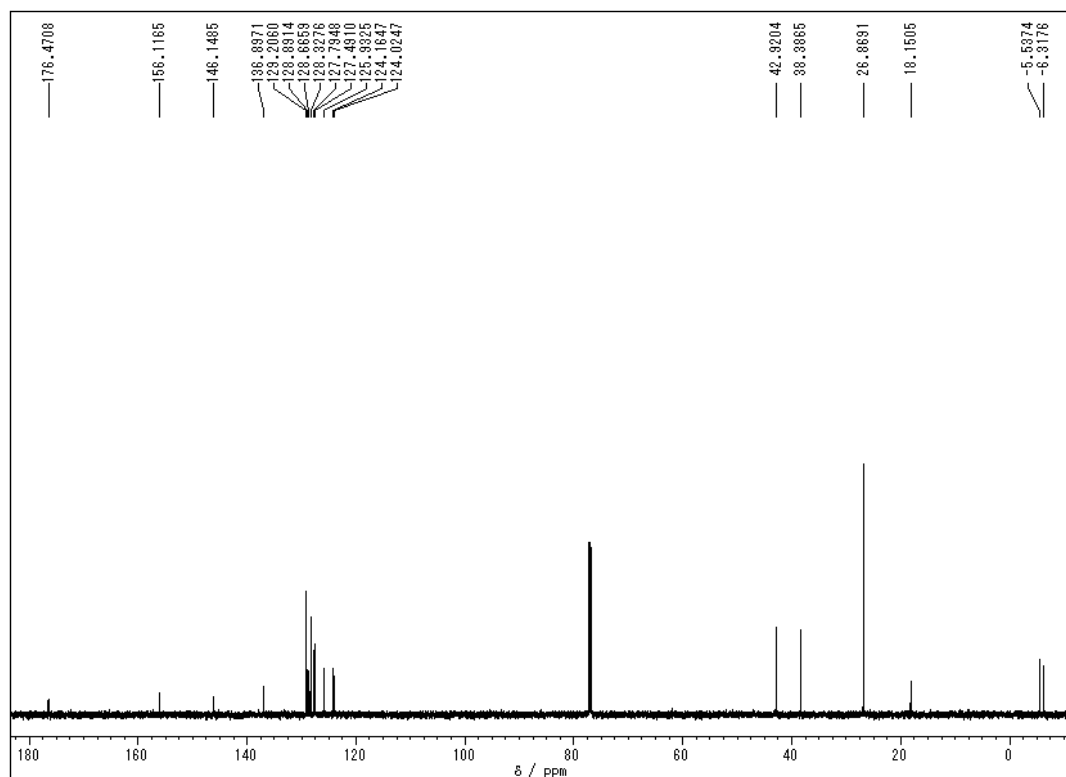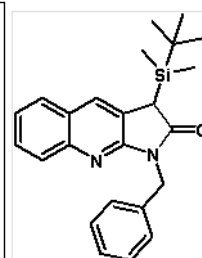

ObsNuc <sup>13</sup>C  
ObsFreq 150.9 MHz  
Solvent CDCl<sub>3</sub>

15s

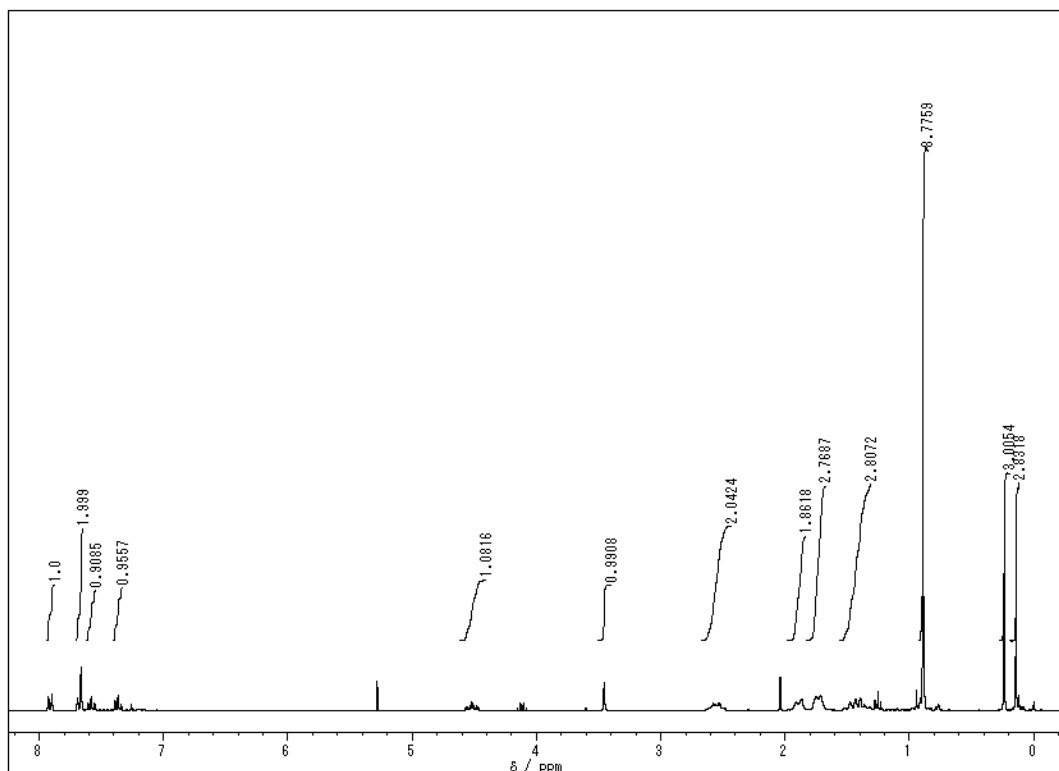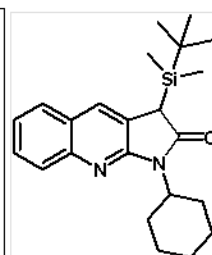

ObsNuc: <sup>1</sup>H  
ObsFreq: 300.01 MHz  
Solvent: CDCl<sub>3</sub>

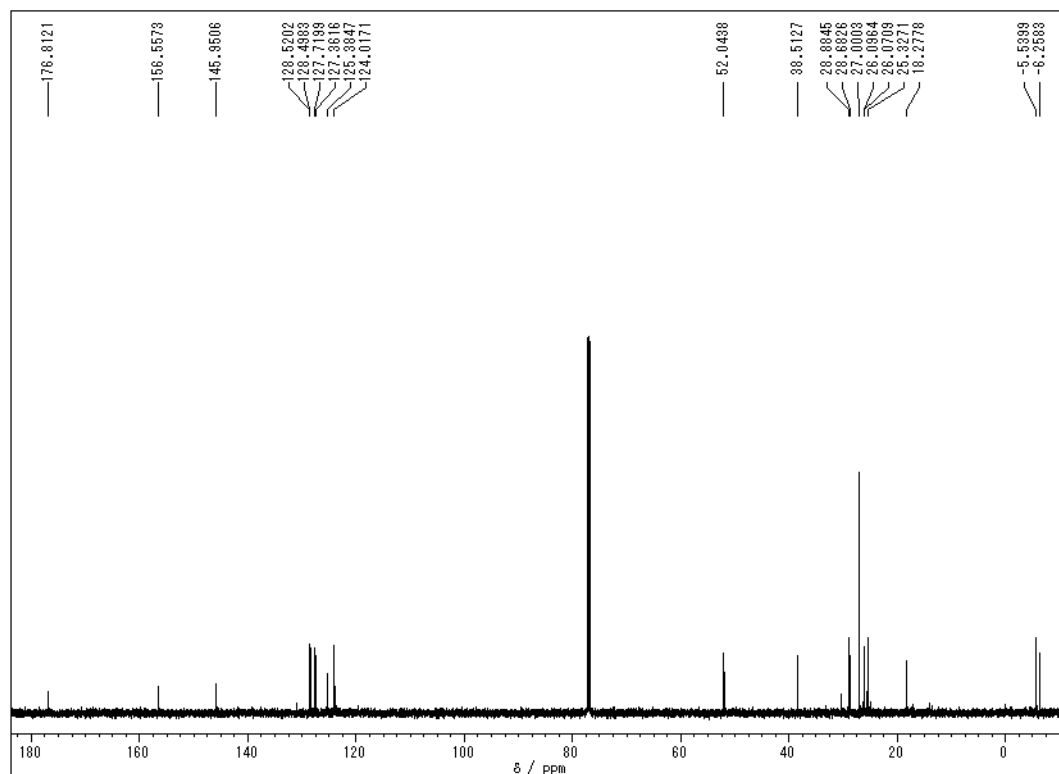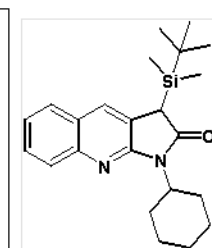

ObsNuc: <sup>13</sup>C  
ObsFreq: 150.9 MHz  
Solvent: CDCl<sub>3</sub>

15t

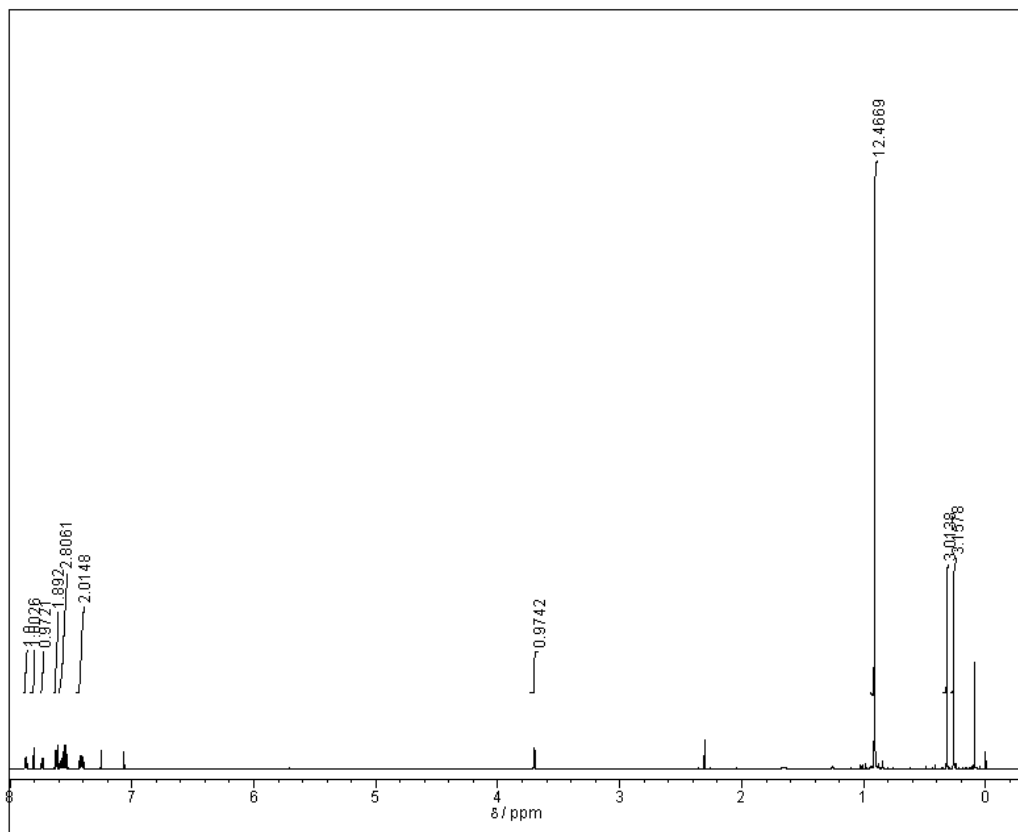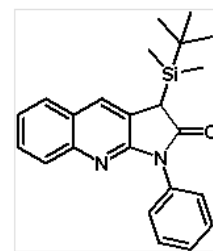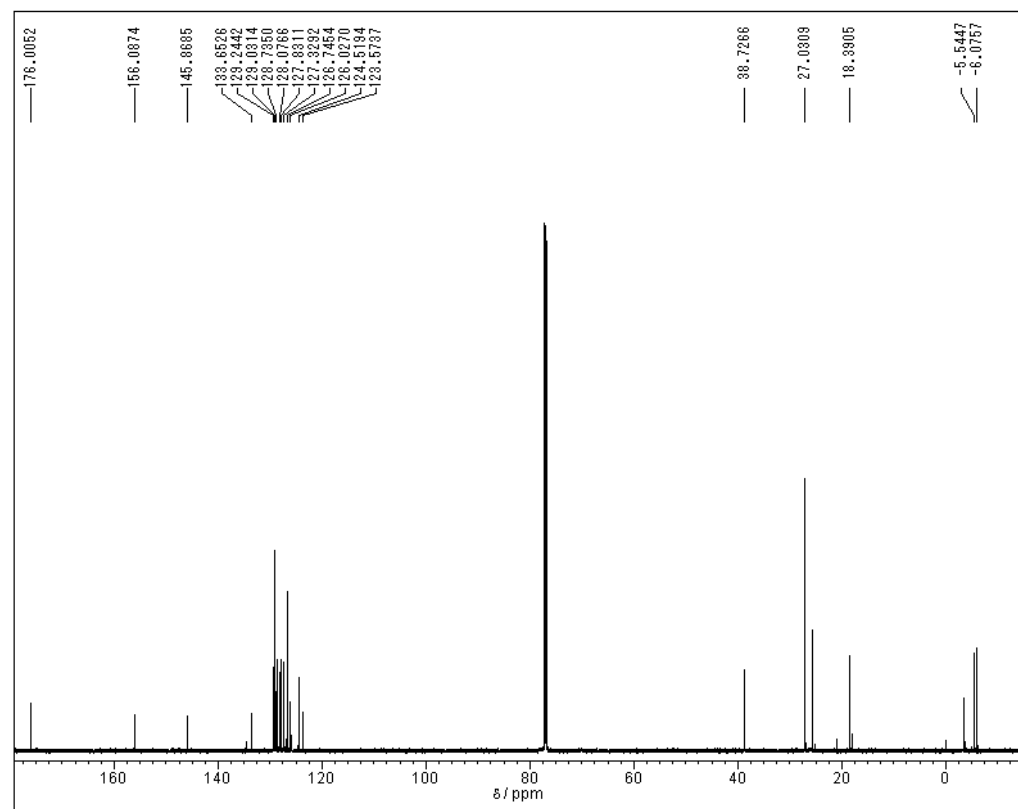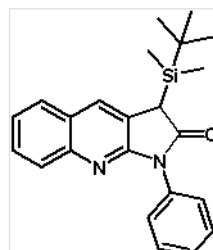

15u

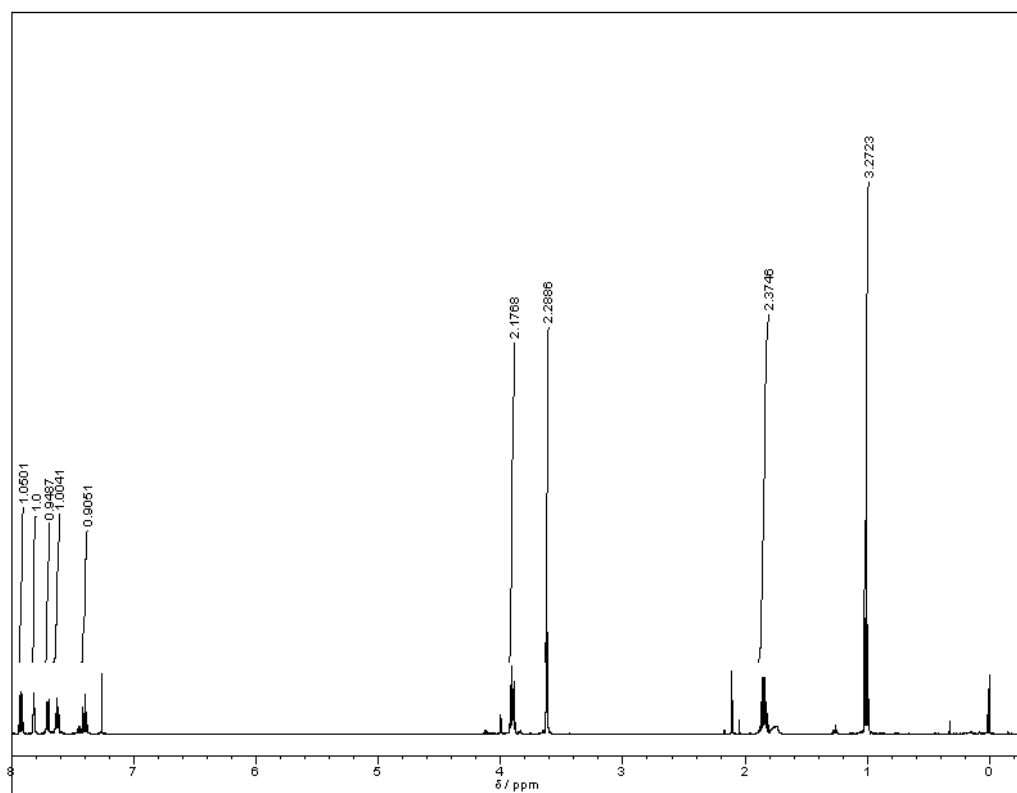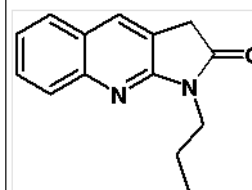

ObsNuc <sup>1</sup>H  
ObsFreq 500.0 MHz  
Solvent CDCl<sub>3</sub>

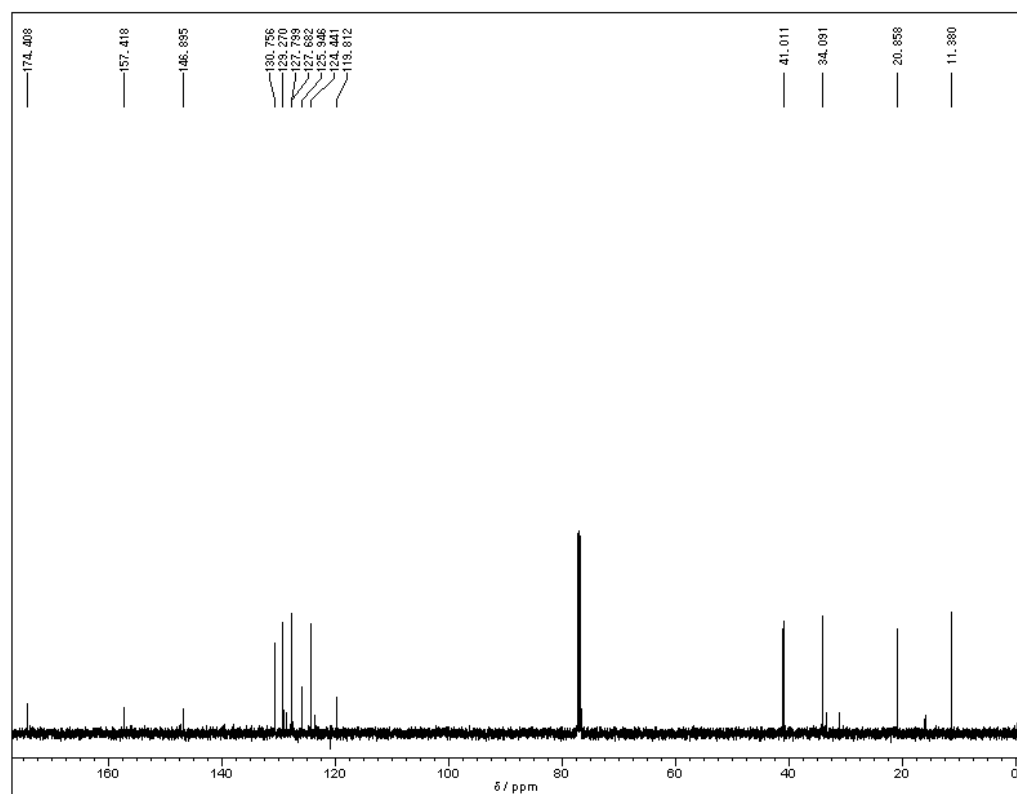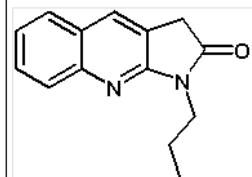

ObsNuc <sup>13</sup>C  
ObsFreq 125.65 MHz  
Solvent CDCl<sub>3</sub>



17a

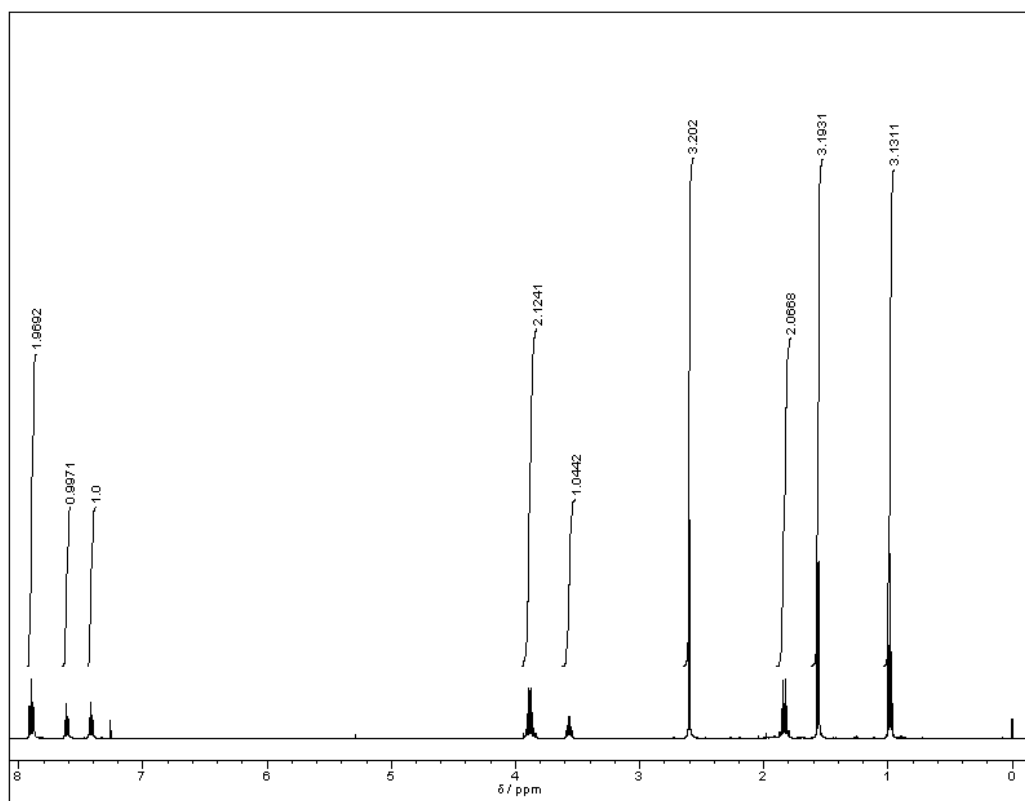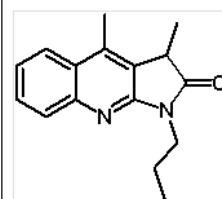

ObsNuc <sup>1</sup>H  
ObsFreq 500.0 MHz  
Solvent CDCl<sub>3</sub>

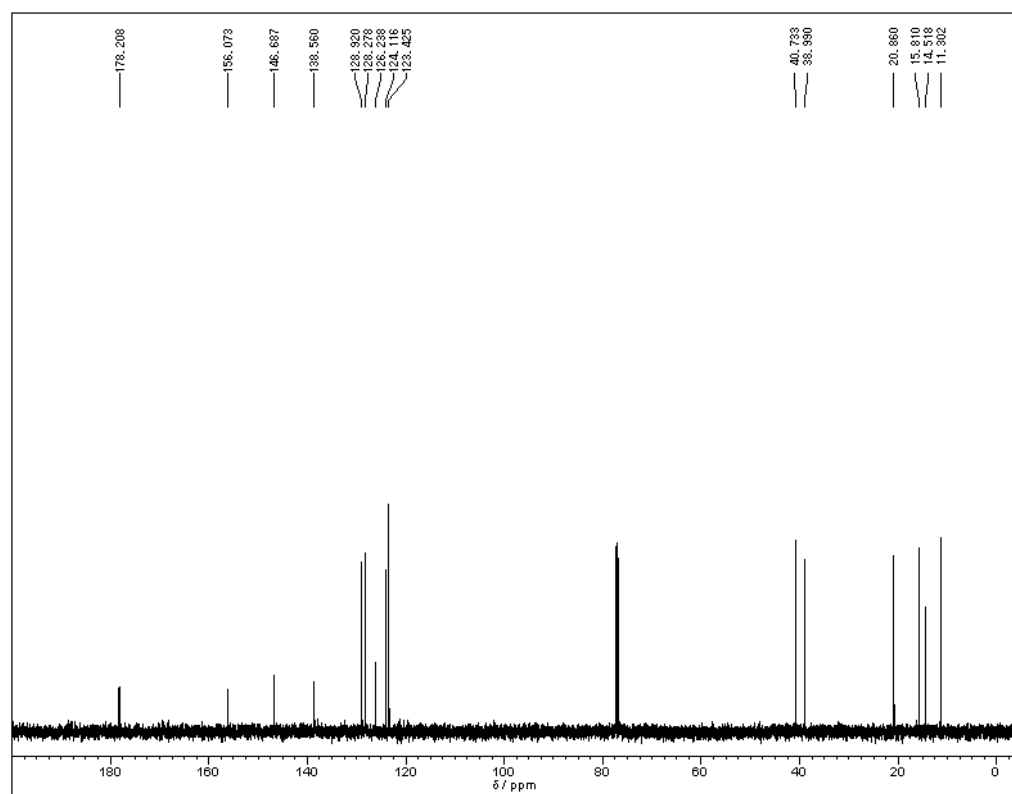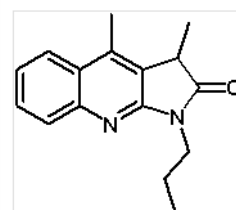

ObsNuc <sup>13</sup>C  
ObsFreq 125.85 MHz  
Solvent CDCl<sub>3</sub>

17b

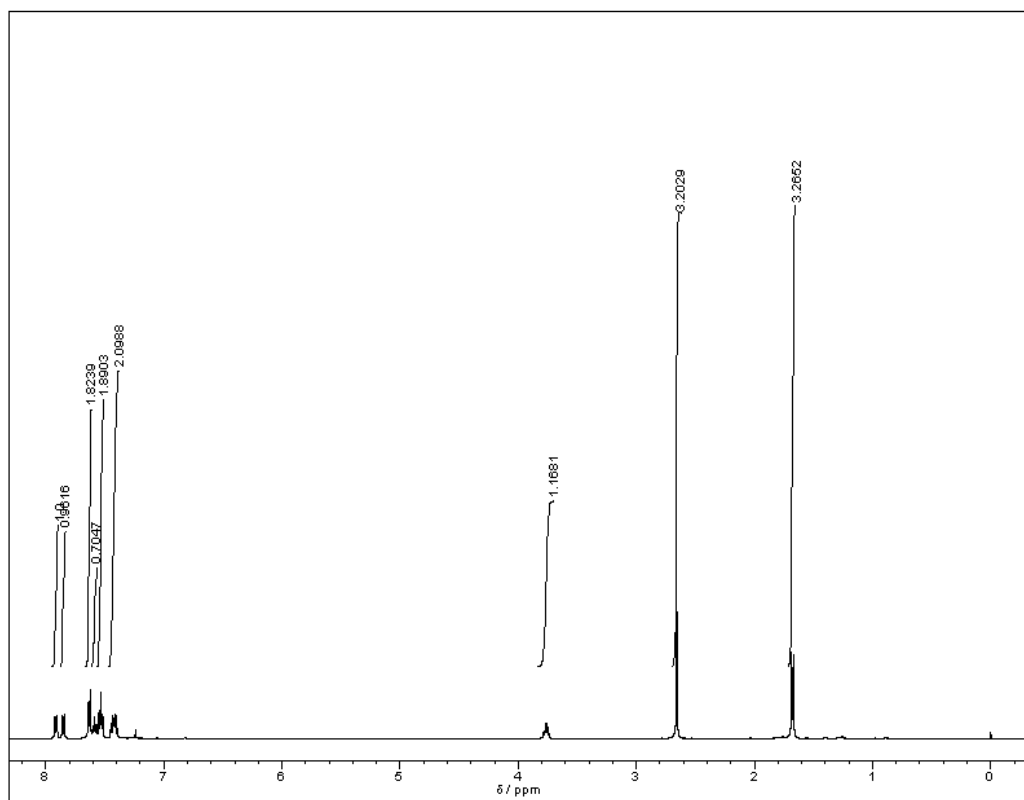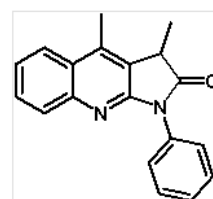

ObsNuc <sup>1</sup>H  
ObsFreq 500.0 MHz  
Solvent CDCl<sub>3</sub>

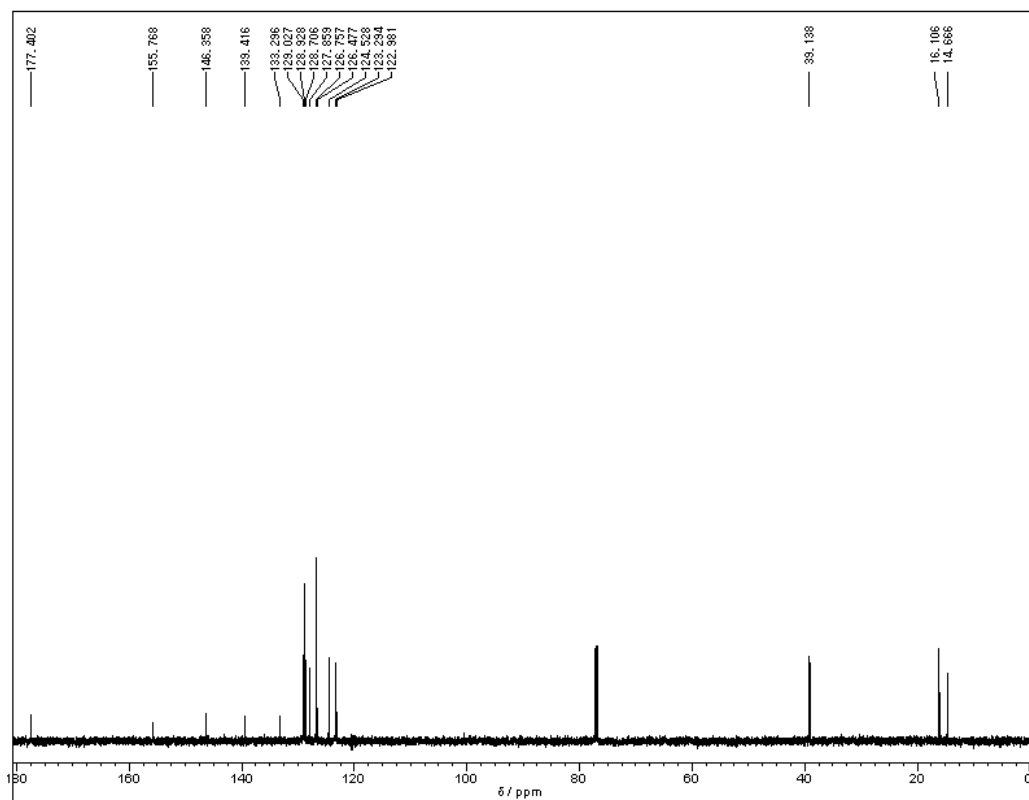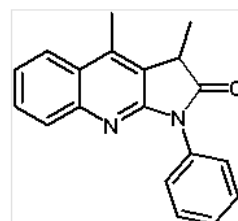

ObsNuc <sup>13</sup>C  
ObsFreq 125.65 MHz  
Solvent CDCl<sub>3</sub>

17c

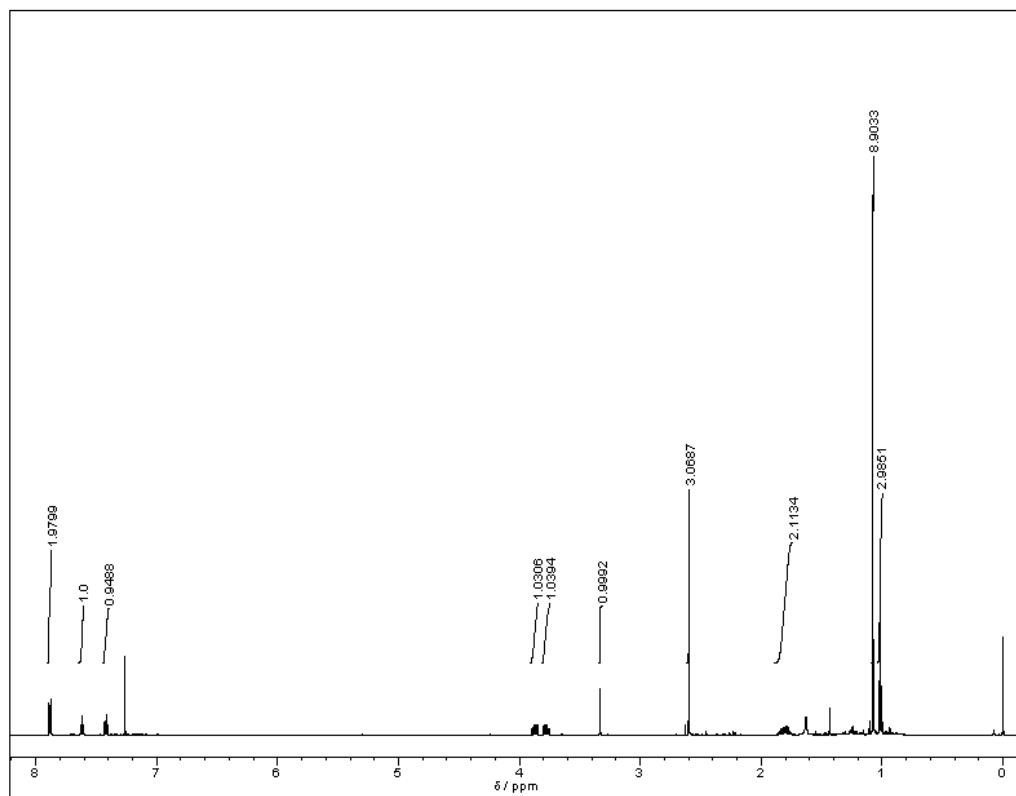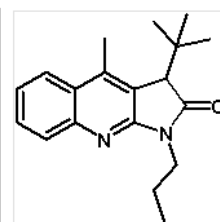

ObsNuc <sup>1</sup>H  
ObsFreq 600.13 MHz  
Solvent CDCl<sub>3</sub>

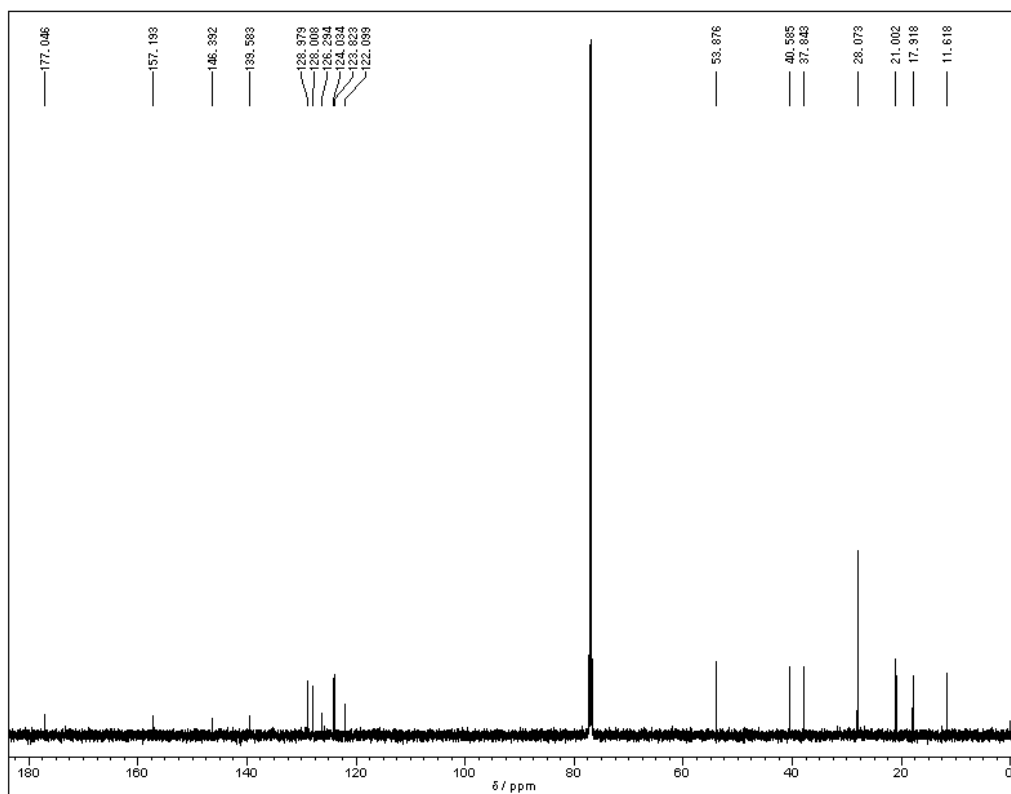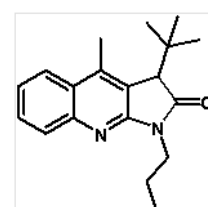

ObsNuc <sup>13</sup>C  
ObsFreq 150.9 MHz  
Solvent CDCl<sub>3</sub>

18a

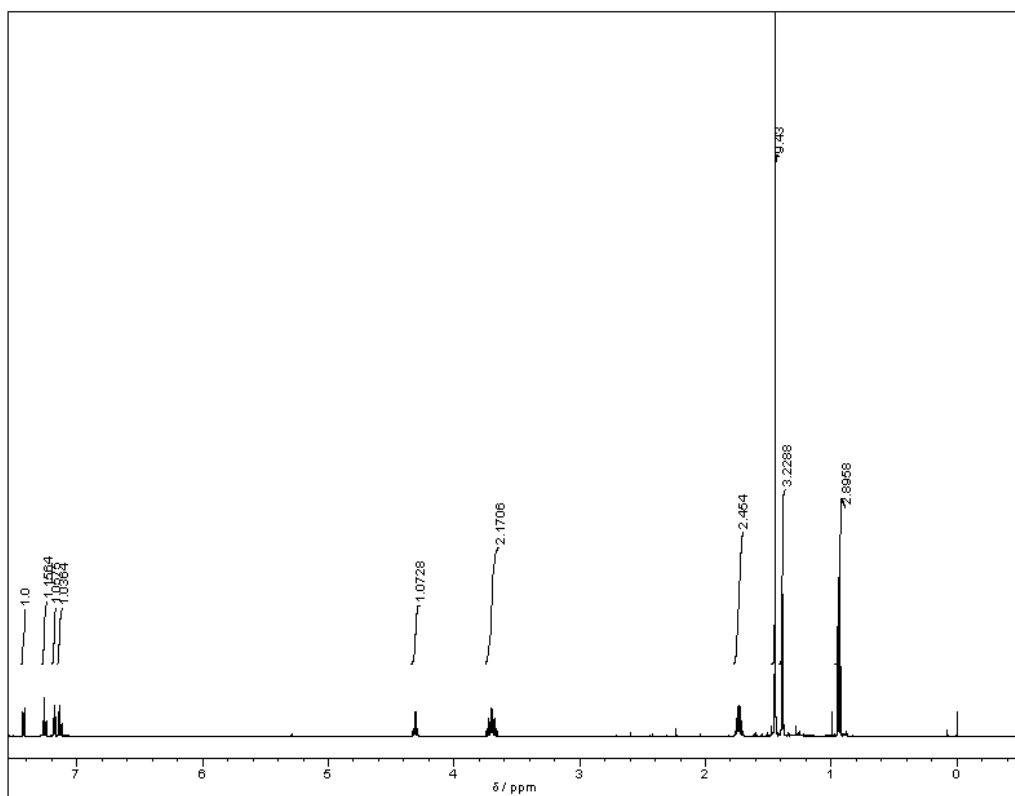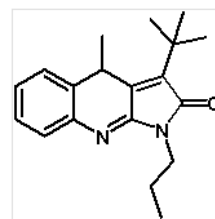

ObsNuc <sup>1</sup>H  
ObsFreq 800.13 MHz  
Solvent CDCl<sub>3</sub>

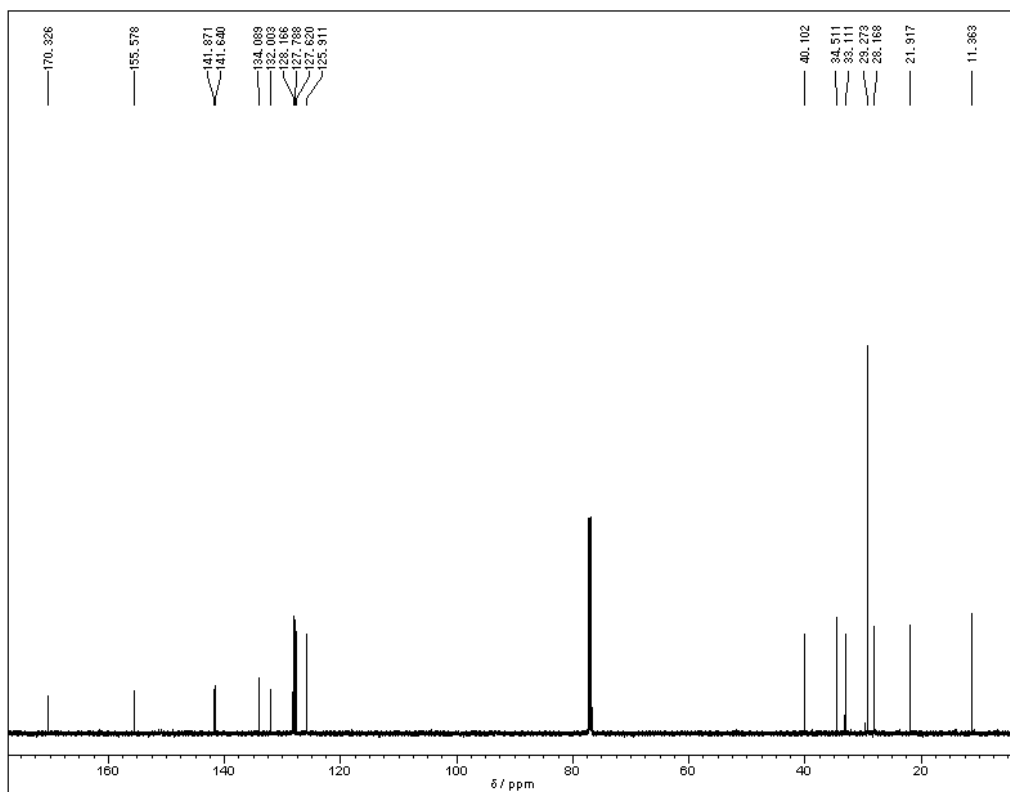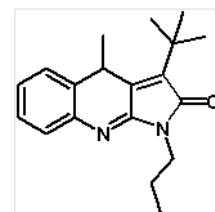

ObsNuc <sup>13</sup>C  
ObsFreq 150.9 MHz  
Solvent CDCl<sub>3</sub>



18b

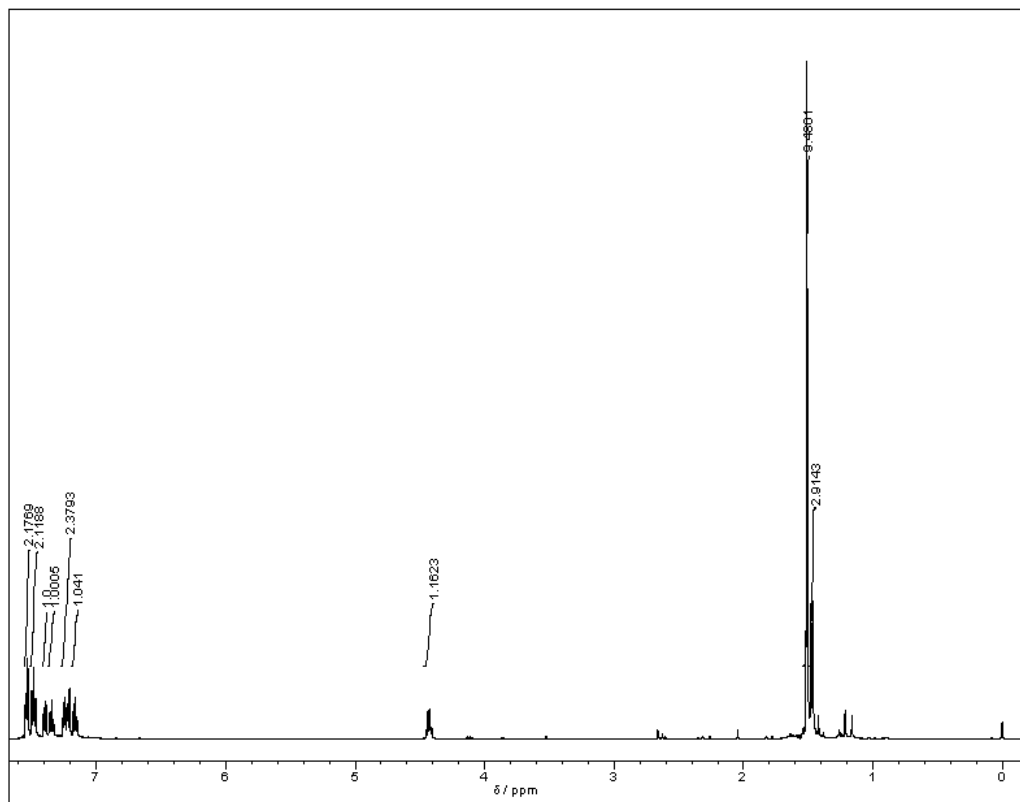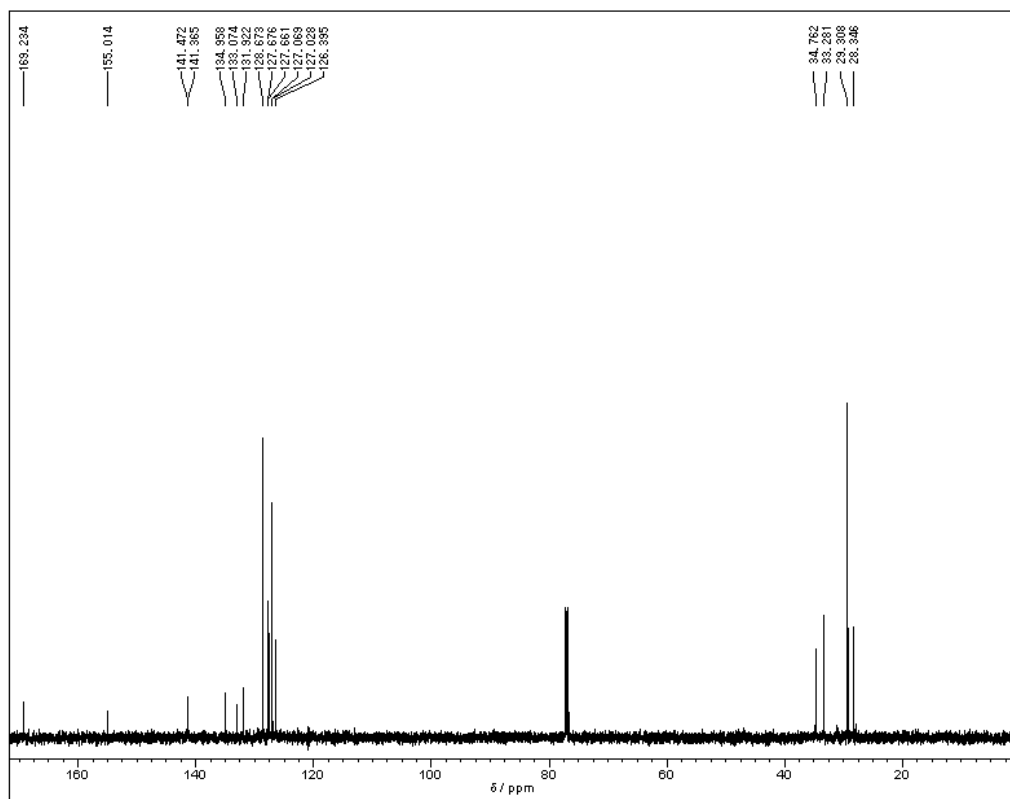

17e

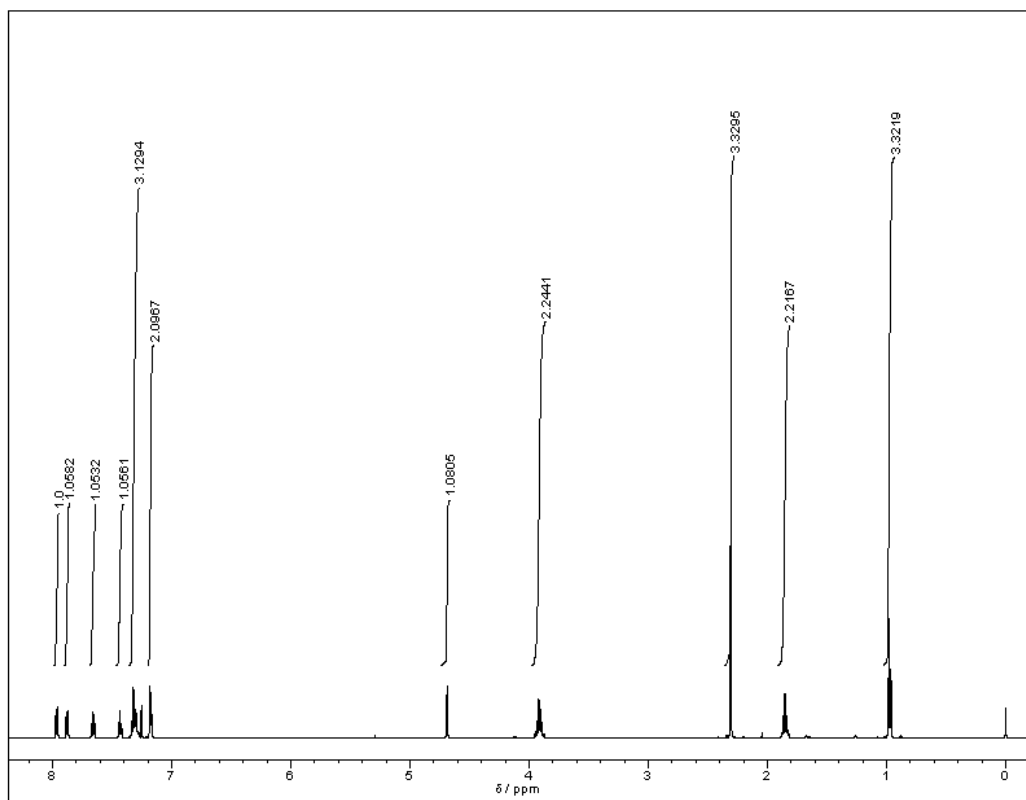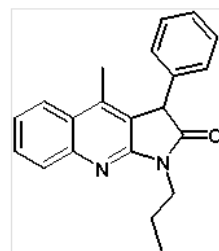

ObsNuc  $^1\text{H}$   
ObsFreq 600.13 MHz  
Solvent  $\text{CDCl}_3$

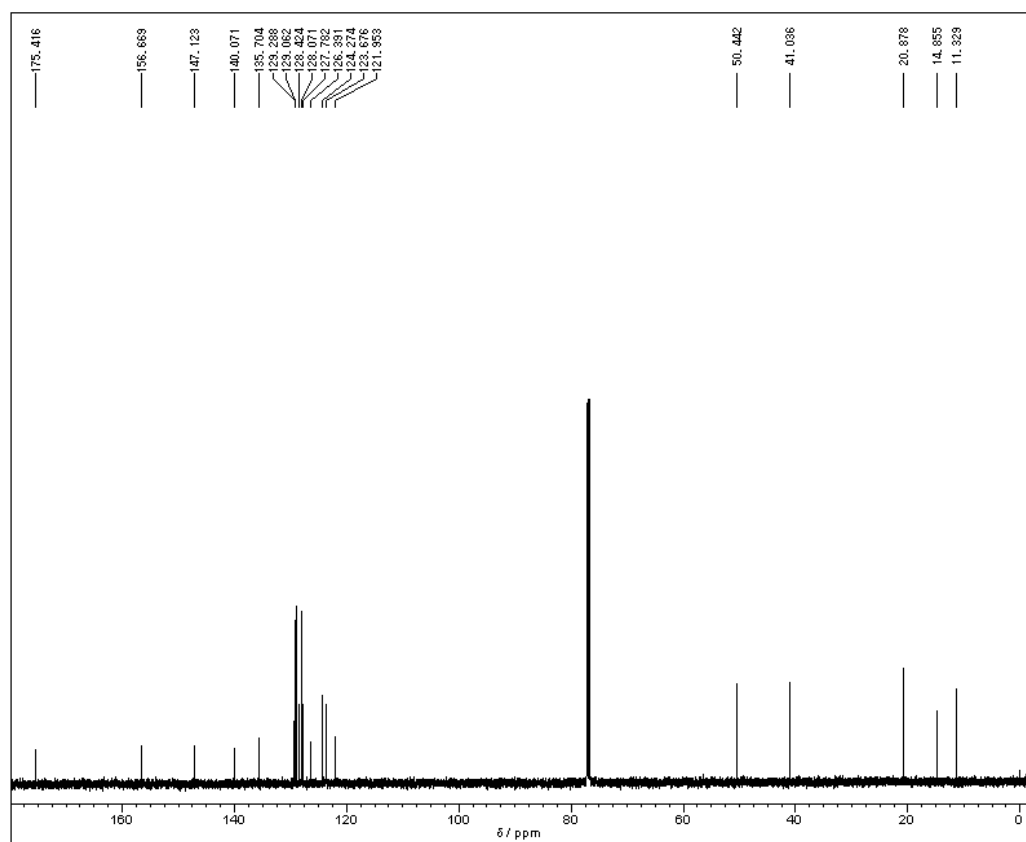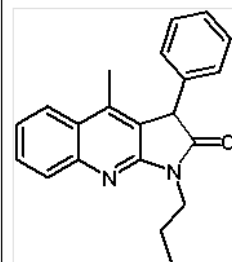

ObsNuc  $^{13}\text{C}$   
ObsFreq 150.9 MHz  
Solvent  $\text{CDCl}_3$

17f

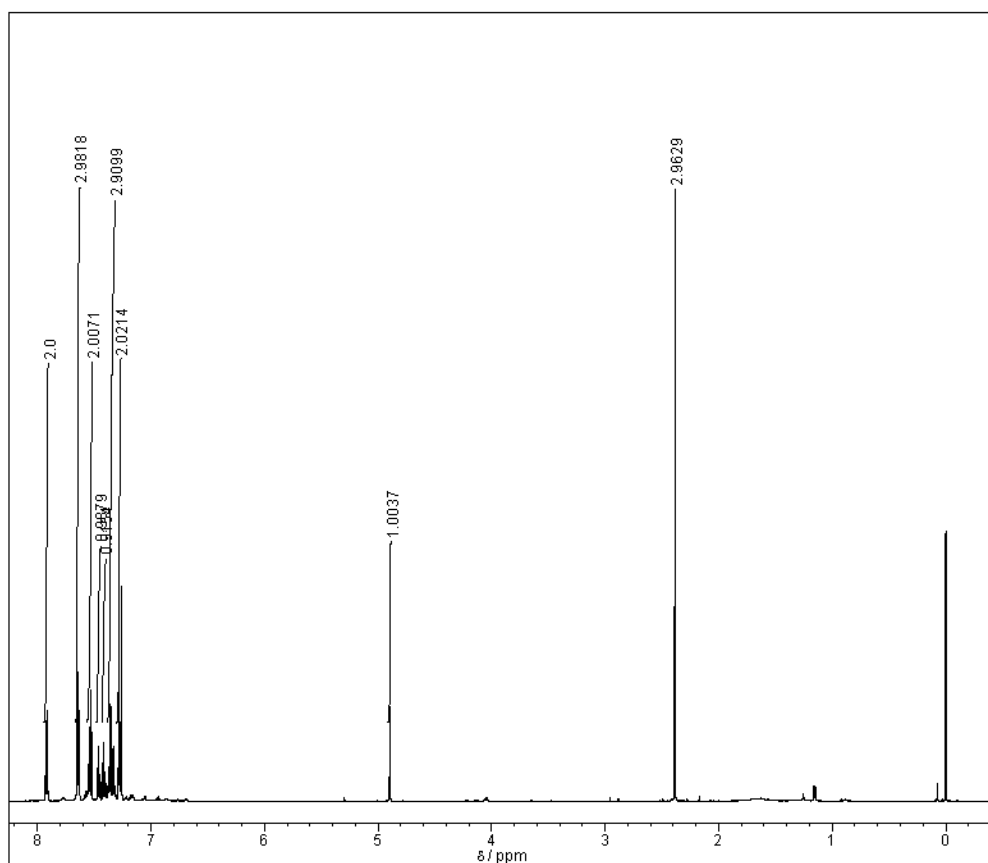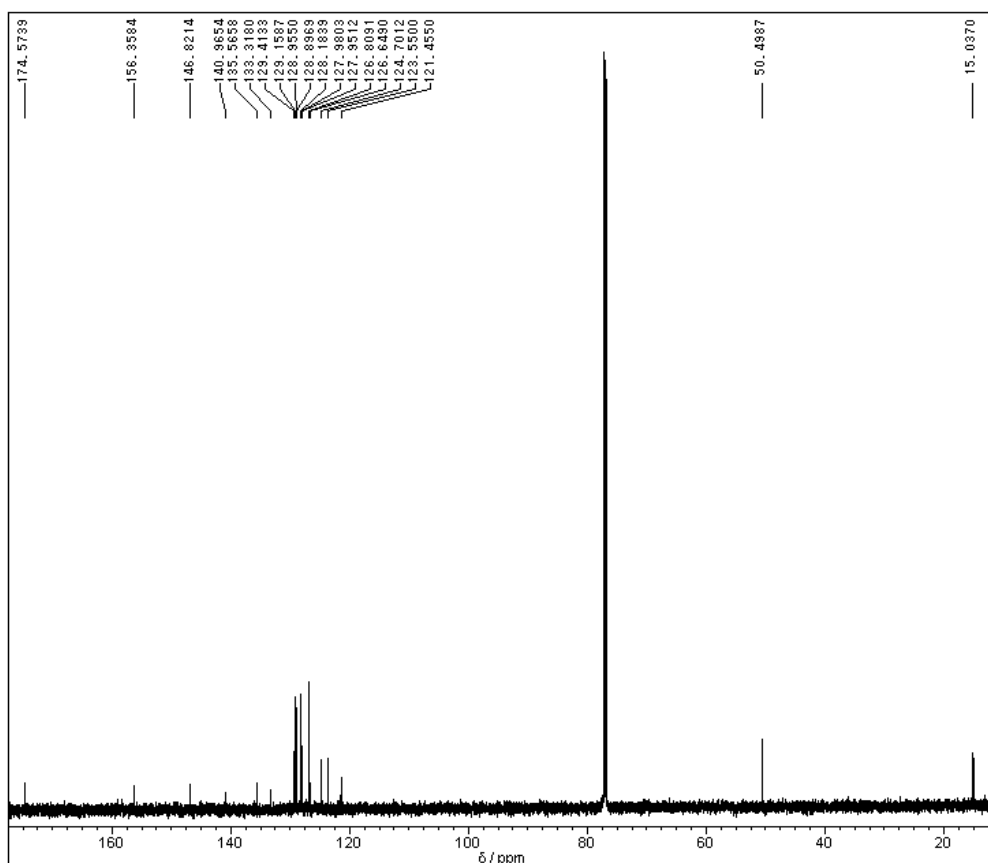



17g

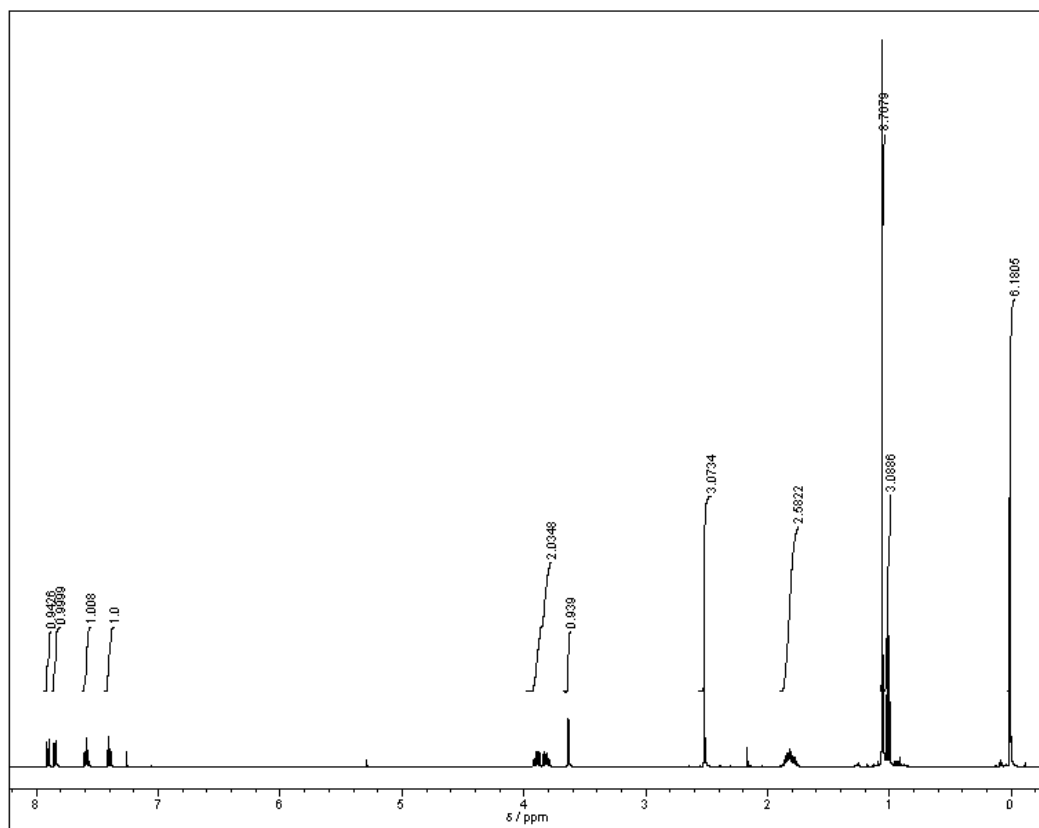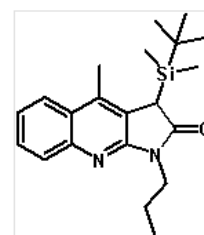

Obs Nuc <sup>1</sup>H  
Obs Freq 500.0 MHz  
Solvent CDCl<sub>3</sub>

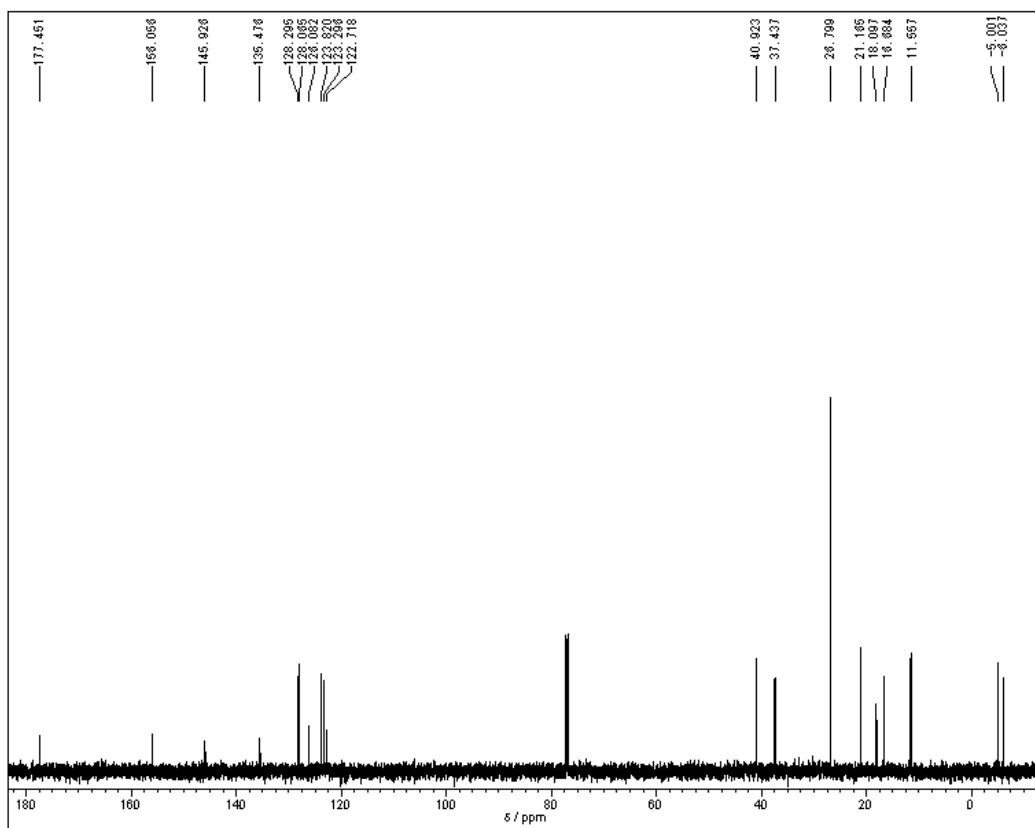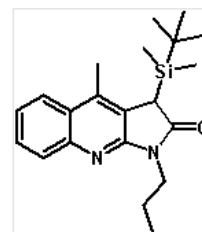

Obs Nuc <sup>13</sup>C  
Obs Freq 125.65 MHz  
Solvent CDCl<sub>3</sub>

17h

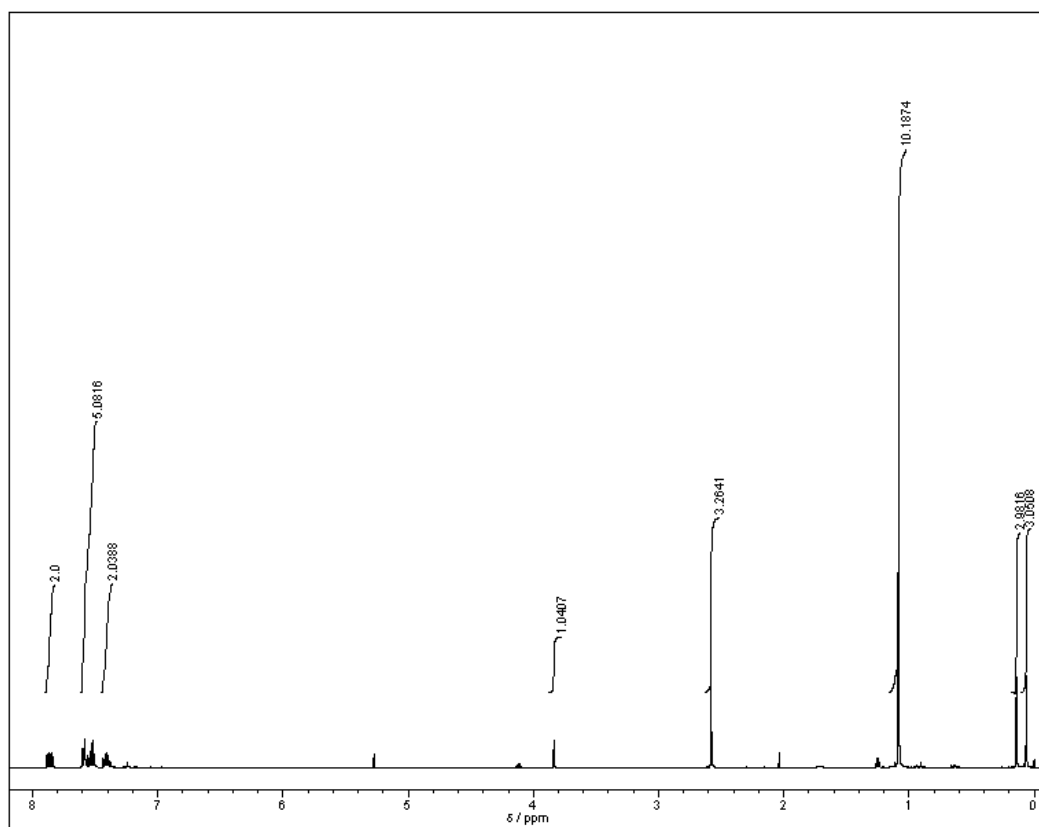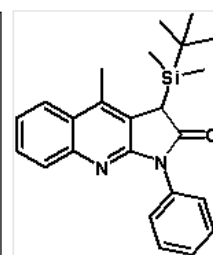

ObsNuc  $^1\text{H}$   
ObsFreq 500.0 MHz  
Solvent  $\text{CDCl}_3$

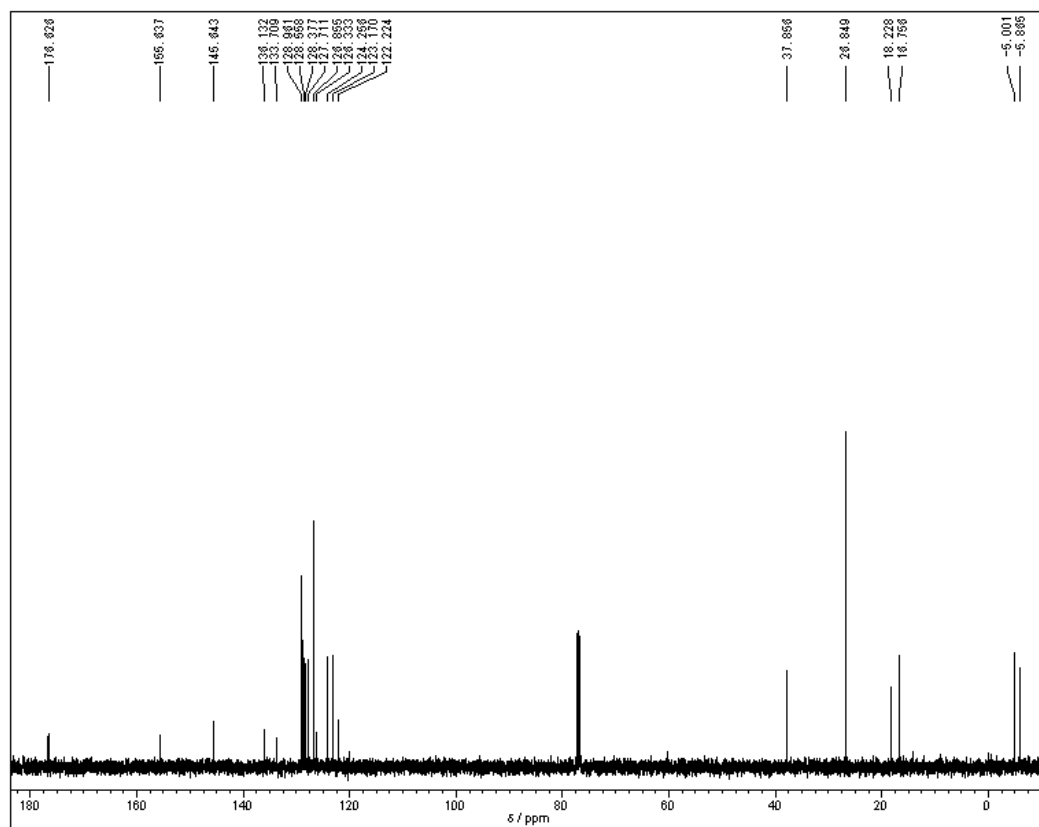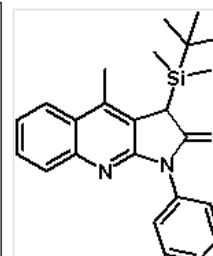

ObsNuc  $^{13}\text{C}$   
ObsFreq 125.66 MHz  
Solvent  $\text{CDCl}_3$

19a

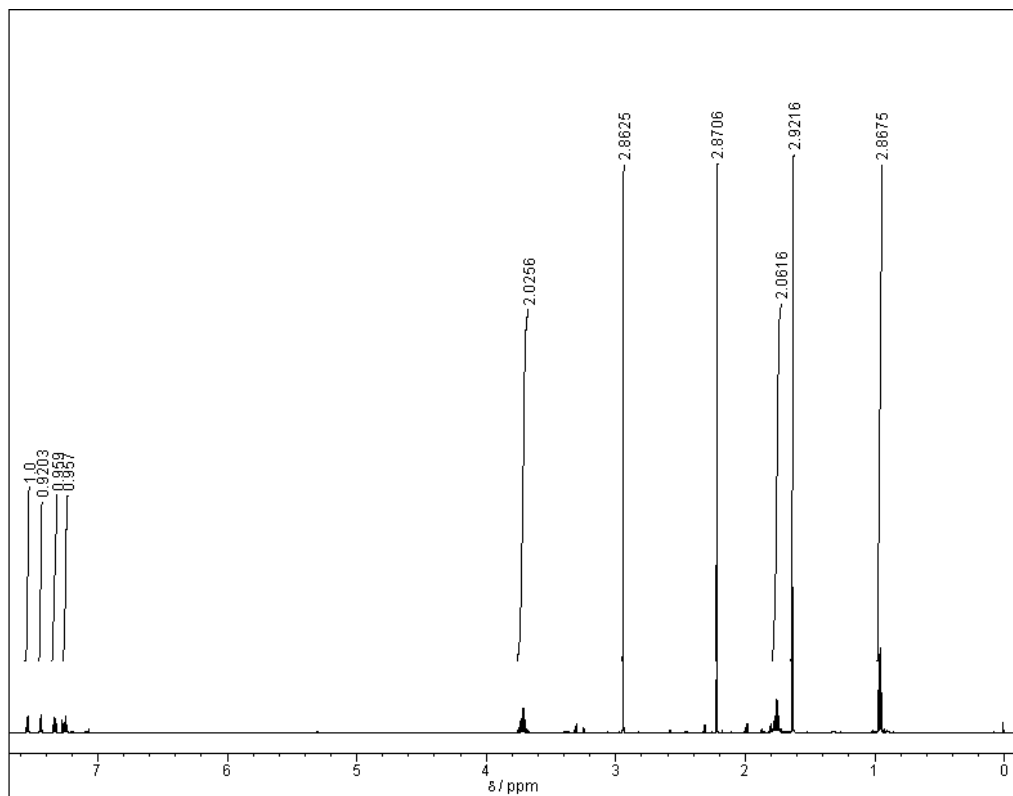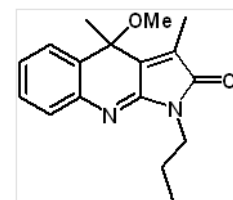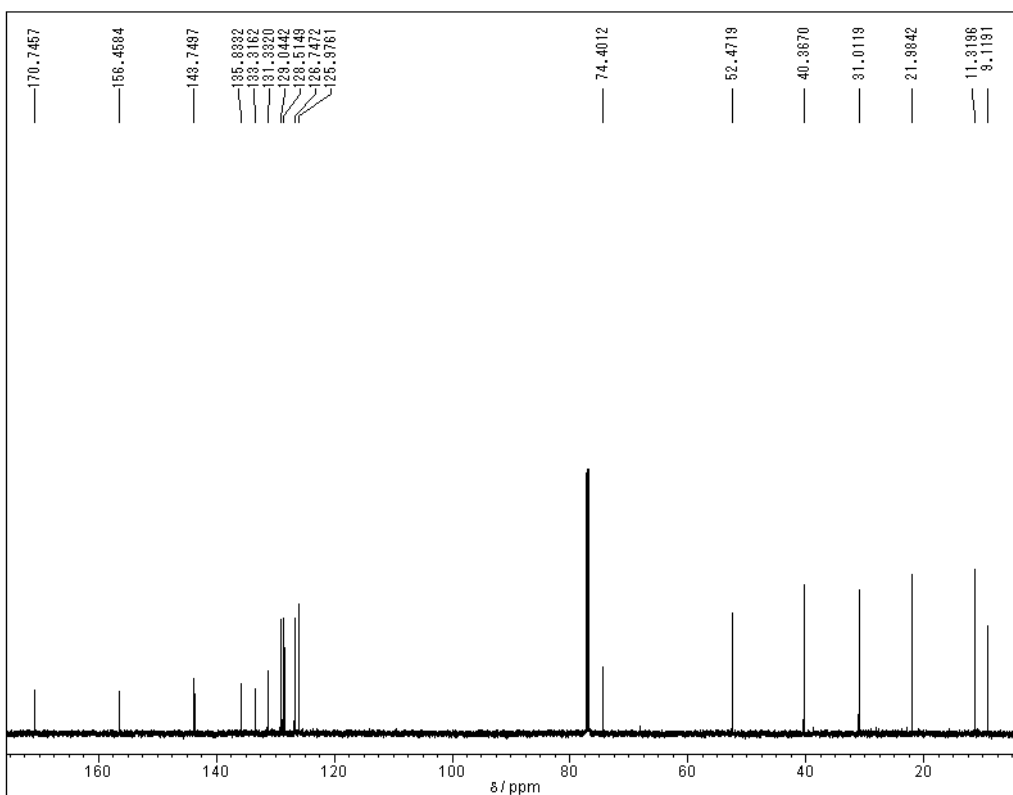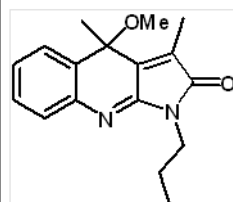

20

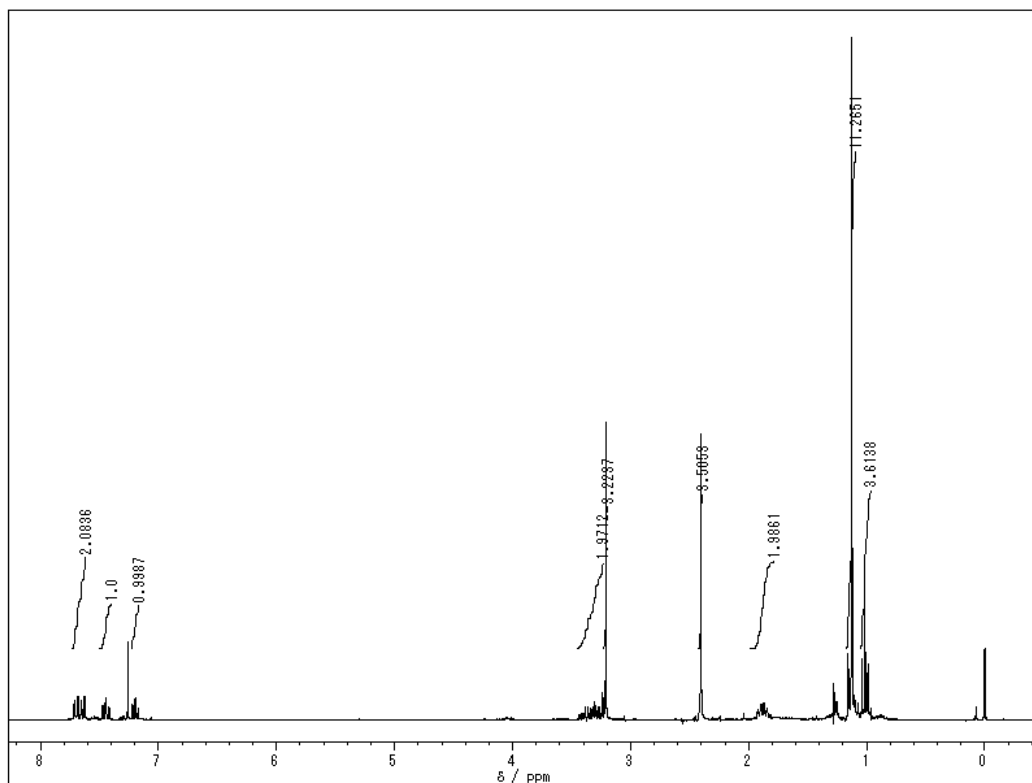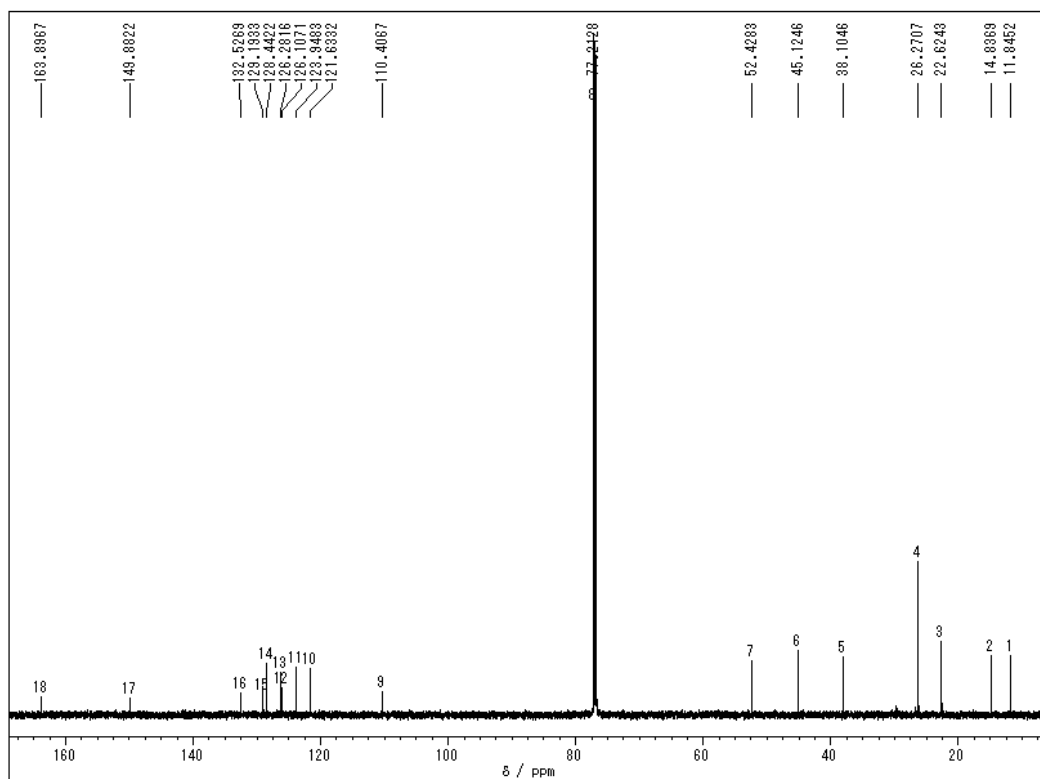

Supplement: b924301a.pdf [file b924301a.pdf]
